# Supplementary material for: Fishes and Rivers of the State of Rio de Janeiro, Southeastern Brazil: Biogeographic and Diversity Patterns in a Historically Well-Sampled Territory
Source: Preprints.org preprint supplement (doi:10.20944/preprints202407.0846.v1), 2024-07-11
Supplement: Supplementary file 1 [file supplementary]

**Table S2 – Records of fish species from the state of Rio de Janeiro listed for this study.**

**RH-1 Região Hidrográfica Baía da Ilha Grande**

**Microbacias de Cairuçu**

Município de Paraty:

*Acentronichthys leptos*: MNRJ 11725(1); MNRJ 11726(1); MNRJ 11795(1); MNRJ 11796(1); MNRJ 11797(1); MNRJ 11798(1); *Alphestes afer*: UFRGS 2137(1); *Astyanax keronolepis*: MCP 11983(10); MCP 11984(16); MCP 26096(3); MCP 31625(55); MNRJ 11039(13); MNRJ 11739(7); MNRJ 13535(25); MNRJ 19125(41); MNRJ 21483(7); MNRJ 24986(2); MNRJ 43442(111); MNRJ 49070(62); MNRJ 49080(11); MNRJ 49106(65); MNRJ 49108(27); MNRJ 49109(6); MZUSP 27531(20); MZUSP 27535(6); UFRGS 14781(21); UFRGS 18786(1); USNM 257504(36); *Atherinella brasiliensis*: UFRGS 1799(10); *Atlantirivulus simplicis*: MNRJ 20249(3); *Awaous tajasica*: MNRJ 11735(3); MNRJ 13838(1); MNRJ 37763(1); MNRJ 37764(2); MNRJ 43445(1); MNRJ 49115(38); *Bryconamericus microcephalus*: MNRJ 11728(5); MNRJ 13538(15); MNRJ 13653(57); MNRJ 21482(47); MNRJ 43443(1); MNRJ 49078(2); MNRJ 49107(6); MNRJ 49128(84); *Cathorops spixii*: UFRGS 2132(1); *Centropomus parallelus*: MNRJ 11741(2); MNRJ 49012(1); *Characidium japyhybense*: MCP 19868(7); MNRJ 11444(38); MNRJ 11445(7); MNRJ 11446(11); MNRJ 13392(81); MNRJ 13536(23); MNRJ 13787(49); MNRJ 13788(26); MNRJ 13789(35); MNRJ 13790(27); MNRJ 13791(23); MNRJ 13792(6); MNRJ 13793(1); MNRJ 13794(36); MNRJ 15443(1); MNRJ 15444(6); MNRJ 15445(2); MNRJ 15446(3); MNRJ 15447(12); MNRJ 15448(8); MNRJ 15449(2); MNRJ 15450(16); MNRJ 17908(5); MNRJ 19595(1); MNRJ 43248(3); MNRJ 43449(3); MNRJ 49073(4); MZUSP 121708(1); ZUEC 5687(2); *Coptodon rendalli*: MNRJ 11733(1); *Ctenogobius boleosoma*: MNRJ 11734(12); UFRGS 2133(6); UFRGS 2135(7); *Deuterodon hastatus*: MNRJ 49075(2); MZUSP 42180(13); MZUSP 111194(16); *Deuterodon intermedius*: USNM 385174(25); *Eleotris pisonis*: MNRJ 11742(5); MNRJ 37765(5); MNRJ 37766(6); *Eucinostomus argenteus*: UFRGS 2136(2); *Eugerres brasilianus*: MNRJ 11736(1); *Geophagus brasiliensis*: MCP 31496(4); MCP 31497(6); MNRJ 11731(6); MNRJ 13834(1); MNRJ 13835(3); MNRJ 13836(3); MNRJ 13837(4); MNRJ 15164(3); MNRJ 15165(4); MNRJ 20253(11); MNRJ 43244(11); MNRJ 43448(41); MNRJ 49104(3); MNRJ 49127(2); MNRJ 49129(2); MZUSP 111156(3); UFRGS 13680(1); UFRGS 18788(1); ZUEC 5223(6); MNRJ 11729(8); MNRJ 13839(1); *Hemipsilichthys nimius*: MCP 38780(5); MZUSP 83458(1); *Hollandichthys multifasciatus*: MCP 30664(62); MCP 32039(1); MNRJ 14846(14); MNRJ 20247(41); MNRJ 43242(85); UFRGS 11775(22); *Hoplias malabaricus*: MNRJ 43444(2); UFRGS 18783(1); USNM 385175(1); *Kronichthys heylandi*: DZSJRP 20443(136); MCP 20105(1); MCP 29464(70); MNRJ 43447(4); MNRJ 45004(25); *Microphis lineatus*: MNRJ 11740(6); *Mugil liza*: UFRGS 2131(1); *Neoplecostomus paraty*: DZSJRP 20442(22); MCP 38782(3); MNRJ 45005(1); *Oreochromis niloticus*: MNRJ 11737(1); *Pareiorhina rudolphi*: MNRJ 17742(25); *Phalloceros anisophallos*: MNRJ 43117(32); MNRJ 43121(15); MNRJ 43127(13); MNRJ 43129(17); MNRJ 43158(3); MNRJ 43504(40); MNRJ 45003(54); MNRJ 52509(165); MZUSP 83437(1); UFRGS 14783(1); UFRGS 18784(18); USNM 257035(28); *Phalloceros enneaktinos*: MCP 30510(10); MCP 31139(40); MNRJ 14847(14); MNRJ 20250(28); MNRJ 20252(48); MNRJ 23609(1); MNRJ 43245(467); UFRGS 14807(8); *Phalloceros leptokeras*: MCP 20594(7); MCP 30509(8); MCP 31350(36); MNRJ 11727(7); MNRJ 23607(1); MNRJ 41429(20); MNRJ 43115(3); MNRJ 43118(5); MNRJ 43119(63); MNRJ 43120(29); MNRJ 43122(12); MNRJ 43123(1); MNRJ 43124(4); MNRJ 43125(17); MNRJ 43126(44); MNRJ 43128(4); MNRJ 43130(12); MNRJ 43131(21); MNRJ 43132(16); MNRJ 43133(2); MNRJ 43134(11); MNRJ 43135(11); MNRJ 43136(32); MNRJ 43137(87); MNRJ 43505(42); MNRJ 43506(318); MNRJ 49071(44); MNRJ 49105(12); MNRJ 49110(10); MNRJ 49112(5); MNRJ 50481(16); MZUSP 115047(46); *Poecilia vivipara*: MNRJ 11724(5); MNRJ 13825(12); MNRJ 13826(2); MZUSP 64144(1); UFRGS 2134(5); *Rhamdia quelen*: MNRJ 11730(2); MNRJ 12410(1); MNRJ 12411(8); UFRGS 18785(1); *Rhamdioglanis frenatus*: MNRJ 43246(2); ZUEC 5667(2); ZUEC 5689(4); *Schizolecis guentheri*: MCP 29465(13); MCP 31561(14); MCP 31569(62); MNRJ 11732(18); MNRJ 13539(31); MNRJ 13657(18); MNRJ 13795(1); MNRJ 13796(2); MNRJ 13797(5); MNRJ 13798(2); MNRJ 13799(4); MNRJ 13833(6); MNRJ 17744(57); MNRJ 17745(25); MNRJ 17746(50); MNRJ 17747(25); MNRJ 17748(14); MNRJ 17749(16); MNRJ 17751(6); MNRJ 20254(18); MNRJ 43243(21); MNRJ 43446(60); MNRJ 45350(4); MNRJ 49072(4); MNRJ 49076(1); MNRJ 49111(17); MZUSP 27536(13); MZUSP 111195(2); UFRGS 14782(16); UFRGS 14808(10); UFRGS 18787(10); USNM 360909(6); USNM 360912(5); *Strongylura timucu*: UFRGS 2138(1); *Trichogenes longipinnis*: MBML 12218(15); MNRJ 11722(8); MNRJ 13809(117); MNRJ 13810(5); MNRJ 13811(2); MNRJ 13812(32); MNRJ 13813(12); MNRJ 13814(14); MNRJ 13815(59); MNRJ 13816(9); MNRJ 13817(36); MNRJ 13818(24); MNRJ 13819(14); MNRJ 13820(6); MNRJ 13821(7); MNRJ 13822(20); MNRJ 13823(30); MNRJ 13824(8); MNRJ 21515(98); MNRJ 25672(2); MNRJ 49103(1); MNRJ 49113(2); MNRJ 49114(30); MZUSP 39034(5); MZUSP 42604(2); MZUSP 48108(3); MZUSP 66682(4); MZUSP 83441(3); MZUSP 83443(2); MZUSP 83453(4); MZUSP 83454(12); MZUSP 93498(8); MZUSP 121706(3); ZUEC 5688(3); ZUEC 5731(5); ZUEC 5732(1); ZUEC 6226(3); *Trichomycterus jacupiranga*: MCP 20628(21); MNRJ 11723(12); MNRJ

13385(22); MNRJ 13537(8); MNRJ 13800(9); MNRJ 13801(1); MNRJ 13802(6); MNRJ 13803(30); MNRJ 13804(20); MNRJ 13805(9); MNRJ 13806(29); MNRJ 13807(16); MNRJ 13808(6); MNRJ 13827(2); MNRJ 13828(7); MNRJ 13829(2); MNRJ 13830(5); MNRJ 13831(3); MNRJ 13832(4); MNRJ 43247(1); MNRJ 43450(1); MNRJ 49077(3); MNRJ 49079(11); *Ulaema lefroyi*: UFRGS 2139(1).

### **Microbacias de Paraty**

Município de Paraty:

*Acentronichthys leptos*: DZSJRP 12491(7); MCP 31896(1); MNRJ 12501(1); MNRJ 42088(5); MNRJ 50601(8); MNRJ 50604(3); MNRJ 52296(3); MZUSP 27539(5); MZUSP 124807(1); UFRGS 14788(1); *Astyanax keronolepis*: DZSJRP 12488(164); MCP 35300(10); MNRJ 41626(2); MNRJ 50594(3); MNRJ 50603(2); MNRJ 50607(3); MNRJ 50610(3); MNRJ 51718(15); UFRGS 18795(4); USNM 257512(3); *Atlantirivulus simplicis*: MNRJ 19431(29); MZUSP 64338(11); *Awaous tajasica*: MNRJ 12496(1); MNRJ 42085(3); MNRJ 43252(4); MNRJ 50582(2); MNRJ 50589(1); MNRJ 50605(1); *Bryconamericus microcephalus*: DZSJRP 12480(23); DZSJRP 13915(7); DZSJRP 18724(22); DZSJRP 20436(3); MCP 31508(10); MCP 31509(1); MNRJ 25786(14); MNRJ 41630(12); MNRJ 41637(17); MNRJ 41640(3); MNRJ 50600(8); MNRJ 50611(3); MNRJ 52293(11); MZUSP 124789(2); MZUSP 124808(1); UFRGS 18789(62); UFRGS 18791(26); USNM 279270(25); *Characidium japyhybense*: DZSJRP 20435(19); DZSJRP 20441(9); MCP 31860(7); MNRJ 12504(1); MNRJ 25743(4); UFRGS 18790(1); ZUEC 3489(1); *Ctenogobius boleosoma*: MNRJ 12498(1); *Deuterodon hastatus*: MNRJ 49118(6); MNRJ 49126(16); *Dormitator maculatus*: MNRJ 19430(5); MNRJ 49125(1); *Eleotris pisonis*: MCP 31516(3); MNRJ 43254(1); MNRJ 50590(3); MNRJ 50606(1); MZUSP 27538(2); *Geophagus brasiliensis*: DZSJRP 12489(2); MCP 31494(6); MCP 31498(1); MNRJ 12494(1); MNRJ 25742(1); MNRJ 41629(2); MNRJ 43251(4); MNRJ 50588(3); MZUSP 27546(2); MZUSP 124802(3); MZUSP 124805(1); UFRGS 14789(4); USNM 307811(3); *Guavina guavina*: MCP 32147(4); *Gymnotus pantherinus*: MCP 31527(1); MCP 32151(1); MCP 32152(7); MNRJ 12493(1); MNRJ 12505(1); MNRJ 43255(2); MNRJ 50584(1); MZUSP 27537(1); UFRGS 13699(1); UFRGS 18792(2); USNM 307806(3); *Hemipsilichthys nimius*: DZSJRP 12482(6); DZSJRP 13916(3); DZSJRP 18725(4); DZSJRP 20430(34); DZSJRP 20438(15); MCP 30671(10); MCP 31573(1); MCP 31990(12); MCP 33049(1); MCP 38777(8); MNRJ 24909(2); MNRJ 24910(1); MNRJ 24911(2); MNRJ 24912(1); MNRJ 24913(6); MNRJ 41633(3); MNRJ 42087(5); MNRJ 43648(1); MNRJ 43649(1); MNRJ 43650(1); MNRJ 50591(3); MNRJ 50595(4); MNRJ 50624(2); *Hollandichthys multifasciatus*: MCP 30665(2); MCP 30666(12); MCP 38784(8); MNRJ 12500(1); MNRJ 21038(10); MNRJ 25764(1); MNRJ 50580(2); MNRJ 50597(7); MNRJ 50608(3); MNRJ 52291(2); MZUSP 124791(3); MZUSP 124794(5); MZUSP 124801(2); UFRGS 11776(13); USNM 257511(1); USNM 307817(4); *Kronichthys heylandi*: DZSJRP 13917(2); DZSJRP 18727(4); DZSJRP 20434(3); DZSJRP 20439(1); MCP 32148(6); MCP 32153(19); MCP 35299(4); MCP 35381(2); MCP 35403(4); MCP 35405(2); MCP 35406(3); MCP 38779(3); MNRJ 3719(5); MNRJ 4838(3); MNRJ 24918(5); MNRJ 40295(1); MNRJ 41627(4); MNRJ 41635(7); MNRJ 41641(1); MNRJ 42082(8); MNRJ 42086(1); MNRJ 50583(4); MNRJ 50613(2); MNRJ 52299(3); MZUSP 27545(20); MZUSP 124795(4); MZUSP 124799(4); USNM 300910(3); *Microphis lineatus*: DZSJRP 12487(1); MNRJ 49124(1); *Mimagoniates microlepis*: MNRJ 12506(1); MNRJ 52294(1); Não identificada: MNRJ 24919(4); MZUSP 27544(1); *Neoplecostomus paraty*: DZSJRP 12481(14); DZSJRP 13914(8); DZSJRP 18726(2); DZSJRP 18733(1); DZSJRP 20425(2); DZSJRP 20429(1); DZSJRP 20433(11); DZSJRP 20440(2); MCP 32149(18); MCP 32154(1); MCP 35298(6); MCP 35380(6); MCP 38781(2); MCP 38787(7); MCP 38789(4); MCP 49449(19); MNRJ 24914(3); MNRJ 41632(4); MNRJ 41634(1); MNRJ 41726(5); MNRJ 41727(12); MNRJ 43647(1); MNRJ 44219(4); MNRJ 50618(3); *Ophichthus cylindroideus*: MNRJ 12495(1); *Pareiorhina rudolphi*: DZSJRP 20428(16); MCP 35382(3); MCP 35404(3); MCP 38778(10); MNRJ 24915(2); MNRJ 24916(2); MNRJ 24917(3); MNRJ 50620(13); *Phalloceros anisophallos*: MCP 30403(1); MCP 31132(18); MCP 31134(69); MCP 31136(53); MCP 32150(7); MNRJ 12502(6); MNRJ 41625(11); MNRJ 41639(5); MNRJ 41642(4); MNRJ 42084(6); MNRJ 42089(29); MNRJ 43253(657); MNRJ 49130(6); MNRJ 50581(3); MNRJ 50622(12); MNRJ 50628(16); MNRJ 50836(3); MNRJ 50837(3); MNRJ 50838(3); MNRJ 50839(3); MNRJ 50840(3); MNRJ 51788(2); MNRJ 52298(9); MZUSP 124792(4); MZUSP 124797(9); MZUSP 124803(8); MZUSP 124809(10); UFRGS 14787(61); UFRGS 18793(14); UMMZ 215277(121); UMMZ 307827(6); USNM 307827(6); *Phalloceros enneaktinos*: DZSJRP 12486(39); DZSJRP 13918(1); DZSJRP 20426(2); *Phalloceros harpagos*: MCP 38785(1); MNRJ 50623(1); *Pimelodella lateristriga*: MNRJ 50585(1); MNRJ 50587(1); MNRJ 50625(1); MZUSP 27541(1); *Poecilia vivipara*: MNRJ 12497(2); UFRGS 1651(4); USNM 307825(4); *Rhamdia quelen*: MNRJ 50586(1); MNRJ 50599(1); MNRJ 50609(1); MNRJ 52292(1); MZUSP 124793(1); MZUSP 124798(1); *Rhamdioglanis frenatus*: DZSJRP 12483(2); DZSJRP 20431(1); DZSJRP 20437(2); MNRJ 12503(1); MNRJ 50593(3); MNRJ 50614(2); MNRJ 52297(1); MZUSP 27540(2); *Schizolecis guentheri*: DZSJRP 12485(14); DZSJRP 12490(92); DZSJRP 13919(2); MCP 31558(103); MCP 31562(1); MCP 32344(25); MCP 32345(1); MNRJ 12499(1); MNRJ 19463(1); MNRJ 41624(5); MNRJ 41628(4); MNRJ 41631(3); MNRJ 41643(7); MNRJ 42083(5); MNRJ 43249(3); MNRJ

43250(16); MNRJ 49119(60); MNRJ 49123(40); MNRJ 50598(20); MNRJ 50612(2); MNRJ 50617(6); MNRJ 52295(11); MZUSP 27543(16); MZUSP 124790(7); MZUSP 124796(9); MZUSP 124800(8); MZUSP 124806(9); UFRGS 18794(3); *Scleromystax barbatus*: MZUSP 27542(1); *Strongylura timucu*: MCP 44108(1); *Trichogenes longipinnis*: DZSJRP 20427(12); MNRJ 50616(1); MNRJ 50619(5); *Trichomycterus jacupiranga*: DZSJRP 12484(12); DZSJRP 20432(6); MCP 38786(3); MNRJ 3721(73); MNRJ 41636(4); MNRJ 41638(1); MNRJ 42081(3); MNRJ 50592(3); MNRJ 50596(1); MNRJ 50602(1); MNRJ 50615(3); MNRJ 50621(1); MNRJ 50626(1); MNRJ 50627(1); MNRJ 50629(2); MZUSP 124804(2);

### **Microbacias de Angra dos Reis**

Município de Angra dos Reis:

*Acentronichthys leptos*: DZSJRP 12494(3); MNRJ 5082(2); MNRJ 5566(12); MNRJ 13644(1); MNRJ 17175(16); MNRJ 17182(6); MNRJ 17183(2); MNRJ 28728(2); MNRJ 28729(2); MNRJ 32672(1); MNRJ 32690(2); MNRJ 38065(2); MNRJ 38086(3); MNRJ 43497(9); MNRJ 43519(1); MNRJ 52211(2); MNRJ 52224(2); *Ancistrus multispinis*: MNRJ 4719(15); MNRJ 4995(13); MNRJ 5557(42); MNRJ 5993(1); MNRJ 32676(11); MNRJ 32697(12); MNRJ 38067(20); MNRJ 38081(23); MNRJ 43516(1); MNRJ 43847(3); MNRJ 52237(1); MNRJ 52253(3); *Astyanax keronolepis*: DZSJRP 12492(2); MNRJ 5569(38); MNRJ 11056(26); MNRJ 11057(21); MNRJ 11058(36); MNRJ 20886(6); MNRJ 32685(17); MNRJ 38800(20); MNRJ 42358(4); MNRJ 51715(5); MNRJ 51716(11); MNRJ 51723(1); MNRJ 52200(7); MNRJ 52209(3); MNRJ 52223(43); MZUSP 3672(63); USNM 385238(11); *Astyanax lacustris*: MNRJ 52222(2); *Atlantirivulus lazzarotoi*: MNRJ 5997(15); MNRJ 6000(1); MNRJ 25940(1); *Awaous tajacica*: MNRJ 11599(10); MNRJ 13641(2); MNRJ 17592(1); MNRJ 19183(4); MNRJ 38084(2); MNRJ 39416(13); MNRJ 43503(1); MNRJ 43852(4); MNRJ 52213(2); MNRJ 52221(6); MNRJ 52231(8); MNRJ 52239(2); MNRJ 52250(2); *Bathygobius soporator*: MNRJ 26470(1); *Bryconamericus microcephalus*: MNRJ 13642(29); MNRJ 17174(1); MNRJ 17178(2); MNRJ 17180(14); MNRJ 17181(1); MNRJ 28733(6); MNRJ 32363(1); MNRJ 32680(23); MNRJ 32687(33); MNRJ 38063(105); MNRJ 38074(235); MNRJ 43854(1); MNRJ 52240(1); *Centropomus parallelus*: MNRJ 11587(4); MNRJ 24249(2); *Characidium japuhyense*: MNRJ 5153(1); MNRJ 5154(1); MNRJ 5155(1); MNRJ 5156(1); MNRJ 5157(1); MNRJ 5158(1); MNRJ 5159(1); MNRJ 5160(1); MNRJ 5161(1); MNRJ 5162(1); MNRJ 5163(1); MNRJ 5191(1); MNRJ 5192(1); MNRJ 5193(1); MNRJ 5194(1); MNRJ 5195(1); MNRJ 5196(1); MNRJ 5197(1); MNRJ 5198(1); MNRJ 5199(1); MNRJ 5200(1); MNRJ 5201(1); MNRJ 5202(1); MNRJ 5203(1); MNRJ 5204(1); MNRJ 5205(1); MNRJ 5206(1); MNRJ 5207(1); MNRJ 5609(1); MNRJ 5928(53); MNRJ 5933(29); MNRJ 11448(87); MNRJ 11449(5); MNRJ 11450(5); MNRJ 11595(1); MNRJ 11692(24); MNRJ 11693(21); MNRJ 19193(3); MNRJ 19399(5); MNRJ 20598(1); MNRJ 20600(1); MNRJ 20876(2); MNRJ 21972(2); MNRJ 24214(1); MNRJ 32668(5); MNRJ 32692(10); MNRJ 33037(17); MNRJ 38072(2); MNRJ 40722(2); MNRJ 40723(2); MNRJ 43512(18); MNRJ 52202(5); MNRJ 52225(1); MNRJ 52255(1); USNM 149945(3); *Ctenogobius shufeldti*: MNRJ 11601(15); MNRJ 52229(56); MNRJ 52233(2); MNRJ 52241(1); *Deuterodon hastatus*: MCP 31525(1); MNRJ 11589(3); MNRJ 17304(2); MNRJ 19180(48); MNRJ 32669(1); MNRJ 38073(15); MNRJ 43492(32); MNRJ 43511(8); MNRJ 43855(1); MNRJ 43887(19); MZUSP 16430(10); *Deuterodon intermedius*: MCP 18291(5); MCP 31626(23); MCP 44577(2); MCP 44582(12); MNRJ 46675(24); MNRJ 52210(4); MZUSP 16419(14); MZUSP 27547(43); MZUSP 27548(27); *Dormitator maculatus*: MNRJ 43898(2); UFRGS 4426(1); *Eleotris pisonis*: MNRJ 11600(2); MNRJ 22137(2); MNRJ 39415(1); *Eugerres brasiliensis*: MNRJ 24248(2); *Geophagus brasiliensis*: MNRJ 4225(26); MNRJ 5562(3); MNRJ 6002(1); MNRJ 6354(1); MNRJ 11590(10); MNRJ 20067(10); MNRJ 23597(2); MNRJ 24243(3); MNRJ 24247(2); MNRJ 26469(1); MNRJ 32679(2); MNRJ 38085(9); MNRJ 43498(1); MNRJ 43518(1); MNRJ 43860(4); MNRJ 43896(9); MNRJ 46677(2); MNRJ 52196(6); MNRJ 52220(42); MZUSP 2555(2); MZUSP 3790(3790); MZUSP 44896(1); MZUSP 44898(6); MZUSP 45010(1); MZUSP 75439(7); *Gymnotus pantherinus*: MCP 31528(1); MNRJ 5560(2); MNRJ 28731(2); MNRJ 28732(1); MNRJ 38071(1); MNRJ 43899(1); *Hemipsilichthys nimius*: MNRJ 17212(9); MNRJ 17213(1); MNRJ 17214(2); MZUSP 3648(1); *Hollandichthys multifasciatus*: MNRJ 4754(1); MNRJ 4755(1); MNRJ 4756(1); MNRJ 4757(1); MNRJ 4758(1); MNRJ 5561(10); MNRJ 5608(2); MNRJ 5991(12); MNRJ 32670(1); MNRJ 52201(1); MNRJ 52252(1); MZUSP 75211(1); *Hoplias malabaricus*: MNRJ 43893(2); MNRJ 43894(1); MNRJ 43895(1); MZUSP 1513(5); *Kronichthys heylandi*: MNRJ 4996(1); MNRJ 5114(4); MNRJ 5563(1); MNRJ 9698(1); MNRJ 32675(21); MNRJ 32683(7); MNRJ 32694(2); MNRJ 32698(18); MNRJ 38068(65); MNRJ 38082(32); MNRJ 39413(14); MNRJ 43515(18); MNRJ 43848(53); MNRJ 49116(3); MNRJ 49122(2); MNRJ 52203(5); MNRJ 52234(5); MNRJ 52242(15); MNRJ 52248(28); MZUSP 3647(3); USNM 385237(2); *Listrura costai*: MNRJ 31535(5); MNRJ 31917(1); MNRJ 31918(5); MNRJ 39620(4); *Microphis lineatus*: MNRJ 11594(3); MNRJ 19179(1); *Mimagoniates microlepis*: MNRJ 5570(122); MNRJ 32686(94); MNRJ 35399(19); MNRJ 38075(92); MNRJ 42359(1); MNRJ 43493(90); MNRJ 43853(1); MNRJ 46673(97); MNRJ 52205(77); MZUSP 19334(5); MZUSP 26900(74); USNM 249874(67); USNM 249882(67); *Mugil brevirostris*: MNRJ 5999(1); *Mugil curema*: MNRJ 11602(2); MNRJ 26468(7); Não identificada: MNRJ 4182(110); MNRJ 4709(34); Não localizado no MNRJ: MNRJ 4181(6); MNRJ 4223(170); MNRJ 4721(8); MNRJ 4722(1); MNRJ 5150(3);

MNRJ 5990(1); MNRJ 6011(1); *Oligosarcus hepsetus*: MNRJ 11596(7); MNRJ 43495(1); MNRJ 52251(1); *Phalloceros anisophallos*: MNRJ 4226(111); MNRJ 4999(1); MNRJ 5568(18); MNRJ 5960(5); MNRJ 5996(1); MNRJ 8518(15); MNRJ 8548(15); MNRJ 11597(19); MNRJ 22142(5); MNRJ 24245(25); MNRJ 26465(5); MNRJ 28725(3); MNRJ 32364(2); MNRJ 32678(64); MNRJ 32688(22); MNRJ 32689(112); MNRJ 38070(4); MNRJ 38083(137); MNRJ 39414(162); MNRJ 42357(89); MNRJ 42915(4); MNRJ 42916(1); MNRJ 43507(57); MNRJ 43520(140); MNRJ 43851(151); MNRJ 43859(103); MNRJ 43897(16); MNRJ 47041(105); MNRJ 52208(13); MNRJ 52219(332); MNRJ 52230(40); MNRJ 52238(2); MNRJ 52245(2); MNRJ 52249(31); MZUSP 1611(4); MZUSP 109804(1); UNT 6772(6); *Phalloceros enneaktinos*: MNRJ 42910(43); *Phalloceros harpagos*: DZSJRP 12493(9); MCP 31345(1); MCP 31355(6); MCP 31583(42); MNRJ 24250(1); MNRJ 42914(40); MNRJ 43508(55); MNRJ 43509(233); MNRJ 43890(23); MNRJ 47042(23); MNRJ 52197(1); MNRJ 52214(17); MNRJ 52228(13); MNRJ 52258(2); *Pimelodella lateristriga*: MCP 31903(1); MNRJ 4710(3); MNRJ 5081(1); MNRJ 5564(24); MNRJ 5995(2); MNRJ 11592(7); MNRJ 17186(1); MNRJ 19181(15); MNRJ 19184(4); MNRJ 20066(1); MNRJ 24244(1); MNRJ 38064(1); MNRJ 43502(2); MNRJ 43888(19); MNRJ 46676(4); MNRJ 52216(4); MZUSP 22367(4); MZUSP 27550(1); MZUSP 82375(2); *Poecilia reticulata*: MNRJ 26466(5); MNRJ 43892(51); MNRJ 51781(27); MNRJ 52195(325); MNRJ 52198(57); *Poecilia vivipara*: MNRJ 11598(5); MNRJ 25939(3); MNRJ 26467(2); MNRJ 28726(13); MNRJ 28727(11); MNRJ 42917(2); MNRJ 43891(20); UNT 6774(13); USNM 385236(16); *Pseudophallus mindii*: MCP 31919(1); MNRJ 19178(1); MNRJ 52226(1); *Rhamdia quelen*: MNRJ 919(1); MNRJ 5565(1); MNRJ 6379(5); MNRJ 11591(2); MNRJ 17187(1); MNRJ 38077(1); MNRJ 43889(6); MNRJ 52227(3); MNRJ 52232(1); MNRJ 52256(1); MZUSP 3675(1); MZUSP 3832(2); *Rhamdioglanis frenatus*: MNRJ 5567(2); MNRJ 13643(3); MNRJ 17177(1); MNRJ 17179(1); MNRJ 17184(1); MNRJ 28730(1); MNRJ 32671(2); MNRJ 32681(1); MNRJ 32693(5); MNRJ 38076(4); MNRJ 43496(6); MNRJ 51710(1); MNRJ 52257(1); *Rineloricaria zawadzki*: MNRJ 5558(2); MNRJ 11588(3); MNRJ 17185(12); MNRJ 17188(2); MNRJ 19182(1); MNRJ 32699(1); MNRJ 43856(3); MNRJ 52254(5); MZUSP 105267(11); *Schizolecis guentheri*: DZSJRP 12495(37); MCP 31557(36); MCP 31560(31); MCP 31578(1); MNRJ 4738(3); MNRJ 4994(50); MNRJ 5559(46); MNRJ 5994(15); MNRJ 6044(3); MNRJ 9867(1); MNRJ 9868(1); MNRJ 9869(1); MNRJ 9870(1); MNRJ 9871(1); MNRJ 9872(1); MNRJ 9873(1); MNRJ 9874(1); MNRJ 9875(1); MNRJ 9876(1); MNRJ 9877(1); MNRJ 9878(1); MNRJ 9879(1); MNRJ 9880(1); MNRJ 9881(1); MNRJ 9882(1); MNRJ 9883(1); MNRJ 9884(1); MNRJ 9885(1); MNRJ 9886(1); MNRJ 9887(1); MNRJ 9888(1); MNRJ 9889(1); MNRJ 9890(1); MNRJ 9891(1); MNRJ 9892(1); MNRJ 9893(1); MNRJ 9894(1); MNRJ 9895(1); MNRJ 9896(1); MNRJ 9897(1); MNRJ 9898(1); MNRJ 9899(1); MNRJ 9900(1); MNRJ 9901(1); MNRJ 9902(1); MNRJ 9903(1); MNRJ 9904(1); MNRJ 9905(1); MNRJ 9906(1); MNRJ 9907(1); MNRJ 9908(1); MNRJ 9909(1); MNRJ 9910(1); MNRJ 9911(1); MNRJ 9912(1); MNRJ 9913(1); MNRJ 9914(1); MNRJ 9915(1); MNRJ 9916(1); MNRJ 9917(1); MNRJ 9918(1); MNRJ 9919(1); MNRJ 9920(1); MNRJ 9921(1); MNRJ 9922(1); MNRJ 9923(1); MNRJ 9924(1); MNRJ 9925(1); MNRJ 9926(1); MNRJ 10067(3); MNRJ 11586(10); MNRJ 17208(15); MNRJ 17209(3); MNRJ 17210(9); MNRJ 17211(1); MNRJ 19177(3); MNRJ 24246(40); MNRJ 32677(127); MNRJ 32684(24); MNRJ 32696(125); MNRJ 32700(1); MNRJ 38069(70); MNRJ 38080(160); MNRJ 43500(156); MNRJ 43501(229); MNRJ 43513(23); MNRJ 43849(36); MNRJ 43850(13); MNRJ 45352(7); MNRJ 46674(33); MNRJ 49121(7); MNRJ 51847(44); MNRJ 52204(20); MNRJ 52207(57); MNRJ 52217(23); MNRJ 52236(11); MNRJ 52243(2); MNRJ 52247(14); MZUSP 8342(1); MZUSP 8343(1); MZUSP 8344(1); MZUSP 22369(7); MZUSP 27549(2); MZUSP 38135(1); MZUSP 63641(1); *Scleromystax barbatus*: DZSJRP 12496(37); MCP 31534(2); MCP 44588(14); MNRJ 4183(8); MNRJ 4224(33); MNRJ 4998(1); MNRJ 5556(9); MNRJ 5992(10); MNRJ 24242(3); MNRJ 32674(2); MNRJ 32691(29); MNRJ 38079(125); MNRJ 43494(31); MNRJ 46672(26); MNRJ 49120(18); MNRJ 52199(2); MNRJ 52206(6); MNRJ 52218(44); MNRJ 52235(2); MNRJ 52244(1); MNRJ 52246(25); MZUSP 22368(2); *Stegastes fuscus*: MNRJ 42360(1); *Synbranchus marmoratus*: MNRJ 5998(1); MZUSP 42537(1); MZUSP 42549(1); *Trichomycterus jacupiranga*: MNRJ 4720(14); MNRJ 4997(7); MNRJ 6001(1); MNRJ 11593(2); MNRJ 13645(1); MNRJ 17176(3); MNRJ 32673(3); MNRJ 32682(1); MNRJ 32695(4); MNRJ 34140(2); MNRJ 34141(1); MNRJ 38066(20); MNRJ 38078(9); MNRJ 43499(5); MNRJ 43517(1); MNRJ 43846(12); MNRJ 52212(1); MNRJ 52259(6).

### **Microbacias de Angra dos Reis**

Município de Paraty:

*Astyanax keronolepis*: UFRGS 18797(17); UFRGS 18803(2); UFRGS 18805(4); *Aulostomus strigosus*: UFRGS 18799(2); *Characidium japyhybense*: MNRJ 11690(26); MNRJ 19380(27); *Dormitator maculatus*: UFRGS 19185(2); *Geophagus brasiliensis*: UFRGS 18796(2); UFRGS 18801(1); *Oligosarcus hepsetus*: UFRGS 18802(1); *Otothyris lophophanes*: FRGS 18800(2); *Phalloceros anisophallos*: UFRGS 18798(3); UFRGS 18804(10); *Rhamdioglanis frenatus*: MNRJ 19130(4); *Taunayia bifasciata*: UFRN 5992(2); *Trichomycterus jacupiranga*: MNRJ 19131(14).

## **RH-2 Região Hidrográfica Guandu**

### **Microbacias Mangaratiba**

Município de Mangaratiba:

*Awaous tajasica*: MNRJ 24114(1); MNRJ 49534(1); MNRJ 51739(1); *Centropomus parallelus*: MNRJ 26461(2); *Characidium grajahuense*: MNRJ 20866(2); *Crenicichla lepidota*: MNRJ 51738(1); *Ctenogobius shufeldti*: MNRJ 26462(1); *Deuterodon hastatus*: MNRJ 51713(36); MNRJ 51734(8); *Deuterodon intermedius*: MNRJ 20868(14); MNRJ 21050(1); *Dormitator maculatus*: MNRJ 26463(4); *Eleotris pisonis*: MNRJ 26464(3); *Evorthodus lyricus*: MNRJ 49760(13); *Geophagus brasiliensis*: MNRJ 20870(3); MNRJ 24111(1); MNRJ 26457(2); MNRJ 51834(2); *Gobiesox barbatulus*: MNRJ 20046(1); *Hollandichthys multifasciatus*: MNRJ 10952(9); MNRJ 26279(2); *Hoplias malabaricus*: MNRJ 24112(2); *Kryptolebias brasiliensis*: MNRJ 19507(3); MNRJ 19508(22); MNRJ 24113(2); MNRJ 26456(2); MZUSP 38312(3); *Kryptolebias ocellatus*: MNRJ 11369(15); MNRJ 11397(38); MNRJ 19538(3); MNRJ 19539(22); MNRJ 26460(2); MZUSP 38335(5); MZUSP 38451(1); *Microphis lineatus*: MNRJ 50187(2); *Mimagoniates microlepis*: MNRJ 24109(2); MNRJ 26454(6); MNRJ 51735(9); Não identificada: MNRJ 25757(1); *Neoplecostomus microps*: MNRJ 20865(2); MNRJ 51835(1); *Phalloceros anisophallos*: MNRJ 20867(143); MNRJ 24110(42); MNRJ 26455(11); MNRJ 26458(2); MNRJ 51736(463); MNRJ 51740(13); MNRJ 51839(7); USNM 307821(18); *Phalloceros leptokeras*: MNRJ 11364(1); *Phalloceros tupinamba*: MNRJ 51337(13); *Poecilia reticulata*: MNRJ 51737(1); MNRJ 51741(57); MNRJ 51840(4); *Poecilia vivipara*: MNRJ 11360(2); MNRJ 26459(1); *Rhamdia quelen*: MNRJ 51838(2); *Rhamdioglanis frenatus*: MNRJ 51742(4); *Rineloricaria zawadzki*: MNRJ 20869(10); MNRJ 51837(4); *Schizolecis guentheri*: MNRJ 51836(1); *Trichomycterus jacupiranga*: MNRJ 4033(1); MNRJ 4034(8); *Trichomycterus potschi*: MCP 29061(1); MCP 29062(2); MNRJ 3725(2); MNRJ 52215(1).

### **Microbacias de Sepetiba**

Município de Itaguaí:

*Acentronichthys leptos*: MNRJ 39817(2); MNRJ 40660(2); MNRJ 51731(2); *Awaous tajasica*: MNRJ 20858(2); *Callichthys callichthys*: MNRJ 6050(1); *Characidium grajahuense*: MNRJ 20852(2); MNRJ 24359(5); *Crenicichla lepidota*: MNRJ 51729(1); *Deuterodon hastatus*: MNRJ 20857(3); *Deuterodon intermedius*: MNRJ 51714(3); MZUSP 121277(1); MZUSP 121278(1); *Deuterodon janeiroensis*: MNRJ 20864(2); MNRJ 51733(2); *Geophagus brasiliensis*: MNRJ 20860(9); MNRJ 51730(1); *Imparfinis piperatus*: MNRJ 24361(1); *Mimagoniates microlepis*: MNRJ 20863(2); MNRJ 51725(38); MZUSP 118713(4); *Parotocinclus maculicauda*: MNRJ 20862(1); MNRJ 51726(16); *Phalloceros tupinamba*: MNRJ 20855(59); MNRJ 24360(102); MNRJ 51353(25); MNRJ 51732(1); *Pimelodella lateristriga*: MNRJ 20859(1); MZUSP 121279(2); *Poecilia reticulata*: MNRJ 20854(16); MNRJ 24358(6); MNRJ 51728(37); *Rineloricaria zawadzki*: MNRJ 20856(3); MNRJ 20861(1); MNRJ 51727(5); MZUSP 121280(3); *Trichomycterus potschi*: MNRJ 20853(34); MNRJ 24362(16); MNRJ 39818(2); MZUSP 121369(8).

### **Microbacias do Rio de Janeiro**

Município de Engenheiro Paulo de Frontin:

*Callichthys callichthys*: MNRJ 4708(9); *Hypostomus punctatus*: DZSJRP 12521(11); Não identificada: MNRJ 4706(9); *Poecilia vivipara*: DZSJRP 12520(36); *Pseudotothyris janeirensis*: DZSJRP 12518(9); MNRJ 4707(115); MNRJ 10278(1); MNRJ 10279(1); MNRJ 10280(1); MNRJ 10281(1); MNRJ 10282(1); MNRJ 10283(1); MNRJ 10284(1); MNRJ 10285(1); MNRJ 10286(1); MNRJ 10287(1); MNRJ 10288(1); MNRJ 10289(1); MNRJ 10290(1); MNRJ 10291(1); MNRJ 10292(1); MNRJ 10293(1); MNRJ 10294(1); MNRJ 10295(1); MNRJ 10296(1); MZUSP 38138(2); *Rineloricaria nudipectoris*: DZSJRP 12522(6); *Scleromystax barbatus*: DZSJRP 12519(4).

### **Microbacias do Rio de Janeiro**

Município de Itaguaí

*Achirus lineatus*: MZUSP 28281(1); *Aspistor luniscutis*: MZUSP 28299(1); *Astyanax lacustris*: MNRJ 31170(395); MZUSP 28274(1); *Australoheros oblongus*: MZUSP 28297(1); MZUSP 28298(1); *Callichthys callichthys*: MNRJ 9685(1); MNRJ 31162(18); *Centropomus parallelus*: MZUSP 28293(1); MZUSP 28294(1); *Centropomus undecimalis*: MZUSP 28284(1); *Cetengraulis edentulus*: MZUSP 28278(1); *Characidium grajahuense*: MNRJ 24363(6); MZUSP 20202(1); *Characidium interruptum*: MZUSP 20204(1); *Citharichthys spilopterus*: MZUSP 28270(3); *Corydoras nattereri*: MZUSP 23760(1); *Crenicichla lepidota*: MNRJ 24365(1); MNRJ 31174(8); *Cyphocharax gilbert*: MCP 20361(1); MNRJ 31167(438); *Deuterodon intermedius*: MCP 14559(5); MNRJ 24364(6); MNRJ 25734(1); MZUSP 17825(21); MZUSP 17829(2); *Deuterodon janeiroensis*: MNRJ 24105(2); MNRJ 31171(454); MNRJ 31172(143); MNRJ 31175(4500); MNRJ 31176(10);

*Eugerres brasiliensis*: MZUSP 27884(1); *Genidens barbatus*: MZUSP 28275(1); *Genidens genidens*: MZUSP 28269(2); *Geophagus brasiliensis*: MNRJ 31173(18); MZUSP 27863(1); MZUSP 27864(1); MZUSP 27865(1); MZUSP 27866(1); MZUSP 28285(19); MZUSP 28286(3); MZUSP 44993(9); *Gobionellus oceanicus*: MZUSP 28280(1); *Gymnotus carapo*: MNRJ 31165(2); *Hisonotus notatus*: MNRJ 9683(1); MNRJ 9990(1); MNRJ 9991(1); MNRJ 9992(1); MNRJ 9993(1); MNRJ 9994(1); MNRJ 9995(1); MNRJ 9996(1); MNRJ 9997(1); MNRJ 9998(1); MNRJ 9999(1); MNRJ 10000(1); MNRJ 10001(1); MNRJ 10002(1); MNRJ 10003(1); MNRJ 10004(1); MNRJ 10005(1); MZUSP 10315(22); MZUSP 10316(28); MZUSP 23784(1); *Hoplias malabaricus*: MNRJ 31166(4); MZUSP 23763(1); *Hoplosternum littorale*: MNRJ 31163(68); *Hyphessobrycon bifasciatus*: MNRJ 31168(52); MZUSP 17824(2); MZUSP 17826(2); MZUSP 81020(6); MZUSP 83710(22); *Hyphessobrycon boulengeri*: MNRJ 31169(6); MZUSP 17830(6); *Hyphessobrycon flammeus*: MZUSP 51020(1); ZUEC 4253(7); *Hypostomus punctatus*: MNRJ 24367(1); MZUSP 27860(1); *Microglanis parahybae*: MZUSP 23759(3); MZUSP 23761(1); *Micropogonias furnieri*: MZUSP 28276(1); *Mugil curema*: MZUSP 27871(1); MZUSP 28295(1); MZUSP 28296(1); *Mugil liza*: MZUSP 27870(1); MZUSP 28291(12); MZUSP 28292(3); MZUSP 44944(1); *Notholebias minimus*: MNRJ 25741(1); *Oligoplites palometa*: MZUSP 28277(1); *Oligosarcus hepsetus*: MZUSP 27875(1); MZUSP 28283(1); *Otothyris lophophanes*: MZUSP 8729(1); MZUSP 8730(1); MZUSP 8731(1); MZUSP 8732(1); MZUSP 8733(1); MZUSP 8734(1); MZUSP 8735(1); MZUSP 8736(1); MZUSP 23786(1); *Paralichthys brasiliensis*: MZUSP 27883(1); *Parotocinclus maculicauda*: MNRJ 10098(1); MNRJ 24368(14); MZUSP 8678(4); MZUSP 8679(20); MZUSP 23785(1); *Phalloceros anisophallos*: MNRJ 24106(6); MNRJ 31159(44); MNRJ 51784(2); MZUSP 43469(19); MZUSP 64209(31); *Poecilia reticulata*: MNRJ 24107(1); MNRJ 31161(41); *Poecilia vivipara*: MNRJ 31160(2); *Pogonias courbina*: MZUSP 28300(1); *Polycentrus schomburgkii*: MNRJ 24108(30); *Rhamdia quelen*: MZUSP 27878(2); *Rhamdioglanis transfasciatus*: MZUSP 23762(1); *Rhonciscus crocro*: MZUSP 28279(1); *Rineloricaria nudipectoris*: MZUSP 23758(4); *Rineloricaria zawadzki*: MNRJ 24366(6); *Scleromystax barbatus*: MNRJ 9684(1); *Spintherobolus brocace*: MZUSP 17827(1); MZUSP 17828(1); *Synbranchus marmoratus*: MNRJ 31164(1); *Trachelyopterus striatulus*: MZUSP 27869(1); *Trinectes paulistanus*: MZUSP 28282(1).

#### **Microbacias do Rio de Janeiro**

##### **Município de Japeri**

*Ancistrus multispinis*: MNRJ 44043(14); MNRJ 50872(10); MNRJ 51776(7); *Astyanax keronolepis*: MNRJ 24435(1); MNRJ 24437(1); MNRJ 51772(33); *Bryconamericus ornateps*: MNRJ 52333(27); *Characidium grajahuense*: MNRJ 24428(1); MNRJ 44040(29); UFRGS 18807(2); *Characidium vidali*: MNRJ 52335(4); *Crenicichla lepidota*: MNRJ 44050(8); MNRJ 51778(3); *Deuterodon janeiroensis*: MNRJ 24432(15); MNRJ 24433(1); MNRJ 44039(20); MNRJ 51352(6); UFRGS 18806(82); UFRGS 18810(6); *Geophagus brasiliensis*: MNRJ 24425(5); MNRJ 44051(1); MNRJ 52337(2); *Gymnotus carapo*: MNRJ 44052(1); *Homodiaetus passarellii*: MNRJ 24422(2); *Hypostomus punctatus*: MNRJ 24430(6); MNRJ 44045(2); *Imparfinis piperatus*: MNRJ 24424(1); *Mimagoniates microlepis*: MNRJ 24434(22); MNRJ 44041(15); MNRJ 52334(17); UFRGS 18808(17); *Oligosarcus hepsetus*: MNRJ 24436(1); *Parotocinclus maculicauda*: MNRJ 24429(41); MNRJ 44046(1); MNRJ 51777(1); MNRJ 52336(3); UFRGS 18809(3); *Phalloceros anisophallos*: MNRJ 24427(29); MNRJ 44048(6); MNRJ 44053(2); MNRJ 51780(2); MNRJ 52339(126); *Pimelodella lateristriga*: MNRJ 24423(10); *Poecilia reticulata*: MNRJ 24426(2); MNRJ 44054(2); MNRJ 51779(48); MNRJ 52338(551); *Rineloricaria zawadzki*: MNRJ 23839(41); MNRJ 26623(6); MNRJ 44047(4); MNRJ 51774(4); *Schizolecis guentheri*: MNRJ 24431(93); MNRJ 44044(5); MNRJ 51775(3); *Scleromystax barbatus*: MNRJ 24420(75); MNRJ 44042(13); MNRJ 51773(1); *Synbranchus marmoratus*: MNRJ 44049(1); *Trichomycterus potschi*: MNRJ 24421(27).

#### **Microbacias do Rio de Janeiro**

##### **Município de Miguel Pereira**

*Acentronichthys leptos*: MNRJ 41198(4); *Ancistrus multispinis*: MNRJ 41202(20); MNRJ 47378(3); *Astyanax lacustris*: MNRJ 47446(2); *Australoheros oblongus*: MCP 54087(2); MNRJ 43968(2); MNRJ 47418(6); *Bryconamericus ornateps*: MCP 43995(20); MNRJ 17852(5); MNRJ 17853(9); MNRJ 17854(20); MNRJ 41197(55); MNRJ 43971(15); MNRJ 43980(30); MNRJ 47375(25); MNRJ 47408(26); *Callichthys callichthys*: MNRJ 20045(1); *Coptodon rendalli*: MNRJ 43970(14); MNRJ 47419(1); *Geophagus brasiliensis*: MNRJ 15106(2); MNRJ 17413(11); MNRJ 41207(3); MNRJ 43969(16); MNRJ 43982(5); MNRJ 47417(48); *Gymnotus pantherinus*: MCP 44165(2); MNRJ 47421(8); *Hemipsilichthys papillatus*: MNRJ 41206(2); *Hoplias malabaricus*: MNRJ 19008(1); *Hyphessobrycon bifasciatus*: MNRJ 47420(1); *Hypostomus punctatus*: MZUSP 74014(1); *Imparfinis minutus*: MNRJ 41199(12); *Kronichthys heylandi*: MCP 44151(16); MNRJ 43973(7); MNRJ 47413(13); *Neoplecostomus microps*: MCP 44190(5); MNRJ 43963(15); MZUSP 53998(2); *Parotocinclus maculicauda*: MNRJ 41203(16); MNRJ 47379(11); MNRJ 50874(1); *Phalloceros harpagos*: MNRJ 20883(12); MNRJ 41208(4); MNRJ 43964(51); MNRJ 43966(2); MNRJ 47383(1); MNRJ 47415(55); *Poecilia reticulata*: MNRJ 20025(15); MNRJ 20036(2); MNRJ 20899(2); MNRJ 41209(2); MNRJ 43975(2); MNRJ 43981(4); MNRJ 47382(44); MNRJ 47416(128); *Rhamdia quelen*: MNRJ 17815(4); MNRJ 17818(10); MNRJ 41200(2); MNRJ 43965(1); MNRJ 47376(2); MNRJ 47409(2); *Rhamdioglanis frenatus*: MCP 44145(1); MCP 44147(1); MNRJ 15744(8); MNRJ 43972(15);

MNRJ 43976(24); MNRJ 47410(9); *Rineloricaria nigricauda*: MNRJ 17816(33); MNRJ 41204(18); MNRJ 43978(2); MNRJ 47380(75); MNRJ 47412(5); *Rineloricaria nudipectoris*: MNRJ 17828(12); *Schizolecis guentheri*: MCP 44148(7); MNRJ 19615(57); MNRJ 19620(40); MNRJ 41205(79); MNRJ 43974(72); MNRJ 43979(5); MNRJ 47381(17); MNRJ 47414(221); *Trichomycterus giganteus*: MCP 44166(1); MNRJ 43962(11); MNRJ 43977(1); MNRJ 47377(86); MNRJ 47411(18); *Trichomycterus potschi*: MCP 44146(3); MCP 44149(2); MNRJ 17817(1); MNRJ 17821(2); MNRJ 20884(7); MNRJ 20885(11); MNRJ 41201(14); MZUSP 53999(1); *Xiphophorus helleri*: MNRJ 43967(3).

### **Microbacias do Rio de Janeiro**

#### **Município de Nova Iguaçu**

*Acentronichthys leptos*: MCP 44206(1); MCP 44220(2); MNRJ 24129(1); MNRJ 43287(1); MNRJ 47385(2); MNRJ 47389(1); *Ancistrus multispinis*: MCP 44185(2); MNRJ 24392(4); MNRJ 41175(9); MNRJ 43294(3); MNRJ 44035(5); MNRJ 47386(1); MNRJ 47391(2); *Astyanax keronolepis*: MCP 44186(2); MNRJ 5980(1); MNRJ 24399(13); MNRJ 43285(7); MNRJ 43290(9); MNRJ 47783(5); MNRJ 47784(25); *Bryconamericus ornaticeps*: MCP 44191(6); MNRJ 44032(49); *Characidium grajahuense*: MCP 44187(2); MCP 44201(4); MNRJ 39100(1); MNRJ 41173(8); MNRJ 43286(33); MNRJ 43291(3); MNRJ 44027(3); MNRJ 44034(2); MNRJ 47384(15); MNRJ 47387(1); *Crenicichla lepidota*: MNRJ 47397(2); *Deuterodon janeiroensis*: MNRJ 11063(22); *Geophagus brasiliensis*: MCP 44193(2); MNRJ 24132(4); MNRJ 24400(13); MNRJ 43299(11); MNRJ 47398(2); *Hisonotus notatus*: MNRJ 40311(1); *Hoplias malabaricus*: MCP 44208(1); *Hoplosternum littorale*: MNRJ 24391(1); *Hypostomus punctatus*: MNRJ 24393(3); *Kronichthys heylandi*: MCP 44200(2); MCP 44212(3); MCP 44219(44); MCP 44305(2); MNRJ 5031(6); MNRJ 44014(47); MNRJ 44017(20); MNRJ 44020(5); MNRJ 44036(1); MNRJ 47392(1); *Kryptolebias caudomarginatus*: MNRJ 51771(1); *Microglanis parahybae*: MNRJ 39101(1); *Mimagoniates microlepis*: MCP 44188(15); MCP 44210(6); MNRJ 24396(13); MNRJ 43292(44); MNRJ 44033(29); MNRJ 47388(1); Não identificada: MNRJ 5037(1); *Neoplecostomus microps*: MNRJ 44030(1); *Oligosarcus hepsetus*: MCP 44209(1); *Otocinclus affinis*: MNRJ 18021(4); *Parotocinclus maculicauda*: MCP 44205(8); MNRJ 24401(1); MNRJ 39102(4); MNRJ 43295(3); *Phalloceros anisophallos*: MNRJ 24130(11); MNRJ 43297(7); *Phalloceros harpagos*: MCP 44197(6); MCP 44215(51); MCP 44306(2); MNRJ 44015(72); MNRJ 44031(7); MNRJ 44038(3); MNRJ 47396(1); MNRJ 50052(1); MNRJ 51770(49); *Phalloceros leptokeras*: MNRJ 24398(4); MNRJ 43300(4); MNRJ 50051(1); *Poecilia reticulata*: MCP 44218(2); MNRJ 24131(9); MNRJ 24397(54); MNRJ 43298(53); MNRJ 44037(81); *Rhamdioglanis frenatus*: MNRJ 43288(8); MNRJ 44028(1); *Rineloricaria nigricauda*: MCP 44192(4); MNRJ 47393(1); *Rineloricaria zawadzki*: MNRJ 23847(2); *Schizolecis guentheri*: MCP 44204(4); MNRJ 24394(2); MNRJ 43296(1); MNRJ 47394(3); *Scleromystax barbatus*: MCP 44213(3); MNRJ 24395(7); MNRJ 43293(2); MNRJ 47390(5); *Synbranchus marmoratus*: MNRJ 47395(1); *Trichomycterus giganteus*: MCP 44184(1); MCP 44216(1); MCP 44217(2); MNRJ 41174(7); MNRJ 44016(10); MNRJ 44018(1); MNRJ 44019(26); *Trichomycterus jacupiranga*: MNRJ 5948(8); MNRJ 6067(3); MNRJ 43289(8); MNRJ 44013(1); MNRJ 44029(1).

### **Microbacias do Rio de Janeiro**

#### **Município de Paracambi**

*Cyphocharax gilbert*: MNRJ 17503(1); *Geophagus brasiliensis*: MNRJ 17527(1); MNRJ 18274(1); MNRJ 18275(1); *Glanidium melanopterum*: MNRJ 17530(6); MNRJ 18272(6); *Gymnotus carapo*: MNRJ 17506(1); *Hoplias malabaricus*: MNRJ 17505(2); *Hypomasticus copelandii*: MNRJ 17531(1); *Hypostomus punctatus*: DZSJRP 12514(15); MNRJ 17528(5); MNRJ 18271(1); *Loricariichthys castaneus*: MNRJ 17529(6); MNRJ 18273(1); *Oligosarcus hepsetus*: MNRJ 17502(2); *Pimelodus maculatus*: MNRJ 17504(2); *Poecilia vivipara*: DZSJRP 12513(93); *Psilododon parahybae*: MNRJ 17507(3); *Pseudotothyris janeirensis*: DZSJRP 12512(2); *Rhamdia quelen*: DZSJRP 12516(1); *Rineloricaria nigricauda*: DZSJRP 12511(8); MNRJ 17479(4); *Scleromystax barbatus*: DZSJRP 12515(18); *Synbranchus marmoratus*: MNRJ 19626(2).

### **Microbacias do Rio de Janeiro**

#### **Município de Pirai**

*Ancistrus multispinis*: MNRJ 41164(2); MNRJ 41188(16); *Astyanax lacustris*: MNRJ 17477(2); MNRJ 17495(29); MNRJ 17518(15); MNRJ 41160(22); MNRJ 41186(1); MNRJ 50723(1); *Callichthys callichthys*: MNRJ 41166(1); *Cichla kelberi*: MNRJ 17476(1); MNRJ 26141(5); MNRJ 28416(1); *Crenicichla lepidota*: MNRJ 41195(1); *Deuterodon janeiroensis*: MNRJ 17475(18); MNRJ 17523(75); MNRJ 25870(14); MNRJ 41171(7); MNRJ 41187(9); *Geophagus brasiliensis*: MNRJ 17480(2); MNRJ 17494(1); MNRJ 17497(28); MNRJ 17526(1); MNRJ 41167(13); MNRJ 41193(8); *Glanidium melanopterum*: MNRJ 17485(2); *Hoplias malabaricus*: MNRJ 41161(1); *Hypomasticus copelandii*: MNRJ 17532(1); *Hypostomus punctatus*: MNRJ 17482(2); MNRJ 26139(1); MNRJ 28414(1); *Loricariichthys castaneus*: MNRJ 17474(1); MNRJ 17487(11); MNRJ 17521(28); MNRJ 17522(25); MNRJ 26140(4); *Metynnis maculatus*: MNRJ 28415(6); Não identificada: MNRJ 41172(3); *Oligosarcus hepsetus*: MNRJ 17478(1); MNRJ 17486(4); MNRJ 17492(6); MNRJ 17519(4); MNRJ 26142(21); *Pachyurus adspersus*: MNRJ 17481(1); MNRJ 17517(1); *Parotocinclus maculicauda*: MNRJ 17493(16); MNRJ 17501(34); MNRJ 41165(81); MNRJ 41189(20); *Phalloceros leptokeras*: MNRJ 41168(7); *Pimelodella lateristriga*:



MNRJ 41163(2); MNRJ 41196(1); *Pimelodus maculatus*: MNRJ 17483(4); MNRJ 17525(2); *Poecilia reticulata*: MNRJ 17489(4); MNRJ 17500(19); MNRJ 41169(75); MNRJ 41194(4); *Prochilodus lineatus*: MNRJ 28413(1); MNRJ 41570(1); *Psalidodon parahybae*: MNRJ 17488(34); MNRJ 17520(27); MNRJ 20715(24); MNRJ 20717(32); MNRJ 20730(1); *Rhamdia quelen*: MNRJ 12372(3); MNRJ 17524(1); MNRJ 28417(2); MNRJ 41162(3); MNRJ 41191(3); *Rhamdioglanis frenatus*: MNRJ 17496(1); *Rineloricaria nigricauda*: MNRJ 17484(7); MNRJ 17491(5); MNRJ 17498(8); MNRJ 41170(43); MNRJ 41190(19); *Trichomycterus claudiae*: MNRJ 17490(1); MNRJ 17499(12); MNRJ 41192(18).

### **Microbacias do Rio de Janeiro**

Município de Queimados

*Characidium interruptum*: MNRJ 4693(1); MNRJ 4697(1); MNRJ 4698(1); MNRJ 4699(1); MNRJ 4700(1); MNRJ 4701(1); MNRJ 4702(1); MNRJ 4703(1); MNRJ 4704(1); MNRJ 4705(1); *Cichla kelberi*: MNRJ 15496(1); *Cyphocharax gilbert*: MNRJ 15495(1); *Deuterodon heterostomus*: MNRJ 10950(1); *Deuterodon janeiroensis*: MNRJ 10949(4); MNRJ 10951(2); MNRJ 15493(1); *Geophagus brasiliensis*: MNRJ 15498(1); *Hyphessobrycon boulengeri*: MNRJ 4694(2); *Loricariichthys castaneus*: MNRJ 15497(1); *Megaleporinus conirostris*: MNRJ 15494(1); *Parotocinclus maculicauda*: MNRJ 4691(1); MNRJ 10082(1); MNRJ 10083(1); MNRJ 10084(1); MNRJ 10085(1); MNRJ 10086(1); MNRJ 10087(1); MNRJ 10088(1); MNRJ 10089(1); MNRJ 10090(1); MNRJ 10091(1); *Pimelodella lateristriga*: MNRJ 10948(1); *Psalidodon parahybae*: MNRJ 4696(3).

### **Microbacias do Rio de Janeiro**

Município de Rio Claro

*Australoheros oblongus*: MNRJ 17942(2); MNRJ 17986(1); *Characidium vidali*: MNRJ 12244(9); MNRJ 12245(82); MNRJ 12248(1); MNRJ 12249(3); MNRJ 12250(20); MNRJ 12251(27); *Cichla kelberi*: MNRJ 17939(1); MNRJ 25911(2); MNRJ 26018(1); MNRJ 26037(1); *Coptodon rendalli*: MNRJ 17921(6); MNRJ 25910(1); MNRJ 25926(1); MNRJ 26022(1); MNRJ 26029(3); MNRJ 26144(3); *Corydoras nattereri*: MNRJ 17968(8); *Cyphocharax gilbert*: MNRJ 25908(5); MNRJ 25922(2); MNRJ 26019(1); MNRJ 26026(2); MNRJ 26036(14); *Deuterodon intermedius*: MNRJ 16948(31); MNRJ 16949(101); MNRJ 17926(53); MNRJ 17927(23); MNRJ 17934(1); MNRJ 17937(9); MNRJ 17945(10); MNRJ 17954(2); MNRJ 17959(1); MNRJ 17964(3); MNRJ 17975(17); MNRJ 17983(3); MNRJ 20707(1); MNRJ 20708(1); MNRJ 20709(3); MNRJ 20710(5); MNRJ 20711(11); MNRJ 20712(1); MNRJ 20714(4); MNRJ 20718(30); MNRJ 20719(25); MNRJ 20720(8); MNRJ 20727(9); MNRJ 20728(12); MNRJ 24373(12); MNRJ 25913(1); MNRJ 25914(45); MNRJ 25915(4); MNRJ 25916(5); MNRJ 25917(3); MNRJ 25918(48); MNRJ 25919(35); MNRJ 25927(25); MNRJ 25928(74); MNRJ 26023(45); MNRJ 26025(25); MNRJ 26030(5); MNRJ 26033(49); *Deuterodon janeiroensis*: MNRJ 17930(197); MNRJ 17961(7); MNRJ 20706(4); MNRJ 20713(3); MNRJ 20716(41); MNRJ 26024(6); *Geophagus brasiliensis*: MNRJ 13393(8); MNRJ 17923(15); MNRJ 17936(3); MNRJ 17938(5); MNRJ 17943(1); MNRJ 17947(1); MNRJ 17950(3); MNRJ 17969(2); MNRJ 17972(1); MNRJ 17989(1); MNRJ 24369(29); MNRJ 25923(3); MNRJ 26150(1); MNRJ 43116(1); *Gymnotus carapo*: MNRJ 17919(1); MNRJ 17920(10); *Harttia loricariformis*: MNRJ 17924(12); *Hoplerethrinus unitaeniatus*: MNRJ 26031(1); *Hoplias malabaricus*: MNRJ 17949(1); MNRJ 17976(1); MNRJ 26020(2); MNRJ 26032(1); MNRJ 26148(1); *Hypomasticus copelandii*: MNRJ 26143(1); MNRJ 26146(1); MNRJ 41563(1); MNRJ 41564(1); MNRJ 41565(1); MNRJ 41566(1); MNRJ 41567(1); MNRJ 41568(1); *Hypomasticus mormyrops*: MNRJ 17929(3); *Hypostomus punctatus*: MNRJ 17922(3); MNRJ 17957(2); MNRJ 26034(1); MNRJ 26145(6); *Imparfinis piperatus*: MNRJ 24374(2); *Loricariichthys castaneus*: MNRJ 26151(7); *Megaleporinus conirostris*: MNRJ 26149(1); *Microglanis parahybae*: MNRJ 17955(13); *Neoplecostomus microps*: MNRJ 17963(10); MNRJ 17965(2); MNRJ 17966(10); MNRJ 17985(4); *Oligosarcus hepsetus*: MNRJ 14152(19); MNRJ 17928(3); MNRJ 17948(8); MNRJ 20729(1); MNRJ 24371(14); MNRJ 26021(1); MNRJ 26027(2); MNRJ 26028(3); MNRJ 27725(1); MNRJ 41733(48); *Phalloceros anisophallos*: MNRJ 17953(1); MNRJ 17960(14); MNRJ 17970(10); *Phalloceros harpagos*: MNRJ 17946(17); MNRJ 17952(80); MNRJ 17973(1); MNRJ 17981(1); *Phalloceros leptokeras*: MNRJ 17933(3); MNRJ 17935(12); MNRJ 17951(15); *Pimelodella lateristriga*: MNRJ 17962(1); MNRJ 17987(4); MNRJ 24375(5); MNRJ 25912(5); MNRJ 25925(1); *Pimelodus maculatus*: MNRJ 26147(1); *Rhamdia quelen*: MNRJ 12364(3); MNRJ 12365(2); MNRJ 12366(2); MNRJ 12367(10); MNRJ 12368(3); MNRJ 12369(2); MNRJ 12370(2); MNRJ 12373(3); MNRJ 12374(3); MNRJ 12375(1); MNRJ 24372(1); *Rineloricaria nigricauda*: MNRJ 17931(4); MNRJ 17941(5); MNRJ 17944(3); MNRJ 17956(1); MNRJ 17980(1); MNRJ 17984(3); MNRJ 24370(3); *Schizolecis guentheri*: MNRJ 17731(12); *Trachelyopterus striatulus*: MNRJ 25909(9); MNRJ 25924(4); MNRJ 26035(16); *Trichomycterus claudiae*: MNRJ 46121(1); MNRJ 46122(1); MNRJ 46123(9); MNRJ 46124(2); MNRJ 46125(26); *Xiphophorus helleri*: MNRJ 17932(30); MNRJ 17974(4); UNT 8965(7).

### **Microbacias do Rio de Janeiro**

Município de Rio de Janeiro

*Acentronichthys leptos*: MNRJ 39106(1); MNRJ 41178(1); *Ancistrus multispinis*: MNRJ 26591(2); MNRJ 26592(5); MNRJ 39105(10); MNRJ 39115(3); MNRJ 41177(1); *Atherinella brasiliensis*: MNRJ 25886(1); *Bathygobius soporator*: MNRJ



25889(9); *Callichthys callichthys*: MNRJ 25357(1); MNRJ 26416(2); MNRJ 26494(2); *Characidium grajahuense*: MNRJ 8858(1); MNRJ 15033(1); MNRJ 15045(2); MNRJ 39114(13); *Coptodon rendalli*: MNRJ 26420(1); MNRJ 26423(3); *Corydoras nattereri*: MNRJ 1099(36); MNRJ 6049(2); MNRJ 24140(1); *Crenicichla lepidota*: MNRJ 39112(2); MNRJ 41176(2); *Ctenogobius boleosoma*: MNRJ 25890(5); *Deuterodon janae*: MNRJ 8615(17); MNRJ 8846(1); MNRJ 8847(1); MNRJ 8848(1); MNRJ 8849(1); MNRJ 8850(1); MNRJ 8851(1); MNRJ 8929(27); MNRJ 8930(1); MNRJ 25019(21); MNRJ 25360(10); MNRJ 41180(6); MZUSP 17832(4); *Dormitator maculatus*: MNRJ 25344(7); MNRJ 26428(2); *Eleotris pisonis*: MNRJ 25343(4); MNRJ 25354(2); *Eucinostomus melanopterus*: MNRJ 25887(1); *Evorthodus lyricus*: MNRJ 25345(1); *Geophagus brasiliensis*: MNRJ 8550(3); MNRJ 24145(24); MNRJ 25022(1); MNRJ 25362(16); MNRJ 25417(2); MNRJ 25896(2); MNRJ 26437(1); MNRJ 26593(1); MNRJ 39108(7); MNRJ 39113(7); MNRJ 41185(10); MZUSP 44909(1); *Gymnotus carapo*: MNRJ 24137(1); *Hisonotus notatus*: MCZ 7764(79); MNRJ 24141(1); MNRJ 28882(5); MNRJ 42969(1); MZUSP 10317(28); MZUSP 23767(20); *Hoplias malabaricus*: MNRJ 20909(2); MNRJ 24134(1); MNRJ 25356(2); MNRJ 41181(1); MZUSP 23766(1); *Hyphessobrycon bifasciatus*: MNRJ 24133(12); MNRJ 26415(1); MNRJ 26489(1); *Hyphessobrycon boulengeri*: MNRJ 26422(2); MNRJ 26490(1); MZUSP 17831(1); *Hypleurochilus fissicornis*: MNRJ 25888(1); *Hypostomus punctatus*: MNRJ 24142(2); MNRJ 39110(11); MNRJ 41182(5); MNRJ 46447(1); USNM 41513(1); *Kryptolebias brasiliensis*: MNRJ 25021(9); MNRJ 25361(12); MNRJ 25895(1); *Kryptolebias caudomarginatus*: MNRJ 11396(41); MNRJ 19482(1); MNRJ 19489(6); MNRJ 24699(22); MNRJ 25349(10); MNRJ 25350(7); MNRJ 25351(4); MNRJ 25353(3); MNRJ 25384(2); MNRJ 25385(3); MNRJ 25388(1); MNRJ 25512(21); MNRJ 25513(8); MNRJ 26426(5); MNRJ 26427(4); MNRJ 29118(13); MNRJ 29119(12); ZUEC 4333(2); *Loricariichthys castaneus*: MNRJ 6337(1); USNM 41507(1); *Microglanis parahybae*: MNRJ 26189(1); *Mimagoniates microlepis*: MNRJ 25892(2); *Mugil liza*: MNRJ 26432(1); NPM 26495(1); Não identificada: MNRJ 6340(1); MNRJ 6341(1); MNRJ 6350(1); MNRJ 6351(1); *Notholebias minimus*: MNRJ 26421(5); MNRJ 26429(5); MNRJ 26431(2); MNRJ 26493(3); *Oligosarcus hepsetus*: MNRJ 24995(1); *Otocinclus affinis*: USNM 41521(1); *Otothyris lophophanes*: MCZ 47770(2); MNRJ 26190(1); MZUSP 8718(1); MZUSP 8719(1); MZUSP 8720(1); MZUSP 8721(1); MZUSP 8722(1); MZUSP 8723(1); MZUSP 8724(1); MZUSP 8725(1); MZUSP 8726(1); MZUSP 8727(1); MZUSP 8728(1); *Parotocinclus maculicauda*: MNRJ 24143(36); MZUSP 8680(1); MZUSP 10124(1); MZUSP 10125(1); MZUSP 10126(1); MZUSP 10127(1); MZUSP 10128(1); MZUSP 10129(1); MZUSP 10130(1); MZUSP 10131(1); MZUSP 10132(1); MZUSP 10133(1); MZUSP 10134(1); MZUSP 10135(1); MZUSP 10136(1); MZUSP 10137(1); MZUSP 10138(1); MZUSP 10139(1); MZUSP 10140(1); MZUSP 10141(1); MZUSP 10142(1); MZUSP 10143(1); MZUSP 10144(1); *Phalloceros anisophallos*: MNRJ 8519(19); MNRJ 24139(12); MNRJ 25415(2); MNRJ 41184(4); MZUSP 64207(11); MZUSP 123912(3); MZUSP 123917(3); MZUSP 123921(2); *Phalloceros leptokeras*: MNRJ 26434(7); *Phalloptychus januarius*: MNRJ 25386(9); MNRJ 26419(1); MNRJ 26424(19); MNRJ 26491(1); *Pimelodella lateristriga*: MNRJ 24135(1); *Poecilia reticulata*: MNRJ 24138(7); MNRJ 24698(32); MNRJ 25020(2); MNRJ 25342(1); MNRJ 25358(84); MNRJ 25416(4); MNRJ 25431(13); MNRJ 25894(1); MNRJ 26188(2); MNRJ 26418(1); MNRJ 26435(7); MNRJ 26587(5); MNRJ 26588(1); MNRJ 26589(41); MNRJ 26590(43); MNRJ 33540(4); MNRJ 33541(2); MNRJ 39107(48); MNRJ 39111(28); MNRJ 41179(49); MNRJ 41210(3); MZUSP 64138(16); *Poecilia vivipara*: MNRJ 11365(1); MNRJ 24700(1); MNRJ 25341(12); MNRJ 25352(17); MNRJ 25359(14); MNRJ 25387(42); MNRJ 26187(13); MNRJ 26417(2); MNRJ 26425(1); MNRJ 26430(1); MNRJ 26492(3); MNRJ 29117(13); *Rhamdia quelen*: MNRJ 24136(1); MNRJ 25414(5); MNRJ 25893(1); MNRJ 39109(1); *Rineloricaria nigricauda*: MNRJ 24144(1); *Rineloricaria zawadzki*: MNRJ 9853(1); *Scleromystax barbatus*: MZUSP 27029(2); *Synbranchus marmoratus*: MNRJ 26594(1); MNRJ 41183(1); *Trichomycterus giganteus*: MNRJ 26436(13); MZUSP 35028(4); UFRJ 5399(4); UFRJ 5730(10); UFRJ 5732(2); UFRJ 5733(2); UFRJ 5999(1);

## **Microbacias do Rio de Janeiro**

Município de Seropédica

*Astyanax lacustris*: MNRJ 24093(6); MNRJ 52085(34); MZUSP 27873(1); MZUSP 27874(1); *Australoheros oblongus*: MZUSP 27867(1); MZUSP 27868(1); NPM 6829(1); *Callichthys callichthys*: MNRJ 25655(1); MNRJ 25745(3); MNRJ 25747(3); MNRJ 52081(1); MZUSP 125634(1); NPM 6832(2); *Characidium interruptum*: MNRJ 52092(3); *Coptodon rendalli*: MNRJ 8913(1); MNRJ 24101(1); MZUSP 125635(2); *Corydoras nattereri*: MNRJ 17557(1); MNRJ 20047(13); MNRJ 25762(1); *Crenicichla lepidota*: MNRJ 24099(18); *Cyphocharax gilbert*: MZUSP 21494(1); MZUSP 28271(1); *Deuterodon hastatus*: MNRJ 11064(23); MNRJ 11065(7); MNRJ 24094(167); MNRJ 25754(6); MNRJ 25790(5); MNRJ 25791(11); MZUSP 28273(2); MZUSP 125632(1); *Geophagus brasiliensis*: MNRJ 17558(5); MNRJ 21167(2); MNRJ 24100(3); MNRJ 52082(13); MZUSP 27861(1); MZUSP 27862(1); MZUSP 28287(5); MZUSP 28288(3); *Gymnotus carapo*: MNRJ 24096(2); *Hisonotus notatus*: MNRJ 8520(1); MNRJ 52091(1); *Hoplerethrinus unitaeniatus*: MNRJ 25748(1); *Hoplias malabaricus*: MNRJ 19436(1); MNRJ 24092(2); MNRJ 52087(1); MZUSP 125631(5); NPM 6831(3); *Hoplosternum littorale*: MNRJ 24102(1); MNRJ 43258(1); MZUSP 125630(2); NPM 6545(10); NPM 6830(5); *Hyphessobrycon bifasciatus*: NPM 6544(8); *Hyphessobrycon boulengeri*: MNRJ 52086(15); *Hyphessobrycon flammeus*: MNRJ 19512(20); MNRJ 19543(20); *Hypostomus punctatus*: MNRJ 8521(1); MNRJ 24103(1); MNRJ 43256(1); MNRJ

52083(2); MZUSP 24669(3); MZUSP 27859(1); MZUSP 85767(4); *Leptopanchax opalescens*: MNRJ 51967(7); *Loricariichthys castaneus*: MNRJ 43257(1); MZUSP 24670(1); MZUSP 47892(1); *Microglanis parahybae*: MNRJ 18010(1); USNM 257361(11); *Mimagoniates microlepis*: MNRJ 19515(2); MNRJ 19546(2); MNRJ 21168(8); MZUSP 19501(1); *Mugil curema*: MZUSP 44942(1); Não identificada: MNRJ 6033(1); MNRJ 6039(2); *Notholebias minimus*: MNRJ 11286(55); MNRJ 11287(4); MNRJ 11288(10); MNRJ 19472(21); MNRJ 19554(29); MNRJ 19556(15); MZUSP 36296(11); MZUSP 36301(3); MZUSP 38444(1); MZUSP 38445(1); MZUSP 91512(3); MZUSP 125633(7); ZUEC 2081(1); ZUEC 2082(1); ZUEC 4877(3); *Oligosarcus hepsetus*: MNRJ 24095(2); MZUSP 27876(1); *Otocinclus affinis*: MNRJ 4737(1); *Otothyris lophophanes*: MNRJ 4711(1); *Parotocinclus maculicauda*: MNRJ 24104(13); MNRJ 52090(3); NPM 6548(2); *Phalloceros anisophallos*: MNRJ 21505(38); MNRJ 43114(22); MNRJ 52088(1); NPM 6834(18); *Pimelodella lateristriga*: MNRJ 11283(2); MNRJ 52080(4); MZUSP 28272(1); *Poecilia reticulata*: MNRJ 24098(1); MNRJ 25763(21); MNRJ 52089(10); MZUSP 125636(10); NPM 6546(9); NPM 6547(35); NPM 6833(12); *Poecilia vivipara*: MNRJ 20034(24); MNRJ 24097(21); *Rhamdia quelen*: MNRJ 25756(3); MZUSP 28289(2); MZUSP 28290(1); MZUSP 44941(1); *Rineloricaria zawadzki*: MCP 11561(2); MNRJ 26439(5); MNRJ 52084(11); MZUSP 27879(1); MZUSP 27880(1); MZUSP 27881(1); MZUSP 27882(1); *Spintherobolus broccae*: MNRJ 19437(3); ZUEC 3620(5); *Trachelyopterus striatulus*: MZUSP 59026(1).

#### **Bacia do Rio Paraíba do Sul**

Município de Engenheiro Paulo de Frontin

*Hypostomus luetkeni*: MCP 43301(6); UFRGS 20100(2); *Rhamdia quelen*: UFRGS 20103(5);

#### **Bacia do Rio Paraíba do Sul**

Município de Mendes

*Deuterodon intermedius*: MNRJ 39331(4); MNRJ 39334(5); MNRJ 39342(1); *Hoplias malabaricus*: MNRJ 39341(1); *Imparfinis minutus*: MNRJ 39332(2); MNRJ 39335(1); *Neoplecostomus microps*: MNRJ 39338(1); *Phalloceros harpagos*: MNRJ 39340(1); *Rhamdia quelen*: MNRJ 39336(1); MNRJ 39343(3); *Rineloricaria nigricauda*: DZSJRP 12517(1); MNRJ 39333(4); MNRJ 39339(12); *Scleromystax barbatus*: MNRJ 39337(4); MNRJ 39344(6).

#### **Bacia do Rio Paraíba do Sul**

Município de Piraí

*Astyanax lacustris*: MNRJ 35446(1); *Crenicichla lacustris*: MNRJ 25014(6); MNRJ 25014(6); *Deuterodon giton*: DZSJRP 12523(1); MNRJ 25001(18); *Deuterodon heterostomus*: MNRJ 28423(3); *Deuterodon taeniatus*: MNRJ 25003(26); *Geophagus brasiliensis*: MNRJ 23323(8); MNRJ 25009(6); MNRJ 25010(15); *Gymnotus carapo*: MNRJ 25011(7); *Hoplias malabaricus*: MNRJ 25015(1); MNRJ 35447(1); *Hoplosternum littorale*: MNRJ 20026(3); MNRJ 28422(5); *Hyphessobrycon bifasciatus*: MNRJ 25005(44); MNRJ 25018(3); *Hyphessobrycon eques*: MNRJ 25006(70); *Hypomasticus mormyrops*: MNRJ 28418(1); *Hypostomus luetkeni*: DZSJRP 12526(1); *Loricariichthys castaneus*: MNRJ 35445(1); Não identificada: MNRJ 4499(1); MNRJ 4500(3); MNRJ 4502(1); MNRJ 4503(1); *Oligosarcus hepsetus*: MNRJ 22306(1); MNRJ 25007(13); MNRJ 25012(26); MNRJ 35448(1); *Pachyurus adspersus*: MNRJ 28419(1); *Phalloceros harpagos*: DZSJRP 12527(2); *Phalloceros leptokeras*: MNRJ 25008(3); *Pimelodus maculatus*: MNRJ 28420(1); MNRJ 28421(1); *Psalidodon parahybae*: MNRJ 4501(1); MNRJ 25002(7); MNRJ 25004(3); MNRJ 25016(3); *Rhamdia quelen*: MNRJ 25017(1); *Rineloricaria nigricauda*: DZSJRP 12525(6); MNRJ 25013(3); *Rineloricaria steindachneri*: MNRJ 21671(3).

#### **Bacia do Rio Paraíba do Sul**

Município de Rio Claro

*Australoheros ipatinguensis*: DZSJRP 12543(3); MNRJ 38060(2); MNRJ 43780(1); *Brycon opalinus*: MNRJ 38022(3); MNRJ 41281(1); MNRJ 46701(1); MNRJ 47259(25); *Characidium grajahuense*: MZUSP 110268(3); *Characidium lauroi*: MNRJ 12246(1); MNRJ 12247(11); MNRJ 36426(18); MNRJ 36438(1); MNRJ 36451(3); MNRJ 36457(1); MNRJ 36458(3); MNRJ 36471(1); MNRJ 36472(32); MNRJ 36486(1); MNRJ 36497(1); MNRJ 36507(10); MNRJ 36508(50); MNRJ 36518(6); MNRJ 37977(1); MNRJ 37989(32); MNRJ 38000(4); MNRJ 38018(14); MNRJ 38019(81); MNRJ 38031(13); MNRJ 38032(13); MNRJ 38039(10); MNRJ 38045(25); MNRJ 39355(2); MNRJ 43748(39); MNRJ 43758(37); MNRJ 43759(5); MNRJ 43767(1); MNRJ 43806(18); MNRJ 43807(7); MNRJ 43821(3); MNRJ 43864(21); MNRJ 43865(1); MNRJ 46636(2); MNRJ 46650(8); MNRJ 46665(3); MNRJ 46668(73); MNRJ 46690(25); MNRJ 46702(20); MNRJ 46822(3); MNRJ 47023(1); MNRJ 47260(29); MNRJ 47261(14); MZUSP 110267(5); MZUSP 110301(4); MZUSP 110338(7); *Coptodon rendalli*: DZSJRP 12537(1); MNRJ 38512(1); MZUSP 110344(8); *Crenicichla lacustris*: MNRJ 43779(5); MNRJ 47010(6); *Deuterodon giton*: DZSJRP 12540(1); MBML 10335(2); MNRJ 17967(1); MNRJ 19379(81); MNRJ 37834(1);

MNRJ 37835(20); MNRJ 37974(5); MNRJ 37986(2); MNRJ 38021(5); MNRJ 50724(1); MNRJ 50819(1); MNRJ 50820(2); *Deuterodon intermedius*: MNRJ 19391(8); MNRJ 36427(1); MNRJ 36428(14); MNRJ 36439(15); MNRJ 36447(7); MNRJ 36459(15); MNRJ 36473(21); MNRJ 36487(21); MNRJ 36498(29); MNRJ 36510(81); MNRJ 36519(51); MNRJ 36524(22); MNRJ 37954(5); MNRJ 37965(28); MNRJ 37978(34); MNRJ 37987(15); MNRJ 38001(58); MNRJ 38014(98); MNRJ 38020(51); MNRJ 38033(42); MNRJ 38040(19); MNRJ 38053(10); MNRJ 38087(31); MNRJ 39354(15); MNRJ 43749(79); MNRJ 43755(58); MNRJ 43766(74); MNRJ 43805(19); MNRJ 43820(15); MNRJ 43862(12); MNRJ 43863(5); MNRJ 46631(20); MNRJ 46643(95); MNRJ 46651(242); MNRJ 46658(35); MNRJ 46689(23); MNRJ 46699(8); MNRJ 46713(15); MNRJ 46781(26); MNRJ 46791(10); MNRJ 46813(92); MNRJ 47002(13); MNRJ 47014(6); MNRJ 47252(15); MNRJ 47257(91); MNRJ 52430(6); MNRJ 52431(10); MNRJ 52432(2); MNRJ 52435(3); MNRJ 52436(11); MNRJ 52440(8); MNRJ 52441(9); MNRJ 52443(2); MNRJ 52444(5); MZUSP 110297(1); MZUSP 110303(28); MZUSP 110305(1); MZUSP 110337(39); *Geophagus brasiliensis*: DZSJRP 12535(1); MNRJ 17978(4); MNRJ 17988(2); MNRJ 36470(38); MNRJ 36484(7); MNRJ 36496(3); MNRJ 36506(3); MNRJ 37963(14); MNRJ 37973(16); MNRJ 37985(4); MNRJ 37998(1); MNRJ 38009(5); MNRJ 38030(5); MNRJ 38061(10); MNRJ 43753(11); MNRJ 43764(53); MNRJ 43778(20); MNRJ 43810(17); MNRJ 43829(57); MNRJ 43872(14); MNRJ 46649(2); MNRJ 46667(2); MNRJ 46709(40); MNRJ 46720(31); MNRJ 46787(37); MNRJ 46801(67); MNRJ 46819(3); MNRJ 47011(16); MNRJ 47021(30); MNRJ 47230(1); MNRJ 47264(4); MZUSP 110341(1); *Gymnotus carapo*: DZSJRP 12539(1); MNRJ 37961(1); MNRJ 38054(9); MNRJ 43777(2); MNRJ 43809(11); MNRJ 43827(4); MNRJ 46635(6); MNRJ 46648(2); MNRJ 46663(4); MNRJ 46718(2); MNRJ 46786(9); MNRJ 46799(8); MNRJ 46828(2); MNRJ 47008(1); MNRJ 47019(2); MZUSP 110336(1); *Harttia carvalhoi*: MNRJ 36430(4); MNRJ 36441(4); MNRJ 36461(3); MNRJ 36480(9); MNRJ 36501(3); MNRJ 36515(2); MNRJ 37969(5); MNRJ 37996(8); MNRJ 38006(18); MNRJ 38026(15); MNRJ 38036(3); MNRJ 38057(1); MNRJ 43816(2); MNRJ 43823(4); MNRJ 46641(2); MNRJ 46666(2); MNRJ 46826(1); MNRJ 47022(2); *Harttia loricariformis*: MNRJ 17940(1); MNRJ 36514(1); MNRJ 37995(1); MNRJ 38005(1); MNRJ 38037(1); MNRJ 43773(4); MNRJ 44583(1); MNRJ 46646(2); MNRJ 46706(4); MNRJ 46827(1); MNRJ 47262(1); MZUSP 110295(1); MZUSP 110346(1); *Hemipsilichthys gobio*: MNRJ 36482(1); MNRJ 39361(1); MNRJ 43868(1); MZUSP 110266(3); MZUSP 110298(3); *Hemipsilichthys papillatus*: MNRJ 36448(1); MNRJ 39362(1); MNRJ 46657(1); MNRJ 52437(1); MNRJ 52438(1); *Hoplias malabaricus*: DZSJRP 12528(1); MNRJ 38051(1); MNRJ 43830(1); MNRJ 46802(1); MNRJ 47013(1); *Hypomasticus mormyrops*: MNRJ 46698(3); MNRJ 47001(1); MNRJ 47012(1); MNRJ 47256(1); *Hypostomusluetkeni*: DZSJRP 12533(6); MNRJ 21597(1); MNRJ 36502(1); MNRJ 37958(1); MNRJ 38062(1); MNRJ 43781(2); MNRJ 43824(3); MNRJ 44584(1); MNRJ 46632(1); MNRJ 46710(1); MNRJ 46723(4); MNRJ 46803(1); MNRJ 46820(1); MNRJ 46821(1); MNRJ 47007(1); MZUSP 110293(1); *Imparfinis minutus*: MNRJ 36464(2); MNRJ 36476(5); MNRJ 36491(1); MNRJ 36511(1); MNRJ 37956(1); MNRJ 37967(2); MNRJ 37980(2); MNRJ 37990(1); MNRJ 38024(3); MNRJ 38056(2); MNRJ 43770(5); MNRJ 43822(3); MNRJ 46637(2); MNRJ 46703(5); MNRJ 46721(1); MNRJ 46788(1); MNRJ 46793(6); MNRJ 47004(3); *Neoplecostomus microps*: DZSJRP 12538(3); MNRJ 17982(10); MNRJ 36431(23); MNRJ 36442(13); MNRJ 36449(8); MNRJ 36454(6); MNRJ 36462(17); MNRJ 36481(27); MNRJ 36489(14); MNRJ 36516(27); MNRJ 36521(8); MNRJ 36526(1); MNRJ 37960(4); MNRJ 37971(9); MNRJ 37983(8); MNRJ 37993(34); MNRJ 38008(20); MNRJ 38013(13); MNRJ 38017(21); MNRJ 38028(47); MNRJ 38038(15); MNRJ 38043(17); MNRJ 38049(9); MNRJ 38089(6); MNRJ 39363(5); MNRJ 43751(21); MNRJ 43761(43); MNRJ 43774(10); MNRJ 43808(38); MNRJ 43825(118); MNRJ 43869(5); MNRJ 46633(11); MNRJ 46647(8); MNRJ 46653(20); MNRJ 46662(18); MNRJ 46691(3); MNRJ 46708(18); MNRJ 46785(6); MNRJ 46797(2); MNRJ 46816(14); MNRJ 47006(4); MNRJ 47017(5); MNRJ 47254(10); MNRJ 47263(12); MNRJ 52433(2); MNRJ 52434(1); MNRJ 52445(2); MZUSP 110265(19); MZUSP 110292(7); MZUSP 110302(5); MZUSP 110304(1); MZUSP 110339(4); *Oligosarcus hepsetus*: MNRJ 36429(12); MNRJ 36440(2); MNRJ 36460(2); MNRJ 36474(2); MNRJ 36488(1); MNRJ 36499(5); MNRJ 36509(3); MNRJ 37966(2); MNRJ 37979(1); MNRJ 37988(1); MNRJ 38002(3); MNRJ 38023(3); MNRJ 38034(16); MNRJ 38052(2); MNRJ 43768(6); MNRJ 43812(6); MNRJ 46644(1); MNRJ 46659(3); MNRJ 46700(5); MNRJ 46714(13); MNRJ 46782(16); MNRJ 46792(21); MNRJ 46814(1); MNRJ 47003(15); MNRJ 47015(9); MNRJ 47258(2); MZUSP 110296(1); MZUSP 110340(5); MNRJ 36485(3); MNRJ 37964(3); *Pareiorhina rudolphi*: MNRJ 36455(72); MNRJ 36522(24); MNRJ 38012(1); MNRJ 38016(7); MNRJ 38042(64); MNRJ 38048(112); MNRJ 46652(34); MNRJ 46670(141); MNRJ 46692(58); MNRJ 46835(40); *Phalloceros harpagos*: DZSJRP 12534(4); DZSJRP 12542(25); MNRJ 17977(8); MNRJ 17979(93); MNRJ 36437(29); MNRJ 36446(1); MNRJ 36450(2); MNRJ 36456(84); MNRJ 36469(3); MNRJ 36483(11); MNRJ 36495(4); MNRJ 36505(15); MNRJ 36517(5); MNRJ 36523(70); MNRJ 36527(61); MNRJ 37962(39); MNRJ 37972(5); MNRJ 37984(4); MNRJ 37997(36); MNRJ 38010(1); MNRJ 38029(1); MNRJ 38044(136); MNRJ 38050(43); MNRJ 38059(16); MNRJ 38090(67); MNRJ 38511(21); MNRJ 39364(12); MNRJ 40703(33); MNRJ 40705(19); MNRJ 40706(21); MNRJ 40707(46); MNRJ 40708(16); MNRJ 43708(38); MNRJ 43722(199); MNRJ 43752(417); MNRJ 43762(294); MNRJ 43775(40); MNRJ 43811(34); MNRJ 43828(241); MNRJ 43871(13); MNRJ 46642(4); MNRJ 46655(157); MNRJ 46664(6);

MNRJ 46671(110); MNRJ 46693(33); MNRJ 46711(3); MNRJ 46719(2); MNRJ 46800(7); MNRJ 46818(7); MNRJ 46836(158); MNRJ 47009(3); MNRJ 47020(29); MNRJ 47231(8); MNRJ 47255(29); MNRJ 52442(8); UNT 9698(10); *Phalloptychus januarius*: DZSJRP 12541(3); *Pimelodella lateristriga*: MNRJ 36434(1); MNRJ 36465(1); MNRJ 36492(1); MNRJ 38055(4); MNRJ 43815(1); MNRJ 43831(1); MNRJ 46639(1); MNRJ 46704(2); MNRJ 46715(4); MNRJ 46823(1); *Poecilia reticulata*: MNRJ 43763(266); MNRJ 43776(1); *Poecilia vivipara*: DZSJRP 12529(1); DZSJRP 12530(78); *Rhamdia quelen*: DZSJRP 12536(1); MNRJ 36433(1); MNRJ 36466(7); MNRJ 36475(3); MNRJ 36493(1); MNRJ 36500(1); MNRJ 37955(1); MNRJ 37981(4); MNRJ 37991(1); MNRJ 43769(2); MNRJ 46638(2); MNRJ 46660(4); MNRJ 46705(2); MNRJ 46716(2); MNRJ 46789(1); MNRJ 46794(5); MNRJ 46815(1); MNRJ 47016(3); MZUSP 110345(1); *Rineloricaria nigricauda*: MNRJ 17958(5); MNRJ 37994(8); MNRJ 38058(10); MNRJ 43771(84); MNRJ 43817(2); MNRJ 43826(23); MNRJ 43870(10); MNRJ 46634(10); MNRJ 46661(2); MNRJ 46707(6); MNRJ 46717(58); MNRJ 46784(2); MNRJ 46817(4); MNRJ 47005(36); MNRJ 47018(14); *Rineloricaria zawadzki*: DZSJRP 12532(27); MNRJ 21595(1); MNRJ 36432(5); MNRJ 36443(1); MNRJ 36463(7); MNRJ 36479(1); MNRJ 36490(7); MNRJ 36503(10); MNRJ 37959(12); MNRJ 37970(2); MNRJ 37982(4); MNRJ 38007(2); MNRJ 38027(3); MNRJ 46798(16); MZUSP 105262(2); MZUSP 105263(2); MZUSP 110294(2); MZUSP 110342(11); *Scleromystax barbatus*: DZSJRP 12531(2); MNRJ 46722(4); *Trichomycterus auroguttatus*: MZUSP 110300(2); MZUSP 110343(9); *Trichomycterus claudiae*: UFRJ 5684(9); UFRJ 5685(3); UFRJ 6027(1); *Trichomycterus macrophthalmus*: MNRJ 36435(1); MNRJ 36444(2); MNRJ 36467(1); MNRJ 36478(4); MNRJ 36494(16); MNRJ 36504(12); MNRJ 36513(4); MNRJ 37957(6); MNRJ 37999(1); MNRJ 38004(5); MNRJ 43750(22); MNRJ 43760(27); MNRJ 43772(13); MNRJ 43813(2); MNRJ 43832(1); MNRJ 43866(1); MNRJ 43867(17); MNRJ 46790(3); MNRJ 46795(1); MNRJ 46824(1); MNRJ 48906(2); *Trichomycterus mariamole*: MNRJ 36452(2); MNRJ 36520(1); MNRJ 36525(2); MNRJ 38047(1); MNRJ 38088(3); MNRJ 39365(1); MNRJ 46656(2); MNRJ 47024(1); *Trichomycterus nigroauratus*: MNRJ 36436(1); MNRJ 36445(16); MNRJ 36453(11); MNRJ 36468(3); MNRJ 36477(3); MNRJ 36512(2); MNRJ 37968(5); MNRJ 37992(1); MNRJ 38003(30); MNRJ 38011(1); MNRJ 38015(16); MNRJ 38025(3); MNRJ 38035(2); MNRJ 38041(7); MNRJ 38046(2); MNRJ 38091(1); MNRJ 43719(5); MNRJ 43754(1); MNRJ 43814(2); MNRJ 43833(2); MNRJ 46640(6); MNRJ 46645(3); MNRJ 46654(10); MNRJ 46669(11); MNRJ 46694(1); MNRJ 46712(2); MNRJ 46783(25); MNRJ 46796(2); MNRJ 46825(1); MNRJ 46834(6); MNRJ 47025(1); MNRJ 47026(1); MNRJ 47253(13); MNRJ 52439(1); MZUSP 110264(2); MZUSP 110269(4); MZUSP 110270(3); MZUSP 110299(5); MZUSP 110306(4).

### **RH-3 Região Hidrográfica Médio Paraíba do Sul**

#### **Bacia do Rio Paraíba do Sul**

Município de Barra do Piraí

*Australoheros ipatinguensis*: MCP 11702(1); MCP 11704(1); MNRJ 52303(18); *Callichthys callichthys*: MNRJ 4740(1); *Deuterodon giton*: MNRJ 17826(1); MNRJ 17876(1); MNRJ 20745(6); *Deuterodon intermedius*: MNRJ 20684(1); MNRJ 20746(1); MNRJ 52305(6); *Deuterodon taeniatatus*: MNRJ 17877(1); MNRJ 52310(5); *Eigenmannia virescens*: MCP 11694(2); *Geophagus brasiliensis*: MCP 11709(3); MNRJ 52304(17); MNRJ 52309(1); *Harttia loricariformis*: MCP 11707(2); *Hoplias malabaricus*: MCP 11710(1); MNRJ 52307(1); *Hypostomus luetkeni*: MCP 11687(1); MNRJ 4742(1); Não identificada: MNRJ 4741(1); MNRJ 5987(1); *Oligosarcus hepsetus*: MNRJ 52306(1); *Pachyurus adspersus*: MCP 48382(4); *Phalloceros leptokeras*: MNRJ 43902(34); MNRJ 52301(87); *Pimelodus maculatus*: MNRJ 20748(2); *Poecilia reticulata*: MCP 11700(8); MCP 13474(13); MNRJ 52302(5); *Psalidodon parahybae*: MCP 13475(3); MCP 13477(8); MCP 14581(9); MNRJ 20740(1); *Rineloricaria nigricauda*: MCP 11706(1); MNRJ 17889(1); MNRJ 52300(60); *Trichomycterus florensis*: MNRJ 3724(2); MNRJ 3751(1); *Trichomycterus travassosi*: MNRJ 52308(3).

#### **Bacia do Rio Paraíba do Sul**

Município de Barra Mansa

*Astyanax lacustris*: MCP 44581(2); MNRJ 17875(5); MNRJ 19661(11); MNRJ 46092(6); MNRJ 46100(12); *Deuterodon giton*: MNRJ 17878(1); MNRJ 20739(2); MNRJ 20747(1); MNRJ 46083(1); MNRJ 46086(5); MNRJ 46089(11); MNRJ 46095(1); *Deuterodon heterostomus*: MNRJ 17874(1); MNRJ 17918(5); MNRJ 46085(6); MNRJ 46091(16); MNRJ 46093(4); MNRJ 46094(1); *Deuterodon intermedius*: MCP 44578(2); MNRJ 17890(1); MNRJ 19664(3); MNRJ 20741(2); MNRJ 46097(2); MNRJ 47079(2); *Geophagus brasiliensis*: MNRJ 19643(18); *Hoplosternum littorale*: MNRJ 25231(2); MNRJ 25232(1); *Imparfinis minutus*: MNRJ 19673(1); *Oligosarcus hepsetus*: MNRJ 19646(6); *Pogonopoma parahybae*: MNRJ 17348(1); *Psalidodon parahybae*: MNRJ 18018(2); MNRJ 46084(4); MNRJ 46087(1); MNRJ 46088(5); MNRJ 46096(2); *Rineloricaria zawadzki*: DZSJRP 12544(4); MNRJ 19688(5); MZUSP 105264(5); *Steindachneridion parahybae*: MZUSP 100924(1); *Trichomycterus nigroauratus*: DZSJRP 12545(16).

#### **Bacia do Rio Paraíba do Sul**

Município de Comendador Levy Gasparian  
*Hypostomus luetkeni*: MNRJ 33606(1).

MBML 969(4);

#### **Bacia do Rio Paraíba do Sul**

Município de Itatiaia

*Astyanax lacustris*: MBML 969(4); MNRJ 41296(1); MNRJ 45442(1); *Australoheros ipatinguensis*: DZSJRP 22878(2); MNRJ 32713(7); MNRJ 43058(2); *Australoheros oblongus*: MCP 42658(3); *Brycon insignis*: MNRJ 47222(1); *Brycon opalinus*: MNRJ 11254(1); *Callichthys callichthys*: MNRJ 41287(1); *Characidium lauroi*: DZSJRP 22879(4); DZSJRP 22880(7); DZSJRP 22887(12); MNRJ 5529(1); MNRJ 5530(1); MNRJ 5959(2); MNRJ 6316(2); MNRJ 6317(5); MNRJ 32702(5); MNRJ 32703(9); MNRJ 43054(14); MNRJ 43059(5); MNRJ 43063(15); UFRJ 616(1); ZUEC 5559(1); *Crenicichla lacustris*: MCP 47960(1); MCP 48002(1); MNRJ 45444(11); MNRJ 45447(2); *Deuterodon giton*: MNRJ 4786(11); MNRJ 48326(1); MNRJ 49306(2); *Deuterodon heterostomus*: MNRJ 10942(3); *Deuterodon intermedius*: DZSJRP 22877(1); MNRJ 32701(26); MNRJ 39391(14); MNRJ 43053(2); ZUEC 5560(5); *Eigenmannia virescens*: MNRJ 45450(1); *Geophagus brasiliensis*: DZSJRP 22881(1); MBML 973(1); MNRJ 6313(1); MNRJ 43062(1); MNRJ 45451(10); *Glanidium melanopteron*: MNRJ 45416(1); *Gymnotus carapo*: MNRJ 32712(1); MNRJ 45446(1); *Hisonotus notatus*: MNRJ 12837(2); *Hoplias malabaricus*: MNRJ 4782(1); *Hoplosternum littorale*: MNRJ 32711(1); *Hypomasticus mormyrops*: MBML 974(2); *Hypostomus luetkeni*: MNRJ 32708(1); *Imparfinis piperatus*: MNRJ 32705(4); Não identificada: MNRJ 4811(1); MNRJ 4831(5); MNRJ 4832(2); MNRJ 4833(10); MNRJ 4864(13); MZUSP 91560(1); *Neoplecostomus microps*: DZSJRP 20342(4); DZSJRP 20346(5); DZSJRP 20355(1); DZSJRP 22875(2); DZSJRP 22882(6); MNRJ 26530(5); MNRJ 41752(3); MNRJ 43055(31); MZUSP 77341(1); MZUSP 108828(1); UFMT 2437(10); *Oligosarcus hepsetus*: MBML 972(5); MNRJ 4892(2); *Pachyurus adpersus*: MBML 971(4); *Pareiorhina brachyrhyncha*: DZSJRP 22883(18); MNRJ 43056(32); *Pareiorhina rudolphi*: DZSJRP 20343(28); DZSJRP 20347(19); DZSJRP 20349(8); DZSJRP 20356(94); DZSJRP 21381(10); DZSJRP 22868(5); DZSJRP 22869(14); DZSJRP 22870(11); DZSJRP 22871(2); DZSJRP 22872(5); DZSJRP 22874(2); DZSJRP 22888(1); MNRJ 5764(2); MNRJ 13560(52); MNRJ 16737(1); MNRJ 23833(6); MNRJ 24080(26); MNRJ 24081(1); MNRJ 24084(6); MNRJ 26529(82); MNRJ 39120(5); MNRJ 41753(53); MZUSP 35818(6); MZUSP 87822(2); MZUSP 114647(1); ZUEC 1719(1); ZUEC 1720(1); ZUEC 6231(1); ZUEC 6270(3); ZUEC 6277(1); ZUEC 7611(4); ZUEC 7613(3); ZUEC 7615(4); *Phalloceros harpagos*: DZSJRP 20345(4); DZSJRP 20348(9); DZSJRP 20357(4); MNRJ 24082(3); MNRJ 26531(112); MNRJ 32709(1); MNRJ 39394(29); MNRJ 41754(4); MNRJ 43061(1); MNRJ 45449(10); UFMT 2436(7); ZUEC 7659(5); ZUEC 9798(7); *Pimelodella lateristriga*: MNRJ 47113(1); *Pimelodus maculatus*: MBML 970(10); *Poecilia reticulata*: MNRJ 45445(33); MNRJ 45448(91); *Psalidodon parahybae*: MBML 975(19); MNRJ 3336(7); MNRJ 4785(3); MNRJ 26528(9); MNRJ 32710(2); MNRJ 45443(1); *Rhamdia quelen*: MNRJ 8502(1); MNRJ 32704(1); *Rineloricaria nigricauda*: DZSJRP 22884(1); MNRJ 32707(15); MNRJ 43060(1); *Steindachneridion parahybae*: MNRJ 12234(1); *Trichomycterus albinotatus*: DZSJRP 21382(1); MNRJ 24079(8); MNRJ 24083(9); MNRJ 39393(7); MZUSP 35817(6); MZUSP 42312(1); MZUSP 42315(3); MZUSP 67904(2); UFRJ 547(8); UFRJ 583(2); UFRJ 593(4); UFRJ 594(1); ZUEC 6059(1); ZUEC 6176(8); ZUEC 6248(1); ZUEC 6249(6); ZUEC 6257(1); ZUEC 6279(1); ZUEC 9797(4); *Trichomycterus auroguttatus*: MNRJ 26532(1); MNRJ 26533(2); MNRJ 26534(2); MNRJ 39119(5); MNRJ 39392(4); MZUSP 43341(1); MZUSP 43342(4); MZUSP 84191(1); MZUSP 108827(2); UFRJ 640(2); UFRJ 4556(1); UFRJ 4558(2); UFRJ 11673(6); UFRJ 11675(15); ZUEC 6060(10); ZUEC 7612(2); ZUEC 7614(15); ZUEC 7616(9); ZUEC 7617(14); ZUEC 9799(1); *Trichomycterus itatiayae*: DZSJRP 20344(2); DZSJRP 22873(3); DZSJRP 22876(1); DZSJRP 22885(8); DZSJRP 22886(1); MNRJ 792(1); MNRJ 5761(2); MNRJ 5946(1); MNRJ 6041(7); MNRJ 11346(1); MNRJ 11347(1); MNRJ 11497(19); MNRJ 32706(7); MNRJ 42293(2); ZUEC 1721(1); ZUEC 1722(1); ZUEC 2076(1); ZUEC 2077(1); ZUEC 5558(2); ZUEC 5812(3); ZUEC 5813(2); ZUEC 6247(3); ZUEC 6254(1); ZUEC 6256(2); ZUEC 6269(1); ZUEC 6278(1); ZUEC 6280(2); ZUEC 6284(1); ZUEC 6285(1); ZUEC 6286(2); ZUEC 6287(1); ZUEC 6288(2); ZUEC 6292(1); ZUEC 6293(1); *Trichomycterus mirissumba*: MNRJ 9380(4); MNRJ 39118(1); MZUSP 87821(29); MZUSP 87829(10); MZUSP 114631(1); UFRJ 546(2); UFRJ 4729(12); UFRJ 4730(5); ZUEC 6061(1); ZUEC 6063(2); ZUEC 6066(2); ZUEC 6067(1); ZUEC 6253(3); MNRJ 43064(1); UFRJ 590(2); UFRJ 597(2); ZUEC 6283(1); *Trichomycterus travassosi*: MNRJ 5424(1); MNRJ 15432(1); MNRJ 43057(11).

#### **Bacia do Rio Paraíba do Sul**

Município de Miguel Pereira

*Australoheros oblongus*: MZUSP 74005(1); MZUSP 74015(1); MZUSP 74010(1).

#### **Bacia do Rio Paraíba do Sul**

#### Município de Paraíba do Sul

*Astyanax lacustris*: MNRJ 4746(1); *Loricariichthys castaneus*: DZSJRP 21126(5); *Oligosarcus hepsetus*: MNRJ 4745(1).

#### Bacia do Rio Paraíba do Sul

##### Município de Paty do Alferes

*Australoheros ipatinguensis*: MNRJ 15109(4); *Deuterodon intermedius*: MNRJ 17856(6); *Geophagus brasiliensis*: MNRJ 5237(1); MNRJ 15107(13); *Hypostomus luetkeni*: MNRJ 20894(4); *Phalloceros harpagos*: MNRJ 20035(1); *Poecilia reticulata*: MNRJ 5238(26); *Rineloricaria nigricauda*: MNRJ 15743(6).

#### Bacia do Rio Paraíba do Sul

##### Município de Pinheiral

*Astyanax lacustris*: MNRJ 46090(2); *Hypomasticus copelandii*: MNRJ 47117(1);

#### Bacia do Rio Paraíba do Sul

##### Município de Porto Real

*Astyanax lacustris*: MNRJ 41289(18); MNRJ 41742(1); *Coptodon rendalli*: MNRJ 25952(1); MNRJ 25953(1); *Crenicichla lacustris*: MNRJ 41751(1); *Deuterodon intermedius*: MNRJ 11035(1); MNRJ 11050(2); MNRJ 11051(1); MNRJ 25942(29); MNRJ 41743(5); *Geophagus brasiliensis*: MNRJ 19124(2); MNRJ 25951(1); MNRJ 41750(1); *Gymnotus carapo*: MNRJ 25948(2); *Harttia loricariformis*: MNRJ 14069(2); *Hoplerythrinus unitaeniatus*: MNRJ 25941(1); *Hoplosternum littorale*: MNRJ 25947(9); *Hyphessobrycon bifasciatus*: MNRJ 25944(5); *Hyphessobrycon eques*: MNRJ 25945(23); *Hypostomus vermicularis*: MNRJ 41746(3); MNRJ 49031(1); MNRJ 49318(5); *Imparfinis minutus*: MNRJ 14262(1); *Oligosarcus hepsetus*: MNRJ 25943(47); MNRJ 45851(1); *Parotocinclus bidentatus*: MNRJ 28225(1); MNRJ 28226(2); *Phalloceros harpagos*: MNRJ 41749(1); *Pimelodus maculatus*: MNRJ 14213(1); MNRJ 20738(4); MNRJ 46156(1); *Poecilia reticulata*: MNRJ 25949(38); MNRJ 41748(3); *Rhamdia quelen*: MNRJ 12392(1); MNRJ 25946(3); MNRJ 41744(1); *Rineloricaria nigricauda*: MNRJ 14037(2); MNRJ 26595(2); MNRJ 41747(21); *Synbranchus marmoratus*: MNRJ 25950(6); *Trichomycterus nigroauratus*: MNRJ 41745(2).

#### Bacia do Rio Paraíba do Sul

##### Município de Quatis

*Australoheros ipatinguensis*: MNRJ 25967(2); MNRJ 25986(54); *Callichthys callichthys*: MNRJ 25982(5); *Deuterodon giton*: MNRJ 19645(1); MNRJ 19660(6); MNRJ 25931(40); MNRJ 25969(25); *Deuterodon heterostomus*: MNRJ 25932(1); MNRJ 25988(1); MNRJ 25930(3); MNRJ 25955(2); *Geophagus brasiliensis*: MNRJ 25938(2); MNRJ 25968(6); MNRJ 25976(7); MNRJ 25987(1); *Gymnotus carapo*: MNRJ 25964(16); MNRJ 25985(10); *Harttia loricariformis*: MNRJ 25933(2); *Hoplias malabaricus*: MNRJ 25954(2); MNRJ 25977(4); *Hyphessobrycon bifasciatus*: MNRJ 25958(1); *Hyphessobrycon eques*: MNRJ 25959(15); *Hypomasticus mormyrops*: MNRJ 25929(7); MZUEL 14127(2); *Hypostomus vermicularis*: MNRJ 25934(1); MNRJ 25935(1); MNRJ 25972(2); MNRJ 25983(1); *Imparfinis minutus*: MNRJ 25971(33); MNRJ 25980(6); *Neoplecostomus microps*: MNRJ 25936(2); MNRJ 25973(3); *Oligosarcus hepsetus*: MNRJ 25957(4); MNRJ 25970(6); MNRJ 25979(13); *Pareiorhina rudolphi*: MZUSP 28447(1); *Phalloceros harpagos*: MNRJ 25965(3); MNRJ 25975(5); *Pimelodus maculatus*: MNRJ 25960(1); *Poecilia reticulata*: MNRJ 25966(29); *Psalidodon parahybae*: MNRJ 25956(5); MNRJ 25978(3); MNRJ 35844(5); *Rhamdia quelen*: MNRJ 25961(2); MNRJ 25981(2); *Rineloricaria nigricauda*: MNRJ 19685(5); MNRJ 25937(5); MNRJ 25962(2); MNRJ 25974(1); MNRJ 25984(4); *Synbranchus marmoratus*: MNRJ 25963(4).

#### Bacia do Rio Paraíba do Sul

##### Município de Resende

*Astyanax lacustris*: MNRJ 46012(14); *Australoheros ipatinguensis*: MNRJ 14946(6); MNRJ 19640(1); MNRJ 26216(1); MNRJ 26520(3); MNRJ 33071(1); MNRJ 41295(4); UFMT 2431(1); *Brycon opalinus*: MNRJ 11225(5); MNRJ 11229(1); MNRJ 11255(7); MNRJ 11256(2); MNRJ 11272(1); MNRJ 11273(1); *Callichthys callichthys*: MNRJ 43077(1); MZUSP 44509(1); MZUSP 114659(2); UFMT 2434(1); *Characidium lauroi*: DZSJRP 20361(1); DZSJRP 20365(1); DZSJRP 20369(3); MNRJ 11439(6); MNRJ 11440(1); MNRJ 11441(2); MNRJ 11536(1); MNRJ 11688(1); MNRJ 17443(1); MNRJ 19402(1); MNRJ 19410(2); MNRJ 19649(2); MNRJ 19651(4); MNRJ 26516(1); MNRJ 43067(14); MNRJ 48133(2); MZUSP 44515(2); MZUSP 114653(1); MZUSP 114663(1); *Cichla kelberi*: MNRJ 46808(16); MNRJ 46809(1); MNRJ 46810(1); *Crenicichla lacustris*: MCP 42472(1); MNRJ 14395(8); MNRJ 14398(1); MNRJ 15143(4); MNRJ 48685(1); *Cyphocharax gilbert*: MNRJ

41290(1); *Deuterodon giton*: MNRJ 11020(10); MNRJ 11021(2); MNRJ 11046(2); MNRJ 30985(23); *Deuterodon heterostomus*: MNRJ 17789(1); MNRJ 41308(1); *Deuterodon intermedius*: MNRJ 11029(4); MNRJ 11036(1); MNRJ 11037(2); MNRJ 11038(1); MNRJ 11042(6); MNRJ 11043(17); MNRJ 11044(4); MNRJ 11047(8); MNRJ 11048(6); MNRJ 11049(2); MNRJ 11052(2); MNRJ 11053(2); MNRJ 11054(24); MNRJ 11055(1); MNRJ 22160(22); MNRJ 43065(17); MNRJ 48134(12); MNRJ 48135(18); MZUSP 44503(3); MZUSP 44514(7); MZUSP 44516(1); MZUSP 114619(9); MZUSP 114620(1); MZUSP 114623(1); MZUSP 114661(4); *Geophagus brasiliensis*: MNRJ 14974(15); MNRJ 15167(4); MNRJ 19641(2); MNRJ 22161(5); MNRJ 26521(12); MNRJ 26527(2); MNRJ 43075(15); MZUSP 114650(2); MZUSP 114651(1); MZUSP 114658(3); MZUSP 114665(6); *Gymnotus carapo*: MNRJ 41307(1); MNRJ 43081(1); *Harttia carvalhoi*: MZUSP 44163(3); MZUSP 44505(6); MZUSP 44511(1); MZUSP 47568(1); *Harttia loricariformis*: DZSJRP 20358(3); MNRJ 19689(2); MNRJ 43078(1); *Hemipsilichthys papillatus*: MZUSP 57573(1); *Hisonotus notatus*: MZUSP 36182(2); *Hoplias malabaricus*: MCP 42471(1); MNRJ 41480(1); MNRJ 43068(1); *Hypomasticus mormyrops*: MCP 42469(1); MNRJ 17455(1); *Hypostomus auroguttatus*: MNRJ 43070(1); *Hypostomus vermicularis*: DZSJRP 20368(1); MCP 42397(3); MNRJ 14215(1); MNRJ 14260(3); MNRJ 17897(9); MNRJ 19671(1); MNRJ 25907(1); MNRJ 33511(1); MNRJ 49038(1); MNRJ 49039(1); MZUSP 44512(1); MZUSP 51623(1); MZUSP 114656(1); *Imparfinis minutus*: MNRJ 14258(3); MNRJ 14261(9); MNRJ 26524(5); *Metynnis lippincottianus*: MNRJ 49310(1); *Neoplecostomus microps*: DZSJRP 20362(11); DZSJRP 20367(10); MNRJ 13593(6); MNRJ 13681(10); MNRJ 13682(4); MNRJ 17471(3); MNRJ 20050(1); MNRJ 26519(5); MNRJ 26526(37); MNRJ 30988(1); MNRJ 41612(1); MNRJ 43071(8); MZUSP 44504(3); MZUSP 44507(7); MZUSP 114625(18); MZUSP 114628(1); MZUSP 114655(10); MZUSP 114666(8); UFMT 2433(5); *Oligosarcus hepsetus*: MNRJ 25906(1); MNRJ 43066(3); MZUSP 44517(2); MZUSP 114662(1); *Otothyris lophophanes*: MNRJ 13561(2); MNRJ 17416(1); MNRJ 43476(1); *Pachyurus adspersus*: MNRJ 41284(1); *Pareiorhina brachyrhyncha*: MNRJ 30990(1); MNRJ 43072(103); MNRJ 48139(6); *Pareiorhina rudolphi*: DZSJRP 20359(1); DZSJRP 20363(6); MCP 10681(2); MNRJ 13594(9); MNRJ 13675(2); MNRJ 14155(7); MNRJ 17438(25); MNRJ 17444(20); MNRJ 19328(20); MNRJ 26518(2); MNRJ 43079(1); MNRJ 48138(6); MZUSP 44506(22); MZUSP 44508(1); MZUSP 109964(4); MZUSP 114618(27); MZUSP 114624(25); MZUSP 114627(30); MZUSP 114654(1); *Parotocinclus bidentatus*: AMNH 236543(3); MCP 42430(2); MNRJ 14217(10); MNRJ 17467(1); MNRJ 27962(1); UFMT 2430(2); *Phalloceros harpagos*: DZSJRP 20366(23); MNRJ 19635(4); MNRJ 26522(11); MZUSP 44518(1); MZUSP 109962(2); MZUSP 114626(6); MZUSP 114652(12); MZUSP 114660(1); UFMT 2435(8); *Pimelodella lateristriga*: MNRJ 11274(1); *Pimelodus maculatus*: MNRJ 14214(1); MNRJ 14218(3); MNRJ 49027(1); MNRJ 49028(1); MNRJ 49029(1); MNRJ 49030(1); MNRJ 49319(17); *Pogonopoma parahybae*: MNRJ 14778(2); *Prochilodus lineatus*: MNRJ 11278(3); MNRJ 11279(1); *Psilododon parahybae*: DZSJRP 20364(11); DZSJRP 20370(25); MCP 8981(3); MCP 14564(3); MCP 42474(3); MNRJ 26517(4); MNRJ 26523(6); MNRJ 41286(1); UFMT 2432(17); *Rhamdia quelen*: MNRJ 12406(1); MNRJ 12407(1); MNRJ 14259(2); MNRJ 17899(2); MNRJ 17900(1); MNRJ 19687(3); MZUSP 44513(2); *Rineloricaria nigricauda*: MCP 42379(6); MNRJ 14030(8); MNRJ 14032(1); MNRJ 14033(9); MNRJ 14035(36); MNRJ 14038(2); MNRJ 14040(1); MNRJ 26525(2); MNRJ 26600(2); MNRJ 43073(17); MZUSP 44510(12); MZUSP 114648(10); MZUSP 114664(2); *Synbranchus marmoratus*: MNRJ 43074(1); *Taunayia bifasciata*: MNRJ 43080(1); *Trichomycterus albinotatus*: UFRJ 5628(3); UFRJ 9873(2); UFRJ 11666(15); *Trichomycterus auroguttatus*: MNRJ 14355(6); MNRJ 17422(2); MNRJ 17427(1); MNRJ 17430(3); MNRJ 17466(1); MNRJ 43076(3); MNRJ 49053(3); MNRJ 49054(1); MZUSP 109963(3); MZUSP 114621(1); MZUSP 114622(7); MZUSP 114629(1); MZUSP 114630(6); MZUSP 114649(1); UFRJ 611(4); *Trichomycterus itatiayae*: MNRJ 4345(2); MNRJ 14156(9); MNRJ 17437(13); MNRJ 17442(6); MNRJ 20049(1); MZUSP 44499(60); MZUSP 44501(17); MZUSP 44502(3); *Trichomycterus mariamole*: DZSJRP 20360(1); DZSJRP 20371(1); MCP 10683(1); MNRJ 14358(1); MNRJ 17417(1); MNRJ 28724(2); MNRJ 30986(5); MNRJ 30987(5); MNRJ 30989(1); MNRJ 30991(1); MNRJ 36868(1); MNRJ 48136(1); MNRJ 48137(2); MNRJ 49055(2); MZUSP 114657(21); UFRJ 5142(15); UFRJ 5400(3); UFRJ 5666(17); UFRJ 6026(1); *Trichomycterus mirissumba*: MNRJ 19631(2); MZUSP 43345(1); MZUSP 43346(3); MZUSP 44500(7); UFRJ 601(1); UFRJ 642(3); *Trichomycterus travassosi*: MNRJ 14356(1); MNRJ 14357(5); MNRJ 43069(79); MZUSP 44559(1).

#### **Bacia do Rio Paraíba do Sul**

Município de Rio das Flores

*Brycon opalinus*: MZUSP 83433(2); *Characidium lauroi*: MNRJ 15364(3); *Deuterodon intermedius*: MNRJ 15375(4); MNRJ 16706(2); MNRJ 16710(20); *Gymnotus carapo*: MNRJ 14674(1); *Imparfinis minutus*: MNRJ 15451(1); *Neoplecostomus microps*: MNRJ 16002(2); *Phalloceros harpagos*: MNRJ 16049(2); *Trichomycterus florensis*: MNRJ 14379(1).

#### **Bacia do Rio Paraíba do Sul**

Município de Três Rios



*Astyanax lacustris*: MNRJ 16647(1); *Australoheros ipatinguensis*: MNRJ 14350(1); MNRJ 45917(1); MNRJ 46487(2); *Characidium lauroi*: MNRJ 45942(1); *Cichla kelberi*: MNRJ 46483(1); *Corydoras nattereri*: MNRJ 16496(1); *Crenicichla lacustris*: MNRJ 45947(1); MNRJ 46482(1); MNRJ 46486(1); MZUSP 86078(1); *Deuterodon heterostomus*: MNRJ 15382(1); MNRJ 17543(1); *Deuterodon intermedius*: MNRJ 15290(46); MNRJ 15376(1); MNRJ 15389(1); MNRJ 16280(1); MNRJ 16289(1); MNRJ 16293(2); MNRJ 16299(4); MNRJ 16468(9); MNRJ 16485(2); MNRJ 17123(8); MNRJ 17542(9); MNRJ 21174(1); MNRJ 45916(1); MNRJ 45921(19); MNRJ 45931(1); *Deuterodon taeniatus*: MNRJ 15373(2); MNRJ 15407(1); *Eigenmannia virescens*: MNRJ 14668(2); MNRJ 45922(1); MNRJ 45932(1); *Geophagus brasiliensis*: MNRJ 15502(17); MNRJ 16750(1); MNRJ 17124(30); MNRJ 17541(4); *Glanidium melanopterum*: MNRJ 12359(1); MNRJ 45919(22); MNRJ 45923(1); MNRJ 45948(1); *Gymnotus carapo*: MNRJ 46478(1); *Harttia loricariformis*: MNRJ 13360(1); *Hoplosternum littorale*: MNRJ 12306(1); MNRJ 45941(7); MNRJ 46475(2); *Hypomasticus copelandii*: MNRJ 16753(1); *Hypomasticus mormyrops*: MNRJ 46519(1); *Hypostomus affinis*: MNRJ 17544(3); *Hypostomus auroguttatus*: MNRJ 46479(1); *Hypostomus luetkeni*: MNRJ 12421(1); MNRJ 16032(1); MNRJ 16266(2); MNRJ 17833(1); MNRJ 44172(1); MNRJ 44173(1); MNRJ 45943(2); MNRJ 46477(1); MNRJ 47670(1); MZUSP 45405(1); *Hypostomus vermicularis*: MNRJ 17136(1); MNRJ 45944(3); MNRJ 46484(1); *Oligosarcus hepsetus*: MNRJ 15387(1); *Otocinclus affinis*: MNRJ 16494(1); *Pimelodus maculatus*: MNRJ 46476(1); MNRJ 46481(2); MZUSP 85486(1); MZUSP 86077(8); *Plagioscion squamosissimus*: MNRJ 45933(2); MNRJ 45950(2); MNRJ 46480(2); *Poecilia vivipara*: MNRJ 17829(1); MNRJ 45924(2); *Psalidodon parahybae*: MNRJ 15386(1); MNRJ 15390(1); MNRJ 45918(2); MNRJ 45920(2); MNRJ 45930(5); MNRJ 45946(1); MNRJ 45951(1); *Rineloricaria nigricauda*: MNRJ 13953(1); MNRJ 13957(1); MNRJ 13958(2); MNRJ 13959(2); MNRJ 13961(36); MNRJ 45929(1); MNRJ 45945(5); MNRJ 46485(1); *Steindachneridion parahybae*: MNRJ 12235(1); MNRJ 12237(1); MNRJ 12238(1); MNRJ 12239(1); MNRJ 12240(1); MNRJ 12301(1); MNRJ 12302(2); MNRJ 12303(1); *Trachelyopterus striatulus*: MNRJ 15914(1).

#### **Bacia do Rio Paraíba do Sul**

Município de Valença

*Corydoras nattereri*: MNRJ 50149(3); *Loricariichthys castaneus*: MNRJ 14036(10); *Poecilia reticulata*: MCP 25563(11); *Trichomycterus florensis*: UFRJ 595(9); UFRJ 646(1); UFRJ 5463(1).

#### **Bacia do Rio Paraíba do Sul**

Município de Vassouras

*Astyanax lacustris*: MNRJ 17880(2); *Deuterodon giton*: MNRJ 20744(1); *Deuterodon intermedius*: MNRJ 17857(17); MNRJ 17879(2); MNRJ 17884(3); MNRJ 17885(2); MNRJ 17886(1); MNRJ 17887(1); MNRJ 18991(1); MNRJ 18992(1); MNRJ 18993(1); MNRJ 18994(1); MNRJ 18995(1); MNRJ 18996(1); MNRJ 18997(1); MNRJ 18998(1); MNRJ 18999(1); MNRJ 19000(1); MNRJ 19001(1); MNRJ 20743(1); *Geophagus brasiliensis*: MNRJ 15108(29); *Gymnotus carapo*: MNRJ 17819(1); *Hyphessobrycon bifasciatus*: MNRJ 17881(2); *Hyphessobrycon eques*: MNRJ 17882(1); MNRJ 17883(1); *Hypostomus vermicularis*: MNRJ 20904(1); *Rhamdia quelen*: MNRJ 17820(1); *Rineloricaria nigricauda*: MNRJ 15742(16); *Trichomycterus florensis*: MNRJ 4817(1).

#### **Bacia do Rio Paraíba do Sul**

Município de Volta Redonda

*Crenicichla lacustris*: MNRJ 29790(1); *Deuterodon intermedius*: MNRJ 20742(1); *Geophagus brasiliensis*: MNRJ 24087(5); MNRJ 24090(2); *Gymnotus carapo*: MNRJ 47124(1); *Hypostomus vermicularis*: MNRJ 49362(11); *Oreochromis niloticus*: MNRJ 24088(1); *Pimelodus maculatus*: MCP 8982(1); *Poecilia reticulata*: MNRJ 24086(2); MNRJ 24089(12); *Psalidodon parahybae*: MNRJ 24085(2); MNRJ 24091(2); *Rineloricaria nigricauda*: MZUSP 105197(5); MZUSP 105198(4).

### **RH-4 Região Hidrográfica Piabanha**

#### **Bacia do Rio Paraíba do Sul**

Município de Areal

Não identificada: MNRJ 15569(2).

#### **Bacia do Rio Paraíba do Sul**

Município de Carmo

*Astyanax lacustris*: MCP 12590(11); MNRJ 5943(1); MNRJ 5944(1); MNRJ 15278(1); MNRJ 15309(1); MNRJ 17456(17); MNRJ 22774(1); MNRJ 39837(6); MNRJ 39850(4); MNRJ 40271(4); MNRJ 47319(9); MNRJ 47327(1); *Australoheros ipatinguensis*: MCP 43130(1); MNRJ 6008(1); MNRJ 14683(1); MNRJ 14691(2); MNRJ 14703(7); MNRJ 14706(6); MNRJ

14707(2); MNRJ 14715(5); MNRJ 14756(5); MNRJ 16525(2); MNRJ 17117(1); MNRJ 17119(1); MNRJ 17132(6); MNRJ 32555(1); MNRJ 40278(1); MNRJ 44972(7); MNRJ 47316(3); MNRJ 47322(11); MNRJ 47329(2); *Awaous tajassica*: MNRJ 5975(1); MNRJ 6027(1); MNRJ 15316(1); *Brycon opalinus*: MNRJ 15291(1); MNRJ 21469(1); *Bryconamericus tenuis*: MNRJ 25810(1); MNRJ 39838(13); MNRJ 39840(2); MNRJ 39851(4); *Characidium alipioi*: MNRJ 5550(1); MNRJ 5551(1); MNRJ 5552(1); MNRJ 5553(1); MNRJ 5554(1); MNRJ 5555(1); MNRJ 15115(1); MNRJ 40274(1); *Coptodon rendalli*: MNRJ 14762(1); *Corydoras nattereri*: MNRJ 6020(1); MNRJ 14244(7); MNRJ 14245(2); MNRJ 47318(1); *Crenicichla lacustris*: MNRJ 15011(1); MNRJ 47323(1); *Cyphocharax gilbert*: MNRJ 12877(1); MNRJ 21495(1); MNRJ 25809(3); *Deuterodon giton*: MNRJ 10874(53); MNRJ 15279(2); MNRJ 15280(1); MNRJ 15282(72); MNRJ 15284(17); MNRJ 15292(22); MNRJ 15293(11); MNRJ 15307(2); MNRJ 15311(26); MNRJ 15313(7); MNRJ 15314(16); MNRJ 15366(10); MNRJ 22773(9); MNRJ 25807(39); MNRJ 25808(4); *Deuterodon intermedius*: MNRJ 6275(1); MNRJ 6276(1); MNRJ 6279(1); MNRJ 16520(1); *Deuterodon taeniatus*: MNRJ 15275(14); MNRJ 15277(1); MNRJ 22775(9); *Eigenmannia virescens*: MNRJ 6032(1); MNRJ 8979(3); MNRJ 14816(4); *Geophagus brasiliensis*: MCP 12588(27); MNRJ 14315(2); MNRJ 14318(3); MNRJ 14320(4); MNRJ 14321(3); MNRJ 14332(3); MNRJ 14608(15); MNRJ 14611(8); MNRJ 14625(2); MNRJ 14702(1); MNRJ 14704(5); MNRJ 14728(3); MNRJ 15289(2); MNRJ 17102(3); MNRJ 22769(1); MNRJ 25813(2); MNRJ 47324(8); MNRJ 47328(2); *Glanidium melanopterum*: MNRJ 6015(1); *Gymnotus carapo*: MNRJ 14667(2); MNRJ 14677(1); MNRJ 47317(2); MNRJ 47320(2); *Harttia loricariformis*: MNRJ 11782(1); MNRJ 13328(1); *Hisonotus notatus*: MNRJ 40276(2); *Hoplias malabaricus*: MNRJ 6025(1); MNRJ 14685(1); MNRJ 15321(1); MNRJ 15322(4); *Hoplosternum littorale*: MNRJ 47312(1); *Hyphessobrycon bifasciatus*: MNRJ 17116(5); MNRJ 17130(29); MNRJ 22772(1); *Hyphessobrycon eques*: MNRJ 47310(2); *Hyphessobrycon flammeus*: MNRJ 21501(1); *Hypomasticus copelandii*: MNRJ 10557(3); MNRJ 15283(1); MNRJ 15285(1); MNRJ 15294(1); MNRJ 15298(1); MNRJ 15299(1); MNRJ 15305(1); *Hypomasticus mormyrops*: MNRJ 21496(1); *Hypomasticus thayeri*: MNRJ 15323(1); *Hypostomus luetkeni*: MCP 12547(18); MNRJ 4275(1); MNRJ 14754(1); MNRJ 15286(2); MNRJ 15288(1); MNRJ 15303(6); MNRJ 15391(1); MNRJ 15548(1); MNRJ 15552(2); MNRJ 17873(1); MNRJ 21497(2); MNRJ 39854(1); MNRJ 40275(2); MNRJ 47313(2); MZUSP 45404(2); MZUSP 66213(1); *Hypostomus vermicularis*: MNRJ 17845(1); MNRJ 17892(3); *Imparfinis minutus*: MNRJ 15296(1); MNRJ 15310(2); *Knodus moenkhausii*: MNRJ 39839(32); MNRJ 40273(27); MNRJ 47311(5); MNRJ 47326(17); *Megaleporinus conirostris*: MNRJ 14747(2); MNRJ 15304(2); *Mimagoniates microlepis*: MNRJ 39853(1); Não identificada: MNRJ 39836(3); MNRJ 40270(5); *Neoplecostomus microps*: MNRJ 13556(15); *Oligosarcus hepsetus*: MNRJ 15276(1); MNRJ 15287(1); MNRJ 15295(14); MNRJ 15306(8); MNRJ 15308(14); MNRJ 15317(2); MNRJ 15324(6); MNRJ 22770(1); MNRJ 25805(1); *Oreochromis niloticus*: MNRJ 14769(2); MNRJ 47325(3); MNRJ 47333(12); *Otothyris lophophanes*: MNRJ 43167(1); MNRJ 43168(1); MNRJ 43169(1); *Phalloceros harpagos*: MNRJ 15312(7); MNRJ 16014(9); UNT 8962(1); *Pimelodella lateristriga*: MCP 12574(10); MNRJ 5977(1); MNRJ 14967(1); MNRJ 22768(1); *Pimelodus maculatus*: MNRJ 14770(1); *Poecilia reticulata*: MCP 12580(196); MNRJ 14750(54); MNRJ 15297(1); MNRJ 15541(3); MNRJ 15949(9); MNRJ 15975(84); MNRJ 15984(24); MNRJ 25812(50); MNRJ 40277(2); *Poecilia vivipara*: MNRJ 15944(2); MNRJ 15966(1); MNRJ 21498(1); MNRJ 47315(34); MNRJ 47321(11); *Pogonopoma parahybae*: MNRJ 4278(1); *Prochilodus vimboides*: MNRJ 12226(1); *Psalidodon parahybae*: MNRJ 15281(4); MNRJ 15320(8); MNRJ 15365(23); MNRJ 22771(1); MNRJ 25806(19); MNRJ 39852(14); MNRJ 40272(8); *Rhamdia quelen*: MCP 12558(3); MNRJ 6051(1); MNRJ 12376(1); MNRJ 12389(1); MNRJ 12402(1); *Rineloricaria nigricauda*: MNRJ 738(1); MNRJ 13540(5); MNRJ 13947(1); MNRJ 13949(1); MNRJ 13979(21); MNRJ 13980(27); MNRJ 13981(22); MNRJ 13982(2); MNRJ 13983(5); MNRJ 13984(6); MNRJ 13985(3); MNRJ 13986(73); MNRJ 13987(4); MNRJ 13988(2); MNRJ 14013(17); MNRJ 14053(1); MNRJ 22776(4); MNRJ 25811(2); MNRJ 26599(1); MNRJ 26601(19); MNRJ 26620(3); MNRJ 26624(1); MNRJ 27761(3); *Salminus brasiliensis*: MNRJ 46044(1); *Steindachneridion parahybae*: MNRJ 6378(1); *Synbranchus marmoratus*: MNRJ 47314(2); *Trachelyopterus striatulus*: MNRJ 6023(1); *Trichomycterus largoperculatus*: MNRJ 4185(5); MNRJ 15301(4); MNRJ 15523(23).

#### **Bacia do Rio Paraíba do Sul**

Município de Paraíba do Sul

*Australoheros ipatinguensis*: MNRJ 15534(1); *Corydoras nattereri*: MNRJ 14247(22); *Deuterodon intermedius*: MNRJ 16692(28); *Geophagus brasiliensis*: MNRJ 15385(9); *Harttia loricariformis*: MNRJ 12149(2); *Hyphessobrycon bifasciatus*: MNRJ 17146(8); *Hypostomus luetkeni*: MNRJ 15533(4); *Neoplecostomus microps*: MNRJ 15532(1); *Poecilia reticulata*: MNRJ 15985(38); *Rhamdia quelen*: MNRJ 12400(1); *Rineloricaria nigricauda*: MNRJ 13993(18); *Trichomycterus florensis*: MNRJ 14354(16).

#### **Bacia do Rio Paraíba do Sul**

Município de Petrópolis

*Australoheros ipatinguensis*: MCP 44194(2); MNRJ 28860(1); *Characidium alipioi*: MNRJ 13659(1); MNRJ 19189(1); MNRJ 20052(3); MNRJ 21161(1); MNRJ 28865(2); MNRJ 12843(13); MNRJ 19316(3); *Characidium vidali*: MNRJ 14402(1); MNRJ 15035(2); MNRJ 15036(2); MNRJ 15043(1); *Corydoras nattereri*: MNRJ 19591(20); MNRJ 28849(11); MNRJ 28867(6); MNRJ 38926(7); *Deuterodon intermedius*: MNRJ 4990(1); MNRJ 14432(7); MNRJ 14434(1); MNRJ 19587(1); *Deuterodon janeiroensis*: MNRJ 28862(7); *Geophagus brasiliensis*: MCP 44158(1); MNRJ 13658(2); MNRJ 19190(4); MNRJ 19558(9); MNRJ 19601(3); MNRJ 28861(3); *Gymnotus carapo*: MNRJ 13660(1); MNRJ 14406(2); MNRJ 28859(1); MNRJ 19559(1); MZUSP 24869(2); *Hemipsilichthys gobio*: MZUSP 26814(2); *Hyphessobrycon bifasciatus*: MNRJ 28839(3); MNRJ 28847(1); MNRJ 28863(10); *Hypostomus luetkeni*: MNRJ 19588(18); *Kronichthys heylandi*: MCP 44170(1); Não identificada: MNRJ 15427(2); *Neoplecostomus microps*: MCP 44156(2); MNRJ 12802(5); MNRJ 13661(1); MNRJ 13664(17); MNRJ 14429(1); MNRJ 15538(1); MNRJ 19186(5); MNRJ 19420(4); MNRJ 19597(1); MNRJ 19598(3); MNRJ 20881(3); MNRJ 21037(1); MNRJ 28841(1); MNRJ 28851(1); MNRJ 28855(1); MNRJ 44007(9); MNRJ 44010(3); MZUSP 24870(3); *Oligosarcus hepsetus*: UFRGS 18812(1); *Oncorhynchus mykiss*: MNRJ 20877(1); *Phalloceros harpagos*: DZSJRP 20372(23); MCP 44157(11); MNRJ 14419(8); MNRJ 19187(216); MNRJ 19192(95); MNRJ 19600(61); MNRJ 19604(125); MNRJ 21012(3); MNRJ 21124(252); MNRJ 28799(11); MNRJ 28808(4); MNRJ 28816(11); MNRJ 28822(6); MNRJ 28826(10); MNRJ 28834(8); MNRJ 28845(15); MNRJ 28858(8); MNRJ 28864(7); MNRJ 42206(14); MNRJ 44011(128); MNRJ 51787(37); MZUSP 35682(2); UFRGS 18813(2); *Phalloceros leptokeras*: MNRJ 14422(45); MNRJ 17148(25); *Poecilia reticulata*: MNRJ 21123(9); MNRJ 44012(3); *Poecilia vivipara*: MNRJ 28837(1); *Rhamdia quelen*: MNRJ 12396(1); MNRJ 14416(3); MNRJ 14436(1); *Rineloricaria nigricauda*: MNRJ 19560(31); MNRJ 26603(6); MNRJ 28830(1); MNRJ 28853(1); *Scleromystax barbatus*: MNRJ 38927(11); UFRGS 18814(2); UFRGS 18815(1); *Trichomycterus goeldii*: MNRJ 28857(2); *Trichomycterus paquequerense*: MCP 44150(1); MCP 44155(5); MCP 44162(1); MCP 44169(2); MNRJ 12842(3); MNRJ 13662(12); MNRJ 13663(2); MNRJ 14157(17); MNRJ 14158(4); MNRJ 14409(1); MNRJ 14415(10); MNRJ 17421(13); MNRJ 19188(70); MNRJ 19191(14); MNRJ 19582(6); MNRJ 19583(83); MNRJ 19584(19); MNRJ 19590(1); MNRJ 19594(2); MNRJ 19602(54); MNRJ 20878(40); MNRJ 20879(1); MNRJ 20880(29); MNRJ 21011(71); MNRJ 28782(11); MNRJ 28843(5); MNRJ 28854(4); MNRJ 28856(2); MNRJ 28866(3); MNRJ 44005(1); MNRJ 44006(69); MNRJ 44008(74); MNRJ 44009(3); MZUSP 26889(7); MZUSP 39935(3); UFRGS 18811(2).

#### **Bacia do Rio Paraíba do Sul**

Município de São José do Vale do Rio Preto

*Deuterodon taeniatus*: MNRJ 16530(6); *Harttia loricariformis*: MNRJ 13361(2); *Hypostomus luetkeni*: MNRJ 39063(4); *Oligosarcus hepsetus*: MNRJ 39065(4); MNRJ 39066(1); *Phalloceros leptokeras*: MNRJ 15525(2); *Rhamdia quelen*: MNRJ 39059(2); MNRJ 39062(2); *Rineloricaria nigricauda*: MNRJ 39061(10); MNRJ 39064(5); *Rineloricaria nudipectoris*: MNRJ 39060(12); *Trichomycterus goeldii*: MNRJ 14351(8);

#### **Bacia do Rio Paraíba do Sul**

Município de Sapucaia

*Astyanax lacustris*: MNRJ 16624(2); MNRJ 16634(1); MNRJ 43556(1); MNRJ 47370(1); *Australoheros ipatinguensis*: MCP 54086(7); MNRJ 16954(1); MNRJ 17133(1); MNRJ 47367(8); UFRJ 7795(5); UFRJ 7817(3); UFRJ 7856(3); *Brachyhypopomus janeiroensis*: MNRJ 46420(1); *Brycon opalinus*: MNRJ 2564(3); MNRJ 6302(1); MNRJ 6305(1); *Coptodon rendalli*: MNRJ 16256(1); MNRJ 1012(1); MNRJ 14234(8); *Crenicichla lacustris*: MNRJ 15092(1); MNRJ 46416(1); MNRJ 46419(1); *Cyphocharax gilbert*: MNRJ 12868(1); *Deuterodon taeniatus*: MNRJ 16276(1); MNRJ 16303(5); MNRJ 16655(1); MNRJ 38716(6); *Eigenmannia virescens*: MNRJ 1180(1); MNRJ 14664(2); MNRJ 19161(4); *Geophagus brasiliensis*: MCP 13971(3); MNRJ 14609(16); MNRJ 14621(2); MNRJ 14718(9); MNRJ 14832(16); MNRJ 14834(7); MNRJ 43554(13); MNRJ 47374(7); *Glanidium melanopterum*: MNRJ 16874(6); *Gymnotus carapo*: MNRJ 14658(5); MNRJ 14819(1); MNRJ 47366(7); MNRJ 47369(1); *Harttia loricariformis*: MNRJ 12150(1); *Hoplias malabaricus*: MNRJ 16952(2); MNRJ 47371(3); *Hypomasticus mormyrops*: MNRJ 13398(4); *Hypomasticus thayeri*: MNRJ 46417(2); MNRJ 15550(2); MNRJ 17843(1); MNRJ 41799(1); MNRJ 43552(10); MNRJ 45952(1); MNRJ 47372(2); *Knodus moenkhausii*: MNRJ 43551(186); Não identificada: MNRJ 3210(1); MNRJ 3333(1); MNRJ 3466(1); *Neoplecostomus microps*: MNRJ 15527(3); MNRJ 43557(2); *Oligosarcus hepsetus*: MNRJ 16953(7); MNRJ 16955(1); MNRJ 17134(6); MNRJ 17160(4); *Oreochromis niloticus*: MNRJ 46418(1); *Otocinclus affinis*: MNRJ 14805(3); *Pachyurus adspersus*: MNRJ 14767(1); *Phalloceros harpagos*: MCP 30508(10); MNRJ 14745(59); MNRJ 23610(1); MNRJ 43595(93); USNM 320322(10); *Phalloceros leptokeras*: MCP 13736(3); MCP 30512(6); MNRJ 22509(36); MNRJ 23606(1); MNRJ 43596(286); MNRJ 47373(3); *Pimelodella lateristriga*: MNRJ 14968(3); MNRJ 16875(6); *Pimelodus maculatus*: MNRJ 17135(5); MNRJ 17847(1); *Poecilia reticulata*: MNRJ 43555(287); USNM 320336(15); *Psalidodon parahybae*: MNRJ 16302(11); MNRJ 16621(9); MNRJ 46421(2); *Rhamdia quelen*: MNRJ 12399(1); MNRJ 47368(1); *Rineloricaria*

*nigricauda*: MNRJ 13975(4); MNRJ 13976(2); MNRJ 27764(1); MZUSP 105201(2); *Steindachneridion parahybae*: MNRJ 992(1); MNRJ 1115(1); *Trachelyopterus striatulus*: MNRJ 17159(2); MNRJ 26405(1); *Trichomycterus paquequerense*: MNRJ 14375(33); MNRJ 43553(60).

### **Bacia do Rio Paraíba do Sul**

Município de Sumidouro

*Callichthys callichthys*: UFRGS 18827(1); *Characidium alipioi*: MNRJ 15110(5); *Deuterodon intermedius*: MNRJ 20735(3); *Deuterodon taeniatus*: MNRJ 15318(9); *Geophagus brasiliensis*: MNRJ 15300(2); MNRJ 20733(19); *Gymnotus carapo*: MNRJ 20724(2); *Harttia loricariformis*: MNRJ 11777(2); *Hoplias malabaricus*: MNRJ 20725(2); *Hypostomus luetkeni*: MNRJ 15530(1); MNRJ 20734(7); *Neoplecostomus variipictus*: MNRJ 15319(2); **Phalloceros harpagos**: MNRJ 15539(7); MNRJ 20736(7); UFRGS 18826(2); UNT 8961(1); *Poecilia reticulata*: MNRJ 20737(1); *Rineloricaria nigricauda*: MNRJ 13951(3).

### **Bacia do Rio Paraíba do Sul**

Município de Teresópolis

*Astyanax lacustris*: MNRJ 13693(3); MNRJ 13725(1); MNRJ 14413(3); MNRJ 51647(1); MZUSP 53762(1); *Australoheros ipatinguensis*: MNRJ 46309(1); *Brycon opalinus*: MNRJ 11227(1); *Callichthys callichthys*: MNRJ 46307(1); MNRJ 51659(1); *Characidium lauroi*: MCP 19863(5); MCP 19864(38); MNRJ 13656(24); MNRJ 13701(191); MNRJ 14404(54); MNRJ 14408(4); MNRJ 36863(35); MNRJ 36864(31); MNRJ 51648(3); MZUSP 68800(10); *Characidium vidali*: MNRJ 6118(1); MNRJ 6119(1); MNRJ 6120(1); MNRJ 6121(1); MNRJ 6122(1); MNRJ 6123(1); MNRJ 6124(1); MNRJ 13655(18); MNRJ 13703(76); MNRJ 13728(2); MNRJ 14025(1); MNRJ 14041(7); MNRJ 17432(3); MNRJ 19418(3); MNRJ 21687(1); *Deuterodon giton*: MNRJ 19384(19); MNRJ 46306(1); *Deuterodon hastatus*: MZUSP 53760(30); MZUSP 53761(2); *Deuterodon intermedius*: MNRJ 13690(4); MNRJ 13705(1); MNRJ 14044(10); MNRJ 14048(1); MNRJ 14433(35); MNRJ 14435(5); MNRJ 15315(49); MNRJ 16684(9); UFRGS 18822(1); *Deuterodon taeniatus*: MNRJ 10993(5); MNRJ 11003(4); MNRJ 46286(9); *Geophagus brasiliensis*: MNRJ 3437(1); MNRJ 13688(2); MNRJ 13711(7); MNRJ 13727(1); MNRJ 14042(5); MNRJ 14427(1); MNRJ 14428(20); MNRJ 19382(39); MNRJ 46313(4); MNRJ 51657(2); UFRGS 18823(2); *Gymnotus carapo*: MNRJ 14043(5); MNRJ 14426(5); MNRJ 51658(1); MZUSP 53764(1); *Harttia carvalhoi*: MNRJ 1038(11); MNRJ 14417(1); MNRJ 51653(9); *Harttia loricariformis*: MNRJ 916(1); MNRJ 927(3); MNRJ 13687(3); MNRJ 13729(1); MNRJ 14029(6); MNRJ 14437(15); MNRJ 46292(9); UFRGS 18816(4); *Hemipsilichthys gobio*: MNRJ 639(1); MNRJ 646(1); MNRJ 13654(4); MNRJ 51654(2); *Hisonotus notatus*: MNRJ 15544(1); *Hoplias malabaricus*: MNRJ 1122(2); MNRJ 5059(1); *Hyphessobrycon bifasciatus*: MNRJ 51649(1); *Hypomasticus copelandii*: MNRJ 5088(1); *Hypomasticus mormyrops*: MNRJ 10929(2); *Hypostomus auroguttatus*: MNRJ 14255(1); *Hypostomus luetkeni*: MNRJ 936(10); MNRJ 13691(2); MNRJ 13717(3); MNRJ 14438(32); MNRJ 46312(5); MNRJ 51660(3); UFRGS 18825(3); *Mimagoniates microlepis*: MCP 23657(13); MNRJ 13704(297); MNRJ 13709(16); MNRJ 14022(2); MNRJ 14024(5); MNRJ 14026(1); MNRJ 14414(65); MNRJ 25737(2); MZUSP 53763(221); MZUSP 115095(6); UFRGS 18818(8); Não identificada: MNRJ 5060(10); MNRJ 15536(2); MNRJ 15571(2); MZUSP 64000(2); MZUSP 64009(24); MZUSP 64024(11); *Neoplecostomus microps*: MNRJ 12803(4); MNRJ 13683(32); MNRJ 13715(1); MNRJ 13721(4); MNRJ 14430(1); MNRJ 14431(7); MNRJ 51641(3); *Neoplecostomus variipictus*: MNRJ 13702(9); MNRJ 15524(10); MNRJ 15528(1); MNRJ 17433(4); MNRJ 51655(29); *Oligosarcus hepsetus*: MNRJ 5058(1); MNRJ 46308(4); UFRGS 18821(1); *Oncorhynchus mykiss*: MNRJ 14425(1); *Otocinclus affinis*: MZUSP 42134(6); *Phalloceros harpagos*: MNRJ 13724(5); UFRGS 18820(24); *Phalloceros leptokeras*: MCP 20569(165); MNRJ 13689(2); MNRJ 13699(272); MNRJ 13710(10); MNRJ 14027(4); MNRJ 14420(5); MNRJ 14421(314); MNRJ 14423(34); MNRJ 14424(29); MNRJ 14497(8); MNRJ 15931(62); MNRJ 19608(61); MNRJ 22510(5); MNRJ 51305(1); MNRJ 51356(25); MNRJ 51643(799); MNRJ 51785(7); UNT 8963(6); *Pimelodella lateristriga*: MNRJ 817(2); *Pimelodus maculatus*: MNRJ 6181(1); *Poecilia reticulata*: MNRJ 51644(128); *Rhamdia quelen*: MNRJ 13692(1); MNRJ 13714(1); MNRJ 13722(5); MNRJ 51661(2); *Rineloricaria nigricauda*: UFRGS 18819(2); *Rineloricaria nudipectoris*: MNRJ 13695(2); MNRJ 13696(1); MNRJ 13697(28); MNRJ 13698(3); MNRJ 13707(5); MNRJ 13712(22); MNRJ 13713(2); MNRJ 13718(7); MNRJ 13719(7); MNRJ 13720(3); MNRJ 14023(3); MNRJ 14418(41); MNRJ 14498(1); MNRJ 14499(5); MNRJ 14500(9); MNRJ 14501(16); MNRJ 46296(7); MNRJ 51642(9); MNRJ 51656(72); MZUSP 53757(1); MZUSP 53758(2); UFRGS 18824(5); *Schizolecis guentheri*: MNRJ 15090(20); *Scleromystax barbatus*: MNRJ 13686(14); MNRJ 13694(3); MNRJ 13708(3); MNRJ 13716(2); MNRJ 13723(20); MNRJ 14403(18); MNRJ 51639(17); MNRJ 51652(19); MZUSP 53759(10); UFRGS 18817(13); UFRGS 22058(1); *Trichomycterus goeldii*: MCP 20606(2); MNRJ 956(9); MNRJ 972(9); MNRJ 6182(3); MNRJ 9036(1); MNRJ 13684(12); MNRJ 14020(38); MNRJ 14352(22); MNRJ 14353(8); MNRJ 14359(1); MNRJ 14360(1); MNRJ 14383(1); MNRJ 14405(32); MNRJ 14407(1); MNRJ 14411(3); MNRJ 24982(1); MNRJ 51640(11); MNRJ 51651(7); MZUSP 35714(5); MZUSP 53756(1); USNM 300986(1);

*Trichomycterus paquequerense*: MCP 20623(2); MNRJ 1159(1); MNRJ 5871(3); MNRJ 12840(19); MNRJ 12841(4); MNRJ 13685(6); MNRJ 13700(118); MNRJ 13706(1); MNRJ 13726(15); MNRJ 14049(8); MNRJ 14349(1); MNRJ 14410(6); MNRJ 14412(25); MNRJ 15521(21); MNRJ 17431(2); MNRJ 51650(3); MZUSP 42136(11); MZUSP 53755(28).

## **Bacia do Rio Paraíba do Sul**

Município de Três Rios

*Astyanax lacustris*: MNRJ 45940(1); *Australoheros ipatinguensis*: MNRJ 15910(1); *Cichla kelberi*: MNRJ 17111(1); *Corydoras nattereri*: MNRJ 14235(6); MNRJ 14238(3); MNRJ 17548(2); *Crenicichla lacustris*: MNRJ 15095(1); MNRJ 45925(1); *Deuterodon giton*: MNRJ 19010(1); *Deuterodon intermedius*: MNRJ 15388(6); MNRJ 15420(5); MNRJ 16292(1); MNRJ 16715(1); MNRJ 17149(2); MNRJ 46343(2); MNRJ 46345(6); MNRJ 46346(4); *Eigenmannia virescens*: MNRJ 14676(1); MNRJ 45926(1); *Geophagus brasiliensis*: MNRJ 14330(19); MNRJ 14618(1); MNRJ 14619(3); MNRJ 14697(1); MNRJ 14724(3); MNRJ 14814(2); MNRJ 14818(3); MNRJ 15380(11); MNRJ 14773(1); MNRJ 45927(1); *Gymnotus carapo*: MNRJ 14675(13); *Harttia loricariformis*: MNRJ 46342(1); *Hoplias malabaricus*: MNRJ 16752(1); MNRJ 17166(1); MNRJ 46341(1); *Hoplosternum littorale*: MNRJ 45928(1); MNRJ 45939(6); *Hypomasticus copelandii*: MNRJ 17553(2); MNRJ 46337(1); *Hypostomus auroguttatus*: MNRJ 46340(1); *Hypostomus luetkeni*: MNRJ 14204(1); MNRJ 17840(1); *Imparfinis minutus*: MNRJ 15381(1); *Loricariichthys castaneus*: MNRJ 17551(1); *Oligosarcus hepsetus*: MNRJ 15378(1); MNRJ 17550(1); *Otocinclus affinis*: MNRJ 15529(1); MNRJ 17552(4); *Parotocinclus bidentatus*: MNRJ 16011(1); *Phalloceros harpagos*: MNRJ 15994(2); *Pimelodella lateristriga*: MNRJ 17147(1); *Pimelodus maculatus*: MNRJ 17145(3); *Poecilia reticulata*: MNRJ 15940(132); MNRJ 15981(1); *Poecilia vivipara*: MNRJ 15977(8); *Psalidodon parahybae*: MNRJ 18179(4); MNRJ 46339(2); *Rhamdia quelen*: MNRJ 12388(1); *Rineloricaria nigricauda*: MNRJ 13952(1); MNRJ 13954(13); MNRJ 13956(3); MNRJ 13960(2); MNRJ 13962(11); MNRJ 13963(1); MNRJ 13966(13); MNRJ 13991(6); MNRJ 15384(2); MNRJ 26616(3); MNRJ 26621(6); MNRJ 46338(5); MNRJ 46344(5); *Steindachneridion parahybae*: MNRJ 12236(1); *Trichomycterus largoperculatus*: MNRJ 17418(1).

## **RH-5 Região Hidrográfica Baía de Guanabara**

### **Microbacias do Rio de Janeiro**

Município do Rio de Janeiro:

*Atherinella brasiliensis*: MNRJ 10786(3); MNRJ 49527(5); MZUSP 116181(35); ZUEC 10314(10); *Atlantirivulus guanabarensis*: MNRJ 24775(11); MNRJ 24777(19); MNRJ 25023(7); MNRJ 25304(4); MNRJ 25371(13); MNRJ 25421(2); MNRJ 25429(5); MNRJ 25436(4); MNRJ 25514(7); *Awaous tajassica*: MNRJ 4538(1); MNRJ 9662(2); MNRJ 24118(3); MNRJ 24181(3); MNRJ 25398(1); MNRJ 25866(3); MNRJ 31059(19); MNRJ 32360(1); MNRJ 49766(12); *Bathygobius soporator*: MNRJ 10794(37); MNRJ 25878(1); *Brevoortia pectinata*: MCP 8297(1); MCP 8298(1); MCP 8299(1); MNRJ 10782(5); MNRJ 12101(1); MNRJ 12102(1); MNRJ 12103(1); MNRJ 12104(1); MNRJ 12105(1); MNRJ 12106(1); MNRJ 12107(1); MNRJ 12108(1); MNRJ 12109(1); MNRJ 12110(1); MNRJ 12111(1); MNRJ 12112(1); MNRJ 12113(1); MNRJ 12114(1); MNRJ 12115(1); MNRJ 12116(1); MNRJ 12117(1); MNRJ 12118(1); MNRJ 12119(1); MNRJ 12120(1); MNRJ 12121(1); MNRJ 12122(1); MNRJ 12123(1); MNRJ 12124(1); MNRJ 12125(1); MNRJ 12126(1); MNRJ 25502(7); MNRJ 49654(5); *Callichthys callichthys*: MNRJ 949(14); MNRJ 3798(5); MNRJ 8571(1); MNRJ 24771(3); MNRJ 24776(3); MNRJ 24983(1); MNRJ 24984(1); MNRJ 25028(12); MNRJ 25370(2); MNRJ 25412(2); MNRJ 25418(1); MNRJ 25430(2); MNRJ 25849(1); MNRJ 25901(1); *Caranx crysos*: MNRJ 10788(1); *Centropomus parallelus*: MNRJ 10787(4); MNRJ 26451(3); *Centropomus undecimalis*: MNRJ 3652(15); MNRJ 49480(2); *Characidium interruptum*: MNRJ 5427(1); MNRJ 5428(1); MNRJ 5429(1); MNRJ 5430(1); MNRJ 5431(1); MNRJ 5432(1); MNRJ 5545(1); MNRJ 11687(1); MNRJ 25289(3); MNRJ 25295(7); MNRJ 26479(3); MNRJ 26484(3); MNRJ 28984(3); MNRJ 10798(3); *Coptodon rendalli*: MNRJ 24172(14); MNRJ 25031(6); MNRJ 28710(1); *Ctenogobius boleosoma*: MNRJ 9665(92); MNRJ 9675(13); MNRJ 26453(3); MNRJ 49770(14); *Ctenogobius smaragdus*: MNRJ 9663(5); MNRJ 9674(1); MNRJ 9676(1); *Deuterodon hastatus*: MNRJ 5985(1); MNRJ 25873(12); *Deuterodon janeiroensis*: MNRJ 8593(80); MNRJ 8594(1); MNRJ 8595(15); MNRJ 8596(1); MNRJ 8620(1); MNRJ 8621(1); MNRJ 8622(1); MNRJ 8623(1); MNRJ 8624(1); MNRJ 8625(1); MNRJ 8626(1); MNRJ 8627(1); MNRJ 8628(1); MNRJ 8630(2); MNRJ 8844(14); MNRJ 8927(23); MNRJ 9661(1); MNRJ 9668(32); MNRJ 15414(3); MNRJ 23116(1); MNRJ 24115(114); MNRJ 24116(283); MNRJ 24124(18); MNRJ 24179(10); MNRJ 25288(14); MNRJ 25293(9); MNRJ 25298(2); MNRJ 25334(27); MNRJ 25389(6); MNRJ 25400(2); MNRJ 25519(5); MNRJ 25617(7); MNRJ 25624(4); MNRJ 25821(21); MNRJ 25857(5); MNRJ 25865(15); MNRJ 25883(3); MNRJ 25884(1); MNRJ 25885(7); MNRJ 25897(15); MNRJ 25898(16); MNRJ 26156(5); MNRJ 26408(17); MNRJ 26413(3); MNRJ 26414(1); MNRJ 26471(1); MNRJ 26478(11); MNRJ 26482(11); MNRJ 26483(2); MNRJ 27717(3); MNRJ 28943(2); MNRJ 28947(25);

MNRJ 28950(2); MNRJ 28952(11); MNRJ 28955(9); MNRJ 28958(5); MNRJ 28961(3); MNRJ 28963(32); MNRJ 28966(21); MNRJ 28969(5); MNRJ 28985(1); MNRJ 28990(20); MNRJ 28992(1); MNRJ 32355(1); MNRJ 32359(3); MNRJ 32361(1); MNRJ 42506(1); USNM 100814(2); *Deuterodon luetkenii*: MNRJ 41430(7); *Diapterus auratus*: MNRJ 11314(4); *Diapterus rhombeus*: MNRJ 10792(5); *Dormitator maculatus*: MNRJ 25437(5); MNRJ 25820(1); MNRJ 26476(2); *Eleotris pisonis*: MNRJ 8700(1); MNRJ 9670(11); MNRJ 24173(1); MNRJ 25879(2); MNRJ 26452(9); MNRJ 26475(3); MNRJ 28949(1); *Elops saurus*: MNRJ 10780(1); MNRJ 10781(2); MNRJ 25375(1); MNRJ 49011(1); *Eucinostomus argenteus*: MNRJ 49477(3); MNRJ 49526(2); *Eucinostomus melanopterus*: MNRJ 25876(2); MNRJ 49478(1); *Eugerres brasiliensis*: MNRJ 10791(2); MZUSP 122883(21); *Evorthodus lyricus*: MNRJ 9666(1); *Genidens barbatus*: NPM 10841(2); *Genidens genidens*: MCP 8300(1); MCP 8301(1); MNRJ 10783(3); MNRJ 31316(2); *Geophagus brasiliensis*: MCP 8549(1); MCP 9072(1); MNRJ 1292(5); MNRJ 6037(1); MNRJ 8816(1); MNRJ 8817(1); MNRJ 8819(1); MNRJ 8820(1); MNRJ 8821(1); MNRJ 8822(1); MNRJ 8823(1); MNRJ 8824(1); MNRJ 8825(1); MNRJ 8842(303); MNRJ 9002(5); MNRJ 9386(1); MNRJ 9387(1); MNRJ 9388(1); MNRJ 9537(4); MNRJ 9667(1); MNRJ 10796(2); MNRJ 14973(1); MNRJ 16398(1); MNRJ 16399(2); MNRJ 16400(5); MNRJ 21179(1); MNRJ 24119(2); MNRJ 24128(1); MNRJ 24171(18); MNRJ 24178(3); MNRJ 24696(4); MNRJ 25030(18); MNRJ 25292(4); MNRJ 25297(3); MNRJ 25340(1); MNRJ 25382(5); MNRJ 25399(1); MNRJ 25406(17); MNRJ 25511(4); MNRJ 25518(2); MNRJ 25524(4); MNRJ 25622(3); MNRJ 25819(2); MNRJ 25825(17); MNRJ 25852(4); MNRJ 25856(25); MNRJ 25864(2); MNRJ 26412(2); MNRJ 26445(1); MNRJ 26474(9); MNRJ 26481(1); MNRJ 26488(1); MNRJ 31060(11); MNRJ 32350(1); MNRJ 32357(1); MNRJ 32362(1); MNRJ 35329(1); MNRJ 50111(1); *Gobionellus oceanicus*: MNRJ 10795(2); *Gymnotus carapo*: MNRJ 6352(1); MNRJ 9188(3); *Gymnotus pantherinus*: MNRJ 13673(3); MNRJ 25847(1); *Hoplerethrinus unitaeniatus*: MNRJ 24773(1); *Hoplias malabaricus*: MNRJ 8841(1); MNRJ 8843(6); MNRJ 9511(1); MNRJ 9741(4); MNRJ 15486(1); MNRJ 24166(5); MNRJ 24174(2); MNRJ 24182(3); MNRJ 25027(1); MNRJ 25290(1); MNRJ 25294(1); MNRJ 25300(1); MNRJ 25369(2); MNRJ 25402(11); MNRJ 25516(2); MNRJ 25520(1); MNRJ 25815(7); MNRJ 26485(1); *Hyphessobrycon bifasciatus*: MNRJ 10637(7); MNRJ 10899(1); MNRJ 24168(17); MNRJ 24176(284); MNRJ 24183(78); MNRJ 24695(15); MNRJ 25025(70); MNRJ 25299(2); MNRJ 25379(1); MNRJ 25401(12); MNRJ 25515(2); MNRJ 25738(2); *Hyphessobrycon boulengeri*: MNRJ 5863(1); MNRJ 24167(1); MNRJ 24175(11); MNRJ 24184(9); MNRJ 24772(24); MNRJ 25026(3); MNRJ 25368(25); MNRJ 25424(2); MNRJ 25425(10); MNRJ 25525(10); MNRJ 25814(7); MNRJ 26409(1); MNRJ 26472(1); MZUSP 19155(2); *Hypleurochilus fissicornis*: MNRJ 25877(2); *Hypostomus punctatus*: MNRJ 25392(7); MNRJ 25403(2); MNRJ 25521(7); MNRJ 25822(4); MNRJ 25850(7); *Jenynsia lineata*: MCP 8492(6); MNRJ 25365(2); MNRJ 25374(5); MNRJ 25376(1); MNRJ 25503(11); MNRJ 26441(4); MNRJ 26447(1); MNRJ 49541(1); MZUSP 86826(35); MZUSP 86829(40); MZUSP 86833(158); ZUEC 10311(18); *Kryptolebias brasiliensis*: MNRJ 6017(1); MNRJ 25333(9); MNRJ 25348(8); MNRJ 25411(25); *Kryptolebias caudomarginatus*: MCP 9551(4); MNRJ 19445(30); MNRJ 25363(9); MNRJ 25504(5); MNRJ 26444(2); MZUSP 38474(1); MZUSP 86827(1); ZUEC 4229(2); ZUEC 4880(2); *Microgobius meeki*: MNRJ 49595(4); *Micropogonias furnieri*: MNRJ 49653(4); *Mimagoniates microlepis*: MNRJ 24117(4); MNRJ 25335(47); MNRJ 25390(7); MNRJ 25858(19); MNRJ 25899(1); *Mugil curema*: MNRJ 10785(5); MNRJ 49643(1); *Mugil liza*: MNRJ 10784(3); MNRJ 26450(15); MZUSP 116320(26); ZUEC 10315(2); Não identificada: MNRJ 2130(1); MNRJ 2233(3); MNRJ 8818(1); MNRJ 9541(1); MNRJ 9664(1); MNRJ 15438(16); MNRJ 15439(2); MZUSP 64016(1); MZUSP 64021(10); NPM 9671(2); *Neoplecostomus microps*: MNRJ 640(1); *Notholebias minimus*: MNRJ 25303(6); MNRJ 25422(2); *Oligoplites saurus*: MNRJ 10789(1); *Oligosarcus hepsetus*: USNM 100815(1); *Oreochromis niloticus*: MNRJ 25032(1); MNRJ 25383(2); MNRJ 25407(1); MNRJ 25508(4); MNRJ 25526(4); MNRJ 25818(16); MNRJ 26446(7); MNRJ 28288(3); MNRJ 45881(1); MNRJ 8570(6); *Phalloceros anisophallos*: MNRJ 19497(43); MNRJ 25291(9); MNRJ 25296(6); MNRJ 25337(1); MNRJ 25366(4); MNRJ 25372(9); MNRJ 25413(7); MNRJ 25426(8); MNRJ 25522(3); MNRJ 25625(4); MNRJ 25854(1); MNRJ 25871(6); *Phalloceros harpagos*: MNRJ 6034(44); MNRJ 24126(115); MNRJ 24180(123); MNRJ 25346(21); MNRJ 25848(20); MNRJ 26480(3); MNRJ 26487(1); MNRJ 28946(5); MNRJ 28986(2); MNRJ 28987(7); MNRJ 35330(5); MZUSP 43471(32); *Phalloptychus januarius*: MCP 8493(65); MCP 9104(5); MCP 9544(10); MNRJ 3642(1); MNRJ 3643(1); MNRJ 24169(334); MNRJ 25301(5); MNRJ 25377(2); MNRJ 25505(19); MNRJ 25816(33); MNRJ 25875(1); MNRJ 26442(6); MNRJ 26449(1); MZUSP 86830(18); MZUSP 86831(148); MZUSP 92459(3); USNM 100914(1); *Pimelodella lateristriga*: MNRJ 815(1); MNRJ 25859(1); *Poecilia reticulata*: MNRJ 24120(57); MNRJ 24127(28); MNRJ 25332(7); MNRJ 25338(72); MNRJ 25367(8); MNRJ 25380(8); MNRJ 25395(28); MNRJ 25404(38); MNRJ 25419(3); MNRJ 25427(7); MNRJ 25434(2); MNRJ 25506(1); MNRJ 25509(4); MNRJ 25523(11); MNRJ 25618(22); MNRJ 25626(5); MNRJ 25823(11); MNRJ 25851(24); MNRJ 25855(66); MNRJ 25862(8); MNRJ 25874(5); MNRJ 25903(9); MNRJ 25904(1); MNRJ 26407(5); MNRJ 26411(2); MNRJ 28940(47); MNRJ 28941(12); MNRJ 28942(48); MNRJ 28945(54); MNRJ 28948(42); MNRJ 28951(1); MNRJ 28953(65); MNRJ 28959(4); MNRJ 28962(2); MNRJ 28964(14); MNRJ 28967(8); MNRJ 28970(5); MNRJ 28971(3); MNRJ 28972(8); MNRJ 28973(211); MNRJ 28974(53); MNRJ 28978(33); MNRJ

28979(13); MNRJ 28981(90); MNRJ 28982(134); MNRJ 28983(114); MNRJ 28988(28); MNRJ 28989(6); MNRJ 28991(1); MNRJ 28993(1); MNRJ 28994(23); MNRJ 28995(38); MNRJ 29001(33); MNRJ 29002(89); MNRJ 29003(2); MNRJ 31061(63); MNRJ 32351(1); MNRJ 32352(1); MNRJ 32356(1); *Poecilia vivipara*: MCP 8419(6); MCP 9105(15); MNRJ 5080(1); MNRJ 6036(18); MNRJ 8845(157); MNRJ 9660(7); MNRJ 9669(2); MNRJ 19484(2); MNRJ 24121(14); MNRJ 24170(247); MNRJ 24177(60); MNRJ 24185(147); MNRJ 24697(62); MNRJ 24774(11); MNRJ 24778(1); MNRJ 25024(1); MNRJ 25029(23); MNRJ 25302(4); MNRJ 25305(2); MNRJ 25347(28); MNRJ 25364(3); MNRJ 25373(8); MNRJ 25378(13); MNRJ 25381(2); MNRJ 25396(1); MNRJ 25420(4); MNRJ 25423(1); MNRJ 25428(3); MNRJ 25432(20); MNRJ 25435(1); MNRJ 25507(25); MNRJ 25510(8); MNRJ 25517(1); MNRJ 25751(18); MNRJ 25817(46); MNRJ 25824(8); MNRJ 26410(1); MNRJ 26443(3); MNRJ 26448(2); MNRJ 26473(1); MNRJ 28965(2); MNRJ 28968(3); MNRJ 32358(1); MZUSP 86825(146); MZUSP 86828(47); MZUSP 86832(100); USNM 100935(1); ZUEC 10313(22); *Rhamdia quelen*: MNRJ 6052(1); MNRJ 24125(1); MNRJ 25394(3); MNRJ 25620(2); MNRJ 25827(1); MNRJ 25853(3); MNRJ 25867(1); MNRJ 26486(5); **Schizolecis guentheri**: MNRJ 1028(12); MNRJ 9927(1); MNRJ 9928(1); MNRJ 9929(1); MNRJ 9930(1); MNRJ 9931(1); MNRJ 9932(1); MNRJ 9933(1); MNRJ 9934(1); MNRJ 9935(1); MNRJ 9936(1); MNRJ 9937(1); MNRJ 10006(3); MNRJ 24123(49); MNRJ 25393(12); MNRJ 25623(16); MNRJ 25861(8); MNRJ 25900(13); MNRJ 28944(5); MNRJ 28956(1); MNRJ 32354(1); *Scleromystax barbatus*: MNRJ 25336(22); MNRJ 25391(2); MNRJ 25621(6); MNRJ 25860(14); MNRJ 25902(1); MNRJ 28957(3); MNRJ 32353(1); *Spintherobolus broccae*: MNRJ 6267(3); *Symphurus jenynsi*: MNRJ 10800(2); *Synbranchus marmoratus*: MNRJ 6355(2); MNRJ 9580(1); MNRJ 9742(1); MNRJ 24495(1); MNRJ 24701(2); MNRJ 25433(1); MNRJ 46148(1); *Syngnathus folletti*: NPM 50164(10); *Trichomycterus giganteus*: MNRJ 19585(17); MNRJ 26406(4); MNRJ 26433(8); MNRJ 28975(4); MNRJ 28976(6); MNRJ 28977(1); MNRJ 28980(1); *Trichomycterus jacupiranga*: MNRJ 3931(19); MNRJ 26477(9); MNRJ 38409(8); MNRJ 40965(4); MNRJ 48890(2); *Trichomycterus nigricans*: MNRJ 6210(2); MNRJ 8810(28); MNRJ 8920(1); MNRJ 9377(8); MNRJ 15411(11); MNRJ 17428(32); MZUSP 67913(7); *Trinectes paulistanus*: MNRJ 9672(11); MNRJ 49638(1); *Ulaema lefroyi*: ZUEC 10312(2); *Xiphophorus helleri*: MNRJ 24122(3); MNRJ 25339(2); MNRJ 25397(4); MNRJ 25405(1); MNRJ 25619(4); MNRJ 25863(5); MNRJ 25905(2); MNRJ 28954(1).

#### **Microbacias da Baía de Guanabara**

Município do Cachoeiras de Macacu:

*Acentronichthys leptos*: MCP 26130(12); MCP 28562(13); MNRJ 13760(5); MNRJ 15062(4); MNRJ 22131(1); MNRJ 26643(2); MNRJ 27729(3); MNRJ 27768(1); MNRJ 27774(2); MNRJ 27787(1); MNRJ 27974(1); MNRJ 37048(1); MNRJ 37092(6); MNRJ 38214(1); MNRJ 38225(2); MNRJ 38248(1); MNRJ 43526(2); MNRJ 43697(1); MNRJ 48174(1); MNRJ 48634(1); MNRJ 51281(1); MZUSP 93855(11); MZUSP 93859(1); *Ancistrus multispinis*: MCP 20155(34); MCP 26143(2); MNRJ 11579(1); MNRJ 13743(36); MNRJ 14954(12); MNRJ 15060(2); MNRJ 26646(1); MNRJ 27792(1); MNRJ 27824(2); MNRJ 37050(24); MNRJ 37065(2); MNRJ 37084(5); MNRJ 37098(1); MNRJ 38216(6); MNRJ 38234(1); MNRJ 43530(8); MNRJ 47194(19); MNRJ 48183(2); MNRJ 48604(1); MNRJ 48633(1); MNRJ 51201(1); MNRJ 51243(2); MNRJ 51261(19); MNRJ 51274(15); MNRJ 51798(2); MZUSP 26841(8); MZUSP 93919(4); MZUSP 121362(5); UFRGS 18830(4); *Apistogramma cacatuoides*: MNRJ 37073(1); MNRJ 51216(2); *Astyanax keronolepis*: MNRJ 15050(3); MNRJ 26656(3); MNRJ 51270(1); UFRGS 10257(64); UFRGS 10259(52); *Astyanax lacustris*: MNRJ 47189(6); MNRJ 47232(3); MNRJ 48187(3); MNRJ 48611(6); MNRJ 52317(2); *Atlantirivulus guanabarensis*: MNRJ 27987(1); *Australoheros oblongus*: MCP 26135(5); MCP 54079(2); MNRJ 14878(7); MNRJ 14964(4); MNRJ 27742(4); MNRJ 27806(1); MNRJ 27984(4); MNRJ 37045(1); MNRJ 47247(2); MNRJ 48186(1); MNRJ 48622(2); MNRJ 51237(1); MZUSP 26844(1); UFRJ 5315(8); UFRJ 5344(8); UFRJ 7244(3); UFRJ 7254(1); *Awaous tajasica*: MNRJ 47250(1); MNRJ 48181(2); MNRJ 48548(1); MNRJ 48623(11); MNRJ 51219(3); MNRJ 51235(1); MZUSP 26842(7); *Bryconamericus ornaticeps*: MCP 20495(1); MCP 26129(10); MCP 35108(1); MNRJ 10636(35); MNRJ 12310(1); MNRJ 12313(19); MNRJ 13646(6); MNRJ 19619(12); MNRJ 19969(1); MNRJ 19993(63); MNRJ 20394(2); MNRJ 20395(5); MNRJ 22129(5); MNRJ 26667(13); MNRJ 27734(14); MNRJ 27800(1); MNRJ 27812(5); MNRJ 37058(11); MNRJ 38242(18); MNRJ 43524(38); MNRJ 47191(52); MNRJ 47235(11); MNRJ 48171(10); MNRJ 48542(9); MNRJ 48598(34); MNRJ 48615(7); MNRJ 50648(1); MNRJ 51226(51); MNRJ 51239(37); MNRJ 51257(55); MNRJ 51795(6); MNRJ 52323(1); MZUSP 26843(18); MZUSP 93982(1); MZUSP 121257(98); MZUSP 121366(1); UFRGS 10433(2); UFRGS 18828(21); UFRGS 18834(337); UFRGS 18843(5); *Callichthys callichthys*: MNRJ 37042(8); MNRJ 51804(1); *Characidium grajahuense*: MNRJ 11436(17); MNRJ 13754(3); MNRJ 13755(10); MNRJ 13756(13); MNRJ 13757(6); MNRJ 14950(22); MNRJ 14995(1); *Characidium interruptum*: MNRJ 11432(25); MNRJ 13762(1); MNRJ 19406(5); MNRJ 26670(5); MNRJ 37091(1); MNRJ 51259(2); MNRJ 51810(6); MZUSP 49157(4); USNM 290011(7); *Characidium vidali*: MCP 19865(6); MCP 26136(9); MNRJ 19388(5); MNRJ 19607(5); MNRJ 19616(19); MNRJ 20602(2); MNRJ 20603(5); MNRJ 21003(6); MNRJ 22123(3); MNRJ 24217(1); MNRJ 26645(4); MNRJ



26669(10); MNRJ 27727(17); MNRJ 27739(2); MNRJ 27741(10); MNRJ 27769(1); MNRJ 27772(4); MNRJ 27773(4); MNRJ 27786(8); MNRJ 27790(8); MNRJ 27794(3); MNRJ 27828(1); MNRJ 37046(10); MNRJ 37083(8); MNRJ 37090(15); MNRJ 38213(68); MNRJ 38222(18); MNRJ 38228(16); MNRJ 38241(13); MNRJ 39160(20); MNRJ 41266(4); MNRJ 43521(17); MNRJ 46630(3); MNRJ 47188(7); MNRJ 48172(4); MNRJ 48592(40); MNRJ 48630(35); MNRJ 50646(1); MNRJ 51194(23); MNRJ 51199(40); MNRJ 51241(3); MNRJ 51260(12); MNRJ 51273(42); MNRJ 51370(5); MNRJ 51797(6); MZUSP 93892(1); MZUSP 121262(4); MZUSP 121363(6); UFRGS 18829(9); *Corydoras nattereri*: MCP 20658(33); MNRJ 14960(18); MNRJ 19390(7); MNRJ 27743(2); MNRJ 27979(2); MNRJ 37043(10); MNRJ 37063(1); MNRJ 37096(1); MNRJ 43528(12); MNRJ 46843(8); MNRJ 47237(42); MNRJ 52320(2); MZUSP 26846(15); MZUSP 26847(14); UFRGS 18844(2); USNM 257423(9); *Crenicichla lepidota*: MNRJ 19995(1); MNRJ 22126(4); MNRJ 27807(1); MNRJ 27817(1); MNRJ 27821(2); MNRJ 38239(1); MNRJ 38256(2); MNRJ 47202(9); MNRJ 47248(3); MNRJ 48179(7); MNRJ 48546(1); MNRJ 48607(1); MNRJ 48620(2); MNRJ 51218(7); MNRJ 51233(8); MNRJ 51254(2); *Cyphocharax gilbert*: MNRJ 11212(5); MZUSP 26861(1); *Deuterodon hastatus*: MCP 26138(2); MCP 43285(24); MNRJ 11040(7); MNRJ 11041(38); MNRJ 13733(2); MNRJ 13758(35); MNRJ 15052(20); MNRJ 15053(3); MNRJ 15054(7); MNRJ 19389(10); MNRJ 19392(6); MNRJ 22130(2); MNRJ 26671(6); MNRJ 27746(69); MNRJ 27748(2); MNRJ 27783(1); MNRJ 27813(2); MNRJ 37039(3); MNRJ 37055(21); MNRJ 37056(1); MNRJ 37057(5); MNRJ 37082(1); MNRJ 37088(1); MNRJ 38229(1); MNRJ 38243(1); MNRJ 38244(13); MNRJ 46837(239); MNRJ 47190(1); MNRJ 47233(38); MNRJ 47234(2); MNRJ 48170(4); MNRJ 48324(69); MNRJ 48541(8); MNRJ 48597(10); MNRJ 48612(23); MNRJ 48629(1); MNRJ 50647(5); MNRJ 51205(30); MNRJ 51224(3); MNRJ 51225(1); MNRJ 51238(1); MNRJ 51794(21); MNRJ 52318(118); MZUSP 121265(10); UFRGS 10258(10); UFRGS 10272(6); *Deuterodon janae*: MNRJ 22117(1); MNRJ 26652(5); MNRJ 26654(8); MNRJ 27747(1); MNRJ 27782(1); MNRJ 27784(1); MNRJ 27797(14); MNRJ 27814(3); MNRJ 27819(3); MNRJ 51256(7); MNRJ 51712(1); MZUSP 26848(17); MZUSP 93961(8); *Deuterodon luetkenii*: MCP 20487(3); *Deuterodon taeniatus*: MNRJ 15051(5); *Eigenmannia virescens*: MNRJ 19623(4); *Geophagus brasiliensis*: MCP 20178(18); MNRJ 13732(6); MNRJ 14965(25); MNRJ 14993(3); MNRJ 18000(1); MNRJ 19416(2); MNRJ 26662(27); MNRJ 27732(2); MNRJ 27740(2); MNRJ 27752(1); MNRJ 27777(3); MNRJ 27785(5); MNRJ 27798(1); MNRJ 27808(4); MNRJ 27815(12); MNRJ 27985(3); MNRJ 37054(1); MNRJ 37072(1); MNRJ 37107(2); MNRJ 38238(1); MNRJ 38257(1); MNRJ 43538(319); MNRJ 46846(1); MNRJ 47203(8); MNRJ 47249(20); MNRJ 48180(7); MNRJ 48188(5); MNRJ 48608(1); MNRJ 48621(7); MNRJ 51217(16); MNRJ 51234(4); MNRJ 51255(6); MNRJ 51267(6); MNRJ 52322(1); MNRJ 52332(2); MZUSP 26849(10); MZUSP 93843(11); UFRGS 18837(8); *Gymnotus carapo*: MNRJ 13731(1); MNRJ 26642(3); MNRJ 48185(1); MNRJ 48605(1); MNRJ 48619(1); MNRJ 51213(1); *Gymnotus pantherinus*: MCP 20663(1); MNRJ 13747(3); MNRJ 22133(1); MNRJ 26640(5); MNRJ 38245(2); MNRJ 46844(7); MNRJ 46845(1); MNRJ 47204(1); MNRJ 51808(1); MZUSP 91074(1); MZUSP 91075(3); *Hisonotus notatus*: MCP 20822(3); MNRJ 13737(31); MNRJ 14856(17); MNRJ 15741(124); MNRJ 17993(42); MNRJ 19386(15); MNRJ 20346(50); MNRJ 37099(75); MNRJ 43534(48); MNRJ 47240(6); MNRJ 52326(12); MZUSP 94026(86); MZUSP 121258(70); UFRGS 18838(20); *Homodiaetus passarellii*: MCP 18737(3); MNRJ 14859(2); MNRJ 22114(2); MZUSP 93876(9); *Hoplias malabaricus*: MNRJ 13504(1); MNRJ 14963(1); MNRJ 15091(1); MNRJ 26657(1); MNRJ 27983(1); MNRJ 37038(1); MNRJ 43543(1); MNRJ 46840(2); MNRJ 51208(1); MZUSP 26850(2); *Hyphessobrycon bifasciatus*: MNRJ 15055(7); MNRJ 37040(2); MNRJ 51206(1); MZUSP 26851(3); *Hyphessobrycon boulengeri*: MNRJ 37041(1); MNRJ 46838(33); *Hyphessobrycon eques*: MNRJ 48614(3); MNRJ 51207(13); *Hypostomus punctatus*: MNRJ 13550(22); MNRJ 13738(15); MNRJ 13753(1); MNRJ 14860(6); MNRJ 15059(1); MNRJ 22119(1); MNRJ 24779(1); MNRJ 26644(2); MNRJ 27750(1); MNRJ 37069(10); MNRJ 37102(1); MNRJ 38251(1); MNRJ 43531(1); MNRJ 47195(36); MNRJ 47239(9); MNRJ 48601(1); MNRJ 48617(3); MNRJ 51209(1); MNRJ 51229(1); MNRJ 51244(3); MZUSP 26852(5); MZUSP 26853(1); MZUSP 94032(1); MZUSP 94033(2); *Kronichthys heylandi*: MCP 20149(5); MCP 26141(11); MCP 26525(15); MNRJ 26653(5); MNRJ 37087(1); MNRJ 37100(2); MNRJ 43532(5); MNRJ 51269(1); MZUSP 26854(2); *Listrura nematopteryx*: UFRJ 9279(37); UFRJ 9691(3); *Loricariichthys castaneus*: MNRJ 21660(1); MNRJ 38255(2); MNRJ 47241(5); MZUSP 26855(1); *Microcambeva bendego*: MNRJ 48616(2); MNRJ 51222(1); MNRJ 52042(1); MZUSP 125789(3); *Microglanis nigripinnis*: MNRJ 12170(1); MNRJ 12171(1); MNRJ 19970(7); MNRJ 37062(4); MZUSP 42308(1); MZUSP 42309(1); *Mimagoniates microlepis*: MCP 23654(9); MCP 23655(2); MCP 26131(4); MNRJ 11584(10); MNRJ 13752(33); MNRJ 14994(5); MNRJ 15061(5); MNRJ 22124(1); MNRJ 26651(8); MNRJ 26668(6); MNRJ 27733(6); MNRJ 27801(1); MNRJ 27976(1); MNRJ 37059(7); MNRJ 37089(1); MNRJ 38230(1); MNRJ 43523(232); MNRJ 46839(54); MNRJ 50649(1); MNRJ 51227(6); MNRJ 51240(8); MNRJ 51258(57); MNRJ 51796(15); MNRJ 52319(10); MZUSP 14668(4); MZUSP 26856(6); MZUSP 26895(43); MZUSP 93874(27); MZUSP 118711(23); UFRGS 18833(77); UFRGS 18846(48); UFRGS 19048(3); USNM 35323(1); USNM 249896(17); USNM 254255(40); USNM 362361(13); USNM 362365(13); Não identificada: USNM 331101(3); *Neoplecostomus microps*: DZSJRP 20664(6); DZSJRP 21085(2); DZSJRP 21086(6); MCP 26140(3); MCP 27357(1); MNRJ

26659(4); MNRJ 27793(3); MNRJ 27796(1); MNRJ 38217(5); MNRJ 48594(4); MNRJ 50714(1); MNRJ 51204(1); MNRJ 51276(10); MZUSP 121367(1); *Oligosarcus hepsetus*: MNRJ 27811(2); MNRJ 27977(6); MNRJ 38231(1); MNRJ 43522(11); MNRJ 47236(1); MNRJ 48613(1); MNRJ 51221(5); MZUSP 26857(3); *Ophichthus gomesii*: MZUSP 12089(1); *Oreochromis niloticus*: MNRJ 43537(2); MNRJ 48547(1); *Otocinclus affinis*: USNM 235076(7); *Otothyris lophophanes*: MNRJ 25891(2); MNRJ 38232(2); *Pareiorhaphis garbei*: MCP 26524(10); MNRJ 27972(3); MNRJ 27982(1); MNRJ 38218(10); MNRJ 38223(2); MNRJ 43510(1); MNRJ 48593(43); MNRJ 48632(23); MNRJ 51196(30); MNRJ 51202(28); MNRJ 51275(10); MNRJ 51371(3); *Parotocinclus maculicauda*: MCP 20075(6); MCP 26133(1); MNRJ 11581(29); MNRJ 13736(10); MNRJ 13745(65); MNRJ 14845(35); MNRJ 19385(8); MNRJ 20347(8); MNRJ 21656(2); MNRJ 22116(16); MNRJ 22125(8); MNRJ 22272(2); MNRJ 26648(46); MNRJ 26660(3); MNRJ 27736(16); MNRJ 27778(8); MNRJ 27804(1); MNRJ 27822(1); MNRJ 37068(15); MNRJ 37101(4); MNRJ 38233(1); MNRJ 38252(16); MNRJ 43533(36); MNRJ 46848(1); MNRJ 47197(26); MNRJ 47242(24); MNRJ 48175(11); MNRJ 48599(17); MNRJ 48618(8); MNRJ 51210(27); MNRJ 51231(26); MNRJ 51248(9); MNRJ 51264(1); MNRJ 51799(10); MNRJ 52328(1); MZUSP 26858(6); MZUSP 94012(25); MZUSP 121260(39); UFRGS 20105(1); *Phalloceros leptokeras*: MCP 20585(28); MCP 29413(1); MCP 30408(1); MNRJ 13734(8); MNRJ 13750(13); MNRJ 19387(2); MNRJ 26658(4); MNRJ 26672(28); MNRJ 27731(1); MNRJ 27744(7); MNRJ 27816(2); MNRJ 27980(20); MNRJ 27986(65); MNRJ 37044(34); MNRJ 37053(20); MNRJ 37071(2); MNRJ 37106(1); MNRJ 38237(6); MNRJ 39633(2); MNRJ 39634(3); MNRJ 42926(8); MNRJ 43600(270); MNRJ 43601(2); MNRJ 46847(65); MNRJ 48545(7); MNRJ 48627(3); MNRJ 50654(1); MNRJ 50830(3); MNRJ 50832(3); MNRJ 50833(3); MNRJ 50834(3); MNRJ 50835(3); MNRJ 51251(1); MNRJ 51252(7); MNRJ 51266(16); MNRJ 51279(2); MNRJ 51354(1); MNRJ 51809(78); MNRJ 52321(15); MNRJ 52331(5); MZUSP 26859(34); MZUSP 93987(5); UFRGS 18845(16); USNM 309773(3); *Pimelodella lateristriga*: MNRJ 11754(3); MNRJ 13748(5); MNRJ 13759(8); MNRJ 14948(6); MNRJ 14958(3); MNRJ 19395(1); MNRJ 22118(2); MNRJ 26665(1); MNRJ 27745(1); MNRJ 27809(2); MNRJ 37061(2); MNRJ 38247(7); MNRJ 46841(3); MNRJ 47251(2); MNRJ 48602(4); MNRJ 51211(1); MNRJ 51265(4); MNRJ 51807(1); MZUSP 26860(17); MZUSP 118292(1); *Poecilia reticulata*: MCP 20592(93); MCP 20593(7); MNRJ 13751(3); MNRJ 14853(13); MNRJ 27753(4); MNRJ 28923(25); MNRJ 37070(1); MNRJ 37105(3); MNRJ 43539(563); MNRJ 47201(18); MNRJ 47246(1); MNRJ 48177(5); MNRJ 51214(2); MNRJ 51232(3); MNRJ 51253(7); MNRJ 52330(65); UFRGS 18835(3); UFRGS 18842(62); UNT 9753(10); *Poecilia vivipara*: MNRJ 14857(30); MNRJ 15132(21); MNRJ 15134(16); MNRJ 27751(1); MNRJ 38227(10); MNRJ 48626(20); MNRJ 50655(1); MNRJ 51215(30); MZUSP 93995(5); *Pseudotothyris janeirensis*: MNRJ 26650(4); MNRJ 52327(3); *Pyrrhulina australis*: MNRJ 19994(2); MNRJ 48624(5); MNRJ 51220(1); *Rhamdia quelen*: MCP 20634(6); MCP 20637(1); MCP 43307(3); MNRJ 13730(5); MNRJ 13746(4); MNRJ 14962(12); MNRJ 22115(1); MNRJ 22127(1); MNRJ 27730(4); MNRJ 27791(3); MNRJ 27978(5); MNRJ 37047(24); MNRJ 37060(3); MNRJ 37093(11); MNRJ 38215(1); MNRJ 38249(1); MNRJ 43525(3); MNRJ 46842(3); MNRJ 47193(1); MNRJ 47238(1); MNRJ 48182(1); MNRJ 48603(2); MNRJ 51212(1); MNRJ 51250(2); MNRJ 51746(1); MZUSP 26863(1); MZUSP 93849(5); *Rhamdioglanis frenatus*: MCP 20640(1); MCP 26132(2); MNRJ 19603(2); MNRJ 26636(3); MNRJ 38226(1); MNRJ 51806(2); *Rhamdioglanis transfasciatus*: MNRJ 51198(3); MNRJ 51203(4); MNRJ 51278(7); MZUSP 26862(3); *Rineloricaria nudipectoris*: MCP 20136(3); MCP 20137(7); MCP 20142(8); MCP 26134(1); MCP 26142(2); MCP 43288(4); MCP 43291(2); MNRJ 11755(5); MNRJ 13735(3); MNRJ 13741(12); MNRJ 13742(26); MNRJ 14028(3); MNRJ 14844(184); MNRJ 15126(41); MNRJ 15144(11); MNRJ 15687(1); MNRJ 19393(1); MNRJ 19621(7); MNRJ 22121(31); MNRJ 22128(3); MNRJ 23829(6); MNRJ 23830(4); MNRJ 23831(17); MNRJ 23832(2); MNRJ 26647(1); MNRJ 26663(2); MNRJ 26664(2); MNRJ 27737(3); MNRJ 27749(1); MNRJ 27780(2); MNRJ 27781(4); MNRJ 27805(4); MNRJ 27818(1); MNRJ 27825(2); MNRJ 27826(3); MNRJ 37051(6); MNRJ 37067(9); MNRJ 37085(1); MNRJ 37103(12); MNRJ 38254(12); MNRJ 43536(14); MNRJ 45635(11); MNRJ 46849(2); MNRJ 47198(107); MNRJ 47199(9); MNRJ 47243(24); MNRJ 47244(4); MNRJ 48176(6); MNRJ 48350(1); MNRJ 48493(9); MNRJ 48495(5); MNRJ 48543(5); MNRJ 48600(13); MNRJ 48628(1); MNRJ 49345(1); MNRJ 50053(25); MNRJ 50651(2); MNRJ 50652(2); MNRJ 51223(4); MNRJ 51230(24); MNRJ 51246(34); MNRJ 51247(13); MNRJ 51262(5); MNRJ 51263(2); MNRJ 51376(1); MNRJ 51801(1); MNRJ 51802(2); MNRJ 52324(10); MZUSP 14121(7); MZUSP 14124(1); MZUSP 14129(2); MZUSP 14131(1); MZUSP 26864(4); MZUSP 26867(2); MZUSP 93910(74); MZUSP 121259(19); UFRGS 18836(5); USNM 257424(1); *Schizolecis guentheri*: DZSRP 20665(1); MCP 20094(8); MCP 20124(40); MCP 26139(44); MCP 43308(8); MNRJ 13744(63); MNRJ 14861(21); MNRJ 15064(6); MNRJ 19606(4); MNRJ 19609(6); MNRJ 21655(21); MNRJ 22120(2); MNRJ 22132(1); MNRJ 26639(15); MNRJ 26649(1); MNRJ 26661(8); MNRJ 27726(14); MNRJ 27735(7); MNRJ 27766(8); MNRJ 27770(5); MNRJ 27775(4); MNRJ 27788(2); MNRJ 27789(10); MNRJ 27803(3); MNRJ 27823(1); MNRJ 27827(1); MNRJ 27971(2); MNRJ 27975(1); MNRJ 37052(34); MNRJ 37066(2); MNRJ 37086(1); MNRJ 37104(33); MNRJ 38219(17); MNRJ 38224(54); MNRJ 38240(1); MNRJ 38253(5); MNRJ 40299(1); MNRJ 43535(28); MNRJ 47196(2); MNRJ 48595(13); MNRJ 50653(6); MNRJ 51197(2); MNRJ 51249(3); MNRJ 51277(6); MNRJ 51800(4); MNRJ 52325(5); MZUSP 26865(5); MZUSP 94017(91); MZUSP

121261(16); MZUSP 121365(4); UFRGS 18831(2); UFRGS 18840(1); UFRGS 20104(10); *Scleromystax barbatus*: MCP 20651(16); MCP 26137(1); MCP 44587(5); MNRJ 13740(16); MNRJ 14795(6); MNRJ 14843(29); MNRJ 15394(4); MNRJ 22113(1); MNRJ 22122(2); MNRJ 26666(15); MNRJ 27738(41); MNRJ 27779(8); MNRJ 27802(12); MNRJ 27810(2); MNRJ 27981(4); MNRJ 37064(1); MNRJ 37097(3); MNRJ 38246(2); MNRJ 43529(22); MNRJ 47192(8); MNRJ 47245(3); MNRJ 48173(4); MNRJ 48544(3); MNRJ 50650(6); MNRJ 51228(6); MNRJ 51245(9); MNRJ 51803(13); MNRJ 52329(5); MZUSP 93875(35); MZUSP 121264(1); UFRGS 18832(19); UFRGS 18839(1); UFRGS 18841(1); *Spintherobolus broccae*: MCP 19196(8); MNRJ 26655(3); USNM 287324(45); *Synbranchus marmoratus*: MNRJ 13739(1); MNRJ 27799(1); MNRJ 27820(1); MNRJ 38236(1); MNRJ 47205(1); MNRJ 48178(1); MNRJ 48609(1); MZUSP 26866(1); MZUSP 121263(1); *Trichomycterus nigricans*: MCP 20607(2); MNRJ 13749(4); MNRJ 14949(4); MNRJ 14953(2); MNRJ 19610(2); MNRJ 21004(2); MNRJ 24216(3); MNRJ 26641(2); MNRJ 27728(1); MNRJ 27765(1); MNRJ 27767(1); MNRJ 27771(1); MNRJ 27776(3); MNRJ 27795(2); MNRJ 27973(1); MNRJ 37049(5); MNRJ 37094(5); MNRJ 37095(1); MNRJ 38220(2); MNRJ 38221(5); MNRJ 38235(1); MNRJ 38250(1); MNRJ 43527(8); MNRJ 47200(3); MNRJ 48184(1); MNRJ 48596(1); MNRJ 48606(1); MNRJ 48610(1); MNRJ 48631(4); MNRJ 51195(5); MNRJ 51200(5); MNRJ 51236(1); MNRJ 51242(12); MNRJ 51268(1); MNRJ 51280(7); MNRJ 51372(2); MNRJ 51377(2); MNRJ 51805(2); MZUSP 93878(21); MZUSP 121364(2); *Trichopodus trichopterus*: MNRJ 48625(7).

### **Microbacias da Baía de Guanabara**

Município de Duque de Caxias:

*Acentronichthys leptos*: MCP 44202(2); MNRJ 43346(6); MNRJ 43360(5); MNRJ 43373(1); MNRJ 43375(2); MNRJ 43723(2); MNRJ 46979(1); *Ancistrus multispinis*: MCP 44168(1); MCP 44198(1); MNRJ 43349(2); MNRJ 43355(2); MNRJ 43364(3); MNRJ 43382(5); MNRJ 43395(5); MNRJ 45312(1); MNRJ 45318(1); MNRJ 45323(1); MNRJ 45329(3); MNRJ 45335(1); MNRJ 46983(14); *Aphyocharax anisitsi*: MNRJ 5585(1); *Astyanax keronolepis*: MNRJ 10983(1); MNRJ 43358(2); MNRJ 51722(9); *Astyanax lacustris*: MNRJ 43388(1); *Bryconamericus ornaticeps*: MCP 44154(6); MNRJ 41680(8); MNRJ 43372(1); MNRJ 43374(3); MNRJ 43915(5); MNRJ 45314(45); MNRJ 45321(9); MNRJ 45325(36); MNRJ 46977(6); *Callichthys callichthys*: MNRJ 8963(1); *Characidium grajahuense*: MNRJ 43352(3); MNRJ 45315(1); MNRJ 45326(2); MNRJ 46978(2); *Characidium interruptum*: MNRJ 5433(1); MNRJ 5434(1); MNRJ 5435(1); MNRJ 5436(1); MNRJ 5437(1); MNRJ 5438(1); MNRJ 5439(1); MNRJ 5531(1); MNRJ 5532(1); MNRJ 5533(1); MNRJ 5534(1); MNRJ 5535(1); MNRJ 5536(1); MNRJ 5537(1); MNRJ 5538(1); MNRJ 5539(1); MNRJ 5540(1); MNRJ 5541(1); MNRJ 5542(1); MNRJ 5543(1); MNRJ 15046(12); *Crenicichla lepidota*: MNRJ 43401(4); *Deuterodon hastatus*: MCP 44164(9); MNRJ 4077(84); MNRJ 20845(12); MNRJ 43345(3); MNRJ 43357(17); MNRJ 43387(108); MNRJ 43403(78); MNRJ 10985(2); *Deuterodon janeiroensis*: MNRJ 20844(2); *Eigenmannia virescens*: MNRJ 26039(3); *Geophagus brasiliensis*: MNRJ 3560(1); MNRJ 43370(13); MNRJ 43402(16); *Gymnotus carapo*: MNRJ 3561(1); *Gymnotus pantherinus*: MNRJ 6391(6); MNRJ 43368(2); MNRJ 45152(7); MNRJ 46986(2); *Hisonotus notatus*: MNRJ 43726(1); MZUSP 42132(6); *Homodiaetus passarellii*: MNRJ 3783(1); MNRJ 3784(3); *Hoplerethrinus unitaeniatus*: MNRJ 20905(3); *Hoplosternum littorale*: MNRJ 6390(1); *Hyphessobrycon bifasciatus*: MNRJ 10984(1); MNRJ 21120(1); *Hyphessobrycon boulengeri*: MNRJ 6243(15); MNRJ 20846(32); MNRJ 21114(3); *Hyphessobrycon flammeus*: MNRJ 20843(1); MNRJ 50046(16); *Hypostomus punctatus*: MNRJ 25665(1); MNRJ 43396(5); MNRJ 43724(1); MNRJ 50873(1); *Kronichthys heylandi*: MNRJ 43350(2); MNRJ 43356(1); MNRJ 43365(7); MNRJ 43377(2); MNRJ 43383(1); MNRJ 45330(2); MNRJ 46984(3); *Kryptolebias brasiliensis*: MNRJ 28874(6); *Leptolebias marmoratus*: CAS 36523(1); MCP 28604(1); MNRJ 4739(8); *Leptopanchax opalescens*: CAS 36521(1); MNRJ 6385(5); MNRJ 6389(12); *Listrura nematopteryx*: MNRJ 37022(1); USNM 285188(1); *Mimagoniates microlepis*: MCP 44160(16); MCP 44196(8); MNRJ 43359(15); MNRJ 43378(30); MNRJ 43390(4); MNRJ 43914(6); MNRJ 45310(6); MNRJ 45316(65); *Nannostomus beckfordi*: MNRJ 43389(1); Não identificada: MNRJ 1131(1); MNRJ 4717(5); MNRJ 4718(1); MNRJ 5128(3); MNRJ 5926(1); MNRJ 6383(110); *Neoplecostomus microps*: MNRJ 45324(5); MNRJ 45331(5); MNRJ 45334(11); *Otothyris lophophanes*: MNRJ 6386(4); *Parotocinclus maculicauda*: MCP 44161(1); MNRJ 43397(25); MZUSP 42131(6); *Phalloceros harpagos*: MCP 44174(2); *Phalloceros leptokeras*: MNRJ 43351(1); MNRJ 43369(33); MNRJ 43385(1); MNRJ 45313(2); MNRJ 46988(7); *Pimelodella lateristriga*: MNRJ 6388(2); MNRJ 43391(11); *Poecilia reticulata*: MCP 44159(1); MCP 44172(16); MNRJ 43386(14); MNRJ 43400(36); MNRJ 45319(23); UNT 10516(9); *Pseudotothyris janeirensis*: MNRJ 5925(1); *Rhamdia quelen*: MNRJ 43379(1); MNRJ 43392(2); MNRJ 45317(2); *Rhamdioglanis frenatus*: MNRJ 43347(6); MNRJ 43353(11); MNRJ 43361(1); MNRJ 45320(1); MNRJ 45327(8); MNRJ 45332(5); MNRJ 46980(4); *Rineloricaria nudipectoris*: MNRJ 5129(1); MNRJ 15492(2); MNRJ 43367(24); MNRJ 43371(10); MNRJ 43398(60); MNRJ 43399(6); MNRJ 43725(1); *Schizolecis guentheri*: MCP 44152(2); MCP 44153(3); MNRJ 6387(1); MNRJ 9938(1); MNRJ 9939(1); MNRJ 9940(1); MNRJ 9941(1); MNRJ 9942(1); MNRJ 9943(1); MNRJ 9944(1); MNRJ 9945(1); MNRJ 9946(1); MNRJ 9947(1); MNRJ 9948(1); MNRJ 9949(1); MNRJ 9950(1);

MNRJ 9951(1); MNRJ 9952(1); MNRJ 9953(1); MNRJ 9954(1); MNRJ 9955(1); MNRJ 9956(1); MNRJ 9957(1); MNRJ 9958(1); MNRJ 9959(1); MNRJ 43366(152); MNRJ 43384(7); MNRJ 46985(1); MNRJ 51373(2); MZUSP 42133(6); *Scleromystax barbatus*: MCP 44167(1); MNRJ 3562(1); MNRJ 3812(4); MNRJ 25661(2); MNRJ 43363(64); MNRJ 43381(4); MNRJ 43394(18); MNRJ 45311(1); MNRJ 46982(1); *Spintherobolus broccae*: MNRJ 5584(1); MNRJ 5586(1); MNRJ 6263(1); MNRJ 6264(64); MNRJ 6265(1); MNRJ 6266(4); MNRJ 20847(13); *Synbranchus marmoratus*: MNRJ 8917(1); MNRJ 41613(1); MNRJ 46987(1); *Trichomycterus nigricans*: MCP 44163(1); MNRJ 20882(16); MNRJ 25410(3); MNRJ 25660(2); MNRJ 43348(1); MNRJ 43354(46); MNRJ 43362(9); MNRJ 43376(10); MNRJ 43380(5); MNRJ 43393(6); MNRJ 43998(29); MNRJ 44003(5); MNRJ 44004(2); MNRJ 45322(3); MNRJ 45328(13); MNRJ 45333(26); MNRJ 46981(2); MNRJ 46989(174).

### **Microbacias da Baía de Guanabara**

Município de Guapimirim:

*Acentronichthys leptos*: MNRJ 20263(2); MNRJ 20284(2); MNRJ 40321(2); MNRJ 40425(1); *Achirus lineatus*: MBML 13738(1); MBML 13742(3); *Ancistrus multispinis*: MNRJ 17795(4); MNRJ 17804(4); MNRJ 17808(1); MNRJ 18097(1); MNRJ 20264(2); MNRJ 42554(1); *Astyanax keronolepis*: MNRJ 42570(1); UFRGS 18860(8); *Australoheros oblongus*: MNRJ 42556(1); MCP 42365(1); MNRJ 20278(1); MNRJ 20298(1); MNRJ 31925(1); MNRJ 42555(1); UFRGS 18856(4); *Awaous tajasica*: MNRJ 50162(1); MZUSP 66622(1); *Bryconamericus ornateiceps*: MNRJ 18025(4); MNRJ 20287(6); MNRJ 40317(21); MNRJ 40507(1); MNRJ 42542(9); UFRGS 18848(3); *Callichthys callichthys*: MNRJ 42553(1); USNM 100915(2); *Centropomus parallelus*: MBML 13749(2); MBML 13753(1); MNRJ 51874(1); MZUSP 71564(1); *Centropomus undecimalis*: MBML 12661(1); MBML 12664(13); MBML 12685(1); *Characidium interruptum*: MNRJ 17811(1); MNRJ 17813(7); *Characidium vidali*: MNRJ 9754(1); MNRJ 9755(1); MNRJ 9756(1); MNRJ 9757(1); MNRJ 9758(1); MNRJ 9759(1); MNRJ 9760(1); MNRJ 9761(1); MNRJ 9762(1); MNRJ 9763(1); MNRJ 12838(21); MNRJ 18094(15); MNRJ 20262(8); MNRJ 20270(1); MNRJ 20304(15); MNRJ 40284(56); MNRJ 40304(36); MNRJ 40336(14); *Clarias gariepinus*: MBML 12686(4); *Coptodon rendalli*: MBML 12659(7); *Corydoras nattereri*: MNRJ 20293(19); *Crenicichla lepidota*: MNRJ 42548(5); UFRGS 18855(1); *Cyphocharax gilbert*: MBML 12678(3); MBML 12681(3); MNRJ 39873(1); MNRJ 40428(1); MNRJ 51870(1); MZUSP 20847(14); *Deuterodon hastatus*: MBML 12655(3); MBML 12676(1); MBML 13252(4); MBML 13743(3); MNRJ 11059(1); MNRJ 11060(7); MNRJ 17801(71); MNRJ 17803(4); MNRJ 18093(3); MNRJ 18098(3); MNRJ 18937(98); MNRJ 19128(13); MNRJ 20271(4); MNRJ 20301(21); MNRJ 38805(14); MNRJ 40316(3); MNRJ 40335(1); MNRJ 40503(1); MNRJ 42539(2); MNRJ 42540(36); MNRJ 48264(4); MNRJ 51868(1); MZUSP 26593(48); UFRGS 18849(33); UFRGS 18859(2); UFRGS 22059(3); *Deuterodon janeiroensis*: MBML 12673(3); MNRJ 11014(1); MNRJ 18026(48); MNRJ 20285(1); MNRJ 40426(1); *Deuterodon luetkenii*: MBML 12668(16); MNRJ 40427(2); MNRJ 40506(2); *Diapterus rhombeus*: MBML 13737(3); MBML 13745(3); MBML 13754(1); *Elops saurus*: MBML 12651(1); MBML 12665(6); MBML 13741(1); MBML 13747(1); *Etropus crossotus*: MBML 12672(1); *Eugerres brasiliensis*: MBML 12670(1); *Genidens genidens*: MBML 13744(7); *Geophagus brasiliensis*: MBML 12653(8); MBML 12660(8); MBML 12666(7); MBML 12677(2); MBML 12682(3); MBML 13249(1); MBML 13251(1); MBML 13736(6); MNRJ 17796(4); MNRJ 17809(1); MNRJ 18092(3); MNRJ 20297(3); MNRJ 40329(1); MNRJ 40504(1); MNRJ 42549(31); MZUSP 44887(36); UFRGS 18852(3); *Gobionellus oceanicus*: MBML 12662(1); *Gymnotus carapo*: MNRJ 18029(1); UFRGS 18853(12); *Gymnotus pantherinus*: MNRJ 40327(1); MNRJ 42551(3); *Hisonotus notatus*: MNRJ 18033(2); MNRJ 20286(1); MNRJ 40326(4); UFRGS 18851(1); *Homodiaetus passarellii*: MNRJ 20290(3); MNRJ 40332(7); *Hoplerythrinus unitaeniatus*: MZUSP 105203(1); *Hoplias malabaricus*: MBML 12654(2); MBML 12683(2); MNRJ 17794(1); MNRJ 18031(1); MNRJ 20288(1); MNRJ 40421(1); MZUSP 22967(1); *Hoplosternum littorale*: MBML 12656(2); MBML 12680(4); MBML 13250(2); MBML 13253(9); MBML 13751(5); MNRJ 51879(1); *Hyphessobrycon bifasciatus*: MNRJ 18022(5); *Hyphessobrycon boulengeri*: MNRJ 42541(3); UFRGS 18866(8); *Hyphessobrycon eques*: UFRGS 18857(1); *Hypomasticus copelandii*: MNRJ 41137(1); MNRJ 41138(1); MNRJ 41139(1); MNRJ 41140(1); MNRJ 41141(1); MNRJ 41142(1); *Hypostomus punctatus*: MBML 12650(1); MNRJ 18099(1); MNRJ 20269(3); MNRJ 20292(2); MNRJ 39888(1); MNRJ 40318(2); MNRJ 40429(3); MNRJ 40430(1); MNRJ 40501(1); MNRJ 40502(1); MNRJ 41133(1); MNRJ 41134(1); MNRJ 41135(1); MNRJ 41136(1); *Imparfinis piperatus*: MNRJ 20273(1); *Loricariichthys castaneus*: MBML 12649(4); MBML 13750(1); MNRJ 39886(1); MNRJ 51881(1); *Microglanis nigripinnis*: MNRJ 18028(1); *Microphis lineatus*: MNRJ 45160(1); *Micropogonias furnieri*: MBML 12663(1); MBML 12674(1); MBML 13739(2); MBML 13748(2); MBML 13755(1); *Mimagoniates microlepis*: MNRJ 17798(4); MNRJ 17806(5); MNRJ 19129(1); MNRJ 39890(1); MNRJ 40315(1); MNRJ 40334(4); MNRJ 40424(1); MNRJ 42550(2); UFRGS 18850(4); *Mugil curema*: MBML 12667(5); MBML 12684(1); *Mugil liza*: MNRJ 51873(1); *Neoplecostomus microps*: MNRJ 17799(1); MNRJ 18096(1); MNRJ 21658(1); MNRJ 40306(1); MNRJ 40337(1); *Oligosarcus hepsetus*: MBML 12671(1); MBML 12679(2); MNRJ 18023(3); MNRJ

51869(1); MZUSP 4766(1); MZUSP 4767(1); MZUSP 4768(1); MZUSP 4769(1); UFRGS 18858(1); *Oreochromis niloticus*: MBML 13740(2); MBML 13752(3); MNRJ 51877(1); *Otothyris lophophanes*: MNRJ 9989(1); MNRJ 40323(1); *Pareiorhaphis garbei*: MCP 43597(6); MNRJ 12839(4); MNRJ 17810(1); MNRJ 20268(4); MNRJ 20303(2); MNRJ 40285(22); MNRJ 40305(8); *Parotocinclus maculicauda*: MNRJ 18100(5); MNRJ 20276(8); MNRJ 20291(2); MNRJ 22273(3); MNRJ 39889(1); MNRJ 40319(16); MNRJ 42543(41); *Phalloceros harpagos*: UFRGS 18854(12); *Phalloceros leptokeras*: MNRJ 17800(13); MNRJ 17807(2); MNRJ 18027(19); MNRJ 20266(3); MNRJ 20283(2); MNRJ 20296(25); MNRJ 40308(21); MNRJ 40330(19); MNRJ 40339(21); MNRJ 40420(2); MNRJ 42547(13); MNRJ 50831(3); *Pimelodella lateristriga*: MNRJ 18030(1); MNRJ 20272(4); MNRJ 20299(2); MNRJ 40331(1); MNRJ 42546(4); MZUSP 22965(53); *Poecilia reticulata*: MNRJ 20267(3); *Poecilia vivipara*: MBML 12652(1); MBML 12657(1); MBML 12669(2); MBML 13746(1); MNRJ 39887(5); MNRJ 40422(8); MZUSP 64142(4); *Psalidodon parahybae*: MNRJ 42538(3); *Pseudotothyris janeirensis*: MZUSP 42409(1); *Rhamdia quelen*: MNRJ 17793(1); MNRJ 18032(1); MNRJ 20282(1); MNRJ 42545(5); MNRJ 51880(1); MZUSP 22964(4); *Rhamdioglanis frenatus*: MNRJ 18095(1); *Rhamdioglanis transfasciatus*: MNRJ 20305(7); *Rineloricaria nudipectoris*: MNRJ 17797(5); MNRJ 18024(1); MNRJ 20274(3); MNRJ 20279(5); MNRJ 20289(1); MNRJ 20300(3); MNRJ 40325(2); MNRJ 42451(1); MNRJ 42544(4); MNRJ 48371(1); *Schizolecis guentheri*: MNRJ 19381(3); MNRJ 19383(4); MNRJ 20265(1); MNRJ 20281(12); MNRJ 20295(7); MNRJ 21657(1); MNRJ 28228(2); MNRJ 40322(75); MNRJ 40338(6); MZUSP 42410(1); *Scleromystax barbatus*: MNRJ 17802(10); MNRJ 17812(6); MNRJ 20275(1); MNRJ 20294(11); MNRJ 40320(20); MNRJ 42552(4); MZUSP 22966(1); UFRGS 18847(2); *Synbranchus marmoratus*: MNRJ 30420(1); MNRJ 40328(1); MNRJ 42557(1); *Trachelyopterus striatulus*: MNRJ 51878(1); MZUSP 59022(1); *Trichomycterus jacupiranga*: MNRJ 17805(1); MNRJ 40307(24); MNRJ 40324(10); *Trichomycterus nigricans*: MNRJ 20261(6); MNRJ 20277(1); MNRJ 20280(1); MNRJ 20302(2); MBML 12658(1); *Trichopsis vittata*: MNRJ 40423(3); MNRJ 40505(1); *Trinectes paulistanus*: MBML 12675(2).

#### **Microbacias da Baía de Guanabara**

Município de Itaboraí:

*Astyanax lacustris*: MNRJ 39878(3); MNRJ 39896(8); MNRJ 40512(1); MNRJ 42178(2); MZUSP 1665(1); *Callichthys callichthys*: MNRJ 39376(1); MZUSP 2184(1); *Characidium interruptum*: MNRJ 39864(1); *Characidium vidali*: MNRJ 40518(3); *Crenicichla lepidota*: MNRJ 51875(1); *Cyphocharax gilbert*: MZUSP 1659(1); MZUSP 1747(7); *Deuterodon hastatus*: MNRJ 37506(1); MNRJ 37767(1); MNRJ 38195(1); MNRJ 38196(1); MNRJ 38203(4); MNRJ 38204(3); MNRJ 38212(4); MNRJ 39897(2); MNRJ 39898(3); MNRJ 39904(2); MNRJ 39913(5); MNRJ 40418(1); MNRJ 40439(3); MNRJ 42569(7); MZUSP 16379(4); *Deuterodon luetkenii*: MNRJ 40511(3); MNRJ 40520(1); MNRJ 51867(1); *Geophagus brasiliensis*: MNRJ 38199(2); MNRJ 38210(2); MNRJ 39865(1); MNRJ 40431(2); MNRJ 51876(1); *Gymnotus carapo*: MNRJ 41577(1); MNRJ 51872(1); *Hemipsilichthys gobio*: MZUSP 2107(1); *Hoplerethrinus unitaeniatus*: MZUSP 1287(1); MZUSP 2053(8); *Hoplias malabaricus*: MNRJ 37036(1); MNRJ 38201(1); MNRJ 38202(1); MNRJ 39874(1); MNRJ 39903(1); MNRJ 51871(1); MZUSP 1519(2); *Hoplosternum littorale*: MNRJ 39871(5); *Hyphessobrycon bifasciatus*: MNRJ 37035(1); MNRJ 38205(4); MNRJ 39876(1); MNRJ 39877(7); MNRJ 39895(2); MNRJ 40432(2); MNRJ 40510(5); MNRJ 39381(2); *Hypomasticus copelandii*: MNRJ 40442(1); MNRJ 51866(3); MZUSP 3614(2); *Hypostomus punctatus*: MNRJ 37037(1); MNRJ 37507(1); MNRJ 38206(1); MNRJ 39880(2); MNRJ 39902(7); MNRJ 39916(1); MNRJ 40433(1); MNRJ 40436(1); MNRJ 40443(1); *Kronichthys heylandi*: MNRJ 39867(7); *Kryptolebias brasiliensis*: MNRJ 39940(1); *Loricariichthys castaneus*: MNRJ 39863(1); MNRJ 39906(1); *Microglanis nigripinnis*: MNRJ 39915(1); *Oligosarcus hepsetus*: MNRJ 40434(2); MNRJ 40508(4); MNRJ 40515(8); *Oreochromis niloticus*: MNRJ 38200(3); MNRJ 39892(3); *Parotocinclus maculicauda*: MNRJ 39894(2); MNRJ 39905(3); MNRJ 39907(4); MNRJ 39909(1); MNRJ 39912(7); *Phalloceros harpagos*: MNRJ 38208(6); MNRJ 39382(24); *Phalloceros leptokeras*: MNRJ 40441(1); *Pimelodella lateristriga*: MZUSP 2254(1); *Poecilia reticulata*: MNRJ 39375(2); *Poecilia vivipara*: MNRJ 37508(25); MNRJ 37768(4); MNRJ 38209(6); MNRJ 39374(9); MNRJ 39866(7); MNRJ 39875(29); MNRJ 39879(3); MNRJ 39891(108); MNRJ 39899(9); MNRJ 39910(5); MNRJ 39914(8); MNRJ 40417(50); MNRJ 40435(34); MNRJ 40438(1); MNRJ 40509(4); MNRJ 40513(29); MNRJ 40517(1); *Polycentrus schomburgkii*: MNRJ 39377(3); MNRJ 39380(4); MNRJ 40419(1); *Pyrrhulina australis*: MNRJ 40521(1); *Rhamdia quelen*: MNRJ 38211(1); MNRJ 39868(2); MNRJ 40437(2); MNRJ 40516(1); MNRJ 40519(3); MNRJ 41132(1); MZUSP 2238(1); *Rineloricaria nudipectoris*: MNRJ 38197(1); MNRJ 38207(1); *Schizolecis guentheri*: MNRJ 39893(1); MNRJ 39908(5); MNRJ 40440(4); *Scleromystax barbatus*: MNRJ 40481(1); *Synbranchus marmoratus*: MNRJ 38198(1); *Trichomycterus nigricans*: MNRJ 39869(1); *Trichopodus trichopterus*: MNRJ 39911(2); MNRJ 40444(2); MNRJ 40514(2).

#### **Microbacias da Baía de Guanabara**

Município de Magé:

*Acentronichthys leptos*: MNRJ 15063(1); MNRJ 31221(4); MNRJ 31227(2); MNRJ 31601(7); MNRJ 31613(2); MNRJ 49058(2); *Achirus lineatus*: MNRJ 8673(1); MNRJ 20033(1); *Ancistrus multispinis*: MNRJ 14793(9); MNRJ 17693(1); MNRJ 17697(12); MNRJ 17699(1); MNRJ 31225(11); MNRJ 31238(6); MNRJ 31252(6); MNRJ 31260(3); MNRJ 41509(5); MNRJ 46383(1); *Apistogramma cacatuoides*: MNRJ 17692(2); MNRJ 33091(4); MNRJ 41530(2); MNRJ 41539(1); *Astyanax keronolepis*: MNRJ 31219(158); MNRJ 31237(47); MNRJ 31248(16); MNRJ 50721(3); *Astyanax lacustris*: MNRJ 51811(4); MNRJ 52312(53); *Australoheros oblongus*: MNRJ 15006(3); MNRJ 39010(2); *Awaous tajasica*: MNRJ 14794(4); MNRJ 31234(1); MNRJ 31265(1); MNRJ 41527(2); *Brachyhypopomus janeiroensis*: SU 36964(1); *Bryconamericus ornaticeps*: MNRJ 17698(6); MNRJ 18276(19); MNRJ 31242(3); MNRJ 31249(3); MNRJ 31254(8); MNRJ 41513(27); *Callichthys callichthys*: MNRJ 28080(1); MNRJ 31609(1); MNRJ 40465(2); MZUSP 63479(4); *Characidium grajahuense*: MNRJ 11689(4); MNRJ 19116(2); *Characidium interruptum*: MNRJ 3816(3); MNRJ 5425(1); MNRJ 5426(1); MNRJ 5440(1); MNRJ 5449(1); MNRJ 5450(1); MNRJ 5451(1); MNRJ 5452(1); MNRJ 5453(1); MNRJ 5454(1); MNRJ 5455(1); MNRJ 5456(1); MNRJ 5457(1); MNRJ 5458(1); MNRJ 5459(1); MNRJ 5460(1); MNRJ 5461(1); MNRJ 5462(1); MNRJ 5463(1); MNRJ 5464(1); MNRJ 5465(1); MNRJ 5466(1); MNRJ 5467(1); MNRJ 5546(1); MNRJ 5547(1); MNRJ 38991(6); *Characidium vidali*: MNRJ 31220(45); MNRJ 31224(112); MNRJ 31231(20); MNRJ 31247(8); MNRJ 31599(4); *Corydoras nattereri*: MNRJ 14862(4); MNRJ 14951(4); MNRJ 14952(1); MNRJ 31257(1); MNRJ 31603(1); MNRJ 39001(18); MNRJ 41520(30); MNRJ 51813(1); *Crenicichla lepidota*: MNRJ 15018(3); MNRJ 41531(5); *Cyphocharax gilbert*: MNRJ 10907(3); MNRJ 13512(1); *Deuterodon hastatus*: MNRJ 6179(4); MNRJ 11008(1); MNRJ 11022(1); MNRJ 14991(1); MNRJ 18005(4); MNRJ 19127(1); MNRJ 19413(6); MNRJ 31600(2); MNRJ 35726(28); MNRJ 38993(149); MNRJ 41516(1); MNRJ 41517(87); MNRJ 41537(2); MNRJ 51812(17); MNRJ 52313(81); *Deuterodon janeiroensis*: MNRJ 38994(38); MNRJ 38995(2); MNRJ 50720(1); *Geophagus brasiliensis*: MNRJ 15007(8); MNRJ 15013(2); MNRJ 15019(26); MNRJ 17861(1); MNRJ 31233(1); MNRJ 31253(1); MNRJ 31264(11); MNRJ 31608(1); MNRJ 39011(15); MNRJ 41532(2); MNRJ 52315(2); *Gymnotus carapo*: MNRJ 14792(11); MNRJ 14956(1); MNRJ 39008(1); MNRJ 40464(1); *Gymnotus pantherinus*: MNRJ 31595(1); *Hisonotus notatus*: MNRJ 15058(1); MNRJ 17703(44); MNRJ 39003(7); MNRJ 41522(3); *Homodiaetus passarellii*: MNRJ 41519(8); UFRJ 7128(9); *Hoplerethrinus unitaeniatus*: MNRJ 1134(2); *Hoplias malabaricus*: MNRJ 31598(2); MNRJ 31616(1); MNRJ 38992(2); MNRJ 41518(1); *Hoplosternum littorale*: MNRJ 40453(1); MNRJ 40466(1); MNRJ 40471(1); MNRJ 40739(1); *Hyphessobrycon bifasciatus*: MNRJ 39013(1); *Hyphessobrycon boulengeri*: MNRJ 14989(1); MNRJ 14990(1); MNRJ 38996(16); MNRJ 40458(21); MNRJ 40474(2); *Hyphessobrycon flammeus*: MNRJ 8795(15); *Hypostomus punctatus*: MNRJ 8693(1); MNRJ 15056(1); MNRJ 17694(2); MNRJ 31239(2); MNRJ 31251(1); MNRJ 31605(1); MNRJ 39004(2); MNRJ 31262(2); *Kryptolebias brasiliensis*: MNRJ 10971(9); MNRJ 31610(63); MNRJ 31614(10); MNRJ 40454(5); MNRJ 40459(2); MNRJ 40468(7); MNRJ 41533(1); *Leptopanchax opalescens*: CAS 36522(6); MNRJ 3845(5); MNRJ 11301(3); *Leptopanchax sanguineus*: MNRJ 3846(3); MNRJ 11413(2); MNRJ 28081(7); MNRJ 51331(1); MZUSP 38443(2); *Leptopanchax splendens*: MNRJ 8514(30); MNRJ 11302(1); MNRJ 11363(5); MNRJ 18408(2); MNRJ 40461(10); MNRJ 40467(2); *Listrura nematopteryx*: MNRJ 10970(9); MZUSP 36974(1); MZUSP 36975(12); MZUSP 37137(18); MZUSP 37138(16); MZUSP 48106(39); MZUSP 63442(7); MZUSP 63443(8); MZUSP 81082(2); *Microglanis nigripinnis*: MNRJ 1060(1); *Micropogonias furnieri*: MNRJ 40456(2); *Mimagoniates microlepis*: MNRJ 8859(20); MNRJ 17704(1); MNRJ 31241(2); MNRJ 38997(14); *Nannostomus beckfordi*: MNRJ 38998(7); MNRJ 40463(6); MNRJ 51818(1); Não identificada: MNRJ 5921(1); MNRJ 5922(1); MNRJ 8694(1); *Neoplecostomus microps*: MNRJ 17689(4); MNRJ 17700(1); MNRJ 31226(1); MNRJ 41512(1); *Oligosarcus hepsetus*: MNRJ 14957(4); MNRJ 15009(1); MNRJ 41538(2); *Oreochromis niloticus*: MNRJ 51815(1); *Otothyris lophophanes*: MNRJ 17702(11); MNRJ 39007(13); MNRJ 41535(1); *Pareiorhaphis garbei*: MNRJ 17598(6); MNRJ 41511(15); *Parotocinclus maculicauda*: MNRJ 15057(7); MNRJ 17686(2); MNRJ 17691(11); MNRJ 31258(18); MNRJ 39005(6); MNRJ 41523(13); MNRJ 49060(5); *Phalloceros harpagos*: MNRJ 17695(1); MNRJ 40476(1); *Phalloceros leptokeras*: MNRJ 15133(1); MNRJ 31228(38); MNRJ 31232(6); MNRJ 31263(8); MNRJ 31611(24); MNRJ 39009(12); MNRJ 40462(33); MNRJ 41528(6); *Phalloptychus januarius*: MNRJ 40742(6); *Pimelodella lateristriga*: MNRJ 17685(1); MNRJ 38999(3); MNRJ 41525(14); *Poecilia reticulata*: MNRJ 15135(4); MNRJ 31223(2); MNRJ 31229(69); MNRJ 31597(20); MNRJ 31615(2); MNRJ 40452(61); MNRJ 40472(159); MNRJ 40477(66); MNRJ 40740(47); MNRJ 41534(6); MNRJ 49309(15); MNRJ 51814(973); MNRJ 52314(291); *Poecilia vivipara*: MNRJ 31596(2); MNRJ 40451(1); MNRJ 40455(52); MNRJ 40473(1); MNRJ 40475(5); MNRJ 40741(2); MNRJ 51819(25); *Polycentrus schomburgkii*: MNRJ 40457(6); MNRJ 51817(3); *Pseudotothyris janeirensis*: MNRJ 17701(14); *Pyrrhulina filamentosa*: MNRJ 14996(1); MNRJ 14997(1); *Rhamdia quelen*: MNRJ 14854(1); MNRJ 14858(5); MNRJ 31236(1); MNRJ 31261(1); MNRJ 31602(1); MNRJ 31617(1); MNRJ 39000(2); MNRJ 41526(7); MNRJ 49059(2); *Rhamdioglanis transfasciatus*: MNRJ 41515(2); *Rineloricaria nudipectoris*: MNRJ 14992(1); MNRJ 17688(1); MNRJ 31259(17); MNRJ 31606(7); MNRJ 39006(1); MNRJ 41524(6); MNRJ 41540(1); MNRJ 48823(1); *Schizolecis guentheri*: MNRJ 3815(18); MNRJ 31235(1); MNRJ 31607(2); MNRJ 37428(2); MNRJ

40313(2); MNRJ 41510(32); MNRJ 41536(1); *Scleromystax barbatus*: MNRJ 982(4); MNRJ 17696(2); MNRJ 31250(1); MNRJ 31256(2); MNRJ 31604(13); MNRJ 39002(6); MNRJ 41521(12); MNRJ 49057(1); *Spintherobolus broccae*: MNRJ 8796(12); *Synbranchus marmoratus*: MNRJ 11676(2); MNRJ 14955(1); MNRJ 14959(1); MNRJ 17690(1); MNRJ 31230(1); MNRJ 31240(2); MNRJ 31612(1); MNRJ 40460(1); MNRJ 41529(1); *Trichomycterus paquequerense*: MNRJ 14961(12); MNRJ 17687(4); MNRJ 31222(1); MNRJ 31255(56); MNRJ 41514(7); *Trichopodus trichopterus*: MNRJ 39012(2); MNRJ 40469(7); MNRJ 40470(2); MNRJ 51816(9); MNRJ 52316(7).

#### **Microbacias da Baía de Guanabara**

Município de Mesquita:

*Otothyris lophophanes*: MNRJ 1049(4);

#### **Microbacias da Baía de Guanabara**

Município de Nilópolis:

Não identificada: MNRJ 4716(2);

#### **Microbacias da Baía de Guanabara**

Município de Niterói:

*Callichthys callichthys*: MNRJ 19084(9); *Characidium interruptum*: MNRJ 5544(1); *Deuterodon hastatus*: MNRJ 19082(3); *Geophagus brasiliensis*: MNRJ 19083(23); *Hypostomus punctatus*: MNRJ 880(1); MNRJ 19167(8); *Loricariichthys castaneus*: MNRJ 4690(1); Não identificada: MNRJ 4695(1); *Phalloceros leptokeras*: MNRJ 19081(29); *Pimelodella lateristriga*: USNM 41517(1); *Poecilia reticulata*: MNRJ 19080(111); MNRJ 19085(332).

#### **Microbacias da Baía de Guanabara**

Município de Nova Iguaçu:

*Acentronichthys leptos*: DZSJRP 12506(3); MNRJ 9482(7); MNRJ 9483(23); MNRJ 24406(1); MNRJ 43263(1); MNRJ 43273(1); MNRJ 43415(5); MNRJ 45337(11); MNRJ 47033(1); *Ancistrus multispinis*: DZSJRP 12499(19); MCP 44183(2); MNRJ 4991(1); MNRJ 9688(1); MNRJ 24408(17); MNRJ 42381(1); MNRJ 43017(17); MNRJ 43143(10); MNRJ 43153(1); MNRJ 43266(8); MNRJ 43275(1); MNRJ 43281(1); MNRJ 43327(5); MNRJ 43336(11); MNRJ 43408(3); MNRJ 43420(42); MNRJ 43436(6); MNRJ 43787(2); MNRJ 44026(1); MNRJ 47030(7); MNRJ 47036(12); MNRJ 47450(4); *Astyanax keronolepis*: MCP 44195(4); MNRJ 22244(1); MNRJ 24418(43); MNRJ 42567(28); MNRJ 43138(4); MNRJ 43259(3); MNRJ 43302(15); MNRJ 43315(6); MNRJ 43332(30); MNRJ 47782(16); MNRJ 48318(1); MNRJ 48321(12); MNRJ 51717(20); *Astyanax lacustris*: MNRJ 43930(1); MNRJ 43954(19); MNRJ 52340(2); *Australoheros oblongus*: MNRJ 43312(2); MNRJ 43948(14); *Bryconamericus ornaticeps*: DZSJRP 12505(1); MCP 44203(11); MCP 44214(17); MNRJ 10953(1); MNRJ 21039(1); MNRJ 24417(2); MNRJ 43139(164); MNRJ 43260(90); MNRJ 43276(10); MNRJ 43324(151); MNRJ 43404(92); MNRJ 43432(21); MNRJ 43782(3); MNRJ 44023(19); MNRJ 47027(70); *Characidium grajahuense*: DZSJRP 12507(1); MCP 44171(4); MNRJ 8918(13); MNRJ 9800(1); MNRJ 9801(1); MNRJ 21010(1); MNRJ 24414(13); MNRJ 43016(67); MNRJ 43141(34); MNRJ 43152(18); MNRJ 43261(12); MNRJ 43279(9); MNRJ 43325(20); MNRJ 43334(1); MNRJ 43433(4); MNRJ 43783(2); MNRJ 45336(4); MNRJ 47032(9); MNRJ 47447(1); *Characidium interruptum*: MNRJ 9812(1); MNRJ 24413(2); *Cichla kelberi*: MNRJ 47459(2); *Coptodon rendalli*: MNRJ 43314(2); MNRJ 47461(4); *Corydoras nattereri*: MNRJ 24379(24); MNRJ 43418(7); MZUSP 36982(2); MZUSP 42495(5); *Crenicichla lepidota*: MNRJ 43313(2); MNRJ 43340(1); MNRJ 43929(1); MNRJ 43950(4); MNRJ 47456(3); MNRJ 52346(1); *Deuterodon hastatus*: MCP 14558(2); MNRJ 8928(15); MNRJ 19501(2); MNRJ 22245(2); MNRJ 24388(412); MNRJ 42378(12); MNRJ 42379(2); MNRJ 42566(20); MNRJ 42568(3); MNRJ 43015(5); MNRJ 43151(38); MNRJ 43303(34); MNRJ 43333(31); MNRJ 43955(1); MNRJ 51346(6); MNRJ 51347(1); MZUSP 79242(1); *Geophagus brasiliensis*: DZSJRP 12508(1); MNRJ 24382(13); MNRJ 24416(14); MNRJ 43020(17); MNRJ 43272(1); MNRJ 43430(25); MNRJ 47460(8); MNRJ 52347(1); *Gymnotus carapo*: MNRJ 8876(1); MNRJ 24384(1); MNRJ 43427(1); MNRJ 43947(5); MNRJ 47454(1); *Gymnotus pantherinus*: MNRJ 43021(2); MNRJ 43154(1); MNRJ 47037(2); *Hisonotus notatus*: MNRJ 9075(1); MNRJ 43308(5); MNRJ 43957(4); *Homodiaetus passarellii*: MNRJ 43785(1); *Hoplerythrinus unitaeniatus*: MNRJ 50156(1); *Hoplias malabaricus*: MNRJ 24380(3); MNRJ 24402(1); MNRJ 43301(2); MNRJ 43413(1); MNRJ 43951(4); MNRJ 47457(1); *Hoplosternum littorale*: MNRJ 43949(2); *Hyphessobrycon eques*: MNRJ 24386(1); *Hypostomus punctatus*: MNRJ 24378(5); MNRJ 24387(2); MNRJ 24407(2); MNRJ 43341(1); MNRJ 43421(1); MNRJ 43921(2); MNRJ 47451(2); MNRJ 52344(1); *Imparfinis piperatus*: MNRJ 21044(1); *Kronichthys heylandi*: DZSJRP 12498(17); MCP 44182(1); MNRJ 9687(1); MNRJ 42380(1); MNRJ 43145(18); MNRJ 43267(13); MNRJ 43282(1); MNRJ 43409(4); MNRJ 43422(6); MNRJ 43437(1); MNRJ 43788(3); MNRJ 47031(7); MZUSP 42135(6); *Kryptolebias brasiliensis*: MNRJ 11395(3); *Leptopanchax*



*opalescens*: MNRJ 10621(1); MNRJ 10622(1); MNRJ 19485(7); MZUSP 25229(1); MZUSP 25230(1); *Listrura nematopteryx*: MNRJ 9373(2); *Mimagoniates microlepis*: DZSJRP 12504(2); MCP 44173(6); MNRJ 24383(47); MNRJ 24415(18); MNRJ 25744(2); MNRJ 43140(16); MNRJ 43262(43); MNRJ 43405(23); MNRJ 43414(23); MNRJ 43918(4); MNRJ 43956(1); USNM 249889(2); USNM 254256(10); ZUEC 3567(4); *Nannostomus beckfordi*: MNRJ 25739(11); MNRJ 43331(7); MNRJ 43916(13); MNRJ 43952(10); MNRJ 50157(15); MNRJ 43157(1); MNRJ 43960(5); *Parotocinclus maculicauda*: MNRJ 10092(1); MNRJ 10093(1); MNRJ 10094(1); MNRJ 10095(1); MNRJ 10096(1); MNRJ 10097(1); MNRJ 24376(23); MNRJ 24410(19); MNRJ 25776(2); MNRJ 43307(64); MNRJ 43328(1); MNRJ 43337(26); MNRJ 43423(15); MNRJ 43789(1); MNRJ 43922(12); MNRJ 47452(3); MNRJ 52342(8); *Phalloceros harpagos*: MCP 44211(8); *Phalloceros leptokeras*: DZSJRP 12509(5); MNRJ 24381(16); MNRJ 24411(5); MNRJ 42425(6); MNRJ 43147(19); MNRJ 43270(50); MNRJ 43283(26); MNRJ 43310(1); MNRJ 43329(19); MNRJ 43411(19); MNRJ 43428(3); MNRJ 43927(2); MNRJ 45339(62); MNRJ 45341(24); MNRJ 47038(10); MNRJ 47455(4); *Pimelodella lateristriga*: MNRJ 24405(5); MNRJ 43304(1); MNRJ 43919(1); MNRJ 47448(1); MZUSP 37937(5); *Poecilia reticulata*: MNRJ 24385(1); MNRJ 24412(36); MNRJ 43019(49); MNRJ 43156(1); MNRJ 43271(8); MNRJ 43311(2); MNRJ 43330(26); MNRJ 43342(1); MNRJ 43429(18); MNRJ 43928(24); MNRJ 43961(3); MNRJ 52345(1); *Poecilia vivipara*: DZSJRP 12501(11); MNRJ 42424(1); MNRJ 43958(44); *Psalidodon parahybae*: MNRJ 43917(79); *Pseudotothyris janeirensis*: MNRJ 10066(1); MNRJ 24377(3); MZUSP 37938(1); *Pyrrhulina australis*: MNRJ 43953(4); *Pyrrhulina filamentosa*: MNRJ 24419(1); *Rhamdia quelen*: DZSJRP 12510(1); MNRJ 24389(1); MNRJ 43148(1); MNRJ 43305(3); MNRJ 43416(1); MNRJ 43920(1); MNRJ 47449(1); MNRJ 52341(1); *Rhamdioglanis transfasciatus*: MCP 44207(1); MNRJ 43150(1); MNRJ 43277(2); MNRJ 43326(3); MNRJ 43343(2); MNRJ 43434(5); MNRJ 43784(1); MNRJ 44021(1); MNRJ 44024(4); MNRJ 45340(4); MNRJ 47028(7); MNRJ 47034(6); *Rineloricaria nudipectoris*: DZSJRP 12497(9); MNRJ 23846(20); MNRJ 43149(1); MNRJ 43269(5); MNRJ 43309(14); MNRJ 43338(18); MNRJ 43425(49); MNRJ 43426(31); MNRJ 43923(13); MNRJ 43924(7); MNRJ 47453(7); MNRJ 52343(3); *Rineloricaria zawadzki*: MNRJ 23848(46); MNRJ 23849(3); MNRJ 23850(28); *Schizolecis guentheri*: DZSJRP 12500(61); MCP 44189(2); MNRJ 9960(1); MNRJ 9961(1); MNRJ 9962(1); MNRJ 9963(1); MNRJ 9964(1); MNRJ 9965(1); MNRJ 9966(1); MNRJ 9967(1); MNRJ 9968(1); MNRJ 9969(1); MNRJ 9970(1); MNRJ 9971(1); MNRJ 9972(1); MNRJ 9973(1); MNRJ 9974(1); MNRJ 9975(1); MNRJ 9976(1); MNRJ 9977(1); MNRJ 9978(1); MNRJ 9979(1); MNRJ 24409(21); MNRJ 26626(1); MNRJ 43146(3); MNRJ 43268(13); MNRJ 43339(4); MNRJ 43410(6); MNRJ 43424(68); MNRJ 43431(1); MNRJ 43790(1); MNRJ 43925(4); *Scleromystax barbatus*: DZSJRP 12502(2); MCP 44199(1); MNRJ 9689(1); MNRJ 24390(14); MNRJ 24404(13); MNRJ 25000(1); MNRJ 43144(12); MNRJ 43265(8); MNRJ 43335(2); MNRJ 43407(1); MNRJ 43419(101); MNRJ 43786(2); MNRJ 43926(11); MZUSP 42494(7); MZUSP 42496(6); MZUSP 79243(2); ZUEC 4378(1); *Synbranchus marmoratus*: MNRJ 43959(1); MNRJ 47458(4); *Trichomycterus giganteus*: DZSJRP 12503(11); MNRJ 8895(1); MNRJ 9374(16); MNRJ 9375(45); MNRJ 9376(17); MNRJ 44022(2); MNRJ 45309(14); *Trichomycterus nigricans*: MNRJ 24403(19); MNRJ 43018(9); MNRJ 43142(13); MNRJ 43264(6); MNRJ 43274(25); MNRJ 43278(15); MNRJ 43280(1); MNRJ 43306(1); MNRJ 43344(199); MNRJ 43406(1); MNRJ 43417(8); MNRJ 43435(23); MNRJ 43931(1); MNRJ 44025(4); MNRJ 45338(37); MNRJ 47029(23); MNRJ 47035(2); *Xiphophorus helleri*: MNRJ 43155(4).

#### **Microbacias da Baía de Guanabara**

Município de Petrópolis:

*Characidium interruptum*: MNRJ 5441(1); MNRJ 5442(1); MNRJ 5443(1); MNRJ 5444(1); MNRJ 5445(1); MNRJ 5446(1); MNRJ 5447(1); MNRJ 5448(1);

#### **Microbacias da Baía de Guanabara**

Município de Rio Bonito:

*Characidium interruptum*: MNRJ 19281(1); *Corydoras nattereri*: MZUSP 42488(13); *Deuterodon hastatus*: MNRJ 19280(12); *Geophagus brasiliensis*: MNRJ 19284(2); *Hisonotus notatus*: MNRJ 19277(10); *Hypostomus punctatus*: MNRJ 19278(8); *Mimagoniates microlepis*: MNRJ 19283(2); *Otocinclus affinis*: MZUSP 42400(17); *Parotocinclus maculicauda*: MNRJ 19276(4); *Phalloceros leptokeras*: MNRJ 19274(1); *Pimelodella lateristriga*: MNRJ 19282(6); *Poecilia reticulata*: MNRJ 19279(3); *Rhamdia quelen*: MNRJ 19285(1); *Rineloricaria nudipectoris*: MNRJ 19275(3); *Schizolecis guentheri*: MNRJ 27382(6).

#### **Microbacias da Baía de Guanabara**

Município do Rio de Janeiro:

*Australoheros oblongus*: MNRJ 1327(2); MNRJ 1629(1); *Barbulifer enigmaticus*: NPM 65972(2); *Bathygobius soporator*: NPM 66417(52); *Callichthys callichthys*: MNRJ 33058(1); MNRJ 51970(1); *Characidium grajahuense*: MNRJ 3854(1);

MNRJ 3855(1); MNRJ 5828(8); MNRJ 6117(1); USNM 129918(9); *Characidium interruptum*: USNM 129917(2); USNM 289474(2); USNM 289997(1); *Coptodon rendalli*: MNRJ 15012(6); *Corydoras nattereri*: USNM 129927(5); *Cyphocharax gilbert*: MZUSP 1572(2); *Deuterodon janeiroensis*: MNRJ 2570(6); *Deuterodon luetkenii*: USNM 129919(1); *Geophagus brasiliensis*: MNRJ 2955(1); MNRJ 3553(2); MNRJ 8827(1); MNRJ 8828(1); MNRJ 8829(1); MNRJ 8830(1); MNRJ 8831(1); MNRJ 8832(1); MNRJ 8833(1); MNRJ 41850(57); MNRJ 41855(2); *Gobiesox barbatulus*: NPM 61826(24); *Gymnothorax ocellatus*: USNM 83385(1); *Gymnotus pantherinus*: USNM 374465(2); *Hoplias malabaricus*: MNRJ 1125(1); MNRJ 8905(1); *Hyphessobrycon bifasciatus*: MNRJ 2614(24); MNRJ 4993(17); MNRJ 5297(1); MNRJ 6241(30); USNM 129921(1); *Hyphessobrycon flammeus*: USNM 94102(2); USNM 337597(1); *Hypomasticus copelandii*: MNRJ 13403(1); *Hypostomus punctatus*: MNRJ 4992(1); MZUSP 2122(1); *Jenynsia darwini*: USNM 100903(3); *Kryptolebias brasiliensis*: MNRJ 3644(1); USNM 92966(3); USNM 129913(10); *Leptopanchax opalescens*: MNRJ 51918(3); MNRJ 51968(1); MNRJ 51969(8); *Lutjanus jocu*: NPM 66024(1); *Malacoctenus delalandii*: NPM 66836(3); *Microglanis nigripinnis*: USNM 94298(2); USNM 129929(1); *Mimagoniates microlepis*: USNM 94147(3); USNM 129922(1); Não identificada: MNRJ 2546(1); MNRJ 3803(6); MNRJ 3804(87); MNRJ 3810(1); MNRJ 4743(6); MNRJ 6038(1); *Nematolebias whitei*: MZUSP 38352(17); *Oreochromis niloticus*: MNRJ 41851(59); *Otocinclus affinis*: MNRJ 1037(1); USNM 316404(1); *Phalloceros harpagos*: MNRJ 51919(1); USNM 129914(14); *Pimelodella lateristriga*: MNRJ 682(3); USNM 129923(3); USNM 129925(4); *Poecilia reticulata*: MNRJ 3646(1); MNRJ 14553(3); MNRJ 19586(21); MNRJ 20028(4); MNRJ 25826(7); MNRJ 41847(7); MNRJ 41852(15); MNRJ 41856(46); MNRJ 41858(7); MNRJ 51971(3); *Poecilia vivipara*: MNRJ 3634(1); MNRJ 3637(1); MNRJ 3639(1); MNRJ 3641(1); MNRJ 22246(1); MNRJ 41848(167); MNRJ 41853(7); USNM 100904(1); USNM 331903(11); *Pseudocorynopoma doriae*: USNM 129920(6); *Pseudotothyris janeirensis*: USNM 94203(1); *Rhamdia quelen*: MNRJ 813(1); MNRJ 869(1); *Rineloricaria zawadzki*: USNM 129926(18); *Scartella cristata*: NPM 63891(4); *Schizolecis guentheri*: USNM 129928(23); *Scleromystax barbatus*: USNM 94326(1); *Spintherobolus broccae*: USNM 92959(2); *Synbranchus marmoratus*: MNRJ 3568(1); MNRJ 9350(1); MNRJ 9351(1); MNRJ 14796(3); MNRJ 41857(1); MNRJ 50158(1); USNM 129916(1); *Trachelyopterus striatulus*: MNRJ 3221(2); MZUSP 85357(1); *Trichomycterus giganteus*: MNRJ 830(6); *Trichomycterus nigricans*: MZUSP 23156(2); *Xiphophorus helleri*: MNRJ 41849(2); MNRJ 41854(3); MNRJ 41859(25).

#### **Microbacias da Baía de Guanabara**

Município de São Gonçalo:

*Hyphessobrycon bifasciatus*: MNRJ 39379(1); *Poecilia reticulata*: MNRJ 39378(3);

#### **Microbacias da Baía de Guanabara**

Município de Tanguá:

*Corydoras nattereri*: MNRJ 19164(1); *Geophagus brasiliensis*: MNRJ 19163(1); *Hyphessobrycon bifasciatus*: MNRJ 18983(4); MNRJ 19162(96); *Hypostomus punctatus*: MNRJ 19578(1); *Phalloceros harpagos*: MNRJ 19040(19); *Poecilia vivipara*: MNRJ 19041(82); *Synbranchus marmoratus*: MNRJ 48189(1).

#### **Microbacias de Niterói**

Município de Niterói:

*Bathygobius soporator*: ZUEC 8697(2); ZUEC 10919(2); *Callichthys callichthys*: MZUSP 22136(1); *Chaetodon striatus*: NPM 8696(1); *Ctenogobius saepepallens*: ZUEC 8698(1); *Diapterus rhombeus*: MNRJ 25331(1); *Epinephelus niveatus*: ZUEC 8699(1); *Gobionellus oceanicus*: MNRJ 49328(3); *Hypleurochilus fissicornis*: ZUEC 8700(4); ZUEC 10916(18); *Jenynsia darwini*: MNRJ 3645(4); *Labrisomus nuchipinnis*: ZUEC 10918(1); *Mugil curema*: NPM 25329(2); *Mugil rubrioculus*: NPM 25330(1); Não identificada: MNRJ 3801(2); *Parablennius pilicornis*: ZUEC 10917(5); *Phalloceros harpagos*: MNRJ 26157(10); *Phalloptychus januaris*: MNRJ 45179(15); *Poecilia vivipara*: MNRJ 3638(1); MNRJ 3640(4); MNRJ 45180(7); *Ulaema lefroyi*: MZUSP 45408(1); MZUSP 50941(1).

#### **Microbacias de Maricá**

Município de Maricá:

*Atherinella brasiliensis*: MBML 9887(1); MNRJ 19120(8); MNRJ 42269(9); MZUSP 67503(1); *Atlantirivulus maricensis*: MNRJ 11352(1); *Brevoortia pectinata*: MNRJ 13349(4); *Callichthys callichthys*: MBML 9889(25); MBML 9890(27); MBML 9891(11); MBML 9893(8); MBML 9896(9); MBML 9898(24); MBML 9900(1); MBML 9901(2); MBML 9912(4); MNRJ 19118(1); MNRJ 24993(1); MNRJ 43698(1); *Cathorops spixii*: MZUSP 22783(1); *Characidium interruptum*: MNRJ 11435(3); MNRJ 12510(14); MNRJ 12516(1); MNRJ 15031(24); MNRJ 19079(1); MNRJ 19425(16); MNRJ 20597(1); MNRJ 20601(1); MNRJ 22001(6); MNRJ 22002(5); USNM 290005(2); *Coptodon rendalli*: MBML 9885(1); MNRJ 19166(311); *Deuterodon janeiroensis*: MCP 14547(10); MCP 14551(11); MNRJ 11000(115); MNRJ 11001(1); MNRJ

11002(22); MNRJ 11009(13); MNRJ 11566(6); MNRJ 11567(17); MNRJ 12508(1); MNRJ 12509(4); MNRJ 12517(1); MNRJ 19078(4); MNRJ 42571(2); USNM 337602(37); ZUEC 2324(1); ZUEC 4260(1); *Genidens genidens*: MZUSP 22782(6); *Geophagus brasiliensis*: MBML 9886(1); MBML 9905(1); MNRJ 12512(2); MNRJ 16401(2); MNRJ 16402(1); MNRJ 16403(4); MNRJ 16404(1); MNRJ 16405(3); MNRJ 19170(298); MNRJ 49532(5); MZUSP 44895(21); *Gymnotus pantherinus*: MNRJ 46120(2); *Hoplias malabaricus*: MNRJ 19165(2); MNRJ 20892(1); MNRJ 26056(1); *Hoplosternum littorale*: MBML 9892(1); MBML 9895(2); *Hyphessobrycon bifasciatus*: MNRJ 11565(5); MNRJ 19419(357); *Hypostomus affinis*: MNRJ 11568(5); *Hypostomus punctatus*: USNM 235078(1); *Jenynsia lineata*: MBML 9908(6); MBML 9909(7); MNRJ 12254(4); MNRJ 25659(11); MNRJ 25753(7); ZUEC 4703(1); *Leptopanchax citrinipinnis*: MNRJ 11310(3); MNRJ 15400(8); MNRJ 17684(7); MNRJ 19432(22); MZUSP 37197(3); MZUSP 37198(6); MZUSP 37199(1); MZUSP 38435(2); UFRJ 184(2); UFRJ 2202(14); UFRJ 3036(5); UFRJ 3679(3); UFRJ 4396(10); UFRJ 4397(5); UFRJ 4399(6); UFRJ 4400(13); UFRJ 4401(2); UFRJ 4402(10); UFRJ 4403(1); UFRJ 4404(11); UFRJ 4405(5); UFRJ 5187(19); UFRJ 6304(16); UFRJ 6305(4); UMMZ 231543(6); *Mimagoniates microlepis*: MNRJ 12511(1); USNM 35320(1); USNM 249900(33); *Mugil liza*: MNRJ 3169(1); MNRJ 19121(173); MNRJ 44477(1); Não identificada: MBML 9884(1); NPM 9906(4); *Nematolebias papilliferus*: MZUSP 38386(19); MZUSP 38387(1); MZUSP 52964(1); MZUSP 52965(1); MZUSP 52966(4); MZUSP 91513(1); USNM 438375(1); *Notholebias cruzi*: MNRJ 19476(29); *Notholebias fractifasciatus*: MNRJ 11292(2); MZUSP 36423(1); MZUSP 36424(11); MZUSP 38382(6); *Phalloceros harpagos*: MBML 9888(2); MBML 9894(1); MBML 9897(1); MBML 9899(15); MBML 9910(22); MBML 9914(230); MNRJ 12255(4); MNRJ 12514(1); USNM 309784(21); *Phalloptychus januaris*: MBML 9903(390); MBML 9911(1); MNRJ 12253(4); MNRJ 25658(7); *Pimelodella lateristriga*: MNRJ 11743(17); MNRJ 12513(1); MNRJ 13347(1); MNRJ 13348(1); MNRJ 20058(1); *Poecilia reticulata*: MBML 9904(3); MBML 9913(50); MNRJ 19077(46); *Poecilia vivipara*: MBML 9907(13); MNRJ 12252(4); MNRJ 12515(1); MNRJ 19076(4); MNRJ 19117(1); MNRJ 19119(36); MNRJ 25752(3); *Rhamdia quelen*: MNRJ 11759(2); *Synbranchus marmoratus*: MBML 9902(1); MNRJ 12507(1); MNRJ 24994(3); *Ulaema lefroyi*: MNRJ 19126(36).

## **RH-6 Região Hidrográfica Lagos São João**

### **Microbacias de Maricá**

Município de Maricá:

*Awaous tajassica*: MNRJ 40392(1); *Geophagus brasiliensis*: MNRJ 40362(2); MNRJ 40365(12); MNRJ 40391(3); MNRJ 40407(18); *Hoplias malabaricus*: MNRJ 40364(1); MNRJ 40390(1); MNRJ 40408(1); *Kryptolebias brasiliensis*: MNRJ 40394(16); MNRJ 40363(6); MNRJ 40366(8); MNRJ 40393(15); *Poecilia vivipara*: MNRJ 40409(51).

### **Microbacias de Saquarema**

Município de Maricá:

*Australoheros oblongus*: MNRJ 40358(1); *Deuterodon janeiroensis*: MNRJ 40360(2); *Geophagus brasiliensis*: MNRJ 40359(1); *Hoplias malabaricus*: MNRJ 40357(1); *Hyphessobrycon bifasciatus*: MNRJ 40356(15); MNRJ 46431(30); *Hyphessobrycon boulengeri*: MNRJ 46432(1).

### **Microbacias de Saquarema**

Município de Saquarema:

*Achirus declivis*: MNRJ 49648(3); *Atherinella brasiliensis*: MNRJ 40651(1); MNRJ 42110(1); *Australoheros ipatinguensis*: MCP 42366(2); MTD 7221(1); UFRJ 7221(19); UFRJ 7255(1); *Australoheros oblongus*: MNRJ 29979(2); *Awaous tajassica*: MNRJ 46998(1); *Brevoortia pectinata*: MNRJ 42123(3); *Cathorops spixii*: MNRJ 11547(3); *Centropomus undecimalis*: MNRJ 40653(1); MNRJ 40826(1); MNRJ 49007(2); *Characidium interruptum*: MNRJ 11442(2); MNRJ 11443(3); MNRJ 11691(2); MNRJ 15032(12); MNRJ 15034(53); MNRJ 18013(1); MNRJ 29955(2); MNRJ 29958(4); MNRJ 29959(4); MNRJ 29967(1); MNRJ 29969(4); MNRJ 29970(1); MNRJ 29971(1); MNRJ 29980(3); MNRJ 29989(8); MNRJ 29992(5); MNRJ 29997(2); MNRJ 30001(2); MNRJ 30004(6); MNRJ 30007(5); MNRJ 30009(2); MNRJ 30010(1); MNRJ 30012(3); MNRJ 30014(2); MNRJ 30015(1); MNRJ 30017(2); MNRJ 30021(2); MNRJ 30024(2); MNRJ 30025(5); MZUSP 49151(2); MZUSP 49152(8); MZUSP 49156(2); USNM 257492(1); USNM 257497(1); USNM 257507(17); USNM 273330(9); USNM 289977(2); USNM 290008(3); USNM 290181(1); *Ctenogobius shufeldti*: MNRJ 48882(1); *Deuterodon janeiroensis*: MCP 13488(5); MNRJ 11045(5); MNRJ 11061(13); MNRJ 18015(17); MNRJ 29949(7); MNRJ 29950(3); MNRJ 29951(3); MNRJ 29952(4); MNRJ 29953(2); MNRJ 29954(3); MNRJ 29962(5); MNRJ 29963(1); MNRJ 29964(4); MNRJ 29986(3); MNRJ 29987(1); MNRJ 29988(4); MNRJ 29990(5); MNRJ 29994(2); MNRJ 30000(4); MNRJ 30003(10); MNRJ 30005(2); MNRJ 30006(3); MNRJ 30011(4); MNRJ 30016(2); MNRJ 30018(4); MNRJ 30027(4); MNRJ 46991(14); MZUSP 27552(21); MZUSP 27556(239); MZUSP 27566(53); MZUSP 121281(2); USNM 257495(8); USNM 257521(40); *Deuterodon taeniatus*: USNM 342063(1); *Diapterus auratus*: MNRJ 10878(1); *Diapterus rhombeus*: MNRJ 10879(2); *Diplodus*

*argenteus*: NPM 45771(1); *Eleotris pisonis*: MNRJ 49298(16); *Elops saurus*: MNRJ 49442(1); MNRJ 49445(1); *Eucinostomus argenteus*: MNRJ 10872(18); *Eucinostomus gula*: MNRJ 10880(2); *Eugerres brasiliensis*: MNRJ 10877(1); *Genidens genidens*: MNRJ 37451(32); MNRJ 45794(29); *Geophagus brasiliensis*: MNRJ 18014(1); MNRJ 29960(1); MNRJ 29974(3); MNRJ 29978(2); MNRJ 29996(1); MNRJ 40650(22); MNRJ 46994(13); *Gobionellus oceanicus*: MNRJ 50458(1); *Gymnotus pantherinus*: MNRJ 29961(1); MNRJ 29966(1); MNRJ 30002(1); MNRJ 30026(1); MNRJ 46997(3); MZUSP 28767(15); *Hoplias malabaricus*: MNRJ 30028(1); MNRJ 30029(1); MZUSP 27553(1); *Hyphessobrycon bifasciatus*: MNRJ 29975(1); MNRJ 29984(2); *Hyphessobrycon flammeus*: USNM 354713(12); *Hypostomus affinis*: MNRJ 29993(1); MNRJ 30008(1); MNRJ 30013(2); MNRJ 46992(24); MZUSP 21868(2); *Hypostomus punctatus*: MZUSP 121284(2); *Jenynsia lineata*: MNRJ 16835(7); *Kryptolebias gracilis*: MCP 48516(2); MNRJ 29976(2); MNRJ 29985(2); MNRJ 29998(1); *Listrura tetradactyla*: MNRJ 19064(12); MNRJ 31534(17); MNRJ 39068(6); MZUSP 50164(3); MZUSP 52572(1); *Mimagoniates microlepis*: MNRJ 26619(51); MNRJ 29956(8); MNRJ 29968(1); MNRJ 29973(8); MNRJ 29977(20); MNRJ 29999(3); MNRJ 46995(2); MZUSP 26903(50); MZUSP 26904(3); MZUSP 26907(50); MZUSP 118712(1); USNM 249875(2); USNM 249877(50); USNM 249878(51); USNM 249898(6); USNM 257199(1); USNM 331913(2); *Mugil liza*: MNRJ 40652(1); MNRJ 48840(4); Não identificada: MZUSP 27554(1); MZUSP 27557(4); MZUSP 27562(1); *Notholebias fractifasciatus*: USNM 438424(2); *Paralichthys brasiliensis*: MNRJ 48853(1); MNRJ 49446(1); MNRJ 49447(1); *Parotocinclus maculicauda*: MNRJ 21596(6); MNRJ 29957(5); MNRJ 29981(2); MNRJ 30023(4); MNRJ 46993(7); MZUSP 21869(8); MZUSP 121283(4); *Phallocheros harpagos*: MNRJ 46999(1); UNT 6765(6); UNT 6766(3); UNT 6767(10); UNT 6768(10); UNT 6769(8); UNT 6770(6); UNT 6771(5); USNM 257028(33); USNM 257029(15); USNM 257036(200); *Phalloptychus januarius*: USNM 331914(4); *Pimelodella lateristriga*: MNRJ 29965(1); MNRJ 29972(1); MNRJ 29995(2); MNRJ 30019(1); MNRJ 30020(4); MNRJ 30022(3); MNRJ 46996(2); MZUSP 121282(1); *Poecilia reticulata*: MNRJ 47000(3); UNT 6773(23); *Poecilia vivipara*: MNRJ 18017(11); MZUSP 27555(1); USNM 331915(51); USNM 332215(12); *Rhamdia quelen*: MNRJ 29991(1); *Spintherobolus broccae*: MNRJ 10961(17); MNRJ 29982(3); USNM 342062(4); *Stegastes fuscus*: NPM 48855(2); *Stellifer microps*: MNRJ 48846(2); *Strongylura marina*: MNRJ 49443(1); *Strongylura timucu*: MNRJ 49444(1); *Synbranchus marmoratus*: MNRJ 29983(1).

#### **Microbacias da Lagoa de Araruama**

Município de Araruama:

*Atherinella brasiliensis*: MNRJ 8921(1); *Ctenogobius boleosoma*: MNRJ 50480(1); *Nematolebias whitei*: MZUSP 38436(1);

#### **Microbacias da Lagoa de Araruama**

Município de Cabo Frio:

*Archosargus rhomboidalis*: MZUSP 69952(2); MZUSP 69955(2); *Atherinella brasiliensis*: MZUSP 67618(4); *Bathygobius soporator*: MZUSP 66560(3); ZUEC 3720(1); *Ctenogobius boleosoma*: MZUSP 46766(10); MZUSP 66074(5); *Ctenogobius smaragdus*: MZUSP 46835(3); MZUSP 65979(3); MZUSP 46764(4); MZUSP 52039(2); USNM 357714(2); *Eleotris pisonis*: MZUSP 46765(3); MZUSP 64999(2); *Elops saurus*: MZUSP 49069(1); *Eucinostomus argenteus*: MZUSP 41540(1); *Geophagus brasiliensis*: MZUSP 44903(1); *Gobionellus oceanicus*: MZUSP 46762(2); *Gobionellus stomatus*: MZUSP 46836(4); MZUSP 52043(2); USNM 357715(2); *Jenynsia darwini*: MZUSP 63845(6); MZUSP 63850(2); *Jenynsia lineata*: MZUSP 77456(18); *Labrisomus nuchipinnis*: MZUSP 46763(1); *Mugil brevisrostris*: MZUSP 67391(2); *Mugil liza*: MZUSP 116331(1); *Mycteroperca acutirostris*: MZUSP 71037(2); *Mycteroperca microlepis*: MZUSP 70981(1); ZUEC 6311(1); *Phalloptychus januarius*: MZUSP 64154(1); *Poecilia vivipara*: MZUSP 64038(12); MZUSP 64050(1); MZUSP 77465(14); *Scorpaena plumieri*: MZUSP 67284(1); *Serranus baldwini*: MZUSP 71062(1).

#### **Microbacias da Lagoa de Araruama**

Município de Iguaba Grande:

*Jenynsia lineata*: MZUSP 38371(2); *Kryptolebias ocellatus*: MZUSP 38369(1); MZUSP 38441(1); *Nematolebias whitei*: MZUSP 38340(41); MZUSP 38373(33); *Phalloptychus januarius*: MZUSP 38370(2); *Poecilia vivipara*: MZUSP 38372(3).

#### **Microbacias da Lagoa de Araruama**

Município de São Pedro da Aldeia:

*Cynoscion leiarchus*: NPM 122969(1); *Kryptolebias gracilis*: MNRJ 19521(9); MNRJ 19552(9); *Micropogonias furnieri*: NPM 123195(5); NPM 123379(4); *Nematolebias whitei*: MNRJ 11361(7); MNRJ 11398(12); MNRJ 11399(2); MNRJ 19442(41); MZUSP 38338(16); MZUSP 38339(3); MZUSP 38346(7); ZUEC 4878(2); *Phalloptychus januarius*: MNRJ 19506(39); ZUEC 4116(5); *Poecilia vivipara*: MNRJ 19493(7); MZUSP 38388(18).

### **Microbacias da Lagoa de Araruama**

Município de Saquarema:

Não identificada: MZFS 441(1); MZFS 442(1); MZFS 443(1); MZFS 444(1);

### **Bacia do Rio Una e microbacias de Búzios**

Município de Cabo Frio:

*Holacanthus tricolor*: USNM 375554(1); *Hoplerythrinus unitaeniatus*: MNRJ 42268(3); *Nematolebias whitei*: MNRJ 11366(28); *Poecilia vivipara*: MZUSP 46306(9); MZUSP 64057(4); MZUSP 74244(5).

### **Bacia do Rio Una e microbacias de Búzios**

Município de São Pedro da Aldeia:

*Jenynsia lineata*: MNRJ 25674(38); *Nematolebias whitei*: MNRJ 25828(1); *Phalloptychus januarius*: MNRJ 24985(82); *Poecilia vivipara*: MNRJ 24996(47);

### **Bacia do Rio São João**

Município de Araruama:

*Brycon insignis*: MNRJ 11224(1); MNRJ 11228(1); MNRJ 11230(4); *Centropomus parallelus*: MNRJ 13868(12); MNRJ 45502(1); MNRJ 46578(1); *Centropomus undecimalis*: MNRJ 46567(1); *Characidium interruptum*: MNRJ 11433(6); MNRJ 11434(1); MNRJ 11537(1); *Cyphocharax gilbert*: MNRJ 11215(282); *Deuterodon luetkenii*: MNRJ 10526(3); MNRJ 18621(5); *Eigenmannia virescens*: MNRJ 45441(5); *Geophagus brasiliensis*: MNRJ 44727(2); *Glanidium melanopterum*: MNRJ 12137(2); *Hoplias malabaricus*: MNRJ 10522(1); *Hypomasticus copelandii*: MNRJ 10524(1); *Loricariichthys castaneus*: MNRJ 10519(31); MNRJ 21666(3); MNRJ 46472(123); MNRJ 48995(36); Não identificada: MNRJ 10520(1); MNRJ 10521(2); MNRJ 10523(1); MNRJ 10525(9); MNRJ 10528(8); *Pimelodella lateristriga*: MNRJ 11281(59); MNRJ 11282(4); *Platanichthys platana*: MNRJ 13861(225); *Scleromystax barbatus*: MNRJ 10527(2).

### **Bacia do Rio São João**

Município de Cabo Frio:

*Caranx hippos*: NPM 4848(1); MNRJ 50084(1); *Centropomus undecimalis*: MNRJ 50086(2); NPM 4857(1); *Cichla kelberi*: NPM 2754(14); NPM 3693(2); NPM 3694(1); NPM 3703(3); NPM 3704(1); NPM 3719(1); NPM 3720(1); NPM 3721(2); *Clarias gariepinus*: NPM 4841(1); *Deuterodon giton*: NPM 4869(1); *Eigenmannia virescens*: MNRJ 49901(1); *Gymnotus carapo*: NPM 4842(1); *Hyphessobrycon bifasciatus*: NPM 4910(14); *Hypostomus affinis*: MNRJ 48101(1); *Loricariichthys castaneus*: NPM 4839(2); Não identificada: MNRJ 49906(1); *Oreochromis niloticus*: NPM 4916(11); *Poecilia vivipara*: NPM 4913(1); *Trachelyopterus striatulus*: NPM 4840(6).

### **Bacia do Rio São João**

Município de Cachoeiras de Macacu:

*Acentronichthys leptos*: MNRJ 37433(9); MZUSP 93858(2); *Ancistrus multispinis*: MNRJ 37435(1); MZUSP 93952(2); *Characidium alipioi*: MNRJ 37437(1); *Characidium litorale*: MNRJ 37430(1); MNRJ 41264(19); MZUSP 93896(1); MZUSP 93900(1); MZUSP 93909(40); *Crenicichla lacustris*: MZUSP 93926(1); *Deuterodon giton*: MNRJ 37429(99); MZUSP 93975(90); MZUSP 93976(15); *Gymnotus pantherinus*: MNRJ 13765(1); MNRJ 37436(6); *Hisonotus thayeri*: MZUSP 94028(1); *Listrura tetradactyla*: MNRJ 32026(46); MZUSP 93882(15); *Phalloceros leptokeras*: MNRJ 37431(56); *Rhamdioglanis transfasciatus*: MNRJ 13763(2); MNRJ 37432(5); MZUSP 93862(1); *Schizolecis guentheri*: MNRJ 13764(10); MNRJ 37434(8); MZUSP 94016(2); *Trichomycterus nigricans*: MZUSP 93881(1).

### **Bacia do Rio São João**

Município de Casimiro de Abreu:

*Achirus declivis*: NPM 5303(5); *Achirus lineatus*: MNRJ 13939(5); NPM 4918(3); *Albula vulpes*: NPM 5327(3); *Anchoa lyolepis*: MNRJ 13867(5); *Anchoa tricolor*: NPM 5293(2); *Anchoa clupeioides*: NPM 4829(3); NPM 5311(17); *Anchoviella lepidentostole*: MNRJ 13869(50); NPM 5326(5); *Ancistrus multispinis*: MNRJ 48257(1); *Aspistor luniscutis*: NPM 4867(1); *Astronotus ocellatus*: NPM 3729(1); *Astyanax lacustris*: MNRJ 34484(1); MNRJ 37807(5); MNRJ 42990(22); MNRJ 43000(24); NPM 4831(2); NPM 4909(1); *Atherinella brasiliensis*: MNRJ 13919(5); NPM 4875(82); NPM 5288(2); *Awaous tajasica*: MNRJ 13935(5); MNRJ 34500(1); MNRJ 38108(2); MNRJ 39298(1); *Bathygobius soporator*: MNRJ 13936(3); NPM 3050(3); NPM 4914(1); *Brachyhypopomus janeiroensis*: UF 183780(2); *Brevoortia pectinata*: NPM 1794(2); *Brycon insignis*: MNRJ 41408(1); *Bryconamericus tenuis*: MNRJ 34487(4); *Carangoides bartholomaei*: NPM 4847(7); *Caranx latus*: MNRJ 13923(3); NPM 4054(12); NPM 4877(9); *Cathorops spixii*: NPM 4835(3); *Centropomus parallelus*: MNRJ 13922(5); MZUSP 71563(8); NPM 4856(1); *Characidium alipioi*: MNRJ

37467(3); *Characidium litorale*: AMNH 253518(5); INPA 35639(5); MCP 46330(5); MNRJ 34488(1); MNRJ 34489(10); MNRJ 37468(5); MNRJ 37479(5); MNRJ 37489(64); MNRJ 37490(68); MNRJ 37805(2); MNRJ 37822(17); MNRJ 38929(1); MNRJ 39297(23); MNRJ 40704(1); MNRJ 48258(3); MNRJ 50827(3); MNRJ 50828(1); MNRJ 50829(2); MZUSP 109233(5); *Cichla kelberi*: MNRJ 42992(5); NPM 3701(5); NPM 3702(1); NPM 3705(2); NPM 3707(3); NPM 3708(2); NPM 3709(2); NPM 3718(1); NPM 4862(1); *Citharichthys arenaceus*: NPM 4860(2); *Citharichthys spilopterus*: MNRJ 13940(3); *Corydoras nattereri*: MNRJ 34493(5); MNRJ 37470(23); MNRJ 37493(19); MNRJ 37573(3); *Crenicichla lacustris*: MNRJ 37478(1); *Ctenogobius boleosoma*: MNRJ 13937(2); NPM 4851(1); *Ctenogobius shufeldti*: NPM 6323(5); *Deuterodon giton*: MNRJ 34486(13); MNRJ 37488(28); MNRJ 37813(18); MNRJ 37814(1); MNRJ 37815(2); MNRJ 38101(3); MNRJ 38102(3); MNRJ 42999(1); MNRJ 43001(33); MNRJ 51368(1); NPM 4832(3); *Deuterodon heterostomus*: MNRJ 36372(1); *Deuterodon luetkenii*: MNRJ 42998(1); NPM 4911(4); NPM 5302(4); *Deuterodon taeniatus*: MNRJ 34485(8); MNRJ 37466(2); MNRJ 37806(17); MNRJ 37823(34); MNRJ 39296(60); MNRJ 43002(135); NPM 5289(7); *Diapterus rhombeus*: MNRJ 13925(5); NPM 4929(1); *Dormitator maculatus*: MNRJ 13933(1); *Eigenmannia virescens*: MNRJ 34499(3); *Eleotris pisonis*: MNRJ 13934(5); *Elops saurus*: MNRJ 13866(1); NPM 4871(3); NPM 5291(1); *Eucinostomus argenteus*: MNRJ 13926(7); NPM 4864(4); *Eucinostomus melanopterus*: NPM 4863(2); *Eugerres brasiliensis*: NPM 4866(12); *Genidens genidens*: MNRJ 13887(3); NPM 4836(3); *Geophagus brasiliensis*: MNRJ 37477(1); MNRJ 37499(1); MNRJ 37832(1); MNRJ 42993(13); MNRJ 43011(2); NPM 4855(3); *Gobionellus oceanicus*: MNRJ 13938(1); NPM 4852(1); NPM 5286(1); *Gymnotus carapo*: MNRJ 42994(1); MNRJ 43013(1); NPM 4843(1); *Hisonotus thayeri*: MNRJ 34496(29); MNRJ 37474(46); MNRJ 37500(30); MNRJ 37826(5); MNRJ 38103(3); MNRJ 43005(8); *Hoplerethrinus unitaeniatus*: MNRJ 42996(1); *Hoplias malabaricus*: MNRJ 42987(8); *Hoplosternum littorale*: NPM 4837(1); *Hyphessobrycon bifasciatus*: MNRJ 13881(4); MNRJ 42997(3); *Hypomasticus copelandii*: MNRJ 13601(1); MNRJ 31578(1); *Hypostomus affinis*: MNRJ 37810(1); MNRJ 37833(1); MNRJ 38105(1); *Lycengraulis grossidens*: NPM 4830(2); *Metynnis lippincottianus*: NPM 4906(4); *Metynnis maculatus*: MNRJ 42989(13); *Microcambeva barbata*: MNRJ 37572(3); *Microglanis pleriqueater*: MNRJ 34491(1); MNRJ 37471(2); MNRJ 37575(2); *Microphis lineatus*: MNRJ 13920(2); *Mimagoniates microlepis*: MNRJ 37812(2); *Mugil curema*: MNRJ 13928(10); *Mugil liza*: MNRJ 13929(15); *Myrophis punctatus*: NPM 4908(1); *Nannostomus beckfordi*: MNRJ 42991(22); MNRJ 43014(1); *Nematolebias whitei*: MNRJ 13915(6); MZUSP 38341(63); MZUSP 38350(3); MZUSP 38351(12); MZUSP 38413(1); MZUSP 91514(8); ZUEC 2307(1); ZUEC 2308(1); ZUEC 2333(1); ZUEC 2334(1); *Notholebias cruzi*: MNRJ 11289(3); MNRJ 11290(6); MNRJ 11291(2); MNRJ 11379(2); MNRJ 11403(2); MZUSP 36297(1); MZUSP 36298(8); MZUSP 36299(8); *Oligoplites saliens*: NPM 4849(7); NPM 4874(1); MNRJ 13924(1); *Oligosarcus hepsetus*: MNRJ 37808(1); *Ophichthus gomesii*: NPM 4907(1); *Ophthalmolebias constanciae*: MZUSP 36295(8); MZUSP 36300(8); MZUSP 38337(5); MZUSP 38345(13); MZUSP 38425(1); MZUSP 91515(1); ZUEC 2158(1); ZUEC 2159(1); *Otothyris lophophanes*: MNRJ 37819(1); MNRJ 43006(4); *Parotocinclus fluminense*: MNRJ 34497(3); MNRJ 37480(10); MNRJ 37502(3); MNRJ 37817(6); MNRJ 37827(20); MNRJ 38104(3); MNRJ 43007(26); MZUSP 120989(1); MZUSP 120990(3); *Phalloceros harpagos*: MNRJ 37476(2); MNRJ 37498(18); MNRJ 37811(8); MNRJ 37820(4); MNRJ 37831(2); MNRJ 39299(29); MNRJ 43008(2); MNRJ 51789(4); MNRJ 34492(2); MNRJ 37472(6); MNRJ 37492(19); MNRJ 37825(1); MNRJ 43003(7); MNRJ 48254(4); *Poecilia reticulata*: MNRJ 43009(3); MNRJ 51790(1); *Poecilia vivipara*: MNRJ 13917(15); MNRJ 37821(2); MNRJ 38107(4); MNRJ 42995(2); MNRJ 43010(6); NPM 5299(16); *Pomadasys ramosus*: MNRJ 49088(1); *Prionotus punctatus*: NPM 5287(1); *Rhamdia quelen*: MNRJ 37503(1); *Rhamdioglanis transfasciatus*: MNRJ 34490(2); MNRJ 37473(8); MNRJ 37496(15); MNRJ 37824(2); MNRJ 38106(1); MNRJ 43004(3); MNRJ 48255(1); *Rineloricaria nudipectoris*: MNRJ 37475(3); MNRJ 37497(8); MNRJ 37829(2); MNRJ 43012(1); *Saurida brasiliensis*: NPM 1797(2); *Schizolecis guentheri*: MNRJ 34498(1); MNRJ 37481(7); MNRJ 37501(3); MNRJ 37809(10); MNRJ 37818(10); MNRJ 37828(16); MNRJ 48256(1); *Scleromystax barbatus*: MNRJ 34494(3); MNRJ 34495(5); MNRJ 37494(2); MNRJ 37495(3); MNRJ 37574(2); MNRJ 37816(3); MNRJ 37830(2); *Sphoeroides greeleyi*: MNRJ 13942(10); *Sphoeroides testudineus*: NPM 4861(3); *Stellifer brasiliensis*: NPM 4858(3); *Stellifer punctatissimus*: NPM 4917(1); *Strongylura marina*: NPM 4846(4); *Strongylura timucu*: MNRJ 13914(1); *Symphurus plagusia*: MNRJ 13941(1); *Symphurus tessellatus*: NPM 6789(1); *Synbranchus marmoratus*: NPM 5292(1); *Syngnathus folletti*: NPM 4845(1); *Synodus intermedius*: NPM 4032(1); *Trachinotus carolinus*: NPM 4850(1); *Trachinotus falcatus*: NPM 3047(2); NPM 4865(66); *Trichomycterus nigricans*: MNRJ 37469(5); MNRJ 37491(7); NPM 4859(7); *Trinectes paulistanus*: NPM 4919(2); NPM 5319(1); NPM 6790(2); *Ulaema lefroyi*: MNRJ 13927(15).

## **Bacia do Rio São João**

Município de Rio Bonito:

*Astyanax lacustris*: MNRJ 38110(1); *Characidium litorale*: MNRJ 38109(4); *Corydoras nattereri*: MNRJ 38120(2); *Crenicichla lacustris*: MNRJ 38123(1); *Deuterodon janeiroensis*: MNRJ 38111(13); *Eigenmannia virescens*: MNRJ

38121(1); *Hisonotus notatus*: MNRJ 38114(24); *Hoplias malabaricus*: MNRJ 38112(1); *Microglanis pleriqueater*: MNRJ 38119(2); *Otothyris lophophanes*: MNRJ 38115(1); *Parotocinclus fluminense*: MCP 50865(4); MNRJ 38116(7); *Pimelodella lateristriga*: MNRJ 38118(1); *Poecilia vivipara*: MNRJ 38122(1); *Rhamdioglanis transfasciatus*: MNRJ 38117(1); *Rineloricaria nudipectoris*: MNRJ 38113(8); *Scleromystax barbatus*: MNRJ 13899(3).

### **Bacia do Rio São João**

Município de Rio das Ostras:

*Ophthalmolebias constanciae*: MNRJ 19542(5).

### **Bacia do Rio São João**

Município de Sila Jardim:

*Acentronichthys leptos*: DZSJRP 13878(1); MNRJ 13761(2); MNRJ 13888(2); MZUSP 80198(1); *Ancistrus multispinis*: DZSJRP 13842(2); MNRJ 13902(10); MNRJ 19614(1); MNRJ 38099(2); MNRJ 38131(2); MZUSP 80230(1); UFRGS 18869(6); UFRGS 18885(3); *Astyanax lacustris*: DZSJRP 13845(4); DZSJRP 13865(1); MNRJ 13878(3); MNRJ 21007(49); MNRJ 37850(2); MNRJ 38093(1); MNRJ 38139(11); MNRJ 42761(11); MNRJ 42782(3); MNRJ 47088(5); MNRJ 52418(20); NPM 5294(13); UFRGS 18896(4); UFRGS 20037(1); *Atlantirivulus janeiroensis*: MNRJ 13916(4); MZUSP 41383(1); MZUSP 41384(6); *Australoheros oblongus*: DZSJRP 13859(3); DZSJRP 13881(1); DZSJRP 13885(1); MCP 42364(2); MDF 31319(1); MNRJ 13766(1); MNRJ 13930(3); MNRJ 42790(2); NPM 4853(1); NPM 4915(1); NPM 5310(2); NPM 5314(5); UFRGS 18879(3); UFRJ 823(4); UFRJ 1071(1); UFRJ 6115(1); UFRJ 6133(1); UFRJ 7201(3); UFRJ 7202(4); UFRJ 7203(4); UFRJ 7256(1); UFRJ 7270(1); *Awaous tajassica*: MNRJ 47104(6); *Brachyhypopomus janeiroensis*: MBML 2090(1); MNRJ 12127(1); MNRJ 13913(24); MNRJ 19576(1); MNRJ 38135(1); MNRJ 38510(12); MZUSP 43130(1); MZUSP 43131(7); MZUSP 45880(20); MZUSP 80122(2); NRM 22480(2); UFRJ 529(2); UFRJ 598(4); UFRJ 599(2); *Brycon insignis*: MNRJ 10514(1); MZUSP 88515(2); *Bryconamericus tenuis*: DZSJRP 13848(6); DZSJRP 13899(2); MBML 2105(3); MNRJ 12230(1); MNRJ 12231(24); MNRJ 37838(1); MNRJ 38126(3); MNRJ 42763(21); MNRJ 42781(48); MZUSP 80226(1); NPM 5323(8); UFRGS 18873(1); UFRGS 18892(5); *Callichthys callichthys*: MNRJ 13898(1); NPM 5282(1); *Characidium alipioi*: DZSJRP 13850(3); DZSJRP 13869(19); DZSJRP 13887(12); MNRJ 37440(4); MNRJ 39284(2); MNRJ 42780(7); MNRJ 47105(1); MNRJ 48252(12); MZUSP 80224(12); MZUSP 80233(27); MZUSP 80293(16); *Characidium interruptum*: MBML 2096(13); MNRJ 13780(1); MNRJ 13874(6); MNRJ 39256(9); MNRJ 47086(7); MNRJ 52423(1); MZUSP 58992(1); MZUSP 80201(1); MZUSP 80219(2); *Characidium litorale*: DZSJRP 13840(3); MBML 2087(3); MBML 2095(2); MCP 19866(1); MNRJ 13781(2); MNRJ 13782(2); MNRJ 13871(5); MNRJ 13872(5); MNRJ 13873(3); MNRJ 19244(8); MNRJ 19249(23); MNRJ 19264(8); MNRJ 19268(1); MNRJ 37441(10); MNRJ 37836(3); MNRJ 37849(2); MNRJ 38092(3); MNRJ 38124(3); MNRJ 38138(18); MNRJ 38156(4); MNRJ 38931(21); MNRJ 39161(1); MNRJ 39258(4); MNRJ 39283(41); MNRJ 39290(44); MNRJ 40717(4); MNRJ 47087(12); MNRJ 47106(1); MNRJ 48253(10); MNRJ 52429(1); MZUSP 58993(4); MZUSP 80203(1); MZUSP 80228(3); MZUSP 93895(2); MZUSP 93898(4); MZUSP 93901(3); NPM 5300(6); NPM 5320(4); UFRGS 18868(5); UFRGS 18882(14); UFRGS 18891(2); *Cichla kelberi*: NPM 3695(9); NPM 3696(9); NPM 3697(8); NPM 3698(1); NPM 3700(3); NPM 3706(2); *Corydoras nattereri*: DZSJRP 13855(11); MNRJ 13900(6); MNRJ 37858(1); MNRJ 44306(2); MZUSP 80197(1); NPM 5298(2); UFRGS 18889(5); UFRGS 18900(1); USNM 357705(5); *Crenicichla lacustris*: MBML 2099(1); MNRJ 13768(4); MNRJ 13931(3); MNRJ 37847(3); MNRJ 42792(1); MNRJ 47111(3); MNRJ 48043(1); MNRJ 48928(6); MNRJ 48929(1); MNRJ 48930(1); MNRJ 49040(1); MNRJ 49041(1); MNRJ 49042(5); MZUSP 80301(3); MZUSP 80304(3); MZUSP 93921(2); NPM 4854(1); *Crenicichla lepidota*: MNRJ 39803(2); *Cyphocharax gilbert*: MNRJ 13875(5); MNRJ 47085(51); MNRJ 48045(1); MNRJ 52422(3); NPM 4873(1); UFRGS 18875(1); *Deuterodon giton*: DZSJRP 13857(35); DZSJRP 13872(1); DZSJRP 13875(108); DZSJRP 13894(8); MBML 2101(10); MCP 20485(33); MNRJ 10511(3); MNRJ 10513(20); MNRJ 13785(148); MNRJ 13876(15); MNRJ 13877(30); MNRJ 13879(12); MNRJ 19257(254); MNRJ 19266(8); MNRJ 19270(1); MNRJ 37439(6); MNRJ 37851(3); MNRJ 37852(5); MNRJ 38094(21); MNRJ 38125(26); MNRJ 38140(4); MNRJ 38141(21); MNRJ 39082(1); MNRJ 42169(6); MNRJ 42276(2); MNRJ 42764(13); MNRJ 47089(196); MNRJ 47090(12); MNRJ 48044(2); MNRJ 48197(8); MZUSP 80220(6); MZUSP 80232(12); MZUSP 83760(2); MZUSP 93962(43); NPM 5316(10); NPM 5317(3); UFRGS 18867(108); UFRGS 18883(452); UFRGS 18894(216); UFRGS 20035(2); UFRGS 20036(3); UFRGS 20038(13); UFRGS 20039(9); UFRGS 22042(12); UFRGS 25809(3); *Deuterodon heterostomus*: MNRJ 13864(16); MNRJ 19247(3); MNRJ 19251(22); MNRJ 38096(2); MNRJ 51379(5); MZUSP 93978(1); *Deuterodon luethenii*: MCP 20488(2); MNRJ 13882(20); MNRJ 20251(59); *Deuterodon taeniatus*: DZSJRP 13841(1); DZSJRP 13895(15); MBML 2086(14); MBML 2102(30); MCP 44003(5); MNRJ 13786(51); MNRJ 13880(6); MNRJ 19256(113); MNRJ 19260(7); MNRJ 19265(25); MNRJ 37837(3); MNRJ 38095(11); MNRJ 38142(10); MNRJ 38157(53); MNRJ 39282(23); MNRJ 39287(17); MNRJ 39288(23); MNRJ 39289(3); MNRJ 39295(2); MNRJ 42159(4); MNRJ 42762(16); MNRJ 42795(1); MNRJ 51380(10); MNRJ 51720(83); MZUSP 80218(12);



MZUSP 80234(4); MZUSP 80303(91); UFRGS 18870(9); UFRGS 18884(40); UFRGS 18888(18); UFRGS 18895(7); UFRGS 18899(10); UFRGS 22043(1); *Eigenmannia virescens*: DZSJRP 13896(1); MNRJ 10633(1); MNRJ 13777(2); MNRJ 13912(3); MNRJ 38100(1); MNRJ 38134(6); MNRJ 38151(1); MNRJ 47094(2); MNRJ 51783(3); MZUSP 80300(9); MZUSP 93905(1); NPM 4870(2); *Geophagus brasiliensis*: DZSJRP 13863(4); DZSJRP 13866(1); DZSJRP 13882(2); DZSJRP 13900(1); MBML 2084(1); MBML 2100(2); MNRJ 13767(3); MNRJ 13932(5); MNRJ 19248(3); MNRJ 37447(1); MNRJ 37846(1); MNRJ 37859(1); MNRJ 38136(2); MNRJ 38153(3); MNRJ 42774(31); MNRJ 42791(4); MNRJ 47102(24); MNRJ 52427(1); MZUSP 80209(4); MZUSP 93848(1); UFRGS 18880(1); UFRGS 18887(1); *Gymnotus carapo*: DZSJRP 13851(1); DZSJRP 13886(1); MNRJ 13776(2); MNRJ 13911(6); MNRJ 19243(1); MNRJ 37845(6); MNRJ 38152(3); MNRJ 42772(18); MNRJ 42789(1); UFRGS 18881(1); *Gymnotus pantherinus*: MNRJ 47095(9); MZUSP 45881(7); MZUSP 80299(1); NPM 5285(1); *Hisonotus thayeri*: DZSJRP 13836(1); DZSJRP 13852(46); DZSJRP 13874(22); DZSJRP 13889(23); MBML 2089(10); MBML 2104(4); MBML 3669(1); MCP 20823(1); MNRJ 13552(30); MNRJ 13905(30); MNRJ 19253(12); MNRJ 19262(5); MNRJ 19267(5); MNRJ 37448(6); MNRJ 37855(1); MNRJ 38097(2); MNRJ 38129(13); MNRJ 38147(42); MNRJ 42770(10); MNRJ 42787(5); MNRJ 47093(20); MZUSP 58991(12); MZUSP 80288(12); MZUSP 80289(21); MZUSP 80292(67); MZUSP 94027(30); UFRGS 18876(4); *Homodiaetus banguela*: MCP 18736(4); MCP 19619(1); MNRJ 13894(3); MZUSP 80222(1); *Hoplerethrinus unitaeniatus*: MNRJ 13862(3); MNRJ 19263(1); MZUSP 41495(1); NPM 4833(1); *Hoplias malabaricus*: MNRJ 10508(2); MNRJ 13863(1); MNRJ 13870(5); MNRJ 14133(28); MNRJ 37438(1); MNRJ 38143(3); MNRJ 42765(7); MNRJ 47084(6); MNRJ 48563(12); NPM 4834(1); *Hyphessobrycon bifasciatus*: DZSJRP 13856(1); DZSJRP 13876(2); MBML 2103(2); MNRJ 14055(97); MNRJ 47107(1); NPM 5309(17); UFRGS 18898(3); *Hyphessobrycon boulengeri*: DZSJRP 13877(6); MBML 2106(5); MNRJ 13883(2); MNRJ 51381(1); *Hypomasticus copelandii*: MNRJ 12799(8); MNRJ 13778(1); MZUSP 80297(1); *Hypostomus affinis*: DZSJRP 13873(1); MNRJ 13775(7); MNRJ 13903(4); MNRJ 16308(1); MNRJ 19613(2); MNRJ 21664(2); MNRJ 21665(2); MNRJ 21667(2); MNRJ 21670(1); MNRJ 37443(2); MNRJ 37842(1); MNRJ 38127(7); MNRJ 38146(1); MNRJ 38155(1); MNRJ 42778(9); MNRJ 42788(1); MNRJ 47099(2); MNRJ 48312(4); MZUSP 80296(1); MZUSP 80305(6); MZUSP 94030(4); NPM 4838(1); NPM 5281(1); NPM 5284(1); MNRJ 13895(1); MNRJ 15413(4); MZUSP 79810(1); UFRJ 702(3); UFRJ 704(1); *Kronichthys heylandi*: UFRGS 18871(4); *Kryptolebias gracilis*: MNRJ 19475(3); *Loricariichthys castaneus*: MNRJ 13904(9); MNRJ 21668(15); MNRJ 21669(1); MNRJ 21672(15); MNRJ 46473(82); DZSJRP 13861(1); MNRJ 13896(7); MNRJ 47108(3); MNRJ 49371(1); MZUSP 43678(1); MZUSP 43679(1); MZUSP 80225(20); MZUSP 80231(1); MZUSP 83701(31); UFRJ 684(2); *Microglanis pleriqueater*: DZSJRP 13854(1); MBML 2093(1); MNRJ 13551(5); MNRJ 13890(1); MNRJ 13891(6); MNRJ 19290(1); MNRJ 47110(2); MZUSP 80204(3); MZUSP 80206(2); MZUSP 80223(1); MZUSP 80227(3); MZUSP 80229(2); MZUSP 86143(2); MZUSP 93860(2); UFRJ 759(1); UFRJ 3356(6); UFRJ 3404(4); UFRJ 4476(3); UFRJ 8182(1); UFRJ 8183(1); *Mimagoniates microlepis*: DZSJRP 13864(6); DZSJRP 13888(2); MBML 2098(17); MCP 23656(3); MNRJ 13784(9); MNRJ 13884(10); MNRJ 19272(4); MNRJ 37853(5); MNRJ 42776(3); MNRJ 47091(1); MNRJ 52419(65); MNRJ 52420(33); MZUSP 80215(1); MZUSP 80217(9); MZUSP 93865(7); NPM 5301(15); *Mugil curema*: NPM 4844(1); *Mugil liza*: NPM 4912(2); *Nannostomus beckfordi*: MNRJ 52421(5); NPM 4876(30); NPM 5290(10); NPM 5328(12); UFRGS 18897(6); Não identificada: MNRJ 10509(2); MNRJ 10512(18); MNRJ 10515(1); MNRJ 10517(13); MNRJ 10518(1); *Oligosarcus hepsetus*: MNRJ 10510(2); MNRJ 13885(6); MNRJ 42783(2); MNRJ 47092(7); MNRJ 47903(1); MNRJ 52428(1); NPM 4872(2); UFRGS 18901(2); *Ophthalmolebias constanciae*: MZUSP 38365(4); *Otocinclus affinis*: MNRJ 13906(3); *Otothyris lophophanes*: DZSJRP 13847(16); DZSJRP 13871(6); DZSJRP 13884(1); MBML 2094(10); MBML 6301(1); MNRJ 13907(10); MNRJ 19286(1); MNRJ 19287(1); MNRJ 21662(6); MNRJ 21663(16); MNRJ 37442(7); MNRJ 37843(1); MNRJ 37857(9); MNRJ 38128(1); MNRJ 38144(10); MNRJ 42769(21); MZUSP 80199(3); MZUSP 80205(7); MZUSP 80207(1); MZUSP 94013(1); *Pareiorhaphis garbei*: MCP 43598(12); MNRJ 39291(1); *Parotocinclus fluminense*: DZSJRP 13844(30); DZSJRP 13853(76); DZSJRP 13868(12); DZSJRP 13890(19); MCP 20072(3); MNRJ 13773(41); MNRJ 13908(12); MNRJ 19259(28); MNRJ 19271(16); MNRJ 37444(8); MNRJ 37618(1); MNRJ 37844(3); MNRJ 37856(2); MNRJ 38098(3); MNRJ 38130(11); MNRJ 38145(7); MNRJ 42771(39); MNRJ 47112(14); MNRJ 50110(1); MZUSP 80235(36); MZUSP 80236(20); MZUSP 80295(22); MZUSP 94011(24); NPM 5324(1); *Phalloceros harpagos*: DZSJRP 13837(1); DZSJRP 13858(28); DZSJRP 13879(1); DZSJRP 13883(18); DZSJRP 13892(3); MBML 2085(16); MBML 2097(1); MCP 20565(9); MNRJ 13779(1); MNRJ 13918(10); MNRJ 19255(6); MNRJ 19261(2); MNRJ 19273(1); MNRJ 37446(3); MNRJ 38137(56); MNRJ 39286(1); MNRJ 39294(66); MNRJ 42773(90); MNRJ 42793(2); MNRJ 47100(13); MNRJ 52426(14); MZUSP 58990(7); MZUSP 80200(1); MZUSP 80210(10); NPM 5296(3); UFRGS 18874(8); UFRGS 18878(79); UFRGS 18886(11); UFRGS 18890(12); UFRGS 18902(19); *Pimelodella lateristriga*: DZSJRP 13849(2); DZSJRP 13870(2); MBML 2091(1); MCP 19696(4); MNRJ 10516(9); MNRJ 13770(17); MNRJ 13772(1); MNRJ 13892(8); MNRJ 37839(1); MNRJ 38150(2); MNRJ 42779(3); MNRJ 42784(5); MNRJ 47109(2); MNRJ 48042(6); MZUSP 80290(1); MZUSP 80294(8); MZUSP 93913(2); NPM 5322(4); UFRGS 18893(5); NPM 5295(15); *Poecilia vivipara*: MBML 2083(1); MNRJ 42794(2);

MNRJ 47101(2); *Psalidodon parahybae*: MNRJ 19250(28); MNRJ 42796(1); MZUSP 93963(23); NPM 4868(1); NPM 5283(104); NPM 5313(35); *Pseudotothyris janeirensis*: DZSJRP 13846(3); MZUSP 80211(4); MZUSP 80213(2); *Rhamdia quelen*: MBML 2092(1); MNRJ 12408(2); MNRJ 12417(1); MNRJ 13769(2); MNRJ 13893(3); MNRJ 37840(2); MNRJ 42766(3); MNRJ 47098(1); MNRJ 49167(5); NPM 5297(1); NPM 5312(1); NPM 5318(1); NPM 5321(1); *Rhamdioglanis transfasciatus*: DZSJRP 13843(1); DZSJRP 13862(5); DZSJRP 13893(5); MNRJ 13771(3); MNRJ 13889(17); MNRJ 19245(1); MNRJ 19252(1); MNRJ 19258(2); MNRJ 19269(1); MNRJ 37854(1); MNRJ 38149(2); MNRJ 39285(2); MNRJ 39293(2); MNRJ 47097(2); MZUSP 80202(3); MZUSP 80208(13); MZUSP 80214(4); NPM 5315(1); NPM 5325(1); *Rineloricaria nudipectoris*: DZSJRP 13867(3); DZSJRP 13891(2); MCP 20113(2); MNRJ 13774(2); MNRJ 13909(6); MNRJ 21661(1); MNRJ 37445(2); MNRJ 37841(1); MNRJ 38148(5); MNRJ 41039(6); MNRJ 42777(1); MNRJ 52425(1); MZUSP 80291(4); MZUSP 80298(2); MZUSP 93911(1); UFRGS 18877(1); *Schizolecis guentheri*: DZSJRP 13838(1); DZSJRP 13880(1); DZSJRP 13898(14); MBML 2107(2); MCP 20117(3); MNRJ 13910(8); MNRJ 19288(2); MNRJ 38158(1); MNRJ 39292(1); MNRJ 42768(20); MZUSP 94015(1); UFRGS 18872(1); *Scleromystax barbatus*: DZSJRP 13839(1); DZSJRP 13860(1); DZSJRP 13897(1); MBML 2088(2); MCP 20652(1); MNRJ 13901(6); MNRJ 19246(1); MNRJ 38132(4); MNRJ 38133(6); MNRJ 42767(68); MNRJ 42775(3); MNRJ 42785(1); MNRJ 42786(3); MNRJ 47096(5); MNRJ 52424(2); MZUSP 58994(1); MZUSP 80212(1); MZUSP 80221(1); USNM 357704(7); USNM 357706(4); *Spintherobolus broccae*: MNRJ 13886(15); *Synbranchus marmoratus*: MNRJ 13783(1); MNRJ 13921(2); MNRJ 38154(1); MNRJ 47103(3); MZUSP 58989(1); MZUSP 80302(1); *Trachelyopterus striatulus*: MNRJ 13865(1); MNRJ 48494(16); *Trichomycterus nigricans*: MNRJ 13897(1); MNRJ 19254(1); MZUSP 80216(1).

## **RH-7 Região Hidrográfica Rio Dois Rios**

### **Bacia do Rio Paraíba do Sul**

Município de Bom Jardim:

*Astyanax lacustris*: UFRGS 27168(11); *Characidium alipioi*: MNRJ 15118(2); *Deuterodon intermedius*: MNRJ 16720(19); *Geophagus brasiliensis*: MNRJ 14604(13); MNRJ 33521(2); MNRJ 33527(1); *Hyphessobrycon bifasciatus*: MNRJ 16900(3); *Hypomasticus copelandii*: MNRJ 33526(1); *Hypostomus luetkeni*: MNRJ 16246(17); MNRJ 33522(2); *Neoplecostomus microps*: MNRJ 39346(7); *Oligosarcus hepsetus*: MNRJ 33525(4); *Phalloceros harpagos*: MNRJ 16043(50); UFRGS 27175(31); *Psalidodon parahybae*: MNRJ 33520(1); *Rhamdia quelen*: MNRJ 33523(1); MNRJ 33524(2); *Rineloricaria steindachneri*: MNRJ 33528(4); *Trichomycterus goeldii*: MNRJ 39345(3).

### **Bacia do Rio Paraíba do Sul**

Município de Cantagalo:

*Acentronichthys leptos*: MNRJ 20837(1); *Astyanax lacustris*: MNRJ 21894(75); MNRJ 37794(2); *Australoheros ipatinguensis*: MNRJ 14686(4); MNRJ 37780(2); *Characidium alipioi*: MNRJ 15114(12); MNRJ 15116(1); MNRJ 20838(3); MZUSP 109200(2); *Crenicichla lacustris*: MNRJ 20841(1); *Cyphocharax gilbert*: MNRJ 20842(1); MNRJ 37792(2); *Deuterodon giton*: MNRJ 45431(2); *Deuterodon intermedius*: MNRJ 45388(5); *Eigenmannia virescens*: MNRJ 37785(2); MNRJ 45415(1); MNRJ 45419(2); MNRJ 14722(4); MNRJ 14822(6); MNRJ 20836(2); MNRJ 37781(1); MNRJ 46011(1); *Gymnotus carapo*: MNRJ 14681(3); MNRJ 37775(2); MNRJ 45406(1); MNRJ 45429(1); *Hoplias malabaricus*: MNRJ 17151(3); *Hoplosternum littorale*: MNRJ 37778(1); *Hyphessobrycon eques*: MNRJ 45372(2); *Hypostomus luetkeni*: DZSJRP 21123(2); MNRJ 20839(1); *Loricariichthys castaneus*: MNRJ 37776(2); *Neoplecostomus microps*: MNRJ 659(20); MNRJ 15537(14); *Parotocinclus maculicauda*: MNRJ 20833(1); *Phalloceros harpagos*: MNRJ 15971(8); MNRJ 20834(2); *Pimelodus maculatus*: MNRJ 37799(1); *Plagioscion squamosissimus*: MNRJ 37770(1); *Poecilia reticulata*: MNRJ 15948(4); *Psalidodon parahybae*: MNRJ 37783(2); MNRJ 45390(4); *Rhamdia quelen*: MNRJ 12377(8); *Rineloricaria nigricauda*: MNRJ 20840(2); *Trachelyopterus striatulus*: MNRJ 45423(1); *Trichomycterus vitalbrazili*: MNRJ 14348(1); MNRJ 14382(8); MNRJ 17991(1).

### **Bacia do Rio Paraíba do Sul**

Município de Carmo:

*Australoheros ipatinguensis*: MNRJ 14817(2); *Geophagus brasiliensis*: MNRJ 14825(11); MNRJ 40283(1); *Hypostomus luetkeni*: MNRJ 17140(2); *Oligosarcus hepsetus*: MNRJ 17141(1); *Otocinclus affinis*: MNRJ 15302(1); *Otothyris lophophanes*: MNRJ 40281(1); *Phalloceros harpagos*: MNRJ 16473(2); *Poecilia reticulata*: MNRJ 15969(9); MNRJ 40282(2); *Trichomycterus largoperculatus*: MNRJ 14378(8); MNRJ 40279(1); MNRJ 40280(6).

### **Bacia do Rio Paraíba do Sul**

Município de Cordeiro:

*Astyanax lacustris*: MNRJ 33515(1); *Deuterodon giton*: MNRJ 41891(1); *Deuterodon taeniatus*: MNRJ 33514(3); *Glanidium melanopterum*: MNRJ 33518(2); *Hypomasticus copelandii*: MNRJ 33517(1); *Hypostomus luetkeni*: MNRJ 33516(1); *Rineloricaria nigricauda*: MNRJ 33519(2); *Trichomycterus puriventris*: MNRJ 33513(1).

#### **Bacia do Rio Paraíba do Sul**

Município de Duas Barras:

*Phalloceros harpagos*: MNRJ 16013(11); *Trichomycterus largoperculatus*: MNRJ 12810(3); MNRJ 14373(10).

#### **Bacia do Rio Paraíba do Sul**

Município de Itaocara:

*Anchoviella cayennensis*: MNRJ 37790(2); *Astyanax lacustris*: MNRJ 16611(3); MNRJ 17434(8); MNRJ 42343(3); MNRJ 42383(6); *Australoheros ipatinguensis*: MNRJ 13383(1); MNRJ 16254(1); MNRJ 45410(4); *Awaous tajasica*: MNRJ 42393(3); *Brycon opalinus*: MNRJ 14782(1); MNRJ 37796(1); *Bryconamericus tenuis*: MNRJ 45386(12); *Characidium lauroi*: MNRJ 45399(23); MZUSP 109201(5); *Coptodon rendalli*: MNRJ 45379(2); *Corydoras nattereri*: MNRJ 14242(2); *Crenicichla lacustris*: MNRJ 15099(1); MNRJ 42391(3); *Cyphocharax gilbert*: MNRJ 12863(5); MNRJ 12869(1); *Deuterodon giton*: MNRJ 42344(1); MNRJ 42384(44); MNRJ 45387(6); *Deuterodon luetkenii*: MNRJ 45378(6); *Deuterodon taeniatus*: MNRJ 16479(24); MZUSP 109202(1); *Eigenmannia virescens*: MNRJ 14650(3); MNRJ 42395(1); MNRJ 45395(1); *Geophagus brasiliensis*: MNRJ 14698(2); MNRJ 14945(2); MNRJ 16475(8); MNRJ 42350(19); *Glanidium melanopterum*: MNRJ 16061(1); MNRJ 16062(3); *Gymnotus carapo*: MNRJ 45407(1); *Harttia loricariformis*: MNRJ 11778(2); MNRJ 11779(1); *Hisonotus thayeri*: MNRJ 16493(9); *Hoplosternum littorale*: MNRJ 12307(2); *Hyphessobrycon bifasciatus*: MNRJ 14739(7); *Hyphessobrycon eques*: MNRJ 45373(15); *Hypomasticus copelandii*: MNRJ 21383(1); *Hypostomus luetkeni*: DZSRP 21122(3); MNRJ 12423(1); MNRJ 16059(3); MNRJ 16255(1); MNRJ 16265(1); MNRJ 17839(1); MNRJ 38803(3); MNRJ 42347(1); MNRJ 42386(3); MNRJ 42387(4); MNRJ 43908(1); MNRJ 45404(2); MZUSP 45407(1); *Hypostomus vermicularis*: MNRJ 16957(2); *Knodus moenkhausii*: MNRJ 42345(6); *Loricariichthys castaneus*: MNRJ 16028(2); MNRJ 16258(1); MNRJ 37786(1); MNRJ 42388(2); *Megaleporinus conirostris*: MNRJ 14649(1); MNRJ 17099(1); *Mugil liza*: MNRJ 13854(1); MNRJ 14185(1); *Oligosarcus hepsetus*: MNRJ 16474(3); MNRJ 16962(2); MNRJ 16964(1); MNRJ 42346(2); MNRJ 42385(6); *Otothyris lophophanes*: MNRJ 43165(1); MNRJ 43166(1); *Pachyurus adspersus*: MNRJ 37772(1); MNRJ 42392(1); *Pimelodella lateristriga*: MNRJ 16958(1); MNRJ 16961(2); MNRJ 16963(2); MNRJ 37789(3); MNRJ 42394(1); *Pimelodus maculatus*: MNRJ 15955(1); MNRJ 42391(3); MNRJ 42391(3); MNRJ 42391(3); MNRJ 42391(3); *Poecilia reticulata*: MNRJ 42348(12); *Poecilia vivipara*: MNRJ 15946(5); MNRJ 42349(59); *Pogonopoma parahybae*: MNRJ 13562(6); MNRJ 13563(5); MNRJ 19378(3); MNRJ 43159(1); MNRJ 43160(1); MNRJ 43161(1); MNRJ 43162(1); *Prochilodus lineatus*: MNRJ 37797(1); MNRJ 37798(1); *Psalidodon parahybae*: MNRJ 16279(1); MNRJ 16306(4); MNRJ 16598(1); MNRJ 16644(2); MNRJ 19011(1); MNRJ 29082(3); MNRJ 37782(1); MNRJ 37791(1); MNRJ 37793(3); MNRJ 38799(8); *Rhamdia quelen*: MNRJ 42390(1); *Rineloricaria steindachneri*: MNRJ 15582(1); MNRJ 37787(1); MNRJ 37788(1); MZUSP 109203(1); UFRGS 20106(1); UFRGS 20107(1); *Salminus brasiliensis*: MNRJ 37795(1); *Steindachneridion parahybae*: MZUEL 20073(1); *Synbranchus marmoratus*: MNRJ 11750(1); MNRJ 37784(1).

#### **Bacia do Rio Paraíba do Sul**

Município de Nova Friburgo:

*Acentronichthys leptos*: MNRJ 19618(34); MNRJ 48581(1); *Astyanax lacustris*: MNRJ 38717(14); *Bryconamericus tenuis*: MNRJ 48573(25); *Characidium alipioi*: MNRJ 5610(1); MNRJ 5611(1); MNRJ 5612(1); MNRJ 5613(1); MNRJ 5614(1); MNRJ 5615(1); MNRJ 5616(1); MNRJ 11438(2); MNRJ 15124(3); MNRJ 43098(1); *Characidium vidali*: USNM 100908(10); *Deuterodon giton*: MNRJ 11023(1); *Deuterodon intermedius*: MZUSP 1745(27); *Deuterodon janeiroensis*: MNRJ 11004(6); MNRJ 41679(11); *Geophagus brasiliensis*: MNRJ 15490(1); MNRJ 17995(1); MNRJ 48582(1); *Gymnotus pantherinus*: MNRJ 19624(5); *Hemipsilichthys gobio*: MZUSP 47918(1); *Imparfinis minutus*: MNRJ 48577(3); *Neoplecostomus microps*: MNRJ 11304(1); MNRJ 19617(3); MZUSP 2105(1); *Neoplecostomus variipictus*: MNRJ 12806(1); MNRJ 12807(10); MNRJ 12808(5); MNRJ 48575(36); *Pareiorhaphis garbei*: MNRJ 945(6); MZUSP 2108(16); *Phalloceros harpagos*: MNRJ 17790(12); MNRJ 19612(31); MNRJ 48578(32); *Psalidodon parahybae*: MNRJ 11024(28); MZUSP 1782(5); *Rhamdia quelen*: MNRJ 12382(1); MNRJ 15491(2); MNRJ 19625(1); *Rhamdioglanis frenatus*: MNRJ 19605(3); *Schizolecis guentheri*: MNRJ 19611(40); MNRJ 48580(2); *Scleromystax barbatus*: MNRJ 11582(1); MNRJ 19622(25); MNRJ 48574(11); *Trichomycterus goeldii*: MNRJ 48576(24); *Trichomycterus vitalbrazili*: MNRJ 17425(3); MNRJ 17445(2); MNRJ 17822(5); MNRJ 21182(33); MNRJ 48579(1); MZUSP 419(2); USNM 100907(4).

## Bacia do Rio Paraíba do Sul

Município de Santa Maria Madalena:

*Astyanax lacustris*: UFRGS 18919(2); *Australoheros ipatinguensis*: MNRJ 51832(13); *Brycon opalinus*: MNRJ 42415(9); MNRJ 42430(1); MNRJ 42440(1); MNRJ 51827(1); *Callichthys callichthys*: MNRJ 42410(9); MZUSP 100838(1); *Characidium alipioi*: MNRJ 5931(1); MNRJ 42419(1); *Coptodon rendalli*: MZUSP 100836(3); *Deuterodon giton*: MNRJ 4858(17); MNRJ 42402(1); MNRJ 42439(1); *Deuterodon taeniatus*: MNRJ 42414(55); MNRJ 42429(7); MNRJ 42459(65); *Geophagus brasiliensis*: MNRJ 42407(1); MNRJ 42413(16); MNRJ 42418(7); MNRJ 42466(37); MNRJ 51833(66); MZUSP 100839(1); *Harttia loricariformis*: MNRJ 42422(5); MNRJ 42432(2); MNRJ 51829(1); *Hypomasticus mormyrops*: MNRJ 42437(4); MNRJ 51828(1); *Hypostomus affinis*: MNRJ 41413(1); *Hypostomus luetkeni*: MNRJ 42467(2); MZUSP 100833(3); Não identificada: MNRJ 4843(26); *Neoplecostomus microps*: MNRJ 42423(2); MNRJ 42433(1); MNRJ 42468(1); *Oligosarcus hepsetus*: MNRJ 42435(3); MNRJ 51826(5); *Phalloceros harpagos*: MNRJ 8676(9); MNRJ 42405(3); MNRJ 42411(6); MNRJ 42421(2); MNRJ 51831(2); MZUSP 100837(6); *Poecilia reticulata*: MNRJ 42412(10); MNRJ 42417(4); MNRJ 42465(25); MNRJ 51830(6); *Poecilia vivipara*: MNRJ 42406(1); MNRJ 42436(4); UFRGS 18918(10); *Psalidodon parahybae*: MNRJ 42408(22); MNRJ 42434(201); MNRJ 51825(40); *Trichomycterus fuliginosus*: MNRJ 18177(11); MNRJ 42403(2); MNRJ 42404(8); MNRJ 42409(1); MNRJ 42416(11); MNRJ 42420(4); MNRJ 42431(2); MNRJ 42438(6); UFRJ 718(5); UFRJ 3248(5); UFRJ 5207(2); UFRJ 6029(1); *Trichomycterus puriventris*: MNRJ 42464(16); UFRJ 5397(23); UFRJ 5398(28); UFRJ 5495(6); UFRJ 5624(31); UFRJ 5644(1); UFRJ 5677(1); UFRJ 5687(10); UFRJ 6005(1); UFRJ 8432(5).

## Bacia do Rio Paraíba do Sul

Município de São Fidélis:

*Anchoa lyolepis*: MNRJ 45408(1); *Anchoviella cayennensis*: MNRJ 14774(1); MNRJ 17869(15); MZUSP 109205(1); NPM 1883(6); NPM 3265(7); *Anchoviella lepidontostole*: MNRJ 14775(31); MNRJ 16754(20); MNRJ 16868(31); MNRJ 16870(44); MNRJ 16872(30); MNRJ 17460(24); MNRJ 17855(9); MNRJ 17870(2); MNRJ 17871(24); MNRJ 45412(5); MZUSP 11616(78); NPM 3411(3); *Astyanax lacustris*: MNRJ 16271(3); MNRJ 16637(9); MNRJ 16845(2); MNRJ 17435(11); MZUSP 17056(5); MZUSP 17108(14); *Australoheros ipatinguensis*: MZUSP 16163(5); *Awaous tajassica*: MNRJ 14711(2); MNRJ 16466(1); MNRJ 16471(3); MNRJ 16867(2); MNRJ 42473(2); MNRJ 45400(1); MNRJ 45401(3); MZUSP 66623(1); MZUSP 66635(15); *Brachyhypopomus janeiroensis*: MNRJ 13503(1); MNRJ 14634(2); MNRJ 42470(8); MZUSP 23013(1); *Bryconamericus tenuis*: MNRJ 13639(3); MNRJ 13640(3); MNRJ 15177(1); MNRJ 16849(1); MNRJ 16850(11); MNRJ 16865(4); MNRJ 42469(9); MZUSP 17110(10); *Caranx crysos*: MNRJ 45433(1); *Caranx latus*: MNRJ 14776(1); MNRJ 37769(1); *Catathyridium garmani*: MNRJ 45376(1); *Centropomus parallelus*: MNRJ 45393(1); MZUSP 71529(3); *Characidium alipioi*: MNRJ 42443(2); MNRJ 42446(10); *Crenicichla lacustris*: MNRJ 15096(3); MNRJ 15509(1); MNRJ 42471(36); MNRJ 45396(9); MNRJ 45397(1); MZUSP 41206(1); MZUSP 41216(1); *Ctenogobius boleosoma*: MZUSP 65989(3); *Cyphocharax gilbert*: MNRJ 12878(1); MNRJ 45428(1); MZUSP 20848(2); *Deuterodon giton*: MNRJ 14742(21); MNRJ 15178(4); MNRJ 16285(4); MNRJ 16310(13); MNRJ 16673(8); MNRJ 16677(5); MNRJ 16682(24); MNRJ 16683(19); MNRJ 16687(15); MNRJ 16727(16); MNRJ 43883(4); *Deuterodon intermedius*: MNRJ 45389(16); *Deuterodon taeniatus*: MNRJ 16643(46); MNRJ 42444(5); MNRJ 42445(33); MNRJ 42457(21); MNRJ 42572(2); MNRJ 45385(2); MZUSP 26588(5); MZUSP 26589(9); MZUSP 75362(6); *Eigenmannia virescens*: MNRJ 14635(1); MNRJ 14636(5); MNRJ 14637(8); MNRJ 14638(1); MNRJ 14639(9); MNRJ 14640(10); MNRJ 14641(6); MNRJ 14812(9); MNRJ 14813(8); MNRJ 16751(1); MNRJ 45402(6); MZUSP 22972(1); MZUSP 23012(37); *Eleotris pisonis*: MNRJ 45403(1); MZUSP 65000(4); *Eugerres brasiliensis*: MNRJ 17905(1); *Genidens genidens*: MNRJ 45418(1); *Geophagus brasiliensis*: MNRJ 14309(1); MNRJ 14340(15); MNRJ 14709(1); MNRJ 14714(3); MNRJ 14823(4); MNRJ 14836(4); MNRJ 16483(12); MNRJ 42356(3); MNRJ 42450(7); MNRJ 42458(1); MNRJ 42472(15); MNRJ 45413(3); MZUSP 44888(29); MZUSP 44890(5); *Glanidium melanopteron*: MNRJ 15997(1); MNRJ 16020(1); MNRJ 37771(2); MZUSP 42572(3); *Gymnotus carapo*: MNRJ 14820(1); *Harttia loricariformis*: DZSJRP 21103(2); MNRJ 42456(1); *Hemipsilichthys gobio*: MNRJ 42449(1); MNRJ 42455(6); *Hisonotus notatus*: MNRJ 14752(18); MNRJ 15909(5); MNRJ 41329(8); *Hisonotus thayeri*: MNRJ 15913(18); MNRJ 15915(6); MNRJ 15916(9); MNRJ 15936(31); MNRJ 15941(11); MNRJ 15993(5); MNRJ 16056(3); *Hoplias malabaricus*: MNRJ 16877(1); MNRJ 42354(1); MZUSP 23007(1); *Hoplosternum littorale*: MNRJ 45430(1); *Hyphessobrycon bifasciatus*: MNRJ 45381(1); *Hypomasticus copelandii*: MNRJ 16531(2); MNRJ 16536(3); MNRJ 16837(1); MNRJ 16847(2); MNRJ 45427(1); MZUSP 47897(5); MNRJ 17823(1); MNRJ 45384(3); *Hypostomus auroguttatus*: MNRJ 45414(2); *Hypostomus luetkeni*: MNRJ 850(1); MNRJ 12422(1); MNRJ 15999(3); MNRJ 16034(1); MNRJ 16042(2); MNRJ 16873(2); MNRJ 17834(2); MNRJ 17893(1); MNRJ 20022(2); MNRJ 37774(2); MNRJ 41311(1); MNRJ 47638(1); MNRJ 47639(1); MZUSP 22961(46); MZUSP 23008(4); MZUSP 45406(2); MZUSP 66212(1); *Imparfinis*

*minutus*: MNRJ 15978(2); *Knodus moenkhausii*: MNRJ 42474(4); *Loricariichthys castaneus*: MNRJ 14008(1); MNRJ 14010(1); MNRJ 16027(1); MNRJ 26622(2); MNRJ 41319(2); MNRJ 45426(1); *Lycengraulis grossidens*: MNRJ 37777(2); MNRJ 45392(1); MZUSP 11678(1); MZUSP 109204(1); *Megaleporinus conirostris*: MNRJ 8564(1); MNRJ 16532(1); MNRJ 16534(1); MNRJ 16848(2); MNRJ 42478(1); MNRJ 45370(1); MZUSP 47890(1); MZUSP 48040(1); *Metynnis maculatus*: MNRJ 45420(1); *Microglanis parahybae*: MNRJ 11789(16); MNRJ 15958(1); MNRJ 15961(8); MNRJ 15989(7); MNRJ 15992(2); MNRJ 15996(3); MNRJ 16001(1); MNRJ 45382(3); MZUSP 23009(3); *Microphis lineatus*: MNRJ 6380(6); MNRJ 45398(13); *Mugil curema*: MNRJ 13842(1); MNRJ 13843(1); MNRJ 13844(1); MNRJ 13845(3); MNRJ 13847(1); MNRJ 13849(2); MNRJ 13856(1); MNRJ 45417(11); MZUSP 67340(3); MZUSP 67360(2); *Mugil liza*: MNRJ 13848(1); MNRJ 13851(1); MNRJ 13855(1); Não identificada: MNRJ 6382(1); MNRJ 6399(2); MNRJ 6400(6); MNRJ 8500(6); MNRJ 8569(1); MZUSP 22971(1); *Neoplecostomus microps*: MNRJ 42442(9); MNRJ 42448(42); MNRJ 42454(6); *Oligosarcus hepsetus*: MNRJ 16834(1); MNRJ 16836(8); MNRJ 16838(3); MNRJ 16839(2); MNRJ 16840(2); MNRJ 16841(1); MNRJ 16842(1); MNRJ 16843(1); MNRJ 16844(5); MNRJ 16869(2); MNRJ 16878(4); MNRJ 42355(10); MNRJ 42475(1); MNRJ 45383(4); MZUSP 4746(1); MZUSP 4747(1); MZUSP 4748(1); MZUSP 4749(1); MZUSP 4750(1); MZUSP 4751(1); MZUSP 4752(1); MZUSP 4753(1); MZUSP 4754(1); MZUSP 19661(1); *Pachyurus adspersus*: MNRJ 15087(1); MNRJ 45409(1); MZUSP 14374(3); *Piabina argentea*: MZUSP 17054(2); MZUSP 17109(8); *Pimelodella lateristriga*: MNRJ 14765(2); MNRJ 14772(1); MNRJ 14966(1); MNRJ 14970(1); MNRJ 15979(2); MNRJ 16465(6); MNRJ 16472(1); MNRJ 16846(1); MNRJ 16851(1); MNRJ 16852(1); MNRJ 45424(2); MNRJ 45425(1); MZUSP 22962(2); MZUSP 22970(4); MZUSP 23014(20); MNRJ 45432(1); *Poecilia vivipara*: MNRJ 15930(1); MNRJ 15954(1); MNRJ 15965(4); MNRJ 15990(2); MNRJ 42477(1); MNRJ 45380(27); MZUSP 64064(15); *Prochilodus lineatus*: MNRJ 16871(3); MNRJ 45435(2); MNRJ 45439(1); MZUSP 20858(3); *Psalidodon parahybae*: MNRJ 45405(3); *Rhamdia quelen*: MNRJ 12394(1); MNRJ 45374(1); *Rhamdioglanis transfasciatus*: MZUSP 23015(1); *Rineloricaria steindachneri*: DZSJRP 21109(3); MNRJ 14002(1); MNRJ 14003(2); MNRJ 14004(1); MNRJ 14005(2); MNRJ 14006(3); MNRJ 14007(10); MNRJ 14009(1); MNRJ 14011(1); MNRJ 14012(5); MNRJ 14014(15); MNRJ 16259(1); MNRJ 42476(1); MNRJ 45422(4); MZUSP 23010(7); MZUSP 105202(4); *Synbranchus marmoratus*: MNRJ 45499(2); *Trachelyopterus striatulus*: MNRJ 15907(1); MNRJ 16866(1); MZUSP 58748(1); *Trichomycterus puriventris*: MNRJ 42441(15); MNRJ 42447(5); MNRJ 42452(13); MNRJ 42453(2); MNRJ 45375(2); MZUSP 22963(2); MZUSP 23011(3).

## **Bacia do Rio Paraíba do Sul**

Município de São Sebastião do Alto:

*Astyanax lacustris*: MNRJ 16625(3); MZUSP 100852(1); *Awaous tajasica*: MNRJ 16913(1); MZUSP 100849(1); *Bryconamericus tenuis*: MNRJ 13636(3); MNRJ 13638(2); MNRJ 14643(3); MNRJ 16925(1); *Callichthys callichthys*: MNRJ 15512(1); *Crenicichla lacustris*: MNRJ 15094(1); MNRJ 16914(1); MZUSP 100846(1); *Deuterodon giton*: MNRJ 16309(10); MNRJ 16672(3); MNRJ 16676(4); MNRJ 16678(7); MNRJ 16681(2); MNRJ 16711(1); MNRJ 19315(9); *Deuterodon intermedius*: MNRJ 16268(1); MNRJ 16709(82); *Deuterodon taeniatatus*: MNRJ 16718(2); MNRJ 16719(5); MNRJ 16725(8); MNRJ 16731(27); UFRGS 18917(9); *Eigenmannia virescens*: MNRJ 14642(8); MNRJ 14645(1); MNRJ 14646(3); MNRJ 15547(1); *Geophagus brasiliensis*: MNRJ 14323(1); MNRJ 14333(1); MNRJ 14341(7); MNRJ 14603(17); MNRJ 14614(1); MNRJ 14633(8); MNRJ 14842(1); MNRJ 14978(10); MZUSP 100822(1); MZUSP 100850(8); *Glanidium melanopteron*: MNRJ 16912(4); MZUSP 100841(2); MZUSP 100847(2); *Gymnotus carapo*: MNRJ 14644(1); MNRJ 16910(1); *Harttia loricariformis*: MNRJ 11780(16); MNRJ 12148(11); MNRJ 12151(2); MNRJ 13329(1); MNRJ 13376(1); MNRJ 14045(3); MZUSP 100840(1); *Hypomasticus copelandii*: MZUSP 100828(1); MZUSP 104938(1); *Hypomasticus mormyrops*: MNRJ 14671(8); *Hypostomus luetkeni*: MNRJ 14216(5); MNRJ 15514(1); MNRJ 15522(2); MNRJ 15526(1); MNRJ 15531(1); MNRJ 15551(2); MNRJ 16060(1); MNRJ 17458(1); MNRJ 17832(5); MZUSP 100848(2); MZUSP 104936(1); *Imparfinis minutus*: MNRJ 14763(1); *Loricariichthys castaneus*: MNRJ 14039(2); MNRJ 16514(1); *Megaleporinus conirostris*: MNRJ 15535(4); MNRJ 15540(3); MNRJ 15543(3); MNRJ 15546(1); MNRJ 16887(1); *Mugil curema*: MNRJ 13840(1); MNRJ 13841(1); *Neoplecostomus microps*: MNRJ 13555(7); MNRJ 15511(2); MNRJ 15513(2); *Oligosarcus hepsetus*: MNRJ 16886(1); MNRJ 16909(6); MNRJ 16911(1); MNRJ 16924(1); MZUSP 100845(1); *Parotocinclus maculicauda*: MNRJ 15515(3); *Pimelodella lateristriga*: MNRJ 14971(4); MNRJ 15383(4); MNRJ 15516(11); MNRJ 15517(1); MZUSP 100844(3); *Prochilodus lineatus*: MZUSP 104937(2); *Psalidodon parahybae*: MNRJ 16273(1); MNRJ 16301(62); MNRJ 42168(1); MZUSP 100842(1); MZUSP 100851(5); *Rhamdia quelen*: MNRJ 12386(3); MNRJ 12403(2); *Rineloricaria steindachneri*: MNRJ 13992(24); MNRJ 13997(2); MNRJ 13998(1); MNRJ 13999(5); MNRJ 14001(2); MZUSP 100843(1); *Trachelyopterus striatulus*: MNRJ 15518(3); *Trichomycterus puriventris*: MNRJ 14384(46); MNRJ 15542(3); *Xiphophorus helleri*: MNRJ 14325(1).

## Bacia do Rio Paraíba do Sul

Município de Trajano de Moraes:

*Deuterodon intermedius*: MZUSP 100819(1); *Deuterodon taeniatus*: UFRGS 18913(11); *Geophagus brasiliensis*: MZUSP 100835(2); *Glanidium melanopteron*: MZUSP 100832(4); *Harttia loricariformis*: MZUSP 100817(1); MZUSP 100829(5); *Hypostomus luetkeni*: MZUSP 100813(1); MZUSP 100821(10); MZUSP 100826(3); MZUSP 100831(3); UFRGS 18916(1); *Neoplecostomus variipictus*: MZUSP 100818(23); MZUSP 100824(5); *Phalloceros harpagos*: MZUSP 100816(4); MZUSP 100825(11); UFRGS 18915(25); *Pimelodella lateristriga*: MZUSP 100827(3); *Poecilia reticulata*: UFRGS 18914(16); *Rhamdia quelen*: MZUSP 100830(1); *Rineloricaria steindachneri*: MZUSP 100834(1); *Trichomycterus puriventris*: MZUSP 100814(8); MZUSP 100815(2); MZUSP 100823(4); *Xiphophorus helleri*: MZUSP 100820(2).

## RH-8 Região Hidrográfica Macaé e das Ostras

### Microbacias de Rio das Ostras

Município de Casimiro de Abreu:

*Australoheros oblongus*: MCP 42403(2); UFRJ 7593(6).

### Microbacias de Rio das Ostras

Município de Macaé:

*Atherinella brasiliensis*: NPM 41(10); *Bathygobius soporator*: NPM 36(2); *Chilomycterus spinosus*: NPM 4(1); *Citharichthys arenaceus*: NPM 2(1); *Coptodon rendalli*: NPM 43(3); *Deuterodon luetkenii*: NPM 234(6); *Eleotris pisonis*: NPM 492(1); *Genidens genidens*: MNRJ 26057(1); *Lile piquitinga*: NPM 35(3); NPM 428(2); NPM 434(1); NPM 437(1); NPM 439(1); NPM 440(1); NPM 441(1); NPM 442(7); *Mugil liza*: NPM 42(3); *Paralichthys brasiliensis*: NPM 302(1); *Poecilia vivipara*: NPM 46(2); *Polydactylus oligodon*: NPM 5(1); *Sphoeroides testudineus*: NPM 238(2); *Strongylura marina*: NPM 1(1).

### Microbacias de Rio das Ostras

Município de Rio das Ostras:

*Abudefduf saxatilis*: NPM 269(1); *Acanthistius brasiliensis*: NPM 241(1); *Achirus lineatus*: NPM 235(1); *Anchoa marinii*: NPM 444(2); *Anchovia clupeoides*: NPM 64(68); NPM 226(1); NPM 245(1); *Atherinella brasiliensis*: NPM 44(44); NPM 87(59); *Bathygobius soporator*: NPM 3051(1); *Callichthys callichthys*: MNRJ 44331(8); MNRJ 44333(10); MNRJ 44335(9); MNRJ 44337(21); *Caranx latus*: NPM 74(6); NPM 239(1); *Centropomus parallelus*: NPM 63(2); *Centropomus undecimalis*: NPM 225(1); *Ctenogobius boleosoma*: NPM 240(1); NPM 293(7); NPM 527(2); *Diapterus rhombeus*: NPM 244(1); NPM 446(1); *Elops saurus*: NPM 58(1); NPM 59(7); NPM 101(8); *Eugerres brasiliensis*: NPM 3(1); NPM 458(2); *Evorthodus lyricus*: NPM 267(1); *Genidens genidens*: NPM 86(3); *Harengula clupeola*: NPM 268(1); *Hemiramphus brasiliensis*: NPM 445(1); *Hyphessobrycon bifasciatus*: MNRJ 18011(53); *Hyphessobrycon boulengeri*: MNRJ 44330(5); MNRJ 44332(14); MNRJ 44334(7); MNRJ 44336(83); MNRJ 44338(22); *Jenynsia darwini*: NPM 47(28); *Kryptolebias gracilis*: MNRJ 19483(5); MNRJ 19518(3); MNRJ 19548(3); *Lile piquitinga*: NPM 227(13); NPM 251(9); NPM 430(2); NPM 431(1); NPM 432(1); NPM 433(8); NPM 435(3); NPM 436(1); NPM 438(1); *Mugil liza*: NPM 45(4); Não identificada: NPM 1800(2); *Nematolebias whitei*: MNRJ 19468(7); ZUEC 9(1); ZUEC 2078(1); *Oligoplites saurus*: NPM 61(1); NPM 150(1); NPM 456(1); *Ophichthus gomesii*: NPM 261(1); *Ophthalmolebias constanciae*: MNRJ 15596(2); MNRJ 19471(26); MNRJ 19510(10); MNRJ 19511(5); MNRJ 19541(10); USNM 330332(8); ZUEC 2063(1); ZUEC 2064(1); ZUEC 4881(2); *Paralichthys brasiliensis*: NPM 60(1); *Platanichthys platana*: MNRJ 44244(5); *Rhonciscus crocro*: NPM 113(1); *Scartella cristata*: NPM 3046(3); *Sphoeroides testudineus*: NPM 3045(1); *Stellifer brasiliensis*: NPM 459(2); *Strongylura marina*: NPM 62(2); NPM 454(1); *Trinectes microphthalmus*: NPM 453(1); NPM 457(1); *Trinectes paulistanus*: MZUSP 51065(4).

## Bacia do Rio Macaé

Município de Conceição de Macabu:

*Ancistrus multispinis*: MNRJ 31589(1); *Awaous tajasica*: MNRJ 31580(3); *Centropomus parallelus*: MNRJ 31515(1); MNRJ 31579(1); *Characidium interruptum*: MNRJ 39257(7); *Characidium litorale*: MNRJ 38933(5); MNRJ 38934(8); *Crenicichla lacustris*: MNRJ 31588(1); MNRJ 51092(2); *Cyphocharax gilbert*: MNRJ 31566(3); MNRJ 31591(1); MNRJ 31593(1); *Deuterodon giton*: MNRJ 31570(3); *Deuterodon taeniatus*: MCP 17764(11); MNRJ 31327(1); MNRJ 31569(14); MNRJ 31584(2); *Eigenmannia virescens*: MNRJ 31514(1); MNRJ 51089(5); *Geophagus brasiliensis*: MNRJ 31328(1); MNRJ 31577(4); MNRJ 31581(1); MNRJ 51093(57); *Glanidium melanopteron*: MNRJ 31321(2); *Gymnotus carapo*: MNRJ 51090(3); *Hoplerythrinus unitaeniatus*: MNRJ 31519(1); *Hoplias malabaricus*: MNRJ 31325(1); MNRJ 31568(2); MNRJ 31582(1); MNRJ 51086(6); *Hypomasticus copelandii*: MNRJ 31330(2); MNRJ 31331(1); MNRJ 31332(1);

MNRJ 31333(1); MNRJ 31334(1); MNRJ 31335(1); MNRJ 31336(1); MNRJ 31567(4); MNRJ 31513(1); *Hypostomus affinis*: MNRJ 31324(1); MNRJ 31518(1); MNRJ 31575(3); *Mugil curema*: MNRJ 31326(1); MNRJ 31583(1); *Mugil liza*: MNRJ 31516(1); *Oligosarcus hepsetus*: MNRJ 31071(1); MNRJ 31329(2); MNRJ 31572(2); MNRJ 31585(1); MNRJ 51085(9); *Parotocinclus maculicauda*: MNRJ 51087(3); *Phalloceros harpagos*: MNRJ 51091(26); *Pimelodella lateristriga*: MNRJ 31574(5); *Prochilodus lineatus*: MNRJ 31512(1); MNRJ 31590(1); MNRJ 31592(1); *Psalidodon parahybae*: MNRJ 31571(2); MNRJ 31586(6); MNRJ 31587(1); *Rhamdia quelen*: MNRJ 31070(1); MNRJ 31322(1); MNRJ 31323(1); MNRJ 31517(1); MNRJ 51088(1); *Rhamdioglanis transfasciatus*: DZSJRP 13901(1); *Rineloricaria nudipectoris*: MNRJ 28471(1); MNRJ 28472(1); MNRJ 31576(3); *Trachelyopterus striatulus*: MNRJ 31573(8).

### **Bacia do Rio Macaé**

Município de Conceição de Macabu:

*Astyanax lacustris*: MNRJ 51012(7); MZUSP 121352(16); NPM 2496(1); NPM 2497(9); UFRGS 19337(10); *Australoheros oblongus*: MNRJ 51024(1); MNRJ 51025(17); MZUSP 121351(7); NPM 2491(3); NPM 2492(8); NPM 2509(1); UFRGS 19347(2); UFRGS 19352(2); *Awaous tajasica*: MZUSP 121468(1); *Characidium alipioi*: MNRJ 50997(4); NPM 2494(1); *Characidium litorale*: MNRJ 51006(2); MNRJ 51016(3); MZUSP 121471(8); NPM 2493(1); *Characidium vidali*: MNRJ 51011(2); MNRJ 51017(7); NPM 2495(1); *Corydoras nattereri*: MZUSP 121469(1); UFRGS 19339(5); *Crenicichla lacustris*: MNRJ 51023(3); MZUSP 121458(1); *Cyphocharax gilbert*: MNRJ 51018(6); NPM 2511(2); *Deuterodon giton*: MNRJ 50992(52); MNRJ 51033(1); MZUSP 121350(152); MZUSP 121463(63); UFRGS 19336(107); *Deuterodon heterostomus*: MNRJ 51032(1); *Deuterodon luetkenii*: UFRGS 19349(2); *Deuterodon taeniatum*: MNRJ 50993(75); MNRJ 50994(13); MNRJ 51013(172); MNRJ 51034(2); MZUSP 121467(1); UFRGS 19335(73); UFRGS 19340(17); UFRGS 19342(25); UFRGS 19348(6); UFRGS 19350(2); UMZC 329(182); UMZC 6975(1); UMZC 329182(1); *Geophagus brasiliensis*: MNRJ 51005(4); MNRJ 51026(15); MZUSP 121464(1); NPM 2510(9); UFRGS 19346(5); UFRGS 19353(1); *Gymnotus carapo*: MNRJ 51030(1); *Hisonotus thayeri*: MNRJ 51000(38); MZUSP 121470(2); NPM 2513(1); *Hoplerethrinus unitaeniatum*: NPM 2500(2); UFRGS 19351(2); *Hoplias malabaricus*: MNRJ 51020(1); NPM 2499(1); *Hyphessobrycon bifasciatus*: MNRJ 51014(30); MZUSP 121349(56); *Hypomasticus copelandii*: MZUSP 121459(1); *Hypostomus affinis*: MNRJ 50999(4); MNRJ 51028(1); NPM 2505(2); *Microcambeva barbata*: MNRJ 50998(4); *Microglanis pleriqueater*: MNRJ 51009(1); *Mimagoniates microlepis*: MNRJ 50996(18); *Oligosarcus hepsetus*: MNRJ 50995(1); MNRJ 51015(1); NPM 2498(3); UFRGS 19338(3); *Parotocinclus maculicauda*: MNRJ 51001(14); MNRJ 51019(27); MZUSP 121466(2); NPM 2512(1); *Phalloceros harpagos*: MNRJ 51004(24); MNRJ 51021(37); NPM 2508(2); *Pimelodella lateristriga*: MNRJ 51003(10); MNRJ 51029(1); MZUSP 121461(9); NPM 2501(1); NPM 2502(3); *Poecilia vivipara*: MNRJ 51010(1); MNRJ 51022(17); NPM 2506(8); NPM 2507(5); *Rhamdia quelen*: MZUSP 121462(1); *Rhamdioglanis transfasciatus*: MNRJ 51008(4); MZUSP 121465(1); NPM 2504(1); *Rineloricaria nudipectoris*: MNRJ 51002(4); MZUSP 121460(2); NPM 2503(1); *Scleromystax prionotos*: MNRJ 51007(2); MNRJ 51027(1); NPM 2330(5); *Synbranchus marmoratus*: MNRJ 51031(1).

### **Bacia do Rio Macaé**

Município de Macaé:

*Acentronichthys leptos*: MNRJ 10963(1); *Achirus lineatus*: NPM 1917(1); NPM 2056(1); *Anchoa lyolepis*: NPM 1947(3); *Anchoa tricolor*: NPM 1931(20); NPM 4029(7); *Anchovia clupeioides*: NPM 358(2); NPM 1789(533); NPM 1919(600); NPM 2273(1); *Anchoviella lepidentostole*: NPM 1962(1); *Ancistrus multispinis*: MNRJ 11223(1); MNRJ 39315(3); *Astyanax lacustris*: MNRJ 47267(11); MNRJ 50769(16); MNRJ 50786(3); MNRJ 51094(2); MNRJ 51122(4); MZUSP 84732(5); MZUSP 121306(4); NPM 337(1); NPM 1974(10); NPM 2137(3); NPM 2138(20); *Atherinella brasiliensis*: NPM 2044(4); *Australoheros oblongus*: MCP 20195(1); MCP 54081(3); MNRJ 47279(4); MNRJ 50778(2); MNRJ 51111(1); MTD 31320(3); UFRJ 7568(8); UFRJ 7569(4); UFRJ 7573(1); *Awaous tajasica*: MNRJ 39310(1); MNRJ 46966(1); MNRJ 50780(5); MNRJ 50791(8); MNRJ 50805(2); MNRJ 51114(16); MNRJ 51136(30); NPM 311(2); NPM 350(1); NPM 1933(5); NPM 1934(4); NPM 2211(1); NPM 2212(1); NPM 2213(2); NPM 2214(1); *Bathygobius soporator*: NPM 1900(1); NPM 1912(1); NPM 1913(2); NPM 2158(4); *Brachyhypopomus janeiroensis*: NPM 263(1); NPM 1846(2); NPM 2039(1); NPM 2224(1); NPM 2225(2); *Brycon insignis*: MNRJ 5633(2); MNRJ 8712(5); *Bryconamericus tenuis*: NPM 1899(5); *Callichthys callichthys*: MNRJ 38915(1); *Caranx latus*: NPM 1961(2); NPM 2171(5); NPM 2173(3); NPM 2174(10); *Catathyrion garmani*: NPM 264(1); NPM 2074(2); *Cathorops spixii*: NPM 355(1); *Centropomus parallelus*: NPM 1915(2); NPM 2242(1); NPM 2243(2); NPM 2244(1); NPM 2245(1); NPM 2246(1); NPM 2247(1); NPM 2248(1); NPM 2249(1); NPM 2250(1); NPM 2251(2); *Cetengraulis edentulus*: NPM 1918(2); NPM 4028(9); *Characidium alipioi*: MNRJ 39301(12); UFRGS 19611(1); *Characidium interruptum*: MNRJ 47266(19); MNRJ 50772(5); *Characidium litorale*: MCP 19867(1); MNRJ 30881(7); MNRJ 38932(3); MNRJ 38937(1); MNRJ 39202(3); MNRJ 39203(1); MNRJ 39204(3); MNRJ 39302(14); MNRJ 39320(1); MNRJ 39321(15); MNRJ 39330(20); MNRJ 50812(11); MNRJ 51142(16); MNRJ



51149(3); MNRJ 51156(19); MNRJ 51164(20); MNRJ 51189(2); MNRJ 51285(1); MZUSP 121308(2); UFRGS 19343(2); *Characidium vidali*: MNRJ 30871(2); MNRJ 30872(2); MNRJ 30873(1); MNRJ 30874(2); MNRJ 30875(1); MNRJ 30876(5); MNRJ 30877(1); MNRJ 30878(1); MNRJ 30879(2); MNRJ 30880(2); MNRJ 30889(5); MNRJ 39159(1); MNRJ 39205(3); MNRJ 39314(54); MNRJ 39326(9); MNRJ 39327(20); MNRJ 50811(13); MNRJ 51141(23); MNRJ 51148(7); MNRJ 51155(18); MNRJ 51163(19); MNRJ 51173(2); *Chilomycterus spinosus*: NPM 1970(37); NPM 2180(3); NPM 2182(5); *Chloroscombrus chrysurus*: NPM 1944(2); NPM 1984(1); *Citharichthys arenaceus*: NPM 361(1); NPM 1903(12); NPM 2160(1); NPM 2161(15); NPM 2162(4); NPM 2163(1); NPM 2164(23); *Citharichthys macrops*: NPM 1949(4); *Clarias gariepinus*: NPM 342(2); NPM 352(1); NPM 1575(1); NPM 2290(1); NPM 2291(3); NPM 2292(1); *Conodon nobilis*: NPM 363(1); *Corydoras nattereri*: MZUSP 27560(1); *Crenicichla lacustris*: MCP 20191(7); MNRJ 8757(1); MNRJ 39311(1); MNRJ 47281(5); MNRJ 50777(6); MNRJ 50789(10); MNRJ 50803(2); MNRJ 51110(4); MNRJ 51134(13); NPM 313(1); NPM 1955(2); NPM 1988(1); NPM 2219(2); NPM 2220(2); NPM 2221(1); NPM 2226(1); NPM 2265(1); NPM 2284(1); *Ctenogobius shufeldti*: NPM 335(1); NPM 2217(1); *Cyphocharax gilbert*: DZSJRP 13074(1); MNRJ 8763(1); MNRJ 8764(1); MNRJ 47265(11); MNRJ 50771(2); MZUSP 121311(11); NPM 1956(4); NPM 2268(3); NPM 2269(2); NPM 2271(3); *Dactylopterus volitans*: NPM 1930(1); *Deuterodon giton*: DZSJRP 13072(19); MCP 20480(4); MNRJ 39319(1); MNRJ 46829(2); MNRJ 46948(5); MNRJ 46957(5); MNRJ 46963(4); MNRJ 47268(30); MNRJ 47270(40); MNRJ 50768(22); MNRJ 51119(2); MNRJ 51123(1); MZUSP 27564(34); MZUSP 121313(80); NPM 2050(6); NPM 2055(1); NPM 2169(1); USNM 257509(12); *Deuterodon luetkenii*: MCP 25839(2); MZUSP 27563(4); NPM 2061(1); NPM 2277(2); NPM 2278(1); NPM 2279(1); *Deuterodon taeniatus*: DZSJRP 13064(3); MCP 20474(3); MNRJ 11026(8); MNRJ 11027(10); MNRJ 11028(4); MNRJ 11030(1); MNRJ 11031(19); MNRJ 11032(7); MNRJ 11033(3); MNRJ 11034(4); MNRJ 11577(29); MNRJ 39300(22); MNRJ 39313(10); MNRJ 39318(1); MNRJ 44224(78); MNRJ 47269(266); MNRJ 50770(664); MNRJ 50787(10); MNRJ 50801(17); MNRJ 51095(7); MNRJ 51096(163); MNRJ 51121(2); MNRJ 51183(12); MZUSP 27565(28); UFRGS 19341(111); *Dormitator maculatus*: NPM 2086(3); *Eigenmannia virescens*: MNRJ 46832(1); MNRJ 50776(1); MNRJ 50797(1); MNRJ 51106(3); MNRJ 51130(2); *Eleotris pisonis*: MNRJ 50782(3); MNRJ 50792(11); MNRJ 51115(1); MNRJ 51137(4); NPM 1916(1); NPM 2286(3); NPM 2287(2); *Engraulis anchoita*: NPM 2049(1); NPM 2166(1); *Eucinostomus melanopterus*: NPM 2046(3); *Eugerres brasiliensis*: NPM 2076(1); *Evorthodus lyricus*: NPM 347(1); *Genidens genidens*: NPM 341(85); NPM 366(132); NPM 1793(1); NPM 2083(1); NPM 2300(26); NPM 2305(23); NPM 2306(10); NPM 2307(2); *Genidens machadoi*: NPM 2270(3); *Geophagus brasiliensis*: MCP 20184(1); MNRJ 8755(3); MNRJ 8756(2); MNRJ 15166(1); MNRJ 46833(1); MNRJ 46969(1); MNRJ 47280(7); MNRJ 50779(1); MNRJ 50790(1); MNRJ 50804(11); MNRJ 51112(6); MNRJ 51135(4); MNRJ 51147(2); MNRJ 51172(1); MNRJ 51182(5); MZUSP 121307(4); NPM 333(1); NPM 344(2); NPM 2065(2); NPM 2184(3); NPM 2185(2); NPM 2201(14); *Glanidium melanopteron*: MNRJ 8743(1); *Gobionellus oceanicus*: NPM 1925(3); *Gymnotus carapo*: MNRJ 50793(1); MNRJ 51107(8); *Gymnotus pantherinus*: MCP 20666(6); MNRJ 18008(1); MNRJ 46831(1); MNRJ 47278(1); MNRJ 51160(2); MNRJ 51170(5); MNRJ 51180(6); *Harengula clupeola*: NPM 1953(2); NPM 2146(25); *Hisonotus thayeri*: MCP 20109(1); MCP 35692(6); MNRJ 30884(7); MNRJ 39303(13); MNRJ 50795(4); MNRJ 51101(1); MNRJ 51125(19); *Hoplias malabaricus*: MNRJ 8737(1); MNRJ 46959(1); MNRJ 50773(2); MNRJ 51099(1); MNRJ 51120(1); NPM 2094(1); NPM 2299(2); *Hyphessobrycon bifasciatus*: DZSJRP 13073(30); MNRJ 47271(5); MZUSP 121309(2); NPM 334(31); *Hyphessobrycon boulengeri*: NPM 336(9); *Hypomasticus copelandii*: NPM 2043(1); NPM 2143(3); NPM 2144(2); *Hypostomus affinis*: MNRJ 748(1); MNRJ 914(1); MNRJ 8736(2); MNRJ 39308(1); MNRJ 46951(1); MNRJ 46960(1); MNRJ 46961(1); MNRJ 46964(2); MNRJ 47277(8); MNRJ 51100(2); MNRJ 51140(9); MNRJ 51144(3); MZUSP 121312(2); NPM 349(1); NPM 1907(2); NPM 1908(1); NPM 1987(1); NPM 2032(2); NPM 2078(5); NPM 2151(6); UFRGS 19345(1); *Lagocephalus lagocephalus*: NPM 1969(4); NPM 2228(2); NPM 2266(1); *Larimus breviceps*: NPM 362(5); *Loricariichthys castaneus*: MNRJ 720(1); *Lycengraulis grossidens*: NPM 1921(18); NPM 4030(1); *Microglanis pleriqueater*: DZSJRP 13066(1); MNRJ 30887(2); MNRJ 30888(1); MNRJ 39309(3); MNRJ 50800(1); MNRJ 51117(1); *Microphis lineatus*: MNRJ 50784(3); MNRJ 51118(1); MNRJ 51138(3); NPM 339(4); NPM 348(1); NPM 1924(1); NPM 1928(1); NPM 1966(1); NPM 2218(1); *Micropogonias furnieri*: NPM 2256(1); NPM 2258(8); NPM 2259(11); *Mimagoniates microlepis*: MNRJ 47272(6); MNRJ 51098(2); USNM 249884(4); *Mugil curema*: NPM 354(7); NPM 473(3); NPM 2070(1); NPM 2175(94); NPM 2178(1); *Mugil liza*: NPM 346(15); NPM 357(1); Não identificada: MNRJ 4904(1); MNRJ 8709(1); MZUSP 27561(3); *Neoplecostomus microps*: MCP 20059(1); MCP 20065(5); MCP 20070(4); MCP 20080(1); MCP 46509(1); MNRJ 39322(14); MNRJ 39328(1); MNRJ 50814(8); MNRJ 51145(7); MNRJ 51151(4); MNRJ 51158(27); MNRJ 51166(9); MNRJ 51186(23); *Odontoscion dentex*: NPM 2051(1); *Oligoplites saliens*: NPM 1890(2); NPM 2154(2); *Oligosarcus hepsetus*: DZSJRP 13071(2); MNRJ 46949(1); MNRJ 46958(2); MNRJ 47273(2); MNRJ 50794(1); MNRJ 50806(1); MNRJ 51097(1); MNRJ 51124(3); MNRJ 51174(2); NPM 351(1); NPM 2048(4); NPM 2189(1); NPM 2190(1); NPM 2191(2); NPM 2192(1); NPM 2193(1); *Oreochromis niloticus*: MNRJ 51113(1); NPM 2085(1); NPM 2252(1); NPM 2253(1); NPM 2254(3); NPM



2255(2); *Otocinclus affinis*: MNRJ 11220(1); *Otothyris lophophanes*: DZSJRP 13069(49); MNRJ 11221(20); *Paralichthys brasiliensis*: NPM 1973(4); *Pareiorhaphis garbei*: MNRJ 50813(7); MNRJ 51152(6); MNRJ 51161(1); MNRJ 51167(1); MZUSP 1163(1); MZUSP 47060(1); *Parotocinclus maculicauda*: MCP 20077(11); MCP 35691(4); MNRJ 30882(5); MNRJ 30883(4); MNRJ 39304(27); MNRJ 50783(13); MNRJ 50788(11); MNRJ 50808(4); MNRJ 51102(9); MNRJ 51126(8); UFRGS 19344(1); *Pellona harroweri*: NPM 1889(85); NPM 4033(1); *Phalloceros harpagos*: DZSJRP 13070(2); MCP 20564(2); MCP 20566(7); MNRJ 39312(29); MNRJ 39317(1); MNRJ 39325(2); MNRJ 46967(5); MNRJ 47283(2); MNRJ 50774(11); MNRJ 50802(30); MNRJ 50815(50); MNRJ 51108(20); MNRJ 51131(23); MNRJ 51154(3); MNRJ 51162(38); MNRJ 51171(270); MNRJ 51181(1); MNRJ 51188(83); NPM 2088(3); *Pimelodella lateristriga*: DZSJRP 13068(4); MNRJ 47275(13); MNRJ 50785(2); MNRJ 50796(1); MNRJ 51104(9); MNRJ 51129(3); MNRJ 51177(4); MZUSP 121310(1); NPM 312(13); NPM 340(18); NPM 353(48); NPM 2075(15); NPM 2202(1); NPM 2203(1); NPM 2204(1); NPM 2205(1); NPM 2206(2); NPM 2207(1); *Poecilia vivipara*: MNRJ 46968(2); MNRJ 47282(6); MNRJ 50775(18); MNRJ 50798(1); MNRJ 51109(8); MNRJ 51132(43); NPM 338(15); NPM 345(13); NPM 1978(5); NPM 1979(4); NPM 1985(12); NPM 2272(6); NPM 2288(2); NPM 2289(10); *Polydactylus virginicus*: NPM 1902(4); NPM 2140(1); NPM 2141(1); *Pomadasys ramosus*: NPM 2058(2); *Porichthys porosissimus*: NPM 2264(1); *Prochilodus lineatus*: MNRJ 8714(3); *Prochilodus vimboides*: NPM 1983(4); NPM 2236(2); NPM 2237(2); NPM 2238(3); *Pseudophallus mindii*: MNRJ 50799(2); MNRJ 51139(2); NPM 2089(1); *Pseudotothyris janeirensis*: MNRJ 10941(4); MNRJ 11222(25); *Pyrrhulina australis*: MNRJ 50781(2); *Rhamdia quelen*: DZSJRP 13065(1); MNRJ 8761(1); MNRJ 46962(1); MNRJ 46965(1); MNRJ 51105(1); MNRJ 51128(1); MNRJ 51178(3); MZUSP 733(2); MZUSP 27558(1); NPM 1989(1); NPM 2230(1); NPM 2231(1); NPM 2232(1); NPM 2233(1); *Rhamdioglanis transfasciatus*: DZSJRP 13067(1); MNRJ 39316(1); MNRJ 39324(4); MNRJ 47274(3); MNRJ 50816(2); MNRJ 51153(7); MNRJ 51159(20); MNRJ 51169(11); MNRJ 51179(2); MNRJ 51185(3); *Rineloricaria nudipectoris*: MCP 20144(1); MNRJ 39307(1); MNRJ 46830(1); MNRJ 46950(1); MNRJ 50807(1); MNRJ 50810(2); MNRJ 51116(1); MNRJ 51168(20); MNRJ 51175(1); *Schizolecis guentheri*: MCP 20079(4); MCP 20085(57); MCP 20095(45); MCP 35690(4); MNRJ 30885(5); MNRJ 30886(1); MNRJ 39305(6); MNRJ 39323(18); MNRJ 51146(12); MNRJ 51176(2); MNRJ 51187(45); NPM 1909(2); NPM 2156(3); NPM 2157(1); *Scleromystax barbatus*: MNRJ 39306(1); *Scleromystax prionotos*: MZUSP 27559(2); *Selene vomer*: NPM 1946(1); NPM 1968(3); NPM 2187(1); *Sphoeroides spengleri*: NPM 2045(2); *Sphoeroides testudineus*: NPM 1971(4); NPM 2168(2); *Spintherobolus broccae*: MNRJ 10960(17); *Stellifer punctatissimus*: NPM 365(4); *Stellifer rastrifer*: NPM 356(1); NPM 2064(1); NPM 2261(2); *Strongylura marina*: NPM 2073(2); *Symphurus tessellatus*: NPM 1904(47); NPM 1938(2); NPM 1943(52); *Synbranchus marmoratus*: MNRJ 50809(3); MNRJ 51133(1); *Syngnathus folletti*: NPM 1929(1); NPM 2093(1); *Trachelyopterus striatulus*: MNRJ 1014(1); MNRJ 46952(2); MNRJ 47276(2); MNRJ 51103(1); MNRJ 51127(1); NPM 2071(2); NPM 2183(6); *Trachinotus carolinus*: NPM 2281(1); *Trichiurus lepturus*: NPM 2294(1); NPM 2298(5); *Trichomycterus caipora*: MNRJ 39329(1); MNRJ 51143(1); MNRJ 51150(12); MNRJ 51157(35); MNRJ 51165(22); MNRJ 51184(7); MZUSP 1996(18); *Trinectes microphthalmus*: NPM 2066(1); *Trinectes paulistanus*: NPM 265(5); NPM 343(8); NPM 360(5); NPM 1937(10); NPM 1941(4); NPM 2148(14); NPM 2150(3); NPM 2234(1); *Umbrina canosai*: NPM 359(1); *Umbrina coroides*: NPM 364(2).

## **Bacia do Rio Macaé**

Município de Nova Friburgo:

*Acentronichthys leptos*: MCP 18002(2); MNRJ 51079(2); *Bryconamericus tenuis*: MNRJ 48584(149); MNRJ 50737(54); MNRJ 51039(71); MNRJ 51045(8); *Characidium interruptum*: MNRJ 11437(7); *Characidium vidali*: MCP 17738(1); MCP 17898(1); MNRJ 41265(5); MNRJ 50742(10); MNRJ 50748(32); MNRJ 50749(1); MNRJ 50762(13); MNRJ 51049(8); MNRJ 51050(23); MNRJ 51059(33); MNRJ 51068(3); MNRJ 51071(9); *Deuterodon taeniatus*: MNRJ 11025(10); MNRJ 50736(301); MNRJ 50741(9); MNRJ 51038(76); MNRJ 51044(5); MNRJ 51051(308); MNRJ 51060(12); MNRJ 51072(1); *Geophagus brasiliensis*: MNRJ 50759(7); MNRJ 51058(1); MNRJ 51066(3); MNRJ 51084(7); MCP 18108(1); MNRJ 50740(2); MNRJ 50756(7); *Gymnotus pantherinus*: MNRJ 51082(9); *Neoplecostomus microps*: MCP 18053(4); MCP 35407(2); MCP 35408(2); MCP 35410(6); MCP 38788(1); MNRJ 12800(3); MNRJ 39018(2); MNRJ 48585(3); MNRJ 50732(1); MNRJ 50735(7); MNRJ 50743(5); MNRJ 50753(2); MNRJ 50763(6); MNRJ 51035(1); MNRJ 51042(21); MNRJ 51046(18); MNRJ 51053(13); MNRJ 51061(7); MNRJ 51074(10); *Oncorhynchus mykiss*: MNRJ 48583(1); MNRJ 51040(1); *Pareiorhaphis garbei*: MCP 35409(10); MCP 35862(2); MNRJ 13592(1); MNRJ 50731(11); MNRJ 51036(9); MZUSP 46967(4); *Parotocinclus maculicauda*: MNRJ 50745(1); MNRJ 50752(10); MNRJ 51077(24); *Phalloceros harpagos*: MCP 17835(1); MCP 18133(2); MNRJ 48587(47); MNRJ 50739(70); MNRJ 50747(3); MNRJ 50757(21); MNRJ 51048(6); MNRJ 51057(5); MNRJ 51083(58); *Poecilia reticulata*: MNRJ 50758(2); *Rhamdia quelen*: MNRJ 50761(2); MNRJ 51064(5); MNRJ 51080(8); *Rhamdioglanis transfasciatus*: MCP 17775(1); MNRJ 21291(1); MNRJ 48586(9); MNRJ 50733(3); MNRJ 50734(14); MNRJ 50746(2); MNRJ 50755(12); MNRJ 50765(1); MNRJ 51037(10); MNRJ 51043(2); MNRJ 51047(2);

MNRJ 51056(5); MNRJ 51065(2); MNRJ 51081(6); *Rineloricaria nudipectoris*: MCP 18092(2); MNRJ 28473(2); MNRJ 28474(1); MNRJ 28475(5); MNRJ 28476(2); MNRJ 50750(15); MNRJ 50760(9); MNRJ 50766(3); MNRJ 51054(8); MNRJ 51062(2); MNRJ 51075(7); MNRJ 51076(48); *Schizolecis guentheri*: MCP 10991(2); MCP 18115(45); MNRJ 21264(24); MNRJ 50744(21); MNRJ 50751(89); MNRJ 50764(10); MNRJ 51055(38); MNRJ 51063(2); MNRJ 51078(77); *Scleromystax barbatus*: MCP 18045(3); MNRJ 28477(11); MNRJ 28478(13); MNRJ 50754(13); MNRJ 51073(10); MCP 17790(1); *Trichomycterus caipora*: MNRJ 48588(4); MNRJ 50738(2); MNRJ 50767(1); MNRJ 51041(1); MNRJ 51052(3); MNRJ 51067(1); MZUSP 42140(2).

### **Microbacias de Jurubatiba**

Município de Conceição de Carapebus:

*Acanthistius brasiliensis*: NPM 243(1); *Anchoa marinii*: NPM 450(8); *Anchovia clupeioides*: NPM 233(37); NPM 237(3); NPM 487(1); NPM 549(92); NPM 829(5); *Astyanax lacustris*: MBML 12473(12); MNRJ 25989(1); MNRJ 37612(10); MNRJ 39352(8); MNRJ 48670(1); MNRJ 51348(5); NPM 24(417); NPM 627(3); NPM 826(2); NPM 6310(1); *Atherinella brasiliensis*: MNRJ 48666(14); NPM 5406(30); NPM 6185(37); *Australoheros oblongus*: MNRJ 24226(3); MNRJ 28459(8); MNRJ 48677(5); NPM 5307(2); NPM 6237(7); UFRJ 7599(7); UFRJ 7606(1); UFRJ 7607(3); *Awaous tajasica*: MNRJ 24234(1); MNRJ 48675(6); NPM 470(22); *Brachyhypopomus janeiroensis*: NPM 1573(4); *Caranx hippos*: NPM 104(3); NPM 448(2); *Centropomus parallelus*: MNRJ 24237(1); MNRJ 32423(3); MNRJ 48676(1); NPM 827(1); NPM 1791(4); MNRJ 37608(2); NPM 488(3); *Cetengraulis edentulus*: NPM 97(1); *Conodon nobilis*: NPM 447(1); *Coptodon rendalli*: MNRJ 24228(3); NPM 6273(13); NPM 6301(2); *Crenicichla lacustris*: NPM 6276(3); *Ctenogobius boleosoma*: NPM 460(32); *Cyphocharax gilbert*: MNRJ 24236(1); MNRJ 32417(26); MNRJ 37605(1); MNRJ 37611(19); MNRJ 48667(4); NPM 26(22); NPM 479(25); NPM 664(65); NPM 807(16); NPM 6178(2); *Deuterodon giton*: MNRJ 37603(10); NPM 404(3); *Deuterodon luetkenii*: MNRJ 24238(3); MNRJ 28463(5); MNRJ 32418(8); MNRJ 48678(5); NPM 509(53); NPM 574(26); NPM 6316(41); *Diapterus rhombeus*: MNRJ 10858(1); *Eucinostomus argenteus*: MNRJ 10859(2); MNRJ 32414(30); MNRJ 37610(7); *Eugerres brasiliensis*: NPM 103(2); *Genidens genidens*: MNRJ 24235(1); *Geophagus brasiliensis*: MBML 12471(6); MNRJ 24218(3); MNRJ 32413(25); MNRJ 37607(18); MNRJ 37617(21); MNRJ 48671(3); NPM 485(132); NPM 583(93); NPM 821(71); NPM 825(2); NPM 5308(9); NPM 6239(15); NPM 6274(2); NPM 6302(1); *Gobionellus oceanicus*: MNRJ 32415(1); NPM 538(1); *Harengula jaguana*: NPM 102(3); NPM 6376(1); *Hoplerythrinus unitaeniatus*: MNRJ 25992(1); NPM 823(2); *Hoplias malabaricus*: MBML 12470(1); MNRJ 24219(3); MNRJ 32416(3); MNRJ 37604(1); NPM 144(8); NPM 483(7); NPM 548(1); NPM 599(6); NPM 600(7); NPM 601(14); NPM 806(4); NPM 808(4); NPM 809(4); NPM 4081(1); NPM 6294(1); *Hoplosternum littorale*: MNRJ 40962(1); *Hyphessobrycon bifasciatus*: MBML 12472(3); MNRJ 24225(3); MNRJ 28460(13); MNRJ 32419(107); MNRJ 37602(49); MNRJ 37615(148); MNRJ 48672(15); NPM 510(721); NPM 535(11); NPM 577(2); NPM 594(296); NPM 608(3); NPM 609(5); NPM 820(648); NPM 824(2); NPM 4084(51); NPM 6190(280); NPM 6284(96); NPM 6296(1021); NPM 6317(1); *Hyphessobrycon boulengeri*: MNRJ 37616(2); NPM 500(16); NPM 572(1); NPM 819(56); NPM 4082(1); NPM 6293(2); *Hyporhamphus roberti*: MNRJ 48669(2); NPM 242(2); NPM 455(3); *Jenynsia darwini*: NPM 3141(132); *Lile piquitinga*: MNRJ 37609(11); MNRJ 39351(29); NPM 426(4); NPM 427(2); NPM 429(2); *Lycengraulis grossidens*: MNRJ 24227(2); NPM 98(7); NPM 461(1); NPM 552(4); *Metynnis lippincottianus*: NPM 6188(1); *Metynnis maculatus*: NPM 859(4); *Mugil liza*: MNRJ 48916(1); NPM 145(1); NPM 146(1); Não identificada: MNRJ 32421(7); *Oligoplites palometa*: NPM 4034(2); *Oligosarcus hepsetus*: MNRJ 11760(1); MNRJ 24224(3); MNRJ 25991(1); MNRJ 32424(31); MNRJ 37613(6); NPM 489(10); NPM 615(2); NPM 6236(3); NPM 6272(3); *Phalloceros harpagos*: MNRJ 24220(3); MNRJ 28462(3); NPM 539(2); NPM 576(44); NPM 818(13); NPM 4083(1); NPM 5418(7); NPM 6295(16); *Platanichthys platana*: MNRJ 24229(1); MNRJ 48679(16); NPM 6585(9); NPM 6586(2); *Poecilia vivipara*: MNRJ 28461(3); MNRJ 32420(85); MNRJ 37606(2); MNRJ 48673(11); NPM 517(6); NPM 604(1); NPM 2932(25); NPM 5417(63); NPM 6176(17); NPM 6240(360); *Pseudophallus mindii*: NPM 402(1); *Rhamdia quelen*: MNRJ 32425(1); MNRJ 32426(1); NPM 27(1); NPM 481(2); *Rhonciscus crocro*: NPM 105(1); *Sphoeroides greeleyi*: NPM 449(4); *Stephanolepis hispidus*: NPM 472(1); *Synbranchus marmoratus*: NPM 748(1); NPM 1855(1); *Trachelyopterus striatulus*: MNRJ 32422(1); MNRJ 37614(2); MNRJ 48668(1); NPM 480(3); NPM 623(3); NPM 805(8); *Trachinotus carolinus*: NPM 469(7); *Trachinotus falcatus*: NPM 468(35); *Trinectes microphthalmus*: NPM 443(2); *Trinectes paulistanus*: MNRJ 48674(1); NPM 236(2); NPM 471(1).

### **Microbacias de Jurubatiba**

Município de Macaé:

*Astyanax lacustris*: MBML 12476(3); MBML 12500(1); MNRJ 32371(10); MNRJ 32381(38); MNRJ 32388(5); MNRJ 32405(42); MNRJ 32412(35); MNRJ 32427(1); MNRJ 37578(4); MNRJ 37582(41); MNRJ 37590(1); MNRJ 37597(17); MNRJ 39347(34); NPM 14(24); NPM 498(9); NPM 501(5); NPM 512(11); NPM 514(550); NPM 516(5); NPM 520(3);

NPM 592(5); NPM 597(123); NPM 624(238); NPM 630(131); NPM 791(13); NPM 796(18); NPM 831(1); *Australoheros oblongus*: DZSRP 13060(4); MNRJ 32391(5); NPM 569(1); NPM 584(1); NPM 603(1); NPM 822(1); NPM 840(1); *Callichthys callichthys*: MNRJ 32433(7); *Centropomus parallelus*: NPM 663(38); *Cyphocharax gilbert*: MBML 12474(8); MNRJ 32395(47); MNRJ 37592(31); MNRJ 37600(3); NPM 478(45); NPM 495(28); NPM 507(1); NPM 621(31); NPM 628(48); NPM 636(1); NPM 665(209); NPM 798(9); NPM 811(41); NPM 828(2); NPM 832(3); *Deuterodon giton*: MBML 12499(15); MBML 12501(1); MNRJ 32375(1); *Deuterodon luetkenii*: MNRJ 32370(692); MNRJ 32376(2); MNRJ 32387(16); MNRJ 32403(2); MNRJ 32410(3); MNRJ 32428(16); NPM 15(329); NPM 21(34); NPM 477(826); NPM 496(59); NPM 499(88); NPM 511(41); NPM 513(234); NPM 532(10); NPM 570(20); NPM 582(9); NPM 588(32); NPM 598(50); NPM 606(11); NPM 610(11); NPM 613(2); NPM 629(181); NPM 634(1447); NPM 781(1420); NPM 784(8); NPM 792(536); NPM 803(6); NPM 816(31); NPM 841(8); *Deuterodon taeniatus*: DZSRP 13063(4); MNRJ 37588(185); MNRJ 37594(81); *Eucinostomus argenteus*: NPM 494(6); *Geophagus brasiliensis*: DZSRP 13062(8); MBML 12475(12); MBML 12502(1); MNRJ 32369(10); MNRJ 32396(2); MNRJ 37585(1); NPM 25(8); NPM 484(1); NPM 490(41); NPM 491(5); NPM 593(10); NPM 596(7); NPM 619(26); NPM 620(110); NPM 635(1); NPM 789(10); NPM 797(3); NPM 813(23); NPM 833(3); NPM 837(1); *Hoplerethrinus unitaeniatus*: MNRJ 32401(1); NPM 452(1); *Hoplias malabaricus*: DZSRP 13059(2); MNRJ 32372(1); MNRJ 32385(4); MNRJ 32394(1); MNRJ 32402(5); MNRJ 32408(14); MNRJ 32432(3); MNRJ 37580(1); NPM 22(2); NPM 486(1); NPM 504(2); NPM 515(1); NPM 523(1); NPM 591(1); NPM 605(5); NPM 617(3); NPM 618(3); NPM 637(1); NPM 782(3); NPM 836(2); NPM 835(1); *Hyphessobrycon bifasciatus*: MBML 12477(1); MBML 12498(25); MNRJ 32365(64); MNRJ 32380(17); MNRJ 32386(89); MNRJ 32393(47); MNRJ 32400(4); MNRJ 32407(83); MNRJ 32429(15); MNRJ 37584(12); MNRJ 37587(17); MNRJ 37593(2); MNRJ 37601(9); NPM 19(9); NPM 506(16); NPM 508(55); NPM 518(18); NPM 519(2); NPM 528(27); NPM 534(124); NPM 568(2); NPM 573(1); NPM 585(5); NPM 587(2); NPM 589(137); NPM 602(12); NPM 612(3); NPM 631(128); NPM 633(238); NPM 783(4); NPM 786(10); NPM 801(177); NPM 804(12); NPM 815(14); *Hyphessobrycon boulengeri*: MNRJ 32409(21); MNRJ 37581(11); NPM 18(6); NPM 526(1); NPM 530(27); NPM 531(9); NPM 533(6); NPM 575(12); *Lycengraulis grossidens*: NPM 838(1); *Mugil liza*: NPM 662(1); Não identificada: MNRJ 32397(6); MNRJ 32404(2); MNRJ 32411(2); *Oligosarcus hepsetus*: NPM 16(12); NPM 395(3); NPM 493(6); NPM 614(2); NPM 616(8); NPM 626(6); NPM 812(2); NPM 830(2); NPM 839(4); *Phalloceros harpagos*: MBML 12504(29); MBML 12505(4); MNRJ 32367(234); MNRJ 32368(41); MNRJ 32374(25); MNRJ 32378(103); MNRJ 32379(20); MNRJ 32383(35); MNRJ 32384(11); MNRJ 32389(28); MNRJ 32390(15); MNRJ 32392(6); MNRJ 32398(20); MNRJ 32399(53); MNRJ 32406(39); MNRJ 32430(197); MNRJ 32431(51); MNRJ 37579(2); MNRJ 37583(2); MNRJ 37586(107); MNRJ 37589(40); MNRJ 37598(6); MNRJ 39348(16); NPM 20(102); NPM 23(28); NPM 497(23); NPM 505(16); NPM 522(171); NPM 525(1); NPM 536(37); NPM 537(184); NPM 540(1); NPM 541(1); NPM 578(21); NPM 581(1); NPM 611(11); NPM 785(155); NPM 790(319); NPM 793(166); NPM 800(7); NPM 802(5); NPM 502(28); NPM 586(2); NPM 817(107); *Poecilia vivipara*: DZSRP 13061(11); MBML 12503(1); MBML 12506(5); MNRJ 32366(98); MNRJ 32373(3); MNRJ 32382(6); MNRJ 37591(7); MNRJ 37595(1); MNRJ 37599(2); NPM 17(14); NPM 503(5); NPM 521(13); NPM 524(40); NPM 529(8); NPM 567(2); NPM 571(8); NPM 579(1); NPM 580(2); NPM 590(7); NPM 607(133); NPM 632(128); NPM 788(22); NPM 794(367); NPM 799(18); NPM 814(7); MNRJ 32377(1); MNRJ 37596(2); NPM 482(2); NPM 595(1); NPM 622(1); NPM 787(1); NPM 795(2); *Synbranchus marmoratus*: NPM 314(1); NPM 3890(1); NPM 3891(1); *Trachelyopterus striatulus*: NPM 625(4); NPM 810(24); NPM 834(2).

## **RH-9 Região Hidrográfica Baixo Paraíba do Sul e Itabapoana**

### **Microbacias de Jurubatiba**

Município de Carapebus:

*Astyanax lacustris*: MBML 12433(5); MBML 12443(4); MBML 12456(6); MBML 12461(3); MBML 12518(1); MBML 12519(1); MBML 12524(10); NPM 397(17); NPM 403(19); NPM 6309(1); UFRGS 18910(1); *Australoheros oblongus*: NPM 6242(20); NPM 6269(18); UFRGS 18911(1); *Coptodon rendalli*: NPM 6171(74); NPM 6241(299); *Cyphocharax gilbert*: MBML 12434(1); MBML 12458(1); *Deuterodon giton*: MBML 12455(20); MBML 12463(74); MBML 12511(2); MBML 12521(29); UFRGS 18904(16); UFRGS 18906(10); *Deuterodon luetkenii*: NPM 391(2); NPM 6312(10); *Geophagus brasiliensis*: MBML 12445(1); MBML 12453(1); MBML 12510(1); NPM 392(3); NPM 394(3); NPM 6172(7); NPM 6243(21); NPM 6305(2); UFRGS 18905(1); *Gymnotus carapo*: MBML 12438(2); *Hisonotus thayeri*: MBML 12512(1); *Hoplerethrinus unitaeniatus*: MBML 12457(2); NPM 1567(3); NPM 6270(1); *Hoplias malabaricus*: MBML 12437(1); MBML 12447(1); MBML 12513(1); NPM 6177(1); NPM 6281(1); UFRGS 18912(3); *Hyphessobrycon bifasciatus*: MBML 12435(12); MBML 12448(21); MBML 12454(10); MBML 12462(24); MBML 12514(88); MBML 12520(7); NPM 6292(192); UFRGS 18909(4); *Hyphessobrycon boulengeri*: MBML 12432(7); *Metynnis lippincottianus*: NPM 6238(2); *Oligosarcus hepsetus*: UFRGS 18903(1); *Phalloceros harpagos*: MBML 12436(2); MBML 12444(10); MBML 12449(92);

MBML 12451(11); MBML 12460(3); MBML 12507(83); MBML 12509(253); MBML 12522(3); MBML 12523(8); MBML 12525(11); MBML 12526(5); UFRGS 18908(17); *Poecilia vivipara*: MBML 12446(1); MBML 12450(26); MBML 12452(1); MBML 12459(4); MBML 12508(21); NPM 3140(8); NPM 6271(2); NPM 6282(46); NPM 6287(1); UFRGS 18907(13).

### **Microbacias de Jurubatiba**

Município de Quissamã:

*Acentronichthys leptos*: NPM 2418(1); *Anchovia clupeioides*: NPM 50(3); NPM 2398(5); *Astyanax lacustris*: MNRJ 24231(3); NPM 54(5); NPM 2348(2); NPM 2388(6); *Atherinella brasiliensis*: MNRJ 24230(3); NPM 56(7); NPM 66(74); NPM 2356(3); NPM 2357(30); NPM 2367(30); NPM 2389(10); NPM 6184(14); NPM 6268(110); NPM 6303(3); *Atlantirivulus jurubatibensis*: NPM 553(20); NPM 1859(10); NPM 2425(21); *Awaous tajasica*: NPM 2346(1); *Callichthys callichthys*: MNRJ 42353(2); NPM 2384(1); *Coptodon rendalli*: NPM 2343(5); NPM 2347(10); NPM 2351(3); NPM 2352(5); NPM 2365(1); NPM 2373(4); NPM 6258(1); *Ctenogobius boleosoma*: NPM 70(1); *Deuterodon giton*: USNM 257524(177); *Deuterodon luetkenii*: NPM 6311(1); *Geophagus brasiliensis*: NPM 57(7); NPM 68(19); NPM 2359(50); NPM 2364(6); NPM 2366(3); NPM 2374(10); NPM 2375(15); NPM 2391(15); NPM 2399(1); NPM 2401(5); *Gobionellus oceanicus*: NPM 2342(2); NPM 2361(1); *Gymnotus carapo*: NPM 1857(1); NPM 1858(1); *Hoplerythrinus unitaeniatus*: MNRJ 24232(3); NPM 2345(2); NPM 2354(6); NPM 2355(2); NPM 2363(7); NPM 2378(3); NPM 2393(15); NPM 2409(6); NPM 6275(19); NPM 6291(2); *Hoplias malabaricus*: NPM 67(3); NPM 2344(3); NPM 2362(1); NPM 2370(2); NPM 2390(2); NPM 2396(1); *Hyphessobrycon bifasciatus*: NPM 55(15); NPM 65(248); NPM 2349(60); NPM 2350(8); NPM 2371(25); NPM 2372(60); NPM 2383(60); NPM 2392(60); NPM 2397(15); NPM 6182(34); NPM 6286(38); NPM 6300(111); NPM 6304(303); *Hyphessobrycon boulengeri*: MNRJ 10959(13); MNRJ 25990(1); NPM 2353(60); NPM 2376(3); NPM 2379(5); NPM 2380(3); NPM 2387(2); NPM 2404(3); NPM 2410(60); NPM 2417(60); NPM 6289(8); *Jenynsia darwini*: NPM 71(1); NPM 2358(1); NPM 2360(90); NPM 2403(15); NPM 2405(60); NPM 2406(60); NPM 2415(50); NPM 2423(10); NPM 2938(25); NPM 2939(44); NPM 6167(18); NPM 6259(18); *Lycengraulis grossidens*: NPM 2341(5); NPM 2382(3); *Micropogonias furnieri*: NPM 51(27); NPM 69(11); NPM 2340(1); *Mugil liza*: NPM 2400(1); *Phalloceros harpagos*: NPM 2408(40); NPM 5428(412); *Phalloptychus januaris*: NPM 638(5); NPM 639(3); NPM 640(2); NPM 641(2); NPM 642(2); NPM 2308(35); NPM 2311(72); NPM 2312(23); NPM 2369(60); NPM 2377(1); NPM 2381(60); NPM 2412(100); NPM 2416(60); NPM 2421(50); NPM 6169(66); NPM 6260(1221); NPM 6264(2020); NPM 6265(5472); *Platanichthys platana*: NPM 53(1); NPM 2394(50); *Poecilia reticulata*: NPM 2368(40); NPM 2385(60); NPM 2395(1); NPM 2402(70); NPM 2407(1); NPM 2413(60); NPM 2419(90); NPM 2420(40); NPM 2422(50); NPM 2424(50); NPM 2931(30); NPM 4080(80); NPM 5429(71); NPM 6168(174); NPM 6261(2944); NPM 6263(962); NPM 6266(112); NPM 6277(1280); NPM 6278(770); NPM 6290(2); *Rhamdia quelen*: NPM 52(1); *Synbranchus marmoratus*: NPM 2386(2); NPM 2411(1); *Trachelyopterus striatulus*: MNRJ 24233(1); *Trinectes paulistanus*: NPM 2414(2);

### **Microbacias da Lagoa Feia**

Município de Campos dos Goytacazes:

*Acentronichthys leptos*: MZUSP 121340(2); MZUSP 121361(4); *Anchoviella lepidentostole*: MBML 5561(7); MBML 6415(3); MNRJ 49787(9); *Astyanax lacustris*: MBML 12419(34); MBML 12478(14); MBML 12484(1); MNRJ 49657(10); MNRJ 52412(2); MZUSP 121332(3); MZUSP 121474(2); MZUSP 124780(11); NPM 5504(58); NPM 5506(7); *Atherinella brasiliensis*: MBML 5532(17); MBML 5540(6); MBML 5542(24); MBML 5579(14); MBML 5599(2); MBML 5601(11); *Australoheros ipatinguensis*: MBML 5545(1); MBML 5593(11); MBML 5605(2); MBML 12405(1); MBML 12408(1); MNRJ 3567(1); MNRJ 8576(20); MNRJ 45359(3); MNRJ 49656(10); MZUSP 2581(1); MZUSP 121324(18); NPM 5484(6); NPM 5485(4); *Awaous tajasica*: MBML 5556(2); MNRJ 49786(2); *Brachyhypopomus janeiroensis*: FMNH 54547(4); MNRJ 15593(1); *Brycon insignis*: MNRJ 45201(1); MZUSP 2091(4); MZUSP 79088(1); MZUSP 79091(1); MZUSP 79092(1); *Bryconamericus tenuis*: MNRJ 52413(6); *Centropomus parallelus*: MBML 6435(1); MNRJ 49789(1); *Centropomus undecimalis*: MNRJ 3586(1); *Characidium interruptum*: MBML 12496(3); MNRJ 39158(2); MNRJ 39255(1); MZUSP 121303(50); MZUSP 121304(4); MZUSP 121317(11); MZUSP 124775(43); MZUSP 124783(1); MZUSP 125645(34); *Characidium litorale*: MNRJ 38935(21); MNRJ 38936(1); MNRJ 39157(2); MZUSP 115488(3); MZUSP 121288(1); MZUSP 121318(1); MZUSP 121359(2); *Coptodon rendalli*: MBML 5520(2); MBML 5547(2); MBML 5564(1); MBML 5607(3); *Corydoras nattereri*: MZUSP 121292(15); MZUSP 121326(15); *Crenicichla lacustris*: MBML 5552(1); MBML 12480(3); MNRJ 14399(1); MNRJ 15902(1); MNRJ 20018(4); MNRJ 52417(1); MZUSP 2532(3); MZUSP 121290(2); MZUSP 121328(1); NPM 5479(1); NPM 5511(5); *Ctenogobius stigmaticus*: MBML 5533(1); *Cyphocharax gilbert*: MBML 5559(5); MBML 5567(4); MBML 12486(14); MNRJ 3573(2); MNRJ 8575(23); MNRJ 49659(1); MZUSP 1600(3); MZUSP 2052(9); MZUSP 2092(1); MZUSP 121291(2); MZUSP 121473(1); MZUSP 124781(1); NPM 5483(7); NPM 5486(1); NPM 5495(4); NPM 5510(5); *Deuterodon giton*: MBML 5543(4); MBML 6417(4); MBML 12412(1); MBML

12497(128); MZUSP 121294(66); MZUSP 121297(5); MZUSP 121316(7); MZUSP 121335(5); MZUSP 121336(4); NPM 5474(2); NPM 5490(2); *Deuterodon taeniatum*: MNRJ 51711(17); MZUSP 87979(1); MZUSP 121301(90); MZUSP 121323(78); MZUSP 121368(209); NPM 5469(19); NPM 5488(2); NPM 5489(2); NPM 5494(2); NPM 5508(82); *Diapterus auratus*: MBML 5535(8); *Diapterus rhombeus*: MBML 6436(1); *Eigenmannia virescens*: MBML 12495(2); MNRJ 3558(1); MNRJ 49790(1); MZUSP 1776(5); MZUSP 62485(2); *Eucinostomus argenteus*: NPM 5465(1); *Genidens genidens*: MBML 5534(9); MBML 6414(2); NPM 5509(45); *Geophagus brasiliensis*: MBML 5551(2); MBML 5577(7); MBML 5596(15); MBML 12414(4); MBML 12426(1); MBML 12485(5); MNRJ 3555(1); MNRJ 17848(12); MNRJ 25709(2); MNRJ 44265(3); MNRJ 45345(2); MZUSP 2556(5); NPM 5466(3); NPM 5468(4); *Glanidium melanopteron*: MNRJ 3585(1); MNRJ 48860(1); *Gymnotus carapo*: MBML 12422(1); MBML 12491(1); *Gymnotus pantherinus*: MNRJ 50082(1); NPM 5498(2); *Hisonotus notatus*: MBML 12489(2); MZUSP 121287(1); MZUSP 121302(45); MZUSP 121319(18); MZUSP 121333(18); *Hoplerythrinus unitaeniatum*: MBML 12423(2); MBML 12431(2); MNRJ 14145(1); MZUSP 2072(4); *Hoplias malabaricus*: MBML 5519(4); MBML 5563(2); MBML 5595(1); MBML 6418(1); MBML 6434(1); MBML 12413(1); MBML 12417(1); MBML 12427(1); MNRJ 3582(2); MNRJ 6100(18); MNRJ 8577(4); MNRJ 45358(2); MNRJ 49793(1); MZUSP 1502(2); MZUSP 121315(2); NPM 5467(3); NPM 5499(3); *Hoplosternum littorale*: MBML 12420(1); MBML 12424(11); MBML 12425(1); *Hyphessobrycon bifasciatus*: MBML 5541(12); MBML 5555(7); MBML 5568(12); MBML 5571(28); MBML 5594(12); MBML 5608(30); MBML 6419(19); MBML 12406(5); MBML 12410(61); MBML 12418(144); MBML 12421(6); MBML 12430(163); MNRJ 45357(13); NPM 5470(38); NPM 5473(62); NPM 5482(36); *Hyphessobrycon boulengeri*: MBML 12407(1); *Hyphessobrycon eques*: MBML 12493(4); MNRJ 52414(91); NPM 5481(12); NPM 5487(11); *Hypomasticus copelandii*: MNRJ 3590(1); MZUSP 1354(7); *Hypostomus affinis*: MBML 12488(7); MNRJ 3574(1); MZUSP 121320(1); NPM 5502(5); *Hypostomus luetkeni*: MNRJ 49138(2); MNRJ 52415(1); MZUSP 121327(2); MZUSP 121338(2); *Imparfinis minutus*: MZUSP 121285(3); MZUSP 121330(2); *Jenynsia darwini*: MBML 5590(8); MBML 5600(1); MBML 5611(2); NPM 3143(186); NPM 6297(39); NPM 6298(237); *Listrura tetra radiata*: MZUSP 124777(1); *Loricariichthys castaneus*: MBML 5553(3); MBML 5569(1); MBML 12415(1); MBML 12479(6); MNRJ 3578(1); MNRJ 3579(1); MNRJ 3589(1); MNRJ 51375(1); NPM 5517(2); *Lycengraulis grossidens*: MNRJ 3571(3); *Megaleporinus conirostris*: MBML 12490(1); MNRJ 17791(2); MNRJ 49425(1); MNRJ 49426(1); MNRJ 49427(1); MZUSP 1352(2); MZUSP 87963(1); *Menticirrhus americanus*: MZUSP 123263(1); *Metynnis lippincottianus*: NPM 5475(4); *Microglanis parahybae*: MBML 12492(8); MZUSP 121322(2); MZUSP 121329(3); NPM 5477(8); *Microphis lineatus*: MBML 5592(1); *Micropogonias furnieri*: MBML 6437(1); *Mimagoniates microlepis*: MZUSP 118708(1); MZUSP 118709(12); MZUSP 118710(3); MZUSP 121286(17); *Mugil curema*: MBML 5528(114); MBML 6413(2); MNRJ 49791(1); *Mugil liza*: MBML 6433(1); *Oligosarcus hepsetus*: MBML 5546(3); MBML 5550(3); MBML 5557(6); MBML 5558(1); MBML 5566(5); MBML 5576(1); MBML 12481(2); MBML 12482(1); MNRJ 3587(2); MNRJ 50482(1); MZUSP 1736(1); MZUSP 4735(1); MZUSP 4736(1); MZUSP 121293(2); MZUSP 124779(2); NPM 5476(1); *Oreochromis niloticus*: MBML 6420(1); MBML 6438(1); *Pachyurus adspersus*: MBML 12494(1); MNRJ 3570(1); MNRJ 45346(2); MNRJ 49674(18); MZUSP 1149(1); MZUSP 121300(1); MZUSP 121472(1); *Paragenidens grandoculis*: MZUSP 2295(1); *Phalloceros harpagos*: MBML 12416(1); MBML 12428(21); MNRJ 49658(8); NPM 5478(8); *Phallopterychus januarius*: MBML 5530(2); MBML 5537(3); MBML 5538(19); MBML 5544(2); MBML 5548(13); MBML 5573(23); MBML 5575(1); MBML 5580(3); MBML 5602(25); MBML 5606(28); MBML 5610(1); MBML 8670(1); *Phallotorynus fasciolatus*: MBML 5589(28); MBML 5603(19); *Pimelodella lateristriga*: MBML 5560(3); MBML 12483(1); MNRJ 48940(1); MZUSP 121289(2); MZUSP 121305(1); MZUSP 121334(4); MZUSP 121337(9); MZUSP 121357(1); NPM 5505(16); *Poecilia vivipara*: MBML 5529(30); MBML 5539(215); MBML 5549(103); MBML 5572(1); MBML 5574(25); MBML 5578(13); MBML 5581(1); MBML 5591(27); MBML 5597(21); MBML 5604(48); MBML 5609(50); MBML 6416(82); MBML 8668(1); MBML 8669(2); MBML 12409(26); MBML 12411(4); MBML 12429(52); MBML 12487(9); MNRJ 52416(100); NPM 5471(45); NPM 5497(12); *Pomatomus saltatrix*: MBML 5536(1); *Prochilodus lineatus*: MNRJ 3566(1); *Prochilodus vimboides*: MZUSP 1541(1); MZUSP 2047(1); MZUSP 117146(12); MZUSP 121370(1); *Psalidodon parahybae*: MBML 5554(1); MBML 5562(2); MBML 5565(25); MBML 5570(49); MBML 5598(2); MNRJ 49660(5); NPM 5507(11); *Pseudotothyris janeirensis*: MZUSP 121321(1); MZUSP 121331(2); MZUSP 121360(2); MZUSP 124782(7); MZUSP 124785(6); *Rhamdia quelen*: MNRJ 3548(8); MNRJ 15572(1); MNRJ 44266(1); MNRJ 48939(2); MZUSP 2235(5); MZUSP 121325(1); MZUSP 121342(12); MZUSP 121356(1); *Rineloricaria steindachneri*: MNRJ 14034(2); MZUSP 121295(2); MZUSP 121341(1); *Sardinella brasiliensis*: MNRJ 18004(2); *Scleromystax barbatus*: MZUSP 121339(6); *Trachelyopterus striatulus*: NPM 5491(1); *Trichomycterus puriventris*: MZUSP 121358(1); *Ulaema lefroyi*: MBML 5531(118).

#### **Microbacias da Lagoa Feia**

Município de Carapebus:

*Hoplerythrinus unitaeniatus*: MBML 12516(1); *Hoplias malabaricus*: MBML 12439(2); *Hoplosternum littorale*: MBML 12515(5); *Hyphessobrycon bifasciatus*: MBML 12441(117); *Hyphessobrycon boulengeri*: MBML 12517(1); *Poecilia vivipara*: MBML 12440(23);

#### **Microbacias da Lagoa Feia**

Município de Conceição de Macabu:

*Deuterodon heterostomus*: MNRJ 15363(1); *Deuterodon taeniatus*: MNRJ 11062(1); MNRJ 11169(1); *Hoplias malabaricus*: MNRJ 13505(1); *Hyphessobrycon bifasciatus*: MNRJ 14056(19); *Parachromis managuensis*: NPM 1796(1); *Pimelodella lateristriga*: MCP 36676(14); MNRJ 11284(21); *Scleromystax prionotos*: MCP 36656(1); *Synbranchus marmoratus*: NPM 1856(1); *Trichomycterus caipora*: UFRJ 7257(69);

#### **Microbacias da Lagoa Feia**

Município de Quissamã:

*Astyanax lacustris*: MBML 12469(34); MNRJ 10957(7); MNRJ 17792(3); NPM 5492(6); NPM 5496(4); NPM 6308(11); NPM 6313(1); NPM 6314(2); NPM 6315(5); *Atherinella brasiliensis*: MNRJ 17508(3); MNRJ 45484(11); NPM 5480(1); NPM 6166(363); NPM 6179(78); NPM 6187(22); NPM 6249(21); NPM 6267(21); *Australoheros oblongus*: MNRJ 18012(1); *Brachyhyopomus janeiroensis*: MNRJ 17509(1); *Brycon insignis*: NPM 5514(1); *Callichthys callichthys*: MBML 12442(11); *Coptodon rendalli*: NPM 6186(1); *Corydoras nattereri*: MNRJ 18002(11); MNRJ 18020(1); *Crenicichla lacustris*: MNRJ 14391(1); *Cyphocharax gilbert*: MBML 12464(1); *Deuterodon giton*: MBML 12467(48); MNRJ 14716(1); *Deuterodon luetkenii*: MCP 36667(10); MCP 36672(19); MNRJ 40289(1); *Geophagus brasiliensis*: MNRJ 17512(4); MNRJ 45569(6); NPM 6248(7); *Glanidium melanopterum*: MNRJ 18007(1); *Hoplerythrinus unitaeniatus*: MNRJ 14151(7); MNRJ 17514(3); *Hoplias malabaricus*: MNRJ 10956(1); MNRJ 17511(5); *Hyphessobrycon bifasciatus*: MBML 12468(16); MCP 36669(25); MNRJ 10958(2); MNRJ 14061(8); MNRJ 17513(7); NPM 6170(24); NPM 6175(278); NPM 6279(5); NPM 6285(12); NPM 6288(40); *Hyphessobrycon boulengeri*: MNRJ 17515(12); *Hyphessobrycon flammeus*: MNRJ 14555(4); *Jenynsia darwini*: MNRJ 17510(1); MNRJ 17516(3); MNRJ 24223(4); MNRJ 45071(11); NPM 2940(30); NPM 3142(298); NPM 5501(117); NPM 6174(37); NPM 6181(18); NPM 6183(10); NPM 6189(3); NPM 6252(69); *Lile piquitinga*: MNRJ 14444(1); *Loricariichthys castaneus*: MNRJ 21526(1); MNRJ 21527(2); NPM 5516(4); *Lycengraulis grossidens*: MNRJ 15395(4); *Oligosarcus hepsetus*: MNRJ 10955(1); NPM 5515(5); *Oreochromis niloticus*: NPM 5472(1); *Phalloceros harpagos*: MBML 12465(6); MCP 36638(12); MCP 36648(25); *Phalloptychus januarius*: MNRJ 24222(4); MNRJ 45070(97); NPM 2313(59); NPM 2316(677); NPM 5421(178); NPM 5423(65); NPM 5425(58); NPM 5427(143); NPM 5512(308); NPM 6180(85); NPM 6245(2); NPM 6251(6); NPM 6256(34); *Platanichthys platana*: NPM 6246(56); NPM 6254(18); NPM 6257(7); *Poecilia vivipara*: MBML 12466(11); MCP 36636(8); MNRJ 24221(4); MNRJ 45069(7); NPM 2328(88); NPM 2929(103); NPM 2930(25); NPM 5420(96); NPM 5422(244); NPM 5424(141); NPM 5426(24); NPM 5500(140); NPM 6173(30); NPM 6244(25); NPM 6247(93); NPM 6250(5); NPM 6253(5); NPM 6255(12); NPM 6280(3); *Psalidodon parahybae*: MNRJ 10954(6); NPM 5493(3); NPM 5503(5); NPM 5513(27); *Rhamdia quelen*: MCP 36674(1); *Sardinella brasiliensis*: MNRJ 14673(1).

#### **Microbacias da Lagoa Feia**

Município de Santa Maria Madalena:

*Deuterodon taeniatus*: MNRJ 11013(1); MNRJ 20832(63); MNRJ 49902(3); MNRJ 49903(2); MNRJ 49904(3); *Gymnotus pantherinus*: MNRJ 46193(1); MNRJ 48681(1); *Hisonotus thayeri*: MNRJ 20835(5); *Rineloricaria steindachneri*: MNRJ 21659(2).

#### **Microbacias da Lagoa Feia**

Município de São João da Barra:

*Australoheros oblongus*: MNRJ 39366(3); *Cyphocharax gilbert*: MNRJ 39368(1); *Geophagus brasiliensis*: MNRJ 39367(2); *Hoplerythrinus unitaeniatus*: MNRJ 39370(1); *Hoplias malabaricus*: MNRJ 39371(3); *Hoplosternum littorale*: MNRJ 39369(1); *Poecilia vivipara*: MNRJ 39373(6); *Psalidodon parahybae*: MNRJ 39372(14).

#### **Microbacias da Lagoa Feia**

Município de Trajano de Moraes:

*Trichomycterus caipora*: UFRJ 6583(1); UFRJ 7247(12); UFRJ 7614(3); UFRJ 31924(12);

#### **Bacia do Rio Paraíba do Sul**

Município de Aperibé:

*Colossoma macropomum*: MNRJ 49482(3); *Cyphocharax gilbert*: MNRJ 8546(1);

### **Bacia do Rio Paraíba do Sul**

Município de Cambuci:

*Crenicichla lacustris*: MNRJ 14397(1); *Deuterodon luetkenii*: MNRJ 18001(5); *Hoplias malabaricus*: MNRJ 21278(2); *Hypostomus luetkeni*: MNRJ 15575(9); *Oligosarcus hepsetus*: MNRJ 37779(1); *Psalidodon parahybae*: MNRJ 18006(12);

### **Bacia do Rio Paraíba do Sul**

Município de Campos dos Goytacazes:

*Anchoviella cayennensis*: NPM 1884(5); *Anchoviella lepidentostole*: MZUSP 88259(28); *Astyanax lacustris*: MNRJ 16604(2); MNRJ 16606(2); MNRJ 16613(136); MNRJ 16619(9); MNRJ 16627(15); MNRJ 16628(11); MNRJ 16629(11); MNRJ 16635(17); MNRJ 16664(1); MNRJ 16734(2); MNRJ 17436(4); MNRJ 38720(5); *Australoheros ipatinguensis*: MNRJ 14821(1); MNRJ 15172(1); MNRJ 15510(1); MNRJ 16528(1); *Brachyhypopomus janeiroensis*: FMNH 15201(6); FMNH 54545(27); *Brycon insignis*: MNRJ 5632(3); MZUSP 86779(1); MZUSP 103045(4); MZUSP 107280(1); *Brycon opalinus*: MZUSP 117331(1); *Bryconamericus tenuis*: MZUSP 114713(16); *Characidium interruptum*: MNRJ 15117(3); *Coptodon rendalli*: MZUSP 44086(1); *Corydoras nattereri*: MNRJ 14241(2); ZUEC 17166(1); *Crenicichla lacustris*: MNRJ 3549(1); MNRJ 3588(1); MNRJ 5625(8); MNRJ 8740(1); MNRJ 9846(1); MNRJ 13394(11); MNRJ 14400(3); MZUSP 114718(2); *Cyphocharax gilbert*: MCP 20371(1); MCP 20381(1); MCP 20383(1); MNRJ 5624(4); MNRJ 12845(14); MNRJ 12846(7); MNRJ 12847(36); MNRJ 12848(1); MNRJ 12849(9); MNRJ 12850(8); MNRJ 12851(9); MNRJ 12852(7); MNRJ 12853(4); MNRJ 12854(2); MNRJ 12855(17); MNRJ 12856(1); MNRJ 12876(4); MNRJ 26217(10); MZUSP 114715(1); *Deuterodon giton*: MCP 20368(1); MNRJ 16274(7); MNRJ 16294(81); MNRJ 16500(322); MNRJ 16721(4); MNRJ 16767(16); MZUSP 114710(70); *Deuterodon luetkenii*: MNRJ 13543(57); MNRJ 16755(23); MNRJ 16766(6); MNRJ 16768(6); *Deuterodon taeniatus*: MNRJ 15586(2); MNRJ 16281(1); MNRJ 22276(10); *Geophagus brasiliensis*: MNRJ 3542(3); MNRJ 5627(5); MNRJ 14600(2); MNRJ 14602(20); MNRJ 14626(17); MNRJ 14627(37); MNRJ 14835(3); MNRJ 14837(4); MNRJ 16498(3); MNRJ 16504(2); MNRJ 16936(1); MNRJ 16939(4); MNRJ 16943(4); MNRJ 50045(1); *Gymnotus carapo*: MNRJ 14653(1); MNRJ 14666(1); MZUSP 114717(1); *Hisonotus notatus*: MZUSP 114716(23); *Hoplerethrinus unitaeniatus*: MZUSP 86776(5); MZUSP 117329(6); *Hoplias malabaricus*: MNRJ 5630(3); MNRJ 5631(3); MNRJ 8715(1); MNRJ 13384(2); MNRJ 14744(1); MNRJ 16756(2); MNRJ 16769(2); MNRJ 16876(2); MNRJ 16937(1); MNRJ 16940(2); MNRJ 17346(1); *Hoplosternum littorale*: MNRJ 12305(4); *Hyphessobrycon bifasciatus*: MNRJ 16741(2); MNRJ 16761(6); MNRJ 16764(1); MNRJ 16773(1); MNRJ 17097(3); MZUSP 114711(4); *Hyphessobrycon boulengeri*: MZUSP 114712(178); *Hyphessobrycon eques*: MNRJ 14751(4); MNRJ 16762(4); MNRJ 16763(3); *Hypomasticus copelandii*: MCP 20382(1); MCP 20386(1); MNRJ 14659(63); MNRJ 16501(1); MNRJ 16503(1); MNRJ 16760(3); MNRJ 20016(1); MNRJ 41559(1); MZUSP 86775(2); MZUSP 86777(1); *Hypostomus affinis*: MNRJ 5629(2); MNRJ 17844(1); *Hypostomus luetkeni*: MNRJ 637(1); MNRJ 17836(1); *Knodus moenkhausii*: MNRJ 15179(3); MZUSP 36989(2); ZUEC 17165(3); *Loricariichthys castaneus*: MNRJ 5628(6); MNRJ 16029(1); MNRJ 16057(14); MNRJ 16058(4); MNRJ 17872(1); MZUSP 117330(11); *Megaleporinus conirostris*: MNRJ 16770(1); MNRJ 16771(1); MZUSP 107281(1); *Microglanis parahybae*: MNRJ 5763(15); *Mugil liza*: MNRJ 13846(1); Não identificada: MNRJ 16758(4); *Oligosarcus hepsetus*: MCP 20372(1); MCP 20388(1); MNRJ 16502(3); MNRJ 16506(5); MNRJ 16507(1); MNRJ 16509(1); MNRJ 16512(2); MNRJ 16757(18); MNRJ 17098(1); MZUSP 114714(1); *Otocinclus affinis*: MNRJ 16055(11); *Otothyris lophophanes*: MNRJ 15932(4); MNRJ 16007(23); MNRJ 16008(8); ZUEC 17168(1); *Phalloceros harpagos*: MZUSP 114719(2); *Phalloptychus januarius*: MNRJ 3552(8); *Pimelodus maculatus*: MNRJ 16956(3); *Platanichthys platana*: MNRJ 14485(1); MNRJ 14486(1); MNRJ 14489(2); MNRJ 15161(15); *Poecilia vivipara*: MNRJ 15924(1); MNRJ 15929(2); MNRJ 15938(1); MNRJ 16015(2); MNRJ 16021(2); MNRJ 16044(19); ZUEC 17167(7); *Polycentrus schomburgkii*: MNRJ 29149(3); *Prochilodus lineatus*: MNRJ 11280(1); MNRJ 16508(10); MNRJ 16759(7); MNRJ 16765(1); MNRJ 16772(3); MNRJ 16774(58); MNRJ 16935(5); MNRJ 16938(5); MNRJ 16944(9); MNRJ 17457(15); MNRJ 18016(13); MNRJ 50043(5); *Prochilodus vimboides*: MNRJ 14656(64); MNRJ 16497(6); *Psalidodon parahybae*: MNRJ 3554(4); MNRJ 16278(4); MNRJ 16286(2); MNRJ 16298(24); MNRJ 16304(1); MNRJ 16307(60); MNRJ 16505(30); MNRJ 16645(2); MNRJ 16934(4); MNRJ 18009(94); *Rhamdia quelen*: MNRJ 856(1); MNRJ 12401(1); *Salminus brasiliensis*: MNRJ 14840(1); MZUSP 86778(1); *Trachelyopterus striatulus*: MNRJ 5626(6); MNRJ 16250(4); MNRJ 16252(1); MNRJ 16260(1); MNRJ 16264(2).

### **Bacia do Rio Paraíba do Sul**

Município de Cardoso Moreira:

*Astyanax lacustris*: MZUSP 3148(5); MZUSP 16410(11); *Brycon insignis*: MZUSP 3043(1); *Characidium alipioi*: MNRJ 44196(3); *Crenicichla lacustris*: MZUSP 3150(1); MZUSP 41203(1); ZUEC 17156(4); *Cyphocharax gilbert*: ZUEC 17164(1);

*Deuterodon giton*: MZUSP 26597(1); *Deuterodon taeniatus*: ZUEC 17157(11); *Geophagus brasiliensis*: MZUSP 3146(3); MZUSP 50771(1); *Hypomasticus copelandii*: MZUSP 3045(2); MZUSP 3144(1); *Hypostomus luetkeni*: MZUSP 3143(3); *Knodus moenkhausii*: ZUEC 17158(13); *Megaleporinus conirostris*: MZUSP 3145(1); *Oligosarcus hepsetus*: ZUEC 17159(2); *Pimelodella lateristriga*: MZUSP 3149(3); ZUEC 17162(1); *Poecilia vivipara*: ZUEC 17160(11); *Prochilodus vimboides*: MZUSP 20665(1); *Psalidodon parahybae*: ZUEC 17161(5); *Scleromystax barbatus*: ZUEC 17163(1).

### **Bacia do Rio Paraíba do Sul**

Município de Itaíba:

*Astyanax lacustris*: MZUSP 114720(7); *Australoheros ipatinguensis*: MNRJ 16527(2); *Bryconamericus tenuis*: MZUSP 114722(11); *Centropomus parallelus*: MZUSP 3141(3); *Crenicichla lacustris*: MNRJ 15093(4); *Geophagus brasiliensis*: MNRJ 16892(1); MZUSP 114728(1); *Hisonotus notatus*: MNRJ 28243(1); *Hoplias malabaricus*: MNRJ 16891(2); *Hyphessobrycon bifasciatus*: MZUSP 114723(3); *Hyphessobrycon boulengeri*: MZUSP 114725(79); *Hyphessobrycon eques*: MZUSP 114724(1); *Oligosarcus hepsetus*: MZUSP 114726(3); *Pachyurus adspersus*: MZUSP 3757(1); *Pimelodella lateristriga*: MNRJ 16890(1); MZUSP 114727(7); *Poecilia vivipara*: MNRJ 15934(14); *Psalidodon parahybae*: MZUSP 114721(153).

### **Bacia do Rio Paraíba do Sul**

Município de Itaperuna:

*Astyanax lacustris*: MNRJ 4788(1); MNRJ 10938(59); MNRJ 16599(2); MNRJ 16608(5); MNRJ 16615(1); MNRJ 16618(6); MNRJ 16620(2); MNRJ 16622(2); MNRJ 16623(5); MNRJ 16648(34); MNRJ 16652(4); MNRJ 16732(20); MNRJ 42507(4); MNRJ 47299(6); *Australoheros ipatinguensis*: MCP 42584(1); MNRJ 14694(4); MNRJ 14700(6); MNRJ 14723(4); MNRJ 14733(6); MNRJ 14736(1); MNRJ 15505(1); MNRJ 16780(5); MNRJ 16787(5); MNRJ 16814(5); MNRJ 16854(1); MNRJ 16856(2); MNRJ 32181(1); MNRJ 47307(79); MZUSP 114739(4); *Awaous tajasica*: MNRJ 17849(1); MNRJ 17851(1); *Brycon insignis*: MNRJ 4761(1); MNRJ 11226(1); MNRJ 18246(1); *Bryconamericus tenuis*: MZUSP 114731(5); *Callichthys callichthys*: MNRJ 4545(8); MNRJ 5140(140); *Centropomus parallelus*: MNRJ 13850(2); *Characidium alipioi*: MNRJ 5961(20); MNRJ 11695(20); MNRJ 15119(1); MNRJ 15121(2); MNRJ 15130(6); MNRJ 15131(1); MNRJ 47302(2); *Corydoras nattereri*: MNRJ 14250(1); *Crenicichla lacustris*: MNRJ 14393(1); MNRJ 14394(6); MNRJ 14396(7); MNRJ 14699(1); MNRJ 14759(2); MNRJ 15010(11); MNRJ 15066(2); MNRJ 15098(1); MNRJ 15105(1); MNRJ 15503(1); MNRJ 16776(1); MNRJ 16804(6); MNRJ 16817(1); MNRJ 42499(34); MNRJ 42518(3); MZUSP 114709(1); MZUSP 114740(1); *Cyphocharax gilbert*: MNRJ 10944(1); MNRJ 12857(8); MNRJ 12858(14); MNRJ 12859(34); MNRJ 12860(1); MNRJ 12861(2); MNRJ 12862(3); MNRJ 12865(3); MNRJ 14701(4); MNRJ 16905(7); MZUSP 114685(1); *Deuterodon giton*: MNRJ 10940(80); MNRJ 10945(91); MNRJ 16311(1); MNRJ 16533(26); MNRJ 16667(1); MNRJ 16679(1); MNRJ 16926(1); MNRJ 42490(1); MZUSP 114683(49); *Deuterodon intermedius*: MNRJ 16616(33); *Deuterodon luetkenii*: MNRJ 10939(67); MNRJ 10946(56); MNRJ 16738(10); MNRJ 16777(7); MNRJ 16783(20); MNRJ 16785(11); MNRJ 16789(17); MNRJ 16796(4); MNRJ 16799(64); MNRJ 16801(5); MNRJ 16802(4); MNRJ 16806(26); MNRJ 16824(11); MNRJ 16903(57); MNRJ 16930(16); MNRJ 18019(3); MNRJ 42492(21); MNRJ 42509(40); MNRJ 47300(46); MZUSP 114729(7); *Deuterodon taeniatus*: MNRJ 16601(2); MNRJ 42508(22); MZUSP 114733(1); *Eigenmannia virescens*: MNRJ 14670(1); *Geophagus brasiliensis*: MNRJ 14310(5); MNRJ 14319(5); MNRJ 14322(5); MNRJ 14601(3); MNRJ 14617(3); MNRJ 14628(20); MNRJ 14693(12); MNRJ 14705(4); MNRJ 14727(4); MNRJ 14735(9); MNRJ 14737(16); MNRJ 15504(7); MNRJ 16826(26); MNRJ 16904(4); MNRJ 16929(13); MNRJ 42500(23); MNRJ 42519(8); MNRJ 47308(34); MZUSP 114692(2); MZUSP 114738(52); *Glanidium melanopteron*: MNRJ 16247(2); MNRJ 17473(1); *Gymnotus carapo*: MNRJ 16816(1); MNRJ 42504(1); MNRJ 42516(4); MZUSP 114737(2); *Harttia loricariformis*: MNRJ 11783(3); MNRJ 12146(1); MNRJ 42513(1); MNRJ 42514(2); *Hisonotus notatus*: MNRJ 15923(2); MNRJ 15935(1); MNRJ 42495(2); *Hisonotus thayeri*: MNRJ 16009(1); MNRJ 16010(4); MNRJ 16486(1); MNRJ 16827(7); MNRJ 16928(5); MZUSP 114734(19); *Hoplias malabaricus*: MNRJ 13546(1); MNRJ 16782(1); MNRJ 16794(2); MNRJ 16795(3); MNRJ 16811(2); MNRJ 16818(1); MNRJ 16855(1); MNRJ 16863(5); MNRJ 16932(1); MNRJ 17465(1); MNRJ 17846(2); MNRJ 42502(1); MNRJ 42511(6); MNRJ 47303(2); MZUSP 114686(1); *Hoplosternum littorale*: MZUSP 114736(1); *Hyphessobrycon bifasciatus*: MZUSP 114730(6); *Hyphessobrycon eques*: MNRJ 16775(4); MNRJ 16781(5); MNRJ 16784(4); MNRJ 16786(1); MNRJ 16793(5); MNRJ 16797(1); MNRJ 16808(3); MNRJ 16819(7); MNRJ 42491(30); *Hypomasticus copelandii*: MNRJ 13484(19); MNRJ 13485(6); MNRJ 16529(1); MNRJ 16790(6); MNRJ 16798(4); MNRJ 16820(5); MNRJ 16927(1); MNRJ 28495(1); MNRJ 42512(1); *Hypomasticus mormyrops*: MZUSP 114687(2); *Hypostomus affinis*: MZUSP 114690(1); *Hypostomus luetkeni*: MNRJ 15945(1); MNRJ 16016(1); MNRJ 16035(22); MNRJ 16487(2); MNRJ 17841(1); MNRJ 17894(10); MNRJ 29150(2); MNRJ 29151(2); MNRJ 37426(2); MNRJ 42503(5); MNRJ 42520(3); MNRJ 47305(1); *Hypostomus vermicularis*: MNRJ 17461(3); MNRJ 17862(1); *Imparfinis minutus*: MNRJ 16809(2); *Knodus moenkhausii*:



MNRJ 42501(1); *Loricariichthys castaneus*: MNRJ 13948(2); MNRJ 16026(3); MNRJ 16030(1); MNRJ 16251(1); MNRJ 16822(1); MNRJ 17858(1); MNRJ 29152(1); *Megaleporinus conirostris*: MNRJ 16523(4); MNRJ 16779(1); MNRJ 16800(1); MNRJ 16859(8); MNRJ 16860(3); MNRJ 42489(1); MZUSP 114688(1); *Microglanis parahybae*: MNRJ 16047(5); MNRJ 16815(3); MNRJ 42497(17); Não identificada: MNRJ 4816(49); MNRJ 4835(5); MNRJ 4836(40); MNRJ 4837(3); MNRJ 4884(54); MNRJ 5079(1); MNRJ 5700(1); MNRJ 5802(1); *Oligosarcus hepsetus*: MNRJ 10947(15); MNRJ 16488(16); MNRJ 16510(1); MNRJ 16518(2); MNRJ 16778(2); MNRJ 16788(8); MNRJ 16791(1); MNRJ 16792(4); MNRJ 16810(3); MNRJ 16812(10); MNRJ 16857(2); MNRJ 16858(8); MNRJ 16861(2); MNRJ 16862(16); MNRJ 16931(6); MNRJ 17108(13); MNRJ 42493(7); MNRJ 42510(10); MNRJ 47301(1); MZUSP 114684(2); MZUSP 114708(1); MZUSP 114732(8); MNRJ 47309(1); *Pachyurus adspersus*: MNRJ 15088(1); MZUSP 114693(1); *Parotocinclus muriaensis*: MNRJ 14753(5); MNRJ 28528(1); MNRJ 42496(5); *Pimelodella lateristriga*: MNRJ 16499(1); MNRJ 16740(1); MNRJ 16803(2); MNRJ 16805(4); MNRJ 16807(2); MNRJ 17539(1); MNRJ 42515(4); MNRJ 47304(1); MZUSP 114735(1); *Pimelodus maculatus*: MZUSP 114689(7); *Poecilia vivipara*: MNRJ 14748(2); MNRJ 15925(13); MNRJ 15926(4); MNRJ 15927(30); MNRJ 15933(3); MNRJ 15950(20); MNRJ 15957(3); MNRJ 15964(1); MNRJ 15968(7); MNRJ 16003(1); MNRJ 16017(13); MNRJ 16019(7); MNRJ 16024(17); MNRJ 16050(1); MNRJ 16821(6); MNRJ 42498(24); MNRJ 42517(48); MNRJ 47306(2); *Prochilodus vimboides*: MNRJ 14779(6); MNRJ 16864(9); MNRJ 16906(2); *Psalidodon parahybae*: MNRJ 15423(39); MNRJ 16287(1); MNRJ 16296(9); MNRJ 16300(77); MNRJ 16521(6); MNRJ 16522(1); MNRJ 16626(1); MNRJ 16633(1); MNRJ 16640(6); MNRJ 16646(1); MNRJ 16650(6); MNRJ 16651(3); MNRJ 16654(1); MNRJ 16658(15); MNRJ 16659(1); MNRJ 16712(47); MNRJ 16726(1); MNRJ 16729(4); MNRJ 16825(47); MNRJ 42573(1); MNRJ 48319(1); MNRJ 51374(1); *Rhamdia quelen*: MNRJ 12383(1); MNRJ 16823(1); *Rineloricaria steindachneri*: MNRJ 13950(1); MNRJ 13974(1); MNRJ 13977(1); MNRJ 13996(1); MNRJ 42678(2); *Scleromystax prionotos*: MNRJ 4790(1); *Trachelyopterus striatulus*: MNRJ 14766(5); MNRJ 16249(1); MNRJ 16261(2); MZUSP 114691(1); *Trichomycterus largoperculatus*: MNRJ 42494(1).

#### **Bacia do Rio Paraíba do Sul**

Município de Laje do Muriaé:

*Astyanax lacustris*: MNRJ 48549(23); *Australoheros ipatinguensis*: MNRJ 48554(10); *Bryconamericus tenuis*: MNRJ 48550(1); *Hoplias malabaricus*: MNRJ 48555(2); *Hyphessobrycon eques*: MNRJ 48551(1); *Poecilia vivipara*: MNRJ 48553(1); *Rineloricaria steindachneri*: MNRJ 48552(1).

#### **Bacia do Rio Paraíba do Sul**

Município de Natividade:

*Deuterodon giton*: MZUSP 114751(4); *Geophagus brasiliensis*: MZUSP 114757(1); *Hoplias malabaricus*: MZUSP 114752(1); *Hypostomus luetkeni*: MZUSP 114753(2); *Loricariichthys castaneus*: MZUSP 114754(1); *Pimelodus maculatus*: MZUSP 114755(1); *Trachelyopterus striatulus*: MZUSP 114756(3).

#### **Bacia do Rio Paraíba do Sul**

Município de Santo Antônio de Pádua:

*Australoheros ipatinguensis*: MNRJ 16478(1); MNRJ 42487(1); MNRJ 42488(1); *Bryconamericus tenuis*: MNRJ 16879(1); *Callichthys callichthys*: MNRJ 14755(2); *Characidium alipioi*: MNRJ 11698(1); *Cichla kelberi*: MNRJ 45371(1); *Corydoras nattereri*: MNRJ 14236(3); *Crenicichla lacustris*: MNRJ 42484(5); MNRJ 45411(3); *Cyphocharax gilbert*: MNRJ 12870(2); *Deuterodon giton*: MNRJ 16283(11); MNRJ 16288(5); MNRJ 16669(8); *Deuterodon taeniatus*: MNRJ 42479(28); *Geophagus brasiliensis*: MNRJ 14308(2); MNRJ 14336(8); MNRJ 14731(1); MNRJ 14833(2); MNRJ 42485(11); MNRJ 45421(1); *Glanidium melanopteron*: MNRJ 15995(1); MNRJ 48859(4); *Hisonotus thayeri*: MNRJ 42481(21); *Hoplias malabaricus*: MNRJ 17118(1); *Hypostomus luetkeni*: MNRJ 16482(5); MNRJ 16491(1); MNRJ 42482(4); *Knodus moenkhausii*: MNRJ 42480(7); *Loricariichthys castaneus*: MNRJ 14031(4); *Megaleporinus conirostris*: MNRJ 45394(1); *Mugil liza*: MNRJ 13852(1); MNRJ 13853(1); *Oligosarcus hepsetus*: MNRJ 16880(2); *Pachyurus adspersus*: MNRJ 15325(1); *Pimelodus maculatus*: MNRJ 16005(1); MNRJ 45391(1); *Poecilia vivipara*: MNRJ 15920(9); MNRJ 15952(8); MNRJ 42483(1); *Polycentrus schomburgkii*: MNRJ 45377(1); *Psalidodon parahybae*: MNRJ 16666(1); *Rineloricaria nigricauda*: MNRJ 15379(4); *Rineloricaria steindachneri*: MNRJ 13994(5); MNRJ 13995(2); MNRJ 17824(2); *Synbranchus marmoratus*: MNRJ 42486(1).

#### **Bacia do Rio Paraíba do Sul**

Município de São Francisco de Itabapoana:

*Achirus lineatus*: MNRJ 49734(9); NPM 4358(1); *Anchoa januaria*: NPM 744(18); *Anchoa tricolor*: NPM 11716(5); *Anchovia clupeoides*: NPM 11563(7); NPM 11565(1); *Anchoviella brevirostris*: MNRJ 49242(1); NPM 11609(15);

*Archosargus probatocephalus*: NPM 69953(1); *Astroscoptes ygraecum*: NPM 55198(1); *Astyanax lacustris*: MZUSP 16923(88); MZUSP 16929(42); MZUSP 16931(122); *Atherinella brasiliensis*: MZUSP 67474(9); NPM 743(3); NPM 67611(3); NPM 75115(1); NPM 75116(1); *Bathygobius soporator*: MZUSP 66369(19); MZUSP 66371(1); NPM 66584(8); *Brevoortia pectinata*: MZUSP 11724(1); *Caranx hippos*: NPM 8641(17); *Caranx latus*: MZUSP 8644(8); NPM 764(2); NPM 8645(3); *Catathyridium garmani*: MNRJ 49652(2); *Cathorops spixii*: NPM 906(1); *Centropomus parallelus*: MZUSP 71554(3); *Centropomus undecimalis*: MZUSP 71579(1); MZUSP 71581(1); NPM 71577(4); *Chaetodipterus faber*: NPM 69452(1); *Citharichthys arenaceus*: NPM 763(6); *Citharichthys spilopterus*: MNRJ 49735(4); MZUSP 71880(3); NPM 762(1); NPM 71887(1); NPM 72107(1); *Ctenogobius boleosoma*: MNRJ 49239(5); *Cyphocharax gilbert*: MZUSP 20811(1); *Diapterus rhombeus*: MZUSP 41367(1); NPM 745(3); *Dormitator maculatus*: MZUSP 10322(2); MZUSP 65345(25); MZUSP 65354(16); *Eleotris pisonis*: MNRJ 49244(3); MZUSP 65008(4); *Eucinostomus argenteus*: MZUSP 41558(4); NPM 41520(3); NPM 41543(6); *Evorthodus lyricus*: MZUSP 10324(1); MZUSP 10325(1); MZUSP 66361(2); NPM 66355(2); *Genidens genidens*: MNRJ 39802(1); NPM 907(72); *Geophagus brasiliensis*: MNRJ 39801(1); MZUSP 45018(1); MZUSP 45023(2); *Gobioides broussonnetii*: MNRJ 49240(2); *Gobionellus boleosoma*: MZUSP 66302(1); NPM 66078(1); NPM 66301(1); *Gobionellus oceanicus*: MNRJ 49243(7); MZUSP 12766(3); NPM 12771(3); NPM 12776(3); NPM 66004(4); *Gobionellus stomatus*: NPM 65983(1); *Guavina guavina*: MZUSP 10329(1); MZUSP 10330(1); MZUSP 10331(1); MZUSP 10332(1); MZUSP 10333(1); MZUSP 64916(1); MZUSP 64981(1); MZUSP 64982(1); *Haemulon plumieri*: MNRJ 49228(1); MNRJ 49231(1); *Hoplosternum littorale*: MNRJ 39800(1); *Hyporhamphus unifasciatus*: MZUSP 67728(1); *Jenynsia darwini*: MZUSP 63853(4); MZUSP 63859(6); NPM 63863(2); *Lutjanus jocu*: NPM 66029(2); NPM 66036(1); NPM 66051(7); *Lycengraulis grossidens*: NPM 11715(4); *Megaleporinus conirostris*: MZUSP 47894(1); *Microphis lineatus*: MNRJ 49241(2); MZUSP 9412(14); MZUSP 64510(3); NPM 64513(1); *Micropogonias furnieri*: NPM 69866(2); *Mugil curema*: MZUSP 67339(21); MZUSP 67346(8); NPM 746(10); NPM 885(1); NPM 67355(4); MZUSP 115084(1); NPM 67319(203); *Myrophis punctatus*: NPM 768(4); Não identificada: MZUSP 12761(7); *Oligoplites saliens*: NPM 8708(1); *Phalloptychus januarius*: MZUSP 64019(1); *Pimelodella lateristriga*: MZUSP 22786(1); NPM 881(8); *Platanichthys platana*: NPM 11067(11); *Poecilia vivipara*: MZUSP 64039(8); MZUSP 64049(13); MZUSP 64058(16); MZUSP 64131(30); *Polydactylus oligodon*: NPM 12794(1); NPM 12813(1); *Pomadasys ramosus*: MNRJ 49089(1); MNRJ 49090(1); MNRJ 49976(1); *Prochilodus lineatus*: MZUSP 20809(29); MZUSP 42664(1); *Prochilodus vimboides*: MZUSP 20804(3); MZUSP 20810(1); *Psalidodon parahybae*: MZUSP 16867(2); MZUSP 16922(32); MZUSP 16928(32); MZUSP 16930(90); *Rhonciscus crocro*: MNRJ 50659(1); *Selene vomer*: NPM 8785(1); *Sphoeroides greeleyi*: NPM 71978(1); *Sphoeroides testudineus*: MZUSP 45091(2); MZUSP 71922(49); NPM 71916(7); *Syngnathus folletti*: NPM 9413(1); *Trinectes microphthalmus*: NPM 757(2); *Trinectes paulistanus*: MNRJ 51384(648); NPM 4355(1).

## **Bacia do Rio Paraíba do Sul**

Município de São João da Barra:

*Astyanax lacustris*: MNRJ 39816(11); MZUSP 16807(4); MZUSP 16808(3); MZUSP 16815(19); MZUSP 16816(110); MZUSP 16817(6); MZUSP 16924(108); MZUSP 16925(101); MZUSP 16926(203); MZUSP 16927(30); *Atherinella brasiliensis*: MZUSP 75117(25); *Australoheros ipatinguensis*: MNRJ 39814(2); MZUSP 2579(7); MZUSP 16159(7); MZUSP 50682(11); *Awaous tajassica*: MZUSP 2608(1); MZUSP 10319(1); MZUSP 1085(1); *Bairdiella ronchus*: MZUSP 2500(2); *Bathygobius soporator*: MZUSP 2610(1); NPM 685(1); NPM 66573(2); *Brachyhypopomus janaeirensis*: MZUSP 22702(9); MZUSP 22703(1); *Brevoortia pectinata*: MZUSP 1310(9); *Callichthys callichthys*: MNRJ 48538(1); *Caranx hippos*: MZUSP 2077(10); *Caranx latus*: MZUSP 8647(2); *Catathyridium garmani*: MZUSP 1173(1); *Cathorops spixii*: MZUSP 2300(2); *Centropomus parallelus*: MZUSP 2387(3); MZUSP 71548(3); MZUSP 71556(1); *Centropomus undecimalis*: MZUSP 71572(6); *Chaetodipterus faber*: MZUSP 3179(3); *Coptodon rendalli*: MNRJ 48540(30); *Crenicichla lacustris*: MZUSP 1110(1); MZUSP 41215(2); *Ctenogobius boleosoma*: MZUSP 65981(1); MZUSP 65990(2); MZUSP 65994(2); MZUSP 66076(3); *Cyphocharax gilbert*: MZUSP 20774(6); MZUSP 20775(6); MZUSP 20806(6); MZUSP 20808(1); MZUSP 20812(1); MZUSP 20822(2); MZUSP 21438(6); USNM 295938(4); *Deuterodon luetkenii*: MZUSP 16679(1); MZUSP 16811(87); MZUSP 16813(129); MZUSP 16814(14); MZUSP 16826(1); MZUSP 16830(112); *Diapterus rhombeus*: MZUSP 41368(28); NPM 41349(101); *Dormitator maculatus*: MZUSP 65342(4); MZUSP 65343(4); MZUSP 65344(1); MZUSP 65348(1); MZUSP 65350(13); MZUSP 65353(1); *Eigenmannia virescens*: MZUSP 1774(4); MZUSP 22706(1); *Eleotris pisonis*: MZUSP 10323(1); MZUSP 64993(1); MZUSP 64994(1); MZUSP 65004(4); MZUSP 65006(4); MZUSP 65010(1); MZUSP 65011(1); MZUSP 65012(1); *Elops saurus*: MZUSP 1316(1); *Eucinostomus argenteus*: MZUSP 10291(36); MZUSP 10294(11); NPM 41572(175); *Eugerres brasilianus*: MZUSP 2416(13); *Evorthodus lyricus*: NPM 66360(1); *Genidens machadoi*: NPM 2297(1); *Geophagus brasiliensis*: MNRJ 1275(2); MNRJ 5597(3); MNRJ 39811(1); MZUSP 2554(13); MZUSP 44991(1); MZUSP 45016(1); MZUSP 45017(12); MZUSP 45019(15); MZUSP 45020(4); MZUSP

45021(4); MZUSP 45022(8); MZUSP 45024(1); MZUSP 45025(10); MZUSP 45026(61); MZUSP 45110(5); MZUSP 45111(9); MNRJ 46204(1); NPM 66007(60); *Guavina guavina*: MZUSP 1370(1); NPM 64917(1); *Gymnothorax ocellatus*: MNRJ 4130(2); *Gymnotus carapo*: MZUSP 2650(1); MZUSP 22700(1); MZUSP 22792(1); *Hisonotus thayeri*: MZUSP 8329(1); *Hoplerythrinus unitaeniatus*: MZUSP 1484(4); MZUSP 22787(1); MZUSP 24473(1); *Hoplias malabaricus*: MZUSP 1493(2); MZUSP 22678(8); MZUSP 22692(3); MZUSP 22785(1); *Hyphessobrycon bifasciatus*: MZUSP 16804(1); MZUSP 16818(1); MZUSP 16819(17); MZUSP 16820(8); MZUSP 16821(4); *Hypomasticus copelandii*: MZUSP 1459(1); MZUSP 2022(1); *Hyporhamphus unifasciatus*: NPM 67731(1); *Hypostomus luetkeni*: MZUSP 2118(2); *Jenynsia darwini*: MZUSP 12801(18); MZUSP 53343(10); NPM 684(10); *Loricariichthys castaneus*: MZUSP 22704(7); MZUSP 22705(1); *Megaleporinus conirostris*: MZUSP 47889(3); *Microphis lineatus*: MNRJ 1554(3); MZUSP 9410(11); MZUSP 9411(15); MZUSP 64508(1); MZUSP 64512(3); MZUSP 64623(1); MZUSP 64626(32); MZUSP 64628(29); MZUSP 64629(54); MZUSP 64630(56); *Micropogonias furnieri*: MZUSP 70003(32); *Mugil liza*: MNRJ 46150(1); *Myrophis punctatus*: MZUSP 12048(1); *Narcine brasiliensis*: MZUSP 9734(1); *Odontesthes argentinensis*: MZUSP 71702(2); *Oligoplites saliens*: MZUSP 2334(3); MNRJ 39810(3); MZUSP 4739(1); MZUSP 4740(1); MZUSP 4741(1); MZUSP 4742(1); MZUSP 4743(1); MZUSP 4744(1); MZUSP 4745(1); MZUSP 7264(1); *Otocinclus affinis*: MZUSP 22707(2); *Otothyris lophophanes*: MNRJ 39812(1); MZUSP 22677(1); *Phalloceros harpagos*: MNRJ 39813(19); *Pimelodella lateristriga*: MZUSP 1087(3); MZUSP 22684(1); MZUSP 22701(23); MZUSP 22770(1); MZUSP 22771(36); MZUSP 22784(9); *Platanichthys platana*: MZUSP 11055(4); *Poecilia reticulata*: MNRJ 48539(79); *Poecilia vivipara*: MZUSP 12759(40); MZUSP 12763(31); MZUSP 12765(1); MZUSP 12768(4); MZUSP 12779(28); MZUSP 12792(27); MZUSP 12802(15); MZUSP 64037(23); MZUSP 64053(4); MZUSP 64056(120); MZUSP 64129(2); *Polydactylus virginicus*: MZUSP 67554(1); *Prochilodus lineatus*: MZUSP 4646(1); MZUSP 4647(1); MZUSP 4648(1); MZUSP 4649(1); MZUSP 4650(1); MZUSP 4651(1); MZUSP 20803(16); MZUSP 20805(9); MZUSP 20807(10); MZUSP 21434(26); MZUSP 21439(3); *Prochilodus vimboides*: MNRJ 39815(8); MZUSP 42663(1); MZUSP 42665(3); MZUSP 42666(3); MZUSP 52000(1); *Psalidodon parahybae*: MNRJ 20871(5); MNRJ 39809(15); MZUSP 1426(4); MZUSP 16805(3); MZUSP 16806(2); MZUSP 16809(22); MZUSP 16810(44); MZUSP 16812(12); MZUSP 16822(1); MZUSP 16933(25); MZUSP 16934(44); MZUSP 16935(165); MZUSP 16936(78); MZUSP 39936(2); MZUSP 75495(1); *Rhamdia quelen*: MZUSP 22791(1); *Rhonciscus crocro*: NPM 2012(1); NPM 68395(1); *Salminus brasiliensis*: MZUSP 19556(3); *Stellifer rastrifer*: MZUSP 70429(228); *Synbranchus marmoratus*: MZUSP 2678(1); MZUSP 42560(1); *Trachelyopterus striatulus*: MZUSP 1077(6); MZUSP 42661(9); MZUSP 42672(9); MZUSP 43461(23); *Trachinotus carolinus*: MZUSP 8809(1).

#### **Bacia do Rio Paraíba do Sul**

Município de São José de Ubá:

*Astyanax lacustris*: MNRJ 47284(13); *Australoheros ipatinguensis*: MCP 54080(1); MNRJ 47291(1); *Cyphocharax gilbert*: MNRJ 47288(15); *Deuterodon intermedius*: MNRJ 47297(2); *Deuterodon luetkenii*: MNRJ 47286(131); MZUSP 114671(9); MZUSP 114674(5); *Geophagus brasiliensis*: MNRJ 47292(12); MZUSP 114681(4); *Gymnotus carapo*: MZUSP 114680(3); *Hisonotus thayeri*: MNRJ 47295(1); MZUSP 114675(41); *Hoplias malabaricus*: MNRJ 47296(2); *Hoplosternum littorale*: MNRJ 47298(6); *Hyphessobrycon bifasciatus*: MNRJ 47285(2); *Ituglanis parahybae*: MZUSP 115069(3); *Oligosarcus hepsetus*: MNRJ 47287(8); MZUSP 114672(7); *Oreochromis niloticus*: MNRJ 47293(4); *Phalloceros harpagos*: MZUSP 114673(2); *Pimelodella lateristriga*: MNRJ 47294(1); MZUSP 114676(37); *Poecilia vivipara*: MZUSP 114682(21); MZUSP 114682(21); *Rhamdia quelen*: MZUSP 114677(17); *Trachelyopterus striatulus*: MNRJ 47289(3); *Trichomycterus puriventris*: MZUSP 114678(1); MZUSP 114679(1).

#### **Microbacias de São Francisco de Itabapoana**

Município de São Francisco de Itabapoana:

*Astyanax lacustris*: MCP 36670(3); MNRJ 16733(3); *Australoheros ipatinguensis*: MCP 36657(5); *Australoheros oblongus*: MCP 36651(1); *Awaous tajassica*: NPM 939(1); *Caranx latus*: NPM 936(1); *Centropomus parallelus*: NPM 934(1); *Cyphocharax gilbert*: MCP 36665(8); *Deuterodon luetkenii*: MCP 36650(33); MCP 36655(295); *Dormitator maculatus*: NPM 772(13); *Eleotris pisonis*: NPM 938(2); *Eucinostomus argenteus*: NPM 876(2); NPM 941(38); *Geophagus brasiliensis*: MCP 36640(8); MCP 36654(2); NPM 937(5); *Hoplerythrinus unitaeniatus*: MNRJ 51751(1); *Hoplias malabaricus*: MCP 36644(1); MNRJ 17540(1); *Hyphessobrycon bifasciatus*: MCP 38199(31); MNRJ 51749(100); *Microphis lineatus*: NPM 940(2); *Mugil liza*: NPM 933(1); *Phalloceros harpagos*: MCP 36641(78); MCP 36660(10); *Poecilia vivipara*: MCP 36642(27); MCP 36675(77); MNRJ 51750(39); NPM 935(1).

#### **Bacia do Rio Itabapoana**

Município de Bom Jesus do Itabapoana:

*Crenicichla lacustris*: MBML 8264(1); MCP 18242(4); *Cyphocharax gilbert*: MZUSP 73937(1); *Delturus parahybae*: MNRJ 51743(1); *Deuterodon giton*: MNRJ 11015(6); MNRJ 11016(6); MNRJ 11017(10); MNRJ 11019(1); *Deuterodon luetkenii*: MNRJ 11018(1); *Deuterodon taeniatus*: MBML 8131(96); MBML 8257(1); MBML 8259(7); MBML 8260(20); MNRJ 11005(2); MNRJ 11006(4); MNRJ 13665(30); *Geophagus brasiliensis*: MBML 8129(21); MBML 8254(15); MNRJ 14975(10); MNRJ 29483(4); *Harttia carvalhoi*: MNRJ 14070(1); *Hoplias malabaricus*: MBML 8128(1); MBML 8258(1); *Hypomasticus mormyrops*: MZUSP 51329(1); *Hypostomus affinis*: MBML 8263(1); *Loricariichthys castaneus*: MNRJ 45065(6); *Neoplecostomus microps*: MNRJ 12801(1); *Parotocinclus muriaensis*: MBML 8262(1); *Pimelodella lateristriga*: MBML 8261(1); *Poecilia vivipara*: MBML 8130(74); MBML 8255(2); MBML 8256(13).

### **Bacia do Rio Itabapoana**

Município de Campos dos Goytacazes:

*Astyanax lacustris*: MCP 17743(3); *Awaous tajasica*: MNRJ 41547(13); *Corydoras nattereri*: MBML 8241(1); *Crenicichla lacustris*: MNRJ 41550(438); *Cyphocharax gilbert*: MBML 8239(3); MNRJ 41543(1); *Deuterodon giton*: MBML 8121(1); MBML 8122(253); MBML 8127(38); MBML 8238(7); MBML 8245(13); MBML 8246(24); MBML 8247(75); MBML 8250(2); MBML 8251(10); MBML 8252(3); MCP 17944(20); MNRJ 41544(64); *Diapterus rhombeus*: MNRJ 41549(1); *Geophagus brasiliensis*: MBML 8124(9); MBML 8126(4); MBML 8240(10); MBML 8253(4); MNRJ 41551(152); MNRJ 41545(15); *Loricariichthys castaneus*: MNRJ 41546(16); *Mugil liza*: MNRJ 41548(3); *Otothyris lophophanes*: MCP 17847(1); *Phalloceros harpagos*: MBML 8171(2); MNRJ 41552(3); *Pimelodella lateristriga*: MBML 8123(7); MBML 8237(6); *Poecilia reticulata*: MBML 8125(28); MBML 8170(2); MBML 8244(2); MBML 8249(8); *Poecilia vivipara*: MBML 8120(78); MBML 8242(27); MBML 8243(6); MBML 8248(10); MCP 18119(5); MNRJ 41553(8); *Prochilodus vimboides*: MNRJ 41541(2); MNRJ 41542(1).

### **Bacia do Rio Itabapoana**

Município de São Francisco de Itabapoana:

*Anchovia clupeioides*: NPM 878(1); *Astyanax lacustris*: MNRJ 49661(2); *Atherinella brasiliensis*: NPM 888(1); NPM 1202(82); *Australoheros oblongus*: MNRJ 49665(3); *Brycon insignis*: MNRJ 49673(4); *Caranx hippos*: NPM 1228(8); *Caranx latus*: NPM 879(2); NPM 1229(13); *Characidium alipioi*: MNRJ 49666(4); *Clarias gariepinus*: MNRJ 40631(1); *Corydoras nattereri*: MNRJ 17992(37); *Cyphocharax gilbert*: MNRJ 11216(11); MNRJ 30982(2); MNRJ 49664(1); *Deuterodon giton*: MNRJ 49662(2); MNRJ 49670(33); *Deuterodon taeniatus*: MNRJ 52408(52); *Eucinostomus argenteus*: NPM 1227(9); *Genidens genidens*: NPM 925(96); NPM 1232(3); *Geophagus brasiliensis*: MNRJ 13668(18); MNRJ 49672(33); *Harttia carvalhoi*: MNRJ 49667(1); MNRJ 49671(21); *Hoplerythrinus unitaeniatus*: MNRJ 52410(11); *Hoplias malabaricus*: MNRJ 40626(2); MNRJ 40627(1); MNRJ 40632(1); *Hyphessobrycon bifasciatus*: MNRJ 52409(108); *Hyporhamphus roberti*: NPM 874(2); *Hypostomus affinis*: MNRJ 49669(2); *Loricariichthys castaneus*: MNRJ 21652(1); *Lycengraulis grossidens*: NPM 877(2); NPM 1200(7); *Microphis lineatus*: NPM 882(1); *Mugil liza*: NPM 1201(1); *Oligosarcus hepsetus*: MNRJ 49668(3); MNRJ 40628(1); MNRJ 40629(1); *Phalloceros harpagos*: MNRJ 49663(1); *Poecilia vivipara*: MNRJ 52411(112); *Pomadasys ramosus*: MNRJ 50091(1); *Prochilodus vimboides*: MNRJ 11277(44); *Scleromystax prionotos*: MNRJ 17994(5); *Syacium micrurum*: NPM 1203(1).
