# Supplementary material for: Fishes and Rivers of the State of Rio de Janeiro, Southeastern Brazil: Biogeographic and Diversity Patterns in a Historically Well-Sampled Territory
Source: Preprints.org preprint supplement (doi:10.20944/preprints202407.0846.v1), 2024-07-11
Supplement: Supplementary file 3 [file supplementary]

**Table S1 - Ichthyological collections with inventoried records from the state of Rio de Janeiro**

| <b>Sigla</b>  |                                                                                                 | <b>Lotes</b>  | <b>%</b> | <b>Origem</b>    |
|---------------|-------------------------------------------------------------------------------------------------|---------------|----------|------------------|
| MNRJ          | Coleção Ictiológica do Museu Nacional do Rio de Janeiro                                         | 9122          | 68.45%   | Curadoria        |
| MZUSP         | Coleção de Peixes do Museu de Zoologia da USP                                                   | 1392          | 10.44%   | Curadoria        |
| NPM           | Coleção de Peixes do NUPEM                                                                      | 1183          | 8.88%    | specieslink      |
| MCP           | Coleção de Peixes da Pontifícia Universidade Católica do Rio Grande do Sul                      | 399           | 2.99%    | specieslink      |
| MBML          | Coleção de Peixes do Instituto Nacional da Mata Atlântica                                       | 389           | 2.92%    | specieslink      |
| DZSJRP        | Coleção de Peixes da Universidade Estadual Paulista - Campus de São José do Rio Preto           | 236           | 1.77%    | specieslink      |
| UFRGS         | Coleção de Peixes da Universidade Federal do Rio Grande do Sul                                  | 201           | 1.51%    | Curadoria        |
| USNM          | Fish Collection of National Museum of Natural History                                           | 126           | 0.95%    | Database on line |
| ZUEC          | Coleção de Peixes do Museu de Zoologia da UNICAMP                                               | 114           | 0.86%    | specieslink      |
| UFRJ          | Coleção de Peixes da Universidade Federal do Rio de Janeiro                                     | 110           | 0.83%    | Literatura       |
| UNT           | Coleção de Peixes do Laboratório de Ictiologia Sistemática da Universidade Federal do Tocantins | 17            | 0.13%    | specieslink      |
| UFMT          | Coleção de Peixes da Universidade Federal de Mato Grosso                                        | 8             | 0.06%    | specieslink      |
| MZFS          | Coleção Científica da Divisão de Peixes do Museu de Zoologia da UFES                            | 4             | 0.03%    | Curadoria        |
| CAS           | Ichthyology Collections of California Academy of Sciences                                       | 3             | 0.02%    | Database on line |
| FMNH          | Florida Museum Fish Collection                                                                  | 3             | 0.02%    | Database on line |
| UMMZ          | Fish Collection of Museum of Zoology of University of Michigan                                  | 3             | 0.02%    | Database on line |
| UMZC          | University Museum of Zoology, University of Cambridge, Cambridge                                | 3             | 0.02%    |                  |
| AMNH          | Ichthyology Collection of Museum of Natural History NYC                                         | 2             | 0.02%    | Database on line |
| MCZ           | Ichthyology Collection at the Museum of Comparative Zoology                                     | 2             | 0.02%    | Database on line |
| MTD           | Senckenberg Naturhistorische Sammlungen (SNSD), Museum für Tierkunde, Dresden                   | 2             | 0.02%    |                  |
| MZUEL         | Coleção de Peixes do Museu de Zoologia da Universidade Estadual de Londrina                     | 2             | 0.02%    | specieslink      |
| INPA          | Coleção de Peixes do Instituto Nacional de Pesquisas da Amazônia                                | 1             | 0.01%    | specieslink      |
| MDF           |                                                                                                 | 1             | 0.01%    |                  |
| NRM           | Ichthyology Collection of Swedish Museum of Natural History                                     | 1             | 0.01%    | Database on line |
| CAS-SU        | Stanford University (SU) collections of fishes (CAS-SU)                                         | 1             | 0.01%    |                  |
| UF            | University of Florida, Florida Museum of Natural History (FLMNH), Gainesville.                  | 1             | 0.01%    |                  |
| UFRN          | Coleção de Peixes da Universidade Federal do Rio Grande do Norte                                | 1             | 0.01%    | Curadoria        |
| <b>TOTAL:</b> |                                                                                                 | <b>13.327</b> |          |                  |
