# Supplementary material for: Fishes and Rivers of the State of Rio de Janeiro, Southeastern Brazil: Biogeographic and Diversity Patterns in a Historically Well-Sampled Territory
Source: Preprints.org preprint supplement (doi:10.20944/preprints202407.0846.v1), 2024-07-11
Supplement: Supplementary file 4 [file supplementary]

**Table S3** - Inventory of all species recorded for the state of Rio de Janeiro.

| Order                       | Family                   | Subfamily                           | Suggested species                  | Author                              |                      |
|-----------------------------|--------------------------|-------------------------------------|------------------------------------|-------------------------------------|----------------------|
| Torpediniformes             | Narcinidae               |                                     | <i>Narcine brasiliensis</i>        | (Olfers, 1831)                      |                      |
| Elopiformes                 | Elopidae                 |                                     | <i>Elops saurus</i>                | Linnaeus, 1766                      |                      |
| Albuliformes                | Albulidae                | Albulinae                           | <i>Albula vulpes</i>               | (Linnaeus, 1758)                    |                      |
| Anguilliformes              | Muraenidae               | Muraeninae                          | <i>Gymnothorax ocellatus</i>       | Agassiz, 1831                       |                      |
|                             | Ophichthidae             | Myrophinae                          | <i>Myrophis punctatus</i>          | Lütken, 1852                        |                      |
|                             |                          | Ophichthinae                        | <i>Ophichthus cylindroideus</i>    | (Ranzani, 1839)                     |                      |
|                             |                          |                                     | <i>Ophichthus gomesii</i>          | (Castelnau, 1855)                   |                      |
| Clupeiformes                | Engraulidae              | Engraulinae                         | <i>Anchoa januaria</i>             | (Steindachner, 1879)                |                      |
|                             |                          |                                     | <i>Anchoa lyolepis</i>             | (Evermann & Marsh, 1900)            |                      |
|                             |                          |                                     | <i>Anchoa marinii</i>              | Hildebrand, 1943                    |                      |
|                             |                          |                                     | <i>Anchoa tricolor</i>             | (Spix & Agassiz, 1829)              |                      |
|                             |                          |                                     | <i>Anchovia clupeoides</i>         | (Swainson, 1839)                    |                      |
|                             |                          |                                     | <i>Anchoviella brevirostris</i>    | (Günther, 1868)                     |                      |
|                             |                          |                                     | <i>Anchoviella cayennensis</i>     | (Puyo, 1946)                        |                      |
|                             |                          |                                     | <i>Anchoviella lepidentostole</i>  | (Fowler, 1911)                      |                      |
|                             |                          |                                     | <i>Cetengraulis edentulus</i>      | (Cuvier, 1829)                      |                      |
|                             |                          |                                     | <i>Engraulis anchoita</i>          | Hubbs & Marini, 1935                |                      |
|                             |                          |                                     | <i>Lycengraulis grossidens</i>     | (Spix & Agassiz, 1829)              |                      |
|                             |                          |                                     | <i>Pellona harroweri</i>           | (Fowler, 1917)                      |                      |
|                             |                          |                                     | <i>Brevoortia pectinata</i>        | (Jenyns, 1842)                      |                      |
|                             |                          |                                     | <i>Harengula clupeola</i>          | (Cuvier, 1829)                      |                      |
|                             | <i>Harengula jaguana</i> | Poey, 1865                          |                                    |                                     |                      |
|                             | Pristigasteridae         |                                     | <i>Lile piquitinga</i>             | (Schreiner & Miranda Ribeiro, 1903) |                      |
|                             |                          |                                     | <i>Platanichthys platana</i>       | (Regan, 1917)                       |                      |
|                             | Alosidae                 |                                     | <i>Sardinella brasiliensis</i>     | (Steindachner, 1879)                |                      |
|                             | Gymnotiformes            | Sternopygidae                       | Gymnotinae                         | <i>Eigenmannia virescens</i>        | (Valenciennes, 1836) |
|                             |                          | Gymnotidae                          |                                    | <i>Gymnotus carapo</i>              | Linnaeus, 1758       |
| <i>Gymnotus pantherinus</i> |                          |                                     |                                    | (Steindachner, 1908)                |                      |
| Hypopomidae                 |                          | <i>Brachyhypopomus janeiroensis</i> |                                    | (Costa & Campos-da-Paz, 1992)       |                      |
| Characiformes               | Crenuchidae              | Characidiinae                       | <i>Characidium alipioi</i>         | Travassos, 1955                     |                      |
|                             |                          |                                     | <i>Characidium grajahuense</i>     | Travassos, 1944                     |                      |
|                             |                          |                                     | <i>Characidium interruptum</i>     | Pellegrin, 1909                     |                      |
|                             |                          |                                     | <i>Characidium japyhybense</i>     | Travassos, 1949                     |                      |
|                             |                          |                                     | <i>Characidium lauroi</i>          | Travassos, 1949                     |                      |
|                             |                          |                                     | <i>Characidium litorale</i>        | Leitão & Buckup, 2014               |                      |
|                             |                          |                                     | <i>Characidium vidali</i>          | Travassos, 1967                     |                      |
|                             |                          |                                     | <i>Hoplerythrinus unitaeniatus</i> | (Spix & Agassiz, 1829)              |                      |
|                             | Erythrinidae             |                                     | <i>Hoplias malabaricus</i>         | (Bloch, 1794)                       |                      |
|                             |                          |                                     | <i>Colossoma macropomum</i>        | (Cuvier, 1816)                      |                      |
|                             | Serrasalmidae            | Colossomatinae                      | <i>Metynnis lippincottianus</i>    | (Cope, 1870)                        |                      |
|                             |                          | Serrasalminae                       |                                    |                                     |                      |

|                  |                  |                                      |                                    |
|------------------|------------------|--------------------------------------|------------------------------------|
| Anostomidae      |                  | <i>Metynnis maculatus</i>            | (Kner, 1858)                       |
|                  |                  | <i>Hypomasticus copelandii</i>       | (Steindachner, 1875)               |
|                  |                  | <i>Hypomasticus mormyrops</i>        | (Steindachner, 1875)               |
|                  |                  | <i>Hypomasticus thayeri</i>          | (Borodin, 1929)                    |
|                  |                  | <i>Megaleporinus conirostris</i>     | (Steindachner, 1875)               |
| Curimatidae      |                  | <i>Cyphocharax gilbert</i>           | (Quoy & Gaimard, 1824)             |
| Prochilodontidae |                  | <i>Prochilodus lineatus</i>          | (Valenciennes, 1837)               |
|                  |                  | <i>Prochilodus vimboides</i>         | Kner, 1859                         |
| Lebiasinidae     | Pyrrhulininae    | <i>Nannostomus beckfordi</i>         | Günther, 1872                      |
| Bryconidae       | Bryconinae       | <i>Pyrrhulina australis</i>          | Eigenmann & Kennedy, 1903          |
|                  |                  | <i>Pyrrhulina filamentosa</i>        | Valenciennes, 1847                 |
|                  |                  | <i>Brycon insignis</i>               | Steindachner, 1877                 |
|                  |                  | <i>Brycon opalinus</i>               | (Cuvier, 1819)                     |
| Characidae       | Salmininae       | <i>Salminus brasiliensis</i>         | (Cuvier, 1816)                     |
|                  | Stethaprioninae  | <i>Astyanax keronolepis</i>          | Silva, Malabarba & Malabarba, 2019 |
|                  |                  | <i>Astyanax lacustris</i>            | (Lütken, 1875)                     |
|                  |                  | <i>Deuterodon giton</i>              | (Eigenmann, 1908)                  |
|                  |                  | <i>Deuterodon hastatus</i>           | (Myers, 1928)                      |
|                  |                  | <i>Deuterodon heterostomus</i>       | (Eigenmann, 1911)                  |
|                  |                  | <i>Deuterodon intermedius</i>        | (Eigenmann, 1908)                  |
|                  |                  | <i>Deuterodon janeiroensis</i>       | (Eigenmann, 1908)                  |
|                  |                  | <i>Deuterodon luetkenii</i>          | (Boulenger, 1887)                  |
|                  |                  | <i>Deuterodon taeniatus</i>          | (Jenyns, 1842)                     |
|                  |                  | <i>Hollandichthys multifasciatus</i> | (Eigenmann & Norris, 1900)         |
|                  |                  | <i>Hyphessobrycon bifasciatus</i>    | Ellis, 1911                        |
|                  |                  | <i>Hyphessobrycon boulengeri</i>     | (Eigenmann, 1907)                  |
|                  |                  | <i>Hyphessobrycon eques</i>          | (Steindachner, 1882)               |
|                  |                  | <i>Hyphessobrycon flammeus</i>       | Myers, 1924                        |
|                  |                  | <i>Oligosarcus hepsetus</i>          | (Cuvier, 1829)                     |
|                  |                  | <i>Psalidodon parahybae</i>          | (Eigenmann, 1908)                  |
|                  | Spintherobolinae | <i>Spintherobolus broccae</i>        | Myers, 1925                        |
|                  | Aphyocharacinae  | <i>Aphyocharax anisitsi</i>          | Eigenmann & Kennedy, 1903          |
|                  | Stevardiinae     | <i>Bryconamericus microcephalus</i>  | (Miranda Ribeiro, 1908)            |
|                  |                  | <i>Bryconamericus ornaticeps</i>     | Bizerril & Perez-Neto, 1995        |
|                  |                  | <i>Bryconamericus tenuis</i>         | Bizerril & Auraujo, 1992           |
|                  |                  | <i>Knodus moenkhausii</i>            | (Eigenmann & Kennedy, 1903)        |
|                  |                  | <i>Mimagoniates microlepis</i>       | (Steindachner, 1877)               |
|                  |                  | <i>Piabina argentea</i>              | Reinhardt, 1867                    |

|              |                  |                                    |                                          |                                |
|--------------|------------------|------------------------------------|------------------------------------------|--------------------------------|
|              |                  |                                    | <i>Pseudocorynopoma doriae</i>           | Perugia, 1891                  |
| Siluriformes | Trichomycteridae | Trichogeninae                      | <i>Trichogenes longipinnis</i>           | Britski & Ortega, 1983         |
|              |                  | Trichomycterinae                   | <i>Trichomycterus albinotatus</i>        | Costa, 1992                    |
|              |                  |                                    | <i>Ituglanis parahybae</i>               | (Eigenmann, 1918)              |
|              |                  |                                    | <i>Trichomycterus auroguttatus</i>       | Costa, 1992                    |
|              |                  |                                    | <i>Trichomycterus caipora</i>            | Lima, Lazzarotto & Costa, 2008 |
|              |                  |                                    | <i>Trichomycterus claudiae</i>           | Barbosa & Costa, 2010          |
|              |                  |                                    | <i>Trichomycterus florensis</i>          | (Miranda-Ribeiro, 1943)        |
|              |                  |                                    | <i>Trichomycterus fuliginosus</i>        | Barbosa & Costa, 2010          |
|              |                  |                                    | <i>Trichomycterus giganteus</i>          | Lima & Costa, 2004             |
|              |                  |                                    | <i>Trichomycterus goeldii</i>            | Boulenger, 1896                |
|              |                  |                                    | <i>Trichomycterus itatiayae</i>          | Miranda Ribeiro, 1906          |
|              |                  |                                    | <i>Trichomycterus jacupiranga</i>        | Wosiacki & Oyakawa, 2005       |
|              |                  |                                    | <i>Trichomycterus largoperculatus</i>    | Costa & Katz, 2022             |
|              |                  |                                    | <i>Trichomycterus macrophthalmus</i>     | Barbosa & Costa, 2012          |
|              |                  |                                    | <i>Trichomycterus mariamole</i>          | Barbosa & Costa, 2010          |
|              |                  |                                    | <i>Trichomycterus mirissumba</i>         | Costa, 1992                    |
|              |                  |                                    | <i>Trichomycterus nigricans</i>          | Valenciennes, 1832             |
|              |                  |                                    | <i>Trichomycterus nigroauratus</i>       | Barbosa & Costa, 2008          |
|              |                  |                                    | <i>Trichomycterus paquequerense</i>      | (Miranda Ribeiro, 1943)        |
|              |                  |                                    | <i>Trichomycterus potschi</i>            | Barbosa & Costa, 2003          |
|              |                  |                                    | <i>Trichomycterus puriventris</i>        | Barbosa & Costa, 2012          |
|              |                  | <i>Trichomycterus travassosi</i>   | (Miranda Ribeiro, 1949)                  |                                |
|              |                  | <i>Trichomycterus vitalbrazili</i> | Vilardo, Katz & Costa, 2020              |                                |
|              | Microcambevinae  | <i>Listrura costai</i>             | Villa-Verde, Lazzarotto & Lima, 2012     |                                |
|              |                  | <i>Listrura nematopteryx</i>       | de Pinna, 1988                           |                                |
|              |                  | <i>Listrura tetraradiata</i>       | Landim & Costa, 2002                     |                                |
|              |                  | <i>Microcambeva barbata</i>        | Costa & Bockmann, 1994                   |                                |
|              |                  | <i>Microcambeva bendego</i>        | Medeiros, Moreira, de Pinna & Lima, 2020 |                                |
|              | Stegophilinae    | <i>Homodiaetus banguela</i>        | Koch, 2002                               |                                |
|              |                  | <i>Homodiaetus passarellii</i>     | (Miranda Ribeiro, 1944)                  |                                |
|              | Callichthyidae   | Callichthyinae                     | <i>Callichthys callichthys</i>           | (Linnaeus, 1758)               |
|              |                  |                                    | <i>Hoplosternum littorale</i>            | (Hancock, 1828)                |
|              |                  | Corydoradinae                      | <i>Corydoras nattereri</i>               | Steindachner, 1876             |

|              |                  |                                    |                                         |
|--------------|------------------|------------------------------------|-----------------------------------------|
| Loricariidae | Delturinae       | <i>Scleromystax barbatus</i>       | (Quoy & Gaimard, 1824)                  |
|              |                  | <i>Scleromystax prionotos</i>      | (Nijssen & Isbrücker, 1980)             |
|              |                  | <i>Delturus parahybae</i>          | Eigenmann & Eigenmann, 1889             |
|              |                  | <i>Hemipsilichthys gobio</i>       | (Lütken, 1874)                          |
|              |                  | <i>Hemipsilichthys nimius</i>      | Pereira, Reis, Souza & Lazzarotto, 2003 |
|              |                  | <i>Hemipsilichthys papillatus</i>  | Pereira, Oliveira & Oyakawa, 2000       |
|              | Rhinelepinae     | <i>Pogonopoma parahybae</i>        | (Steindachner, 1877)                    |
|              | Loricariinae     | <i>Harttia carvalhoi</i>           | Miranda Ribeiro, 1939                   |
|              |                  | <i>Harttia loricariformis</i>      | Steindachner, 1877                      |
|              |                  | <i>Loricariichthys castaneus</i>   | (Castelnau, 1855)                       |
|              |                  | <i>Rineloricaria nigricauda</i>    | (Regan, 1904)                           |
|              |                  | <i>Rineloricaria nudipectoris</i>  | Mejia, Ferrar & Backup, 2023            |
|              |                  | <i>Rineloricaria steindachneri</i> | (Regan, 1904)                           |
|              |                  | <i>Rineloricaria zawadzki</i>      | Silva, Costa & Oliveira, 2022           |
|              |                  |                                    |                                         |
|              | Hypoptopomatinae | <i>Hisonotus notatus</i>           | Eigenmann & Eigenmann, 1889             |
|              |                  | <i>Hisonotus thayeri</i>           | Martins & Langeani, 2016                |
|              |                  | <i>Kronichthys heylandi</i>        | (Boulenger, 1900)                       |
|              |                  | <i>Neoplecostomus microps</i>      | (Steindachner, 1877)                    |
|              |                  | <i>Neoplecostomus paraty</i>       | Cherobim, Lazzarotto & Langeani, 2016   |
|              |                  | <i>Neoplecostomus variipictus</i>  | Bizerril, 1995                          |
|              |                  | <i>Otocinclus affinis</i>          | Steindachner, 1877                      |
|              |                  | <i>Otothyris lophophanes</i>       | (Eigenmann & Eigenmann, 1889)           |
|              |                  | <i>Pareiorhaphis garbei</i>        | (Ihering, 1911)                         |
|              |                  | <i>Pareiorhina brachyrhyncha</i>   | Chamon, Aranda & Backup, 2005           |
|              |                  | <i>Pareiorhina rudolphi</i>        | (Miranda Ribeiro, 1911)                 |
|              |                  | <i>Parotocinclus bidentatus</i>    | Gauger & Backup, 2005                   |
|              |                  | <i>Parotocinclus fluminense</i>    | Roxo, Melo, Silva & Oliveira, 2017      |
|              |                  | <i>Parotocinclus maculicauda</i>   | (Steindachner, 1877)                    |
|              |                  | <i>Parotocinclus muriaensis</i>    | Gauger & Backup, 2005                   |
|              |                  | <i>Pseudotothyris janeirensis</i>  | Britski & Garavello, 1984               |
|              |                  | <i>Schizolecis guentheri</i>       | (Miranda Ribeiro, 1918)                 |
|              | Hypostominae     | <i>Ancistrus multispinis</i>       | (Regan, 1912)                           |

|                   |                 |               |                                     |                                |
|-------------------|-----------------|---------------|-------------------------------------|--------------------------------|
|                   |                 |               | <i>Hypostomus affinis</i>           | (Steindachner, 1877)           |
|                   |                 |               | <i>Hypostomus auroguttatus</i>      | Kner, 1854                     |
|                   |                 |               | <i>Hypostomus luetkeni</i>          | (Steindachner, 1877)           |
|                   |                 |               | <i>Hypostomus punctatus</i>         | Valenciennes, 1840             |
|                   |                 |               | <i>Hypostomus vermicularis</i>      | (Eigenmann & Eigenmann, 1888)  |
| Auchenipteridae   | Centromochlinae |               | <i>Glanidium melanopterum</i>       | Miranda Ribeiro, 1918          |
|                   | Auchenipterinae |               | <i>Trachelyopterus striatulus</i>   | (Steindachner, 1877)           |
| Heptapteridae     | Rhamdiinae      |               | <i>Pimelodella lateristriga</i>     | (Lichtenstein, 1823)           |
|                   |                 |               | <i>Rhamdia quelen</i>               | (Quoy & Gaimard, 1824)         |
|                   | Heptapterinae   |               | <i>Acentronichthys leptos</i>       | Eigenmann & Eigenmann, 1889    |
|                   |                 |               | <i>Imparfinis minutus</i>           | (Lütken, 1874)                 |
|                   |                 |               | <i>Imparfinis piperatus</i>         | Eigenmann & Norris, 1900       |
|                   |                 |               | <i>Rhamdioglanis frenatus</i>       | Ihering, 1907                  |
|                   |                 |               | <i>Rhamdioglanis transfasciatus</i> | Miranda Ribeiro, 1908          |
|                   |                 |               | <i>Taunayia bifasciata</i>          | (Eigenmann & Norris, 1900)     |
| Pimelodidae       |                 |               | <i>Pimelodus maculatus</i>          | Lacepède, 1803                 |
|                   |                 |               | <i>Steindachneridion parahybae</i>  | (Steindachner, 1877)           |
| Pseudopimelodidae |                 |               | <i>Microglanis nigripinnis</i>      | Bizerril & Perez-Neto, 1992    |
|                   |                 |               | <i>Microglanis parahybae</i>        | (Steindachner, 1880)           |
|                   |                 |               | <i>Microglanis pleriqueater</i>     | Mattos, Ottoni & Barbosa, 2013 |
| Clariidae         |                 |               | <i>Clarias gariepinus</i>           | (Burchell, 1822)               |
| Ariidae           | Ariinae         |               | <i>Cathorops spixii</i>             | (Agassiz, 1829)                |
|                   |                 |               | <i>Genidens barbatus</i>            | (Lacepède, 1803)               |
|                   |                 |               | <i>Genidens genidens</i>            | (Cuvier, 1829)                 |
|                   |                 |               | <i>Genidens machadoi</i>            | (Miranda Ribeiro, 1918)        |
|                   |                 |               | <i>Notarius luniscutis</i>          | (Valenciennes, 1840)           |
|                   |                 |               | <i>Paragenidens grandoculis</i>     | (Steindachner, 1877)           |
|                   |                 | Bagreinae     | <i>Bagre bagre</i>                  | (Linnaeus, 1766)               |
| Salmoniformes     | Salmonidae      | Salmoninae    | <i>Oncorhynchus mykiss</i>          | (Walbaum, 1792)                |
| Aulopiformes      | Synodontidae    | Synodontinae  | <i>Synodus intermedius</i>          | (Spix & Agassiz, 1829)         |
|                   |                 | Harpadontinae | <i>Saurida brasiliensis</i>         | Norman, 1935                   |
| Batrachoidiformes | Batrachoididae  | Porichthyinae | <i>Porichthys porosissimus</i>      | (Cuvier, 1829)                 |
| Gobiiformes       | Eleotridae      | Eleotrinae    | <i>Dormitator maculatus</i>         | (Bloch, 1792)                  |
|                   |                 |               | <i>Eleotris pisonis</i>             | (Gmelin, 1789)                 |
|                   |                 |               | <i>Guavina guavina</i>              | (Valenciennes, 1837)           |
|                   | Oxudercidae     | Gobionellinae | <i>Awaous tajasica</i>              | (Lichtenstein, 1822)           |
|                   |                 |               | <i>Ctenogobius boleosoma</i>        | (Jordan & Gilbert, 1882)       |

|                  |                 |                 |                                  |                                      |
|------------------|-----------------|-----------------|----------------------------------|--------------------------------------|
|                  |                 |                 | <i>Ctenogobius saepepallens</i>  | (Gilbert & Randall, 1968)            |
|                  |                 |                 | <i>Ctenogobius shufeldti</i>     | (Jordan & Eigenmann, 1887)           |
|                  |                 |                 | <i>Ctenogobius smaragdus</i>     | (Valenciennes, 1837)                 |
|                  |                 |                 | <i>Ctenogobius stigmaticus</i>   | (Poey, 1860)                         |
|                  |                 |                 | <i>Evorthodus lyricus</i>        | (Girard, 1858)                       |
|                  |                 |                 | <i>Gobioides broussonnetii</i>   | Lacepède, 1800                       |
|                  |                 |                 | <i>Gobionellus boleosoma</i>     | (Jordan & Gilbert, 1882)             |
|                  |                 |                 | <i>Gobionellus oceanicus</i>     | (Pallas, 1770)                       |
|                  |                 |                 | <i>Gobionellus stomatus</i>      | Starks, 1913                         |
|                  | Gobiidae        | Gobiinae        | <i>Barbulifer enigmaticus</i>    | Joyeux, van Tassell & Macieira, 2009 |
|                  |                 |                 | <i>Bathygobius soporator</i>     | (Valenciennes, 1837)                 |
|                  |                 |                 | <i>Microgobius meeki</i>         | Evermann & Marsh, 1899               |
| Syngnathiformes  | Dactylopteridae |                 | <i>Dactylopterus volitans</i>    | (Linnaeus, 1758)                     |
|                  | Aulostomidae    |                 | <i>Aulostomus strigosus</i>      | Wheeler, 1955                        |
|                  | Syngnathidae    | Nerophinae      | <i>Microphis lineatus</i>        | (Kaup, 1856)                         |
|                  |                 | Syngnathinae    | <i>Pseudophallus mindii</i>      | (Meek & Hildebrand, 1923)            |
|                  |                 |                 | <i>Syngnathus folletti</i>       | Herald, 1942                         |
| Scombriformes    | Pomatomidae     |                 | <i>Pomatomus saltatrix</i>       | (Linnaeus, 1766)                     |
|                  | Trichiuridae    | Trichiurinae    | <i>Trichiurus lepturus</i>       | Linnaeus, 1758                       |
| Synbranchiformes | Synbranchidae   |                 | <i>Synbranchus marmoratus</i>    | Bloch, 1795                          |
| Anabantiformes   | Osphronemidae   | Trichogastrinae | <i>Trichopodus trichopterus</i>  | (Pallas, 1770)                       |
|                  |                 | Macropodusinae  | <i>Trichopsis vittata</i>        | (Cuvier, 1831)                       |
| Carangiformes    | Centropomidae   |                 | <i>Centropomus parallelus</i>    | Poey, 1860                           |
|                  |                 |                 | <i>Centropomus undecimalis</i>   | (Bloch, 1792)                        |
|                  | Polynemidae     |                 | <i>Polydactylus oligodon</i>     | (Günther, 1860)                      |
|                  |                 |                 | <i>Polydactylus virginicus</i>   | (Linnaeus, 1758)                     |
|                  | Cyclopsettidae  |                 | <i>Citharichthys arenaceus</i>   | Evermann & Marsh, 1900               |
|                  |                 |                 | <i>Citharichthys macrops</i>     | Dresel, 1885                         |
|                  |                 |                 | <i>Citharichthys spilopterus</i> | Günther, 1862                        |
|                  |                 |                 | <i>Etropus crossotus</i>         | Jordan & Gilbert, 1882               |
|                  |                 |                 | <i>Syacium micrurum</i>          | Ranzani, 1842                        |
|                  | Paralichthyidae |                 | <i>Paralichthys brasiliensis</i> | (Ranzani, 1842)                      |
|                  |                 | Achiridae       | <i>Achirus declivis</i>          | Chabanaud, 1940                      |
|                  |                 |                 | <i>Achirus lineatus</i>          | (Linnaeus, 1758)                     |
|                  |                 |                 | <i>Catathyridium garmani</i>     | (Jordan, 1889)                       |
|                  |                 |                 | <i>Trinectes microphthalmus</i>  | (Chabanaud, 1928)                    |
|                  |                 |                 | <i>Trinectes paulistanus</i>     | (Miranda-Ribeiro, 1915)              |
|                  | Cynoglossidae   | Symphurinae     | <i>Symphurus jenynsi</i>         | Evermann & Kendall, 1906             |

|                    |                |                  |                                      |                                     |
|--------------------|----------------|------------------|--------------------------------------|-------------------------------------|
|                    |                |                  | <i>Symphurus plagusia</i>            | (Bloch & Schneider, 1801)           |
|                    |                |                  | <i>Symphurus tessellatus</i>         | (Quoy & Gaimard, 1824)              |
|                    | Carangidae     | Caranginae       | <i>Carangoides bartholomaei</i>      | Cuvier, 1833                        |
|                    |                |                  | <i>Caranx crysos</i>                 | (Mitchill, 1815)                    |
|                    |                |                  | <i>Caranx hippos</i>                 | (Linnaeus, 1766)                    |
|                    |                |                  | <i>Caranx latus</i>                  | Agassiz, 1831                       |
|                    |                |                  | <i>Chloroscombrus chrysurus</i>      | (Linnaeus, 1766)                    |
|                    |                |                  | <i>Selene vomer</i>                  | (Linnaeus, 1758)                    |
|                    |                | Scomberoidinae   | <i>Oligoplites palometa</i>          | Oligoplites palometa (Cuvier, 1832) |
|                    |                |                  | <i>Oligoplites saliens</i>           | (Bloch, 1793)                       |
|                    |                |                  | <i>Oligoplites saurus</i>            | (Bloch & Schneider, 1801)           |
|                    |                | Trachinotinae    | <i>Trachinotus carolinus</i>         | (Linnaeus, 1766)                    |
|                    |                |                  | <i>Trachinotus falcatus</i>          | (Linnaeus, 1758)                    |
| Atheriniformes     | Atherinopsidae | Atherinopsinae   | <i>Odontesthes argentinensis</i>     | (Valenciennes, 1835)                |
|                    |                | Menidiinae       | <i>Atherinella brasiliensis</i>      | (Quoy & Gaimard, 1825)              |
| Beloniformes       | Belonidae      |                  | <i>Strongylura marina</i>            | (Walbaum, 1792)                     |
|                    |                |                  | <i>Strongylura timucu</i>            | (Walbaum, 1792)                     |
|                    | Hemiramphidae  |                  | <i>Hemiramphus brasiliensis</i>      | (Linnaeus, 1758)                    |
|                    |                |                  | <i>Hyporhamphus roberti</i>          | (Valenciennes, 1847)                |
|                    |                |                  | <i>Hyporhamphus unifasciatus</i>     | (Ranzani, 1841)                     |
| Cyprinodontiformes | Rivulidae      | Rivulinae        | <i>Atlantirivulus guanabarensis</i>  | Costa, 2014                         |
|                    |                |                  | <i>Atlantirivulus janeiroensis</i>   | (Costa, 1991)                       |
|                    |                |                  | <i>Atlantirivulus jurubatibensis</i> | (Costa, 2008)                       |
|                    |                |                  | <i>Atlantirivulus lazzarotoi</i>     | (Costa, 2007)                       |
|                    |                |                  | <i>Atlantirivulus maricensis</i>     | Costa, 2014                         |
|                    |                |                  | <i>Atlantirivulus simplicis</i>      | (Costa, 2004)                       |
|                    |                | Kryptolebiatinae | <i>Kryptolebias brasiliensis</i>     | (Valenciennes, 1821)                |
|                    |                |                  | <i>Kryptolebias caudomarginatus</i>  | (Seegers, 1984)                     |
|                    |                |                  | <i>Kryptolebias gracilis</i>         | Costa, 2007                         |
|                    |                |                  | <i>Kryptolebias ocellatus</i>        | (Hensel, 1868)                      |
|                    |                | Cynolebiinae     | <i>Leptolebias marmoratus</i>        | (Ladiges, 1934)                     |
|                    |                |                  | <i>Leptopanchax citrinipinnis</i>    | (Costa, Lacerda & Tanizaki, 1988)   |
|                    |                |                  | <i>Leptopanchax opalescens</i>       | (Myers, 1942)                       |
|                    |                |                  | <i>Leptopanchax sanguineus</i>       | Costa, 2019                         |
|                    |                |                  | <i>Leptopanchax splendens</i>        | (Myers, 1942)                       |
|                    |                |                  | <i>Nematolebias papilliferus</i>     | Costa, 2002                         |
|                    |                |                  | <i>Nematolebias whitei</i>           | (Myers, 1942)                       |
|                    |                |                  | <i>Notholebias cruzi</i>             | (Costa, 1988)                       |

|               |               |                     |                                    |                                                  |
|---------------|---------------|---------------------|------------------------------------|--------------------------------------------------|
|               |               |                     | <i>Notholebias fractifasciatus</i> | (Costa, 1988)                                    |
|               |               |                     | <i>Notholebias minimus</i>         | (Myers, 1942)                                    |
|               |               |                     | <i>Ophthalmolebias constanciae</i> | (Myers, 1942)                                    |
|               | Poeciliidae   | Poeciliinae         | <i>Phalloceros anisophallos</i>    | Lucinda, 2008                                    |
|               |               |                     | <i>Phalloceros enneaktinos</i>     | Lucinda, 2008                                    |
|               |               |                     | <i>Phalloceros harpagos</i>        | Lucinda, 2008                                    |
|               |               |                     | <i>Phalloceros leptokeras</i>      | Lucinda, 2008                                    |
|               |               |                     | <i>Phalloceros tupinamba</i>       | Lucinda, 2008                                    |
|               |               |                     | <i>Phalloptychus januarius</i>     | (Hensel, 1868)                                   |
|               |               |                     | <i>Phallotorynus fasciolatus</i>   | Henn, 1916                                       |
|               |               |                     | <i>Poecilia reticulata</i>         | Peters, 1859                                     |
|               |               |                     | <i>Poecilia vivipara</i>           | Bloch & Schneider, 1801                          |
|               |               |                     | <i>Xiphophorus helleri</i>         | Heckel, 1848                                     |
|               | Anablepidae   | Anablepinae         | <i>Jenynsia darwini</i>            | Amorim, 2018                                     |
|               |               |                     | <i>Jenynsia lineata</i>            | (Jenyns, 1842)                                   |
| Cichliiformes | Polycentridae |                     | <i>Polycentrus schomburgkii</i>    | Müller & Troschel, 1849                          |
|               | Cichlidae     | Pseudocrenilabrinae | <i>Coptodon rendalli</i>           | (Boulenger, 1897)                                |
|               |               |                     | <i>Oreochromis niloticus</i>       | (Linnaeus, 1758)                                 |
|               |               | Cichlinae           | <i>Apistogramma cacatuoides</i>    | Hoedeman, 1951                                   |
|               |               |                     | <i>Astronotus ocellatus</i>        | (Agassiz, 1831)                                  |
|               |               |                     | <i>Australoheros ipatinguensis</i> | Otoni & Costa, 200                               |
|               |               |                     | <i>Australoheros oblongus</i>      | (Castelnau 1855)                                 |
|               |               |                     | <i>Cichla kelberi</i>              | Kullander & Ferreira, 2006                       |
|               |               |                     | <i>Crenicichla lacustris</i>       | (Castelnau, 1855)                                |
|               |               |                     | <i>Crenicichla lepidota</i>        | Heckel, 1840                                     |
|               |               |                     | <i>Geophagus brasiliensis</i>      | (Quoy & Gaimard, 1824)                           |
|               |               |                     | <i>Parachromis managuensis</i>     | (Günther, 1867)                                  |
| Mugiliiformes | Mugilidae     |                     | <i>Mugil brevirostris</i>          | (Ribeiro, 1915)                                  |
|               |               |                     | <i>Mugil curema</i>                | Valenciennes, 1836                               |
|               |               |                     | <i>Mugil curvidens</i>             | Valenciennes, 1836                               |
|               |               |                     | <i>Mugil liza</i>                  | Valenciennes, 1836                               |
|               |               |                     | <i>Mugil rubrioculus</i>           | Harrison, Nirchio, Oliveira, Ron & Gaviria, 2007 |
|               |               |                     |                                    |                                                  |
| Blenniiformes | Pomacentridae | Microspathodontinae | <i>Stegastes fuscus</i>            | (Cuvier, 1830)                                   |
|               |               | Glyphisodontinae    | <i>Abudefduf saxatilis</i>         | (Linnaeus, 1758)                                 |
|               | Gobiesocidae  | Gobiesocinae        | <i>Gobiesox barbatulus</i>         | Starks, 1913                                     |
|               | Blenniidae    | Salariinae          | <i>Hypleurochilus fissicornis</i>  | (Quoy & Gaimard, 1824)                           |
|               |               |                     | <i>Parablennius pilicornis</i>     | (Cuvier, 1829)                                   |
|               |               |                     | <i>Scartella cristata</i>          | (Linnaeus, 1758)                                 |



|                 |                |              |                                   |                           |
|-----------------|----------------|--------------|-----------------------------------|---------------------------|
|                 | Labrisomidae   |              | <i>Labrisomus nuchipinnis</i>     | (Quoy & Gaimard, 1824)    |
|                 |                |              | <i>Malaccoctenus delalandii</i>   | (Valenciennes, 1836)      |
| Perciformes     | Serranidae     |              | <i>Serranus baldwini</i>          | (Evermann & Marsh, 1899)  |
|                 | Anthiadidae    |              | <i>Acanthistius brasilianus</i>   | (Cuvier, 1828)            |
|                 | Epinephelidae  |              | <i>Alphestes afer</i>             | (Bloch, 1793)             |
|                 |                |              | <i>Epinephelus niveatus</i>       | (Valenciennes, 1828)      |
|                 |                |              | <i>Mycteroperca acutirostris</i>  | (Valenciennes, 1828)      |
|                 |                |              | <i>Mycteroperca microlepis</i>    | (Goode & Bean, 1879)      |
|                 | Triglidae      | Prionotinae  | <i>Prionotus punctatus</i>        | (Bloch, 1793)             |
|                 | Scorpaenidae   | Scorpaeninae | <i>Scorpaena plumieri</i>         | Bloch, 1789               |
| Labriiformes    | Uranoscopidae  |              | <i>Astroscopus y-graecum</i>      |                           |
| Acanthuriformes | Gerreidae      |              | <i>Diapterus auratus</i>          | Ranzani, 1842             |
|                 |                |              | <i>Diapterus rhombeus</i>         | (Cuvier, 1829)            |
|                 |                |              | <i>Eucinostomus argenteus</i>     | Baird & Girard, 1855      |
|                 |                |              | <i>Eucinostomus gula</i>          | (Quoy & Gaimard, 1824)    |
|                 |                |              | <i>Eucinostomus melanopterus</i>  | (Bleeker, 1863)           |
|                 |                |              | <i>Eugerres brasilianus</i>       | (Cuvier, 1830)            |
|                 |                |              | <i>Ulaema lefroyi</i>             | (Goode, 1874)             |
|                 | Ephippidae     |              | <i>Chaetodipterus faber</i>       | (Broussonet, 1782)        |
|                 | Sciaenidae     |              | <i>Bairdiella ronchus</i>         | (Cuvier, 1830)            |
|                 |                |              | <i>Cynoscion leiarchus</i>        | (Cuvier, 1830)            |
|                 |                |              | <i>Larimus breviceps</i>          | Cuvier, 1830              |
|                 |                |              | <i>Menticirrhus americanus</i>    | (Linnaeus, 1758)          |
|                 |                |              | <i>Micropogonias furnieri</i>     | (Desmarest, 1823)         |
|                 |                |              | <i>Odontoscion dentex</i>         | (Cuvier, 1830)            |
|                 |                |              | <i>Pachyurus adspersus</i>        | Steindachner, 1879        |
|                 |                |              | <i>Plagioscion squamosissimus</i> | (Heckel, 1840)            |
|                 |                |              | <i>Pogonias courbina</i>          | (Linnaeus, 1766)          |
|                 |                |              | <i>Stellifer brasiliensis</i>     | (Schultz, 1945)           |
|                 |                |              | <i>Stellifer microps</i>          | (Steindachner, 1864)      |
|                 |                |              | <i>Stellifer punctatissimus</i>   | (Meek & Hildebrand, 1925) |
|                 |                |              | <i>Stellifer rastrifer</i>        | (Jordan, 1889)            |
|                 |                |              | <i>Umbrina canosai</i>            | Berg, 1895                |
|                 |                |              | <i>Umbrina coroides</i>           | Cuvier, 1830              |
|                 | Haemulidae     | Haemulinae   | <i>Conodon nobilis</i>            | (Linnaeus, 1758)          |
|                 |                |              | <i>Haemulon plumieri</i>          | (Lacepède, 1801)          |
|                 |                |              | <i>Pomadasys ramosus</i>          | (Poey, 1860)              |
|                 |                |              | <i>Rhonciscus crocro</i>          | (Cuvier, 1830)            |
|                 | Lutjanidae     | Lutjaninae   | <i>Lutjanus jocu</i>              | (Bloch & Schneider, 1801) |
|                 | Pomacanthidae  |              | <i>Holacanthus tricolor</i>       | (Bloch, 1795)             |
|                 | Chaetodontidae |              | <i>Chaetodon striatus</i>         | Linnaeus, 1758            |

|                   |                |                                    |                      |
|-------------------|----------------|------------------------------------|----------------------|
|                   | Sparidae       | <i>Archosargus probatocephalus</i> | (Walbaum, 1792)      |
|                   |                | <i>Archosargus rhomboidalis</i>    | (Linnaeus, 1758)     |
|                   |                | <i>Diplodus argenteus</i>          | (Valenciennes, 1830) |
| Tetraodontiformes | Diodontidae    | <i>Chilomycterus spinosus</i>      | (Linnaeus, 1758)     |
|                   | Tetraodontidae | <i>Lagocephalus lagocephalus</i>   | (Linnaeus, 1758)     |
|                   |                | <i>Sphoeroides greeleyi</i>        | Gilbert, 1900        |
|                   |                | <i>Sphoeroides spengleri</i>       | (Bloch, 1785)        |
|                   |                | <i>Sphoeroides testudineus</i>     | (Linnaeus, 1758)     |
|                   | Monacanthidae  | <i>Stephanolepis hispidus</i>      | (Linnaeus, 1766)     |
